# Supplementary material for: Amide directed selectivity switch in distal C-H arylation of α-naphthoic acids
Source: Research Square preprint supplement (doi:10.21203/rs.3.rs-1503504/v1), 2022-04-07

## checkCIF/PLATON report

Structure factors have been supplied for datablock(s) dm-skp-3-48-2\_cu

THIS REPORT IS FOR GUIDANCE ONLY. IF USED AS PART OF A REVIEW PROCEDURE FOR PUBLICATION, IT SHOULD NOT REPLACE THE EXPERTISE OF AN EXPERIENCED CRYSTALLOGRAPHIC REFEREE.

No syntax errors found.      CIF dictionary      Interpreting this report

### Datablock: dm-skp-3-48-2\_cu

---

|                        |                |                           |              |
|------------------------|----------------|---------------------------|--------------|
| Bond precision:        | C-C = 0.0087 Å | Wavelength=1.54184        |              |
| Cell:                  | a=15.2362 (7)  | b=18.0958 (7)             | c=7.8354 (4) |
|                        | alpha=90       | beta=90                   | gamma=90     |
| Temperature:           | 150 K          |                           |              |
|                        | Calculated     | Reported                  |              |
| Volume                 | 2160.31 (17)   | 2160.31 (17)              |              |
| Space group            | P 21 21 2      | P 21 21 2                 |              |
| Hall group             | P 2 2ab        | P 2 2ab                   |              |
| Moiety formula         | C24 H26 N2 O4  | 0.444 (C24 H26 N2 O4)     |              |
| Sum formula            | C24 H26 N2 O4  | C10.67 H11.56 N0.89 O1.78 |              |
| Mr                     | 406.47         | 180.65                    |              |
| Dx, g cm <sup>-3</sup> | 1.250          | 1.250                     |              |
| Z                      | 4              | 9                         |              |
| Mu (mm <sup>-1</sup> ) | 0.692          | 0.692                     |              |
| F000                   | 864.0          | 864.0                     |              |
| F000'                  | 866.64         |                           |              |
| h, k, lmax             | 18, 22, 9      | 18, 22, 9                 |              |
| Nref                   | 4310 [ 2468]   | 4112                      |              |
| Tmin, Tmax             | 0.951, 0.966   | 0.041, 1.000              |              |
| Tmin'                  | 0.944          |                           |              |

Correction method= # Reported T Limits: Tmin=0.041 Tmax=1.000  
AbsCorr = MULTI-SCAN

Data completeness= 1.67/0.95      Theta(max)= 72.729

|                                |                   |
|--------------------------------|-------------------|
| R(reflections)= 0.0786 ( 2658) | wR2(reflections)= |
| S = 1.015                      | 0.2273 ( 4112)    |
| Npar= 276                      |                   |

---

The following ALERTS were generated. Each ALERT has the format

**test-name\_ALERT\_alert-type\_alert-level.**

Click on the hyperlinks for more details of the test.

---

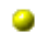

### Alert level C

RINTA01\_ALERT\_3\_C The value of Rint is greater than 0.12

Rint given 0.120

PLAT340\_ALERT\_3\_C Low Bond Precision on C-C Bonds ..... 0.00874 Ang.  
PLAT906\_ALERT\_3\_C Large K Value in the Analysis of Variance ..... 2.836 Check  
PLAT907\_ALERT\_2\_C Flack x > 0.5, Structure Needs to be Inverted? . 0.70 Check  
PLAT911\_ALERT\_3\_C Missing FCF Refl Between Thmin & STh/L= 0.600 11 Report

---

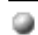

### Alert level G

FORMU01\_ALERT\_1\_G There is a discrepancy between the atom counts in the  
\_chemical\_formula\_sum and \_chemical\_formula\_moiety. This is  
usually due to the moiety formula being in the wrong format.

Atom count from \_chemical\_formula\_sum: C10.67 H11.56 N0.89 O1.78

Atom count from \_chemical\_formula\_moiety: C10.656 H11.544 N0.888 O1.776

CELLZ01\_ALERT\_1\_G Difference between formula and atom\_site contents detected.

CELLZ01\_ALERT\_1\_G ALERT: check formula stoichiometry or atom site occupancies.

From the CIF: \_cell\_formula\_units\_Z 9

From the CIF: \_chemical\_formula\_sum C10.67 H11.56 N0.89 O1.78

TEST: Compare cell contents of formula and atom\_site data

| atom | Z*formula | cif sites | diff |
|------|-----------|-----------|------|
| C    | 96.03     | 96.00     | 0.03 |
| H    | 104.04    | 104.00    | 0.04 |
| N    | 8.01      | 8.00      | 0.01 |
| O    | 16.02     | 16.00     | 0.02 |

PLAT032\_ALERT\_4\_G Std. Uncertainty on Flack Parameter Value High . 0.400 Report  
PLAT042\_ALERT\_1\_G Calc. and Reported Moiety Formula Strings Differ Please Check  
PLAT045\_ALERT\_1\_G Calculated and Reported Z Differ by a Factor ... 0.4444 Check  
PLAT720\_ALERT\_4\_G Number of Unusual/Non-Standard Labels ..... 56 Note  
PLAT912\_ALERT\_4\_G Missing # of FCF Reflections Above STh/L= 0.600 34 Note  
PLAT916\_ALERT\_2\_G Hooft y and Flack x Parameter Values Differ by . 0.30 Check  
PLAT933\_ALERT\_2\_G Number of HKL-OMIT Records in Embedded .res File 13 Note  
PLAT941\_ALERT\_3\_G Average HKL Measurement Multiplicity ..... 3.8 Low  
PLAT978\_ALERT\_2\_G Number C-C Bonds with Positive Residual Density. 0 Info

---

0 **ALERT level A** = Most likely a serious problem - resolve or explain

0 **ALERT level B** = A potentially serious problem, consider carefully

5 **ALERT level C** = Check. Ensure it is not caused by an omission or oversight

12 **ALERT level G** = General information/check it is not something unexpected

5 ALERT type 1 CIF construction/syntax error, inconsistent or missing data

4 ALERT type 2 Indicator that the structure model may be wrong or deficient

5 ALERT type 3 Indicator that the structure quality may be low

3 ALERT type 4 Improvement, methodology, query or suggestion

0 ALERT type 5 Informative message, check

---

It is advisable to attempt to resolve as many as possible of the alerts in all categories. Often the minor alerts point to easily fixed oversights, errors and omissions in your CIF or refinement strategy, so attention to these fine details can be worthwhile. In order to resolve some of the more serious problems it may be necessary to carry out additional measurements or structure refinements. However, the purpose of your study may justify the reported deviations and the more serious of these should normally be commented upon in the discussion or experimental section of a paper or in the "special\_details" fields of the CIF. checkCIF was carefully designed to identify outliers and unusual parameters, but every test has its limitations and alerts that are not important in a particular case may appear. Conversely, the absence of alerts does not guarantee there are no aspects of the results needing attention. It is up to the individual to critically assess their own results and, if necessary, seek expert advice.

### **Publication of your CIF in IUCr journals**

A basic structural check has been run on your CIF. These basic checks will be run on all CIFs submitted for publication in IUCr journals (*Acta Crystallographica*, *Journal of Applied Crystallography*, *Journal of Synchrotron Radiation*); however, if you intend to submit to *Acta Crystallographica Section C* or *E* or *IUCrData*, you should make sure that full publication checks are run on the final version of your CIF prior to submission.

### **Publication of your CIF in other journals**

Please refer to the *Notes for Authors* of the relevant journal for any special instructions relating to CIF submission.

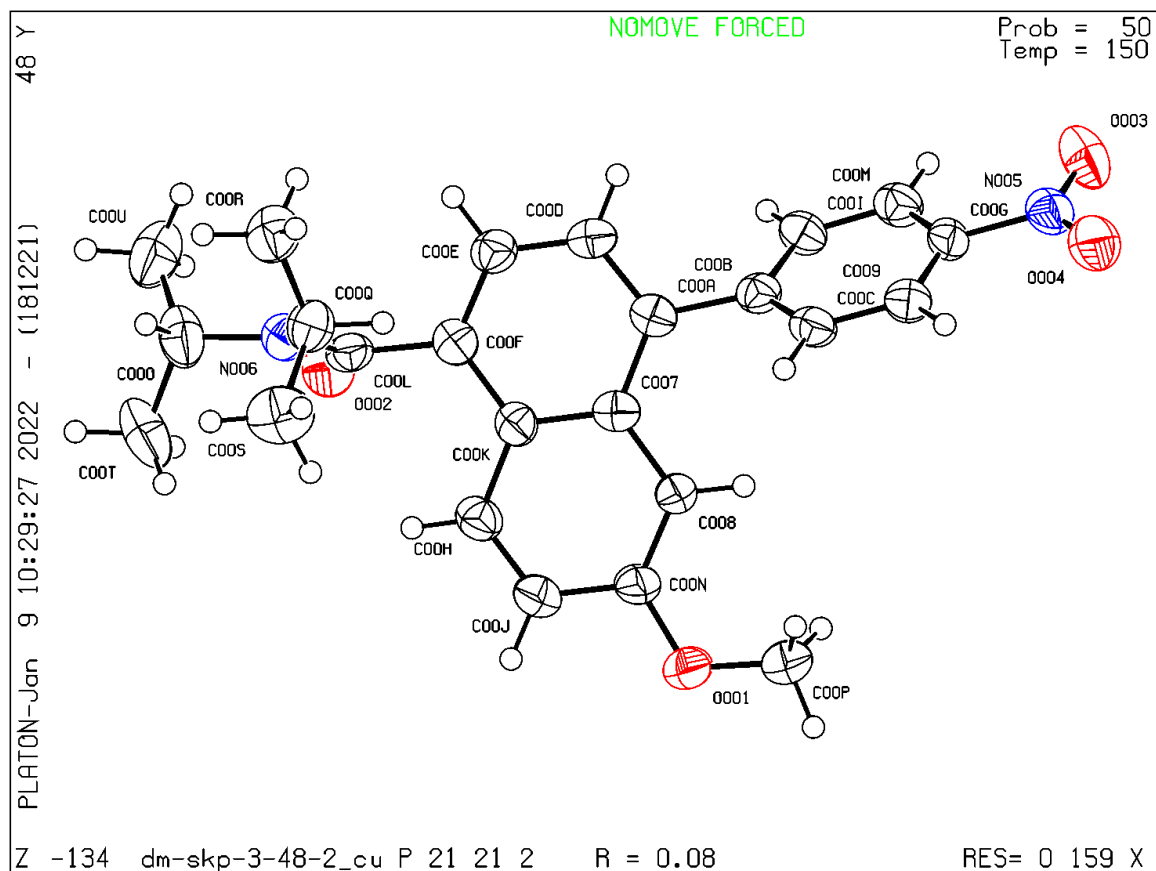

Supplement: Supplementary file 12 [file checkcif_3x.pdf › Cif files/checkcif_3x.pdf]
