# Supplementary material for: Amide directed selectivity switch in distal C-H arylation of α-naphthoic acids
Source: Research Square preprint supplement (doi:10.21203/rs.3.rs-1503504/v1), 2022-04-07

# Protecting group controlled selectivity switch in distal C–H arylation of $\alpha$ -naphthoic acids

Sukumar Pradhan,<sup>1</sup> Jyoti Prasad Biswas,<sup>1</sup> Mazen Elsaid,<sup>2</sup> Haibo Ge\*<sup>2</sup> & Debabrata Maiti\*<sup>1,3</sup>

<sup>1</sup>Department of chemistry, Indian Institute of Technology Bombay, Mumbai, India.

<sup>2</sup>Department of Chemistry and Biochemistry, Texas Tech University, Texas, USA

<sup>3</sup>Department of Interdisciplinary Programme in Climate Studies, IIT Bombay, Mumbai, India.

## *Supporting Information*

### *Table of Contents*

|      |                                                                                           |          |
|------|-------------------------------------------------------------------------------------------|----------|
| 1.   | General considerations.....                                                               | S2       |
| 2    | Experimental section.....                                                                 | S3       |
| 2.1  | Synthesis of $\alpha$ -naphthamide<br>from $\alpha$ -naphthoic acid .....                 | S3       |
| 2.2  | Optimization details of <i>p</i> -arylation<br>of $\alpha$ -naphthamide .....             | S4-S7    |
| 2.3  | Characterization of <i>p</i> -arylated $\alpha$ -naphthamide .....                        | S8-S27   |
| 2.4  | Characterization of <i>p</i> -arylated $\alpha$ -naphthamide with Aryl boronic acid ..... | S28-S31  |
| 2.5  | Characterization of <i>p</i> -arylated $\alpha$ -naphthamide with Aryl bromide .....      | S32-S35  |
| 2.6  | Protective variation of $\alpha$ -naphthamide.....                                        | S35-S39  |
| 2.7  | Characterization of <i>C7</i> -arylated $\alpha$ -naphthamide .....                       | S39-S46  |
| 2.8  | Kinetic studies.....                                                                      | S46-S54  |
| 2.9  | Crystal data.....                                                                         | S55-S68  |
| 2.10 | Reference.....                                                                            | S68      |
| 2.11 | NMR spectra.....                                                                          | S69-S145 |

## 1. General considerations:

**1a. Reagent information:** Unless otherwise stated, all reactions were carried out under air atmosphere in screw cap reaction tubes. All chemicals are commercially available and purchased from Sigma Aldrich, Alfa-Aesar, TCI and Spectrochem. Palladium (II) acetate was purchased from Alfa-Aesar. All the solvents were bought from Merck, TCI and Spectrochem in a sealed bottle and were used as received. For column chromatography, silica gel (100–200 mesh) from SRL Co. and neutral alumina from Merck was used. A gradient elution using petroleum-ether and ethyl acetate was performed, based on Merck aluminium TLC sheets (silica gel 60F<sub>254</sub>).

**1b. Analytical Information:** All isolated compounds were characterized by <sup>1</sup>H NMR, <sup>13</sup>C NMR spectroscopy, gas chromatography (GC), high resolution mass spectrometry (HRMS), infrared spectroscopy (IR), etc. Copies of the <sup>1</sup>H NMR, <sup>13</sup>C NMR can be found in the Supporting Information. Unless otherwise stated, all Nuclear Magnetic Resonance spectra were recorded on a Bruker xxx MHz and xxx MHz instrument. All <sup>1</sup>H NMR experiments were reported in units, parts per million (ppm), and were measured relative to the signals for residual chloroform (7.26 ppm) in the deuterated solvent, unless otherwise stated. All <sup>13</sup>C NMR spectra were reported in ppm relative to deuteriochloroform (77.23 ppm), unless otherwise stated, and all were obtained with <sup>1</sup>H decoupling. NMR of the crude reaction mixtures were performed by using 1,3,5-trimethoxybenzene as the internal standard. All GCMS analysis was done by Agilent 7890A GC system connected with 5975C inert XL EI/CI MSD (with triple axis detector). High-resolution mass spectra (HRMS) were recorded on a Q-TOF micromass (YA-105) mass spectrometer and a Bruker Maxis Impact (282001.00081) in ESI mode. X-ray crystallography was recorded at Department of Chemistry, IIT Bombay.

### 1.c. Description of Reaction Tube:

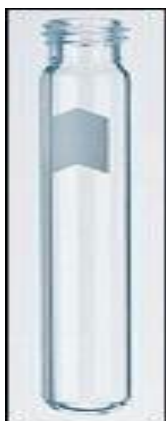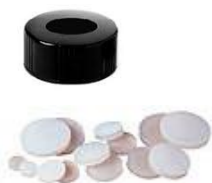

Pictorial description of reaction tube for *meta*-olefination: Fisherbrand Disposable Borosilicate Glass Tubes (16\*125mm) with Threaded End (Fisher Scientific Order No. 1495935A) [left]; Kimble Black Phenolic Screw Thread Closures with Open Tops (Fisher Scientific Order No. 033407E); Thermo Scientific National PTFE/Silicone Septa for Sample Screw Thread Caps (Fisher Scientific Order No. 03394A).

## 2. Experimental Section:

## General procedure A: Synthesis of $\alpha$ -naphthamide

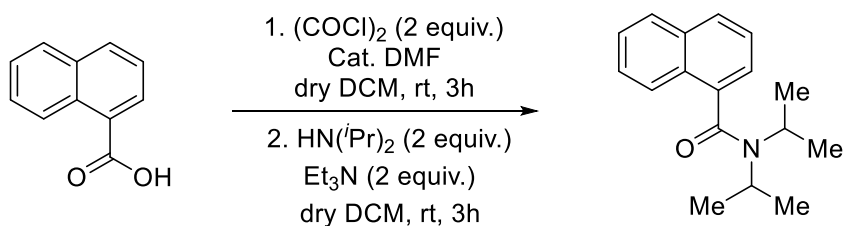

A 50 mL round-bottom flask was charged with 1-naphthoic acid (861 mg, 5 mmol), dry DCM (15 mL). The reaction mixture was cooled to 0 °C and stirred for 10 minutes. Then (COCl)<sub>2</sub> (0.56 mL, 1.3 equiv.) was added dropwise to the reaction mixture. After that catalytic amount of dry DMF was added and stirred at room temperature for 3 h. The resulting mixture was concentrated under reduced pressure to afford acid chloride quantitatively which was used directly without further purification for the next step. To a solution of diisopropylamine (0.92 mL, 1.3 equiv.) and Et<sub>3</sub>N (1.05 mL, 1.5 equiv.) in dry DCM (15 mL), acid chloride (1.0 equiv.) was added dropwise at 0 °C and the reaction mixture was stirred at room temperature for 12 h. Then water (40 mL) was added and aqueous layer was extracted with DCM (3 x 30 mL). The combined organic layer was washed with saturated aqueous NaHCO<sub>3</sub> (30 mL) solution followed by water (30 mL). After that, the organic layer was dried over Na<sub>2</sub>SO<sub>4</sub> and concentrated under reduced pressure. The crude mass was purified by silica gel column chromatography (10% ethyl acetate in hexane as eluent ) to give *N,N*-diisopropyl-1-naphthamide (1.18 g, 95%) as white solid. Spectral data are in accordance with the reported data

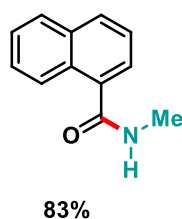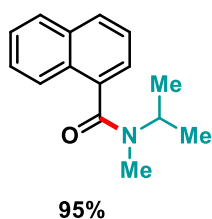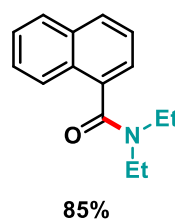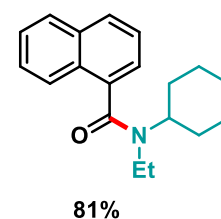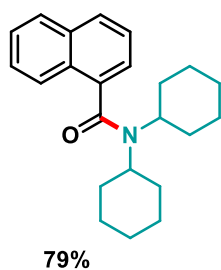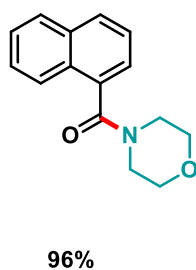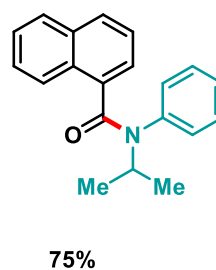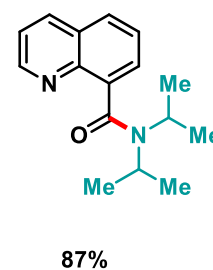

## Optimization details of *p*-arylation of $\alpha$ -naphthamide

**Table S1: Catalyst loading**

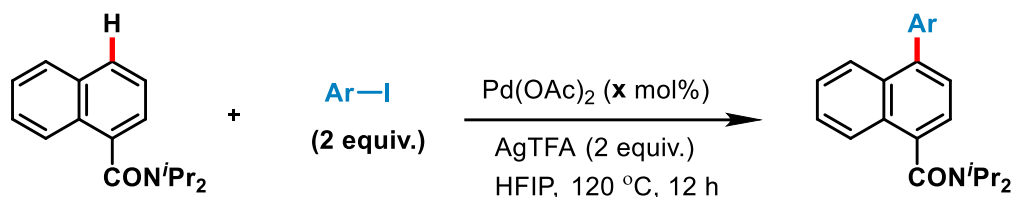

| Entry | Pd(OAc) <sub>2</sub> (mol%) | Yield (%) <sup>a</sup> | Selectivity |
|-------|-----------------------------|------------------------|-------------|
| 1.    | 0                           | nd                     | -           |
| 2.    | 0.5                         | nd                     | -           |
| 3.    | 1                           | Trace                  | -           |
| 4.    | 2                           | 11%                    | exclusive   |
| 5.    | 3                           | 25%                    | exclusive   |
| 6.    | 4                           | 29%                    | exclusive   |
| 7.    | 5                           | 33%                    | exclusive   |
| 8.    | 6                           | 49%                    | exclusive   |
| 9.    | 7                           | 52%                    | exclusive   |
| 10.   | 8                           | 53%                    | exclusive   |
| 11.   | 9                           | 59%                    | exclusive   |
| 12.   | 10                          | 65%                    | exclusive   |
| 13.   | 15                          | 61%                    | exclusive   |
| 14.   | 20                          | 59%                    | exclusive   |

<sup>a</sup>yield and selectivity are based on <sup>1</sup>H NMR of the crude reaction mixture using 1,3,5-trimethoxybenzene as internal standard

**Table S2: Aryl iodide loading**

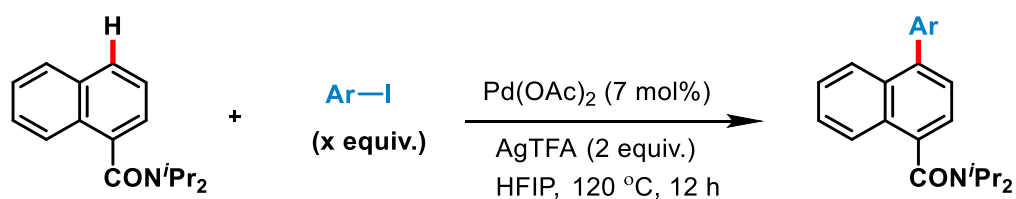

| Entry | Aryl iodide (mol%) | Yield (%) <sup>a</sup> | Selectivity |
|-------|--------------------|------------------------|-------------|
| 1.    | 1                  | 65%                    | exclusive   |
| 2.    | 1.2                | 73%                    | exclusive   |
| 3.    | 1.5                | 70%                    | exclusive   |
| 4.    | 1.8                | 67%                    | exclusive   |
| 5.    | 2                  | 61%                    | exclusive   |

<sup>a</sup>yield and selectivity are based on <sup>1</sup>H NMR of the crude reaction mixture using 1,3,5-trimethoxybenzene as internal standard

**Table S3: Silver salt optimization**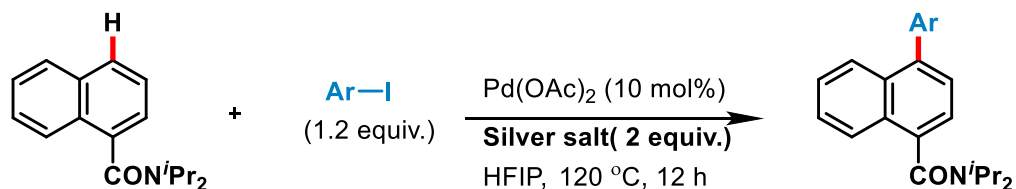

| Entry     | Silver salt                     | Yield (%) <sup>a</sup> | Selectivity      |
|-----------|---------------------------------|------------------------|------------------|
| 1.        | Ag <sub>2</sub> CO <sub>3</sub> | nd                     | -                |
| 2.        | AgOAc                           | nd                     | -                |
| <b>3.</b> | <b>AgTFA</b>                    | <b>73%</b>             | <b>exclusive</b> |
| 4.        | Ag <sub>2</sub> O               | 12%                    | exclusive        |
| 5.        | AgNO <sub>2</sub>               | trace                  | -                |
| 6.        | AgNO <sub>3</sub>               | trace                  | -                |
| 7.        | AgPF <sub>6</sub>               | 23%                    | exclusive        |
| 8.        | AgOTf                           | 51%                    | exclusive        |
| 9.        | AgSbF <sub>6</sub>              | 26%                    | exclusive        |
| 10.       | AgBF <sub>4</sub>               | 37%                    | exclusive        |
| 11.       | Ag <sub>3</sub> PO <sub>4</sub> | 45%                    | exclusive        |

<sup>a</sup>yield and selectivity are based on <sup>1</sup>H NMR of the crude reaction mixture using 1,3,5-trimethoxybenzene as internal standard

**Table S4: Silver salt loading:**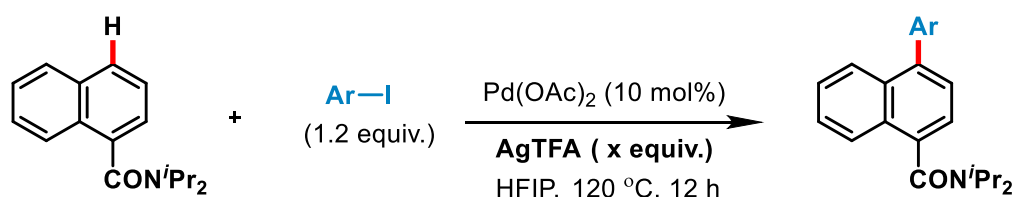

| Entry     | AgTFA(equiv.) | Yield (%) <sup>a</sup> | Selectivity |
|-----------|---------------|------------------------|-------------|
| 1.        | 0             | -                      | -           |
| 2.        | 0.2           | 30%                    | exclusive   |
| 3.        | 0.5           | 45%                    | exclusive   |
| 4.        | 0.8           | 51%                    | exclusive   |
| 5.        | 1.0           | 64%                    | exclusive   |
| 6.        | 1.2           | 74%                    | exclusive   |
| <b>7.</b> | <b>1.5</b>    | <b>89%</b>             | exclusive   |

|    |     |     |           |
|----|-----|-----|-----------|
| 8. | 1.7 | 77% | exclusive |
| 9. | 2   | 79% | exclusive |

<sup>a</sup>yield and selectivity are based on <sup>1</sup>H NMR of the crude reaction mixture using 1,3,5-trimethoxybenzene as internal standard

**Table S5: Solvent optimization**

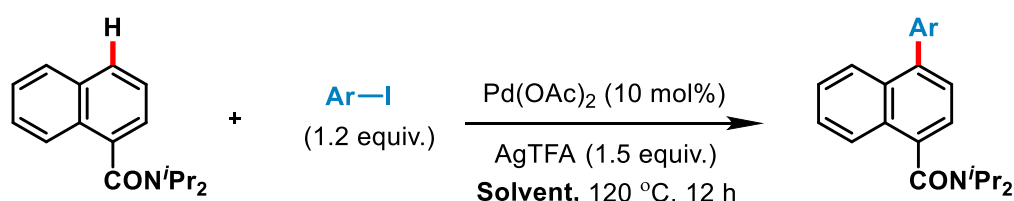

| Entry | Solvent(1 ml)    | Yield (%) <sup>a</sup> | Selecvtity |
|-------|------------------|------------------------|------------|
| 1.    | DCE              | 23%                    | exclusive  |
| 2.    | DCM              | 26%                    | exclusive  |
| 3.    | TFT              | 45%                    | exclusive  |
| 4.    | TFE              | 65%                    | exclusive  |
| 5.    | Chlorobenzene    | 31%                    | exclusive  |
| 6.    | Toluene          | nd                     | -          |
| 7.    | Isopropanol      | nd                     | -          |
| 8.    | Methanol         | nd                     | -          |
| 9.    | Ethanol          | nd                     | -          |
| 10.   | HFIP             | 89%                    | exclusive  |
| 11.   | Acetonitrile     | nd                     | -          |
| 12.   | Fluorobenzene    | 12%                    | exclusive  |
| 13.   | CCl <sub>4</sub> | 20%                    | exclusive  |
| 14.   | THF              | nd                     | -          |
| 15.   | Diethylether     | 35%                    | exclusive  |
| 16.   | TBME             | 17%                    | exclusive  |
| 17.   | 1,4-dioxane      | 45%                    | exclusive  |
| 18.   | Isoamyl alcohol  | nd                     | -          |

<sup>a</sup>yield and selectivity are based on <sup>1</sup>H NMR of the crude reaction mixture using 1,3,5-trimethoxybenzene as internal standard

**Table S6: Temperature optimization**

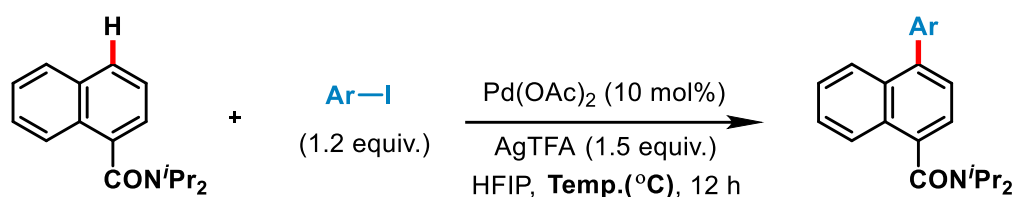

| Entry | Temperature( °C) | Yield (%) <sup>a</sup> | Selectivity |
|-------|------------------|------------------------|-------------|
| 1.    | rt               | nd                     | exclusive   |
| 2.    | 40               | nd                     | exclusive   |
| 3.    | 50               | 20%                    | exclusive   |
| 4.    | 60               | 49%                    | exclusive   |
| 5.    | 70               | 55%                    | exclusive   |
| 6.    | 80               | 69%                    | exclusive   |
| 7.    | 90               | 81%                    | exclusive   |
| 8.    | 100              | 95%                    | exclusive   |
| 9.    | 120              | 89%                    | exclusive   |
| 10.   | 130              | 84%                    | exclusive   |
| 11.   | 140              | 85%                    | exclusive   |

<sup>a</sup>yield and selectivity are based on <sup>1</sup>H NMR of the crude reaction mixture using 1,3,5-trimethoxybenzene as internal standard

**Table S7: Time optimization**

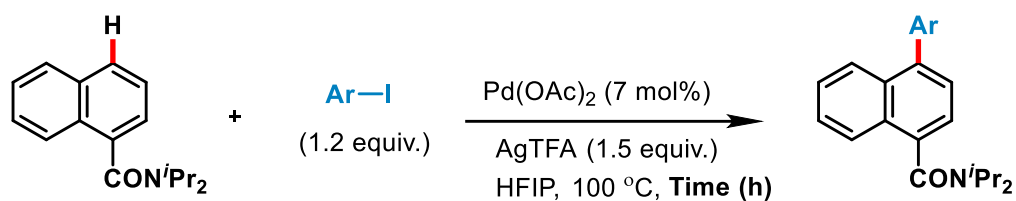

| Entry | Time (h) | Yield (%) <sup>a</sup> | Selectivity |
|-------|----------|------------------------|-------------|
| 1.    | 2        | 45%                    | exclusive   |
| 2.    | 4        | 50%                    | exclusive   |
| 3.    | 6        | 52%                    | exclusive   |
| 4.    | 8        | 55%                    | exclusive   |
| 5.    | 10       | 69%                    | exclusive   |
| 6.    | 12       | 71%                    | exclusive   |
| 7.    | 14       | 76%                    | exclusive   |
| 8.    | 16       | 81%                    | exclusive   |
| 9.    | 18       | 83%                    | exclusive   |
| 10.   | 20       | 89%                    | exclusive   |
| 11.   | 24       | 95%                    | exclusive   |

<sup>a</sup>yield and selectivity are based on <sup>1</sup>H NMR of the crude reaction mixture using 1,3,5-trimethoxybenzene as internal standard

**General procedure B for *para*-arylation of  $\alpha$ -naphthamide:** An oven-dried screw cap reaction tube was charged with a magnetic stir-bar, Pd(OAc)<sub>2</sub> (10 mol% 2.24 mg for 0.2 mmol), AgTFA (1.5 equiv., 33mg),  $\alpha$ -naphthamide (0.1 mmol, 25.5 mg) and aryl iodide (1.2 equiv., 0.12 mmol). Then 1 mL of HFIP was added. The reaction mixture was stirred vigorously on a preheated oil bath at 120 °C along. The reaction was carried out for 12 h and the reaction mixture was diluted with EtOAc and filtered through a celite pad. The desired arylation product was isolated by column chromatography using silica gel (100-200 mesh size) and petroleum ether/ethyl acetate as the eluent.

### Characterization of *p*-arylated $\alpha$ -naphthamide

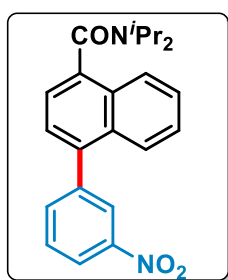

***N,N*-diisopropyl-4-(3-nitrophenyl)-1-naphthamide:** Compound **3a** was prepared by general procedure B

**Eluent:** petroleum ether/ethyl acetate (80/20, v/v).

**Physical State:** White solid.

**Yield:** 73%

**<sup>1</sup>H NMR (400 MHz, CDCl<sub>3</sub>)**  $\delta$  8.38 (s, 1H), 8.32 (d, J = 8.2 Hz, 1H), 7.95 (d, J = 8.3 Hz, 1H), 7.83 (d, J = 7.5 Hz, 1H), 7.77 (d, J = 8.4 Hz, 1H), 7.68 (t, J = 7.9 Hz, 1H), 7.56 (t, J = 7.5 Hz, 1H), 7.53 – 7.46 (m, 1H), 7.41 (q, J = 7.2 Hz, 2H), 3.71 (dt, J = 13.8, 6.8 Hz, 1H), 3.63 (dd, J = 13.6, 6.8 Hz, 1H), 1.75 (d, J = 6.8 Hz, 3H), 1.68 (d, J = 6.5 Hz, 5H), 1.14 (d, J = 6.6 Hz, 3H), 1.10 (d, J = 6.7 Hz, 3H).

**<sup>13</sup>C NMR (126 MHz, CDCl<sub>3</sub>)**  $\delta$  169.70 (s), 148.30 (s), 142.03 (s), 137.73 (s), 137.38 (s), 136.15 (s), 131.33 (s), 129.92 (s), 129.33 (s), 127.14 (s), 126.97 (s), 126.68 (s), 125.51 (d, J = 3.2 Hz), 124.83 (s), 122.45 (s), 121.53 (s), 77.25 (s), 77.00 (s), 76.75 (s), 51.21 (s), 46.12 (s), 21.01 – 20.55 (m).

**HRMS (*m/z*):** [M+Na<sup>+</sup>] calcd for C<sub>23</sub>H<sub>24</sub>N<sub>2</sub>NaO<sub>3</sub>: 399.45; found, 399.1679

**TLC:** R<sub>f</sub> = 0.4 (80:20 petroleum ether:EtOAc).

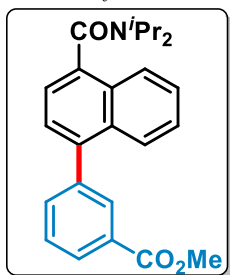

**Methyl 3-(4-(diisopropylcarbamoyl)naphthalen-1-yl)benzoate:** Compound **3b** was prepared by general procedure B

**Eluent:** petroleum ether/ethyl acetate (80/20, v/v).

**Physical State:** White solid.

**Yield:** 81%

**<sup>1</sup>H NMR (500 MHz, CDCl<sub>3</sub>)** δ 8.17 (s, 1H), 8.12 (d, *J* = 7.8 Hz, 1H), 7.92 (d, *J* = 8.3 Hz, 1H), 7.82 (d, *J* = 8.5 Hz, 1H), 7.68 (d, *J* = 7.6 Hz, 1H), 7.58 (t, *J* = 7.7 Hz, 1H), 7.53 (t, *J* = 7.5 Hz, 1H), 7.49 – 7.42 (m, 1H), 7.39 (dd, *J* = 15.8, 7.1 Hz, 2H), 3.94 (s, 3H), 3.76 – 3.67 (m, 1H), 3.67 – 3.58 (m, *J* = 13.4, 6.8 Hz, 1H), 1.74 (d, *J* = 6.8 Hz, 4H), 1.67 (d, *J* = 6.8 Hz, 3H), 1.13 (d, *J* = 6.6 Hz, 3H), 1.08 (t, *J* = 8.4 Hz, 3H).

**<sup>13</sup>C NMR (126 MHz, CDCl<sub>3</sub>)** δ 170.05 (s), 166.99 (s), 140.62 (s), 139.34 (s), 136.57 (s), 134.50 (s), 131.61 (s), 131.02 (s), 130.30 (s), 129.85 (s), 128.63 (s), 128.43 (s), 126.68 (d, *J* = 2.6 Hz), 126.46 (s), 126.04 (s), 125.28 (s), 121.57 (s), 77.25 (s), 77.15 – 76.89 (m), 76.75 (s), 52.21 (s), 51.18 (s), 46.07 (s), 29.67 (s), 20.96 – 20.54 (m).

**HRMS (*m/z*):** [M+H<sup>+</sup>] calcd for C<sub>25</sub>H<sub>28</sub>NO<sub>3</sub>: 399.20; found, 390.2069

**TLC:** R<sub>f</sub> = 0.35 (80:20 petroleum ether:EtOAc).

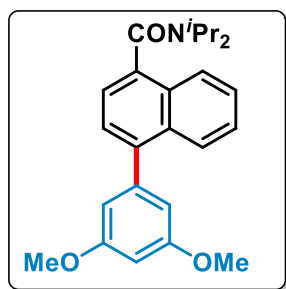

**4-(3,5-dimethoxyphenyl)-N,N-diisopropyl-1-naphthamide:** Compound **3c** was prepared by general procedure B

**Eluent:** petroleum ether/ethyl acetate (80/20, v/v).

**Physical State:** White solid.

**Yield:** 65%

**<sup>1</sup>H NMR (500 MHz, CDCl<sub>3</sub>)** δ 7.97 (d, *J* = 8.5 Hz, 1H), 7.90 (d, *J* = 8.3 Hz, 1H), 7.51 (t, *J* = 7.5 Hz, 1H), 7.44 (t, *J* = 7.6 Hz, 1H), 7.41 (d, *J* = 7.1 Hz, 1H), 7.34 (d, *J* = 7.1 Hz, 1H), 6.64 (s, 2H), 6.55 (s, 1H), 3.84 (s, 6H), 3.74 (dt, *J* = 13.2, 6.6 Hz, 1H), 3.67 – 3.58 (m, 1H), 1.75 (d, *J* = 6.8 Hz, 3H), 1.67 (d, *J* = 6.8 Hz, 3H), 1.12 (t, *J* = 7.1 Hz, 3H), 1.09 (d, *J* = 6.6 Hz, 3H).

**<sup>13</sup>C NMR (126 MHz, CDCl<sub>3</sub>)** δ 170.10 (s), 160.56 (s), 142.41 (s), 140.41 (s), 136.36 (s), 131.73 (s), 129.84 (s), 126.65 – 126.30 (m), 125.95 (s), 125.18 (s), 121.49 (s), 108.19 (s), 99.57 (s), 55.44 (s), 51.11 (s), 46.02 (s), 20.92 (s), 20.72 (d, *J* = 7.2 Hz).

**HRMS (*m/z*):** [M+H<sup>+</sup>] calcd for C<sub>25</sub>H<sub>30</sub>NO<sub>3</sub>: 392.2224; found, 392.2220

**TLC:** R<sub>f</sub> = 0.05 (80:20 petroleum ether:EtOAc).

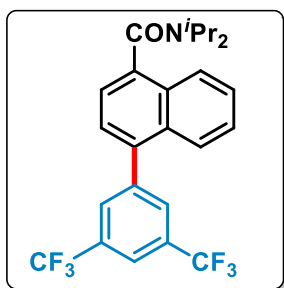

**4-(3,5-bis(trifluoromethyl)phenyl)-N,N-diisopropyl-1-naphthamide:** Compound **3d** was prepared by general procedure B

**Eluent:** petroleum ether/ethyl acetate (80/20, v/v).

**Physical State:** White solid.

**Yield:** 65%

**<sup>1</sup>H NMR (400 MHz, CDCl<sub>3</sub>)** δ 8.00 – 7.93 (m, 4H), 7.70 (d, *J* = 7.8 Hz, 1H), 7.58 (t, 1H), 7.53 (t, *J* = 11.1, 4.1 Hz, 1H), 7.46 – 7.38 (m, 2H), 3.66 (ddd, *J* = 20.6, 13.6, 6.8 Hz, 2H), 1.75 (d, *J* = 6.8 Hz, 3H), 1.68 (d, *J* = 6.9 Hz, 4H), 1.13 (d, *J* = 6.7 Hz, 3H), 1.09 (d, *J* = 6.7 Hz, 3H).

**<sup>13</sup>C NMR (101 MHz, CDCl<sub>3</sub>)** δ 169.57 (s), 142.45 (s), 137.71 (s), 137.11 (s), 131.23 (s), 130.14 (s), 129.93 (s), 127.41 (s), 127.10 (s), 126.83 (s), 125.61 (s), 125.22 (s), 121.50 (s), 51.22 (s), 46.15 (s), 21.20 – 20.53 (m).

**<sup>19</sup>F NMR (471 MHz, CDCl<sub>3</sub>)** δ -62.69 (s).

**HRMS (*m/z*):** [M+H<sup>+</sup>] calcd for C<sub>25</sub>H<sub>24</sub>F<sub>6</sub>NO: 468.1716; found, 468.1719

**TLC:** R<sub>f</sub> = 0.02 (80:20 petroleum ether:EtOAc).

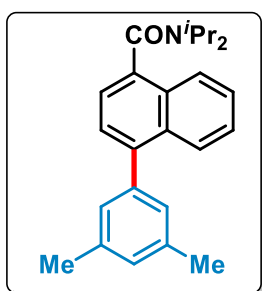

**4-(3,5-dimethylphenyl)-N,N-diisopropyl-1-naphthamide:** Compound **3e** was prepared by general procedure B

**Eluent:** petroleum ether/ethyl acetate (80/20, v/v).

**Physical State:** White solid.

**Yield:** 57%

**<sup>1</sup>H NMR (500 MHz, CDCl<sub>3</sub>)** δ 7.92 (dd, *J* = 15.8, 8.4 Hz, 4H), 7.51 (t, *J* = 7.5 Hz, 2H), 7.44 (t, *J* = 7.6 Hz, 2H), 7.41 – 7.32 (m, 4H), 7.11 (s, 4H), 7.08 (s, 2H), 3.78 – 3.68 (m, 2H), 3.63 (dq, *J* = 13.5, 6.7 Hz, 2H), 2.41 (s, 12H), 1.74 (dd, *J* = 14.9, 6.4 Hz, 6H), 1.68 (d, *J* = 6.8 Hz, 7H), 1.09 (dt, *J* = 18.8, 9.4 Hz, 12H).

**<sup>13</sup>C NMR (126 MHz, CDCl<sub>3</sub>)** δ 170.24 (s), 140.77 (s), 140.27 (s), 137.76 (s), 136.00 (s), 131.86 (s), 129.85 (s), 128.97 (s), 127.83 (s), 126.57 (s), 126.39 (s), 126.17 (d, *J* = 16.1 Hz), 125.14 (s), 121.56 (s), 51.10 (s), 46.00 (s), 21.34 (s), 20.74 (dd, *J* = 19.3, 11.2 Hz).

**HRMS (*m/z*):** [M+Na<sup>+</sup>] calcd for C<sub>25</sub>H<sub>29</sub>NNaO: 382.2142; found, 382.2141

**TLC:** R<sub>f</sub> = 0.05 (80:20 petroleum ether:EtOAc).

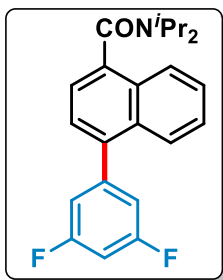

**4-(3,5-difluorophenyl)-N,N-diisopropyl-1-naphthamide:** Compound **3f** was prepared by general procedure B

**Eluent:** petroleum ether/ethyl acetate (80/20, v/v).

**Physical State:** White solid.

**Yield:** 88%

**<sup>1</sup>H NMR (500 MHz, CDCl<sub>3</sub>)**  $\delta$  7.92 (d,  $J$  = 8.3 Hz, 1H), 7.85 (d,  $J$  = 7.7 Hz, 1H), 7.54 (t,  $J$  = 7.3 Hz, 1H), 7.49 (t,  $J$  = 7.6 Hz, 1H), 7.37 (q,  $J$  = 7.2 Hz, 2H), 7.03 (dd,  $J$  = 8.0, 2.0 Hz, 2H), 6.90 (td,  $J$  = 9.0, 2.2 Hz, 1H), 3.75 – 3.67 (m,  $J$  = 13.4, 6.7 Hz, 1H), 3.67 – 3.58 (m,  $J$  = 14.1, 7.0 Hz, 1H), 1.74 (d,  $J$  = 6.7 Hz, 3H), 1.67 (d,  $J$  = 6.8 Hz, 3H), 1.12 (t,  $J$  = 6.8 Hz, 3H), 1.09 (d,  $J$  = 6.7 Hz, 3H).

**<sup>13</sup>C NMR (126 MHz, CDCl<sub>3</sub>)**  $\delta$  169.76 (s), 163.85 (s), 137.18 (s), 131.26 (s), 129.88 (s), 126.89 (d,  $J$  = 10.4 Hz), 126.26 (s), 125.73 (s), 125.41 (s), 121.44 (s), 113.07 (d,  $J$  = 24.8 Hz), 112.93 – 112.65 (m), 102.89 (s), 51.16 (s), 46.09 (s), 20.90 (s), 20.90 – 20.56 (m).

**<sup>19</sup>F NMR (471 MHz, CDCl<sub>3</sub>)**  $\delta$  -109.97 (s).

**HRMS ( $m/z$ ):** [M+H<sup>+</sup>] calcd for C<sub>23</sub>H<sub>24</sub>F<sub>2</sub>NO: 368.1781; found, 368.1783

**TLC:** R<sub>f</sub> = 0.05 (80:20 petroleum ether:EtOAc).

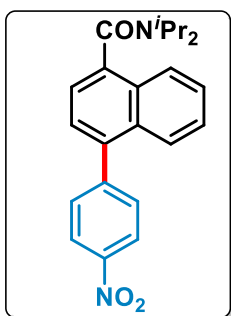

**N,N-diisopropyl-4-(4-nitrophenyl)-1-naphthamide:** Compound **3g** was prepared by general procedure B

**Eluent:** petroleum ether/ethyl acetate (80/20, v/v).

**Physical State:** Pale yellow solid .

**Yield:** 95%

**<sup>1</sup>H NMR (500 MHz, CDCl<sub>3</sub>)**  $\delta$  8.35 (dd,  $J$  = 16.3, 8.7 Hz, 1H), 7.94 (d,  $J$  = 8.3 Hz, 1H), 7.79 (d,  $J$  = 8.5 Hz, 1H), 7.67 (d,  $J$  = 8.5 Hz, 1H), 7.56 (q,  $J$  = 7.4 Hz, 1H), 7.49 (dd,  $J$  = 13.2, 6.0 Hz, 1H), 7.44 – 7.36 (m, 1H), 3.72 (dq,  $J$  = 13.4, 6.7 Hz, 1H), 3.63 (dq,  $J$  = 13.5, 6.8 Hz, 1H), 1.75 (d,  $J$  = 6.8 Hz, 2H), 1.67 (d,  $J$  = 6.8 Hz, 2H), 1.14 (d,  $J$  = 6.7 Hz, 2H), 1.10 (d,  $J$  = 6.7 Hz, 2H).

**<sup>13</sup>C NMR (126 MHz, CDCl<sub>3</sub>)**  $\delta$  169.67 (s), 147.23 (s), 137.75 (d,  $J$  = 61.8 Hz), 131.18 (s), 130.93 (s), 129.92 (s), 127.14 (s), 127.00 (s), 126.52 (s), 125.55 (d,  $J$  = 7.6 Hz), 123.62 (s), 121.50 (s), 51.21 (s), 46.14 (s), 20.88 (s), 20.71 (s), 20.65 (s).

**HRMS ( $m/z$ ):** [M+Na<sup>+</sup>] calcd for C<sub>23</sub>H<sub>24</sub>N<sub>2</sub>NaO<sub>3</sub>: 399.45; found, 399.1679

**TLC:** R<sub>f</sub> = 0.4 (80:20 petroleum ether:EtOAc).

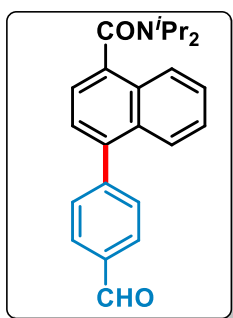

**4-(4-formylphenyl)-N,N-diisopropyl-1-naphthamide:** Compound **3h** was prepared by general procedure B

**Eluent:** petroleum ether/ethyl acetate (80/20, v/v).

**Physical State:** Pale yellow solid .

**Yield:** 75%

**<sup>1</sup>H NMR (500 MHz, CDCl<sub>3</sub>)**  $\delta$  10.13 (s, 1H), 8.02 (d,  $J$  = 7.9 Hz, 2H), 7.95 – 7.92 (m,  $J$  = 8.2 Hz, 1H), 7.84 (d,  $J$  = 8.4 Hz, 1H), 7.68 (d,  $J$  = 7.9 Hz, 2H), 7.55 (t, 1H), 7.47 (t, 1H), 7.40 (dd,  $J$  = 16.8, 7.2 Hz, 2H), 3.78 – 3.68 (m, 1H), 3.67 – 3.60 (m,  $J$  = 13.5, 6.8 Hz, 1H), 1.75 (d,  $J$  = 6.8 Hz, 3H), 1.68 (d,  $J$  = 6.8 Hz, 4H), 1.14 (d,  $J$  = 6.7 Hz, 3H), 1.10 (d,  $J$  = 6.8 Hz, 3H).

**<sup>13</sup>C NMR (126 MHz, CDCl<sub>3</sub>)**  $\delta$  191.99 (s), 169.85 (s), 146.83 (s), 139.05 (s), 137.11 (s), 135.42 (s), 131.34 (s), 130.77 (s), 129.84 (d,  $J$  = 20.9 Hz), 129.63 – 129.52 (m), 126.86 (d,  $J$  = 5.6 Hz), 126.41 (s), 125.89 (s), 125.42 (s), 121.54 (s), 51.19 (s), 46.11 (s), 21.13 – 20.92 (m), 20.92 – 20.49 (m).

**HRMS ( $m/z$ ):** [M+H<sup>+</sup>] calcd for C<sub>24</sub>H<sub>26</sub>NO<sub>2</sub>: 360.1919; found, 399.1924

**TLC:** R<sub>f</sub> = 0.3 (80:20 petroleum ether:EtOAc).

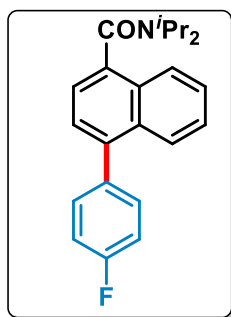

**4-(4-fluorophenyl)-N,N-diisopropyl-1-naphthamide:** Compound **3i** was prepared by general procedure B

**Eluent:** petroleum ether/ethyl acetate (80/20, v/v).

**Physical State:** White solid.

**Yield:** 69%

**<sup>1</sup>H NMR (500 MHz, CDCl<sub>3</sub>)**  $\delta$  7.91 (t,  $J$  = 12.8 Hz, 8H), 7.86 (d,  $J$  = 8.4 Hz, 10H), 7.54 – 7.49 (m, 9H), 7.46 (dd,  $J$  = 17.8, 9.8 Hz, 25H), 7.41 – 7.33 (m, 16H), 7.18 (t,  $J$  = 8.6 Hz, 15H), 3.78 – 3.70 (m, 8H), 3.66 – 3.59 (m, 11H), 1.75 (d,  $J$  = 6.8 Hz, 24H), 1.68 (d,  $J$  = 6.9 Hz, 23H), 1.13 (d,  $J$  = 6.6 Hz, 24H), 1.09 (d,  $J$  = 6.7 Hz, 27H).

**<sup>13</sup>C NMR (126 MHz, CDCl<sub>3</sub>)**  $\delta$  170.04 (s), 139.36 (s), 136.31 (d,  $J$  = 13.2 Hz), 131.80 (s), 131.53 (d,  $J$  = 7.9 Hz), 129.88 (s), 128.22 (s), 126.71 – 126.02 (m), 125.26 (s), 124.86 (s), 121.54 (s), 115.28 (s), 115.11 (s), 77.25 (s), 77.12 – 76.90 (m), 76.75 (s), 51.11 (s), 46.02 (s), 21.00 – 20.48 (m).

**HRMS ( $m/z$ ):**  $[M+H^+]$  calcd for  $C_{23}H_{25}FNO$ : 350.1875; found, 3350.1878

**TLC:**  $R_f = 0.05$  (80:20 petroleum ether:EtOAc).

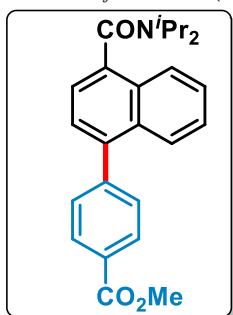

**Methyl 4-(4-(diisopropylcarbamoyl)naphthalen-1-yl)benzoate:** Compound **3j** was prepared by general procedure B

**Eluent:** petroleum ether/ethyl acetate (80/20, v/v).

**Physical State:** White solid.

**Yield:** 71%

**$^1H$  NMR (400 MHz,  $CDCl_3$ )  $\delta$**  8.17 (d,  $J = 8.1$  Hz, 1H), 7.92 (d,  $J = 8.2$  Hz, 1H), 7.85 (d,  $J = 8.4$  Hz, 1H), 7.57 (t,  $J = 6.4$  Hz, 1H), 7.52 (d,  $J = 7.9$  Hz, 1H), 7.49 – 7.43 (t, 1H), 7.39 (q,  $J = 7.1$  Hz, 1H), 3.98 (s, 1H), 3.73 (m,  $J = 13.3, 6.6$  Hz, 1H), 3.63 (m,  $J = 13.4, 6.7$  Hz, 1H), 1.75 (d,  $J = 6.8$  Hz, 1H), 1.67 (d,  $J = 6.8$  Hz, 2H), 1.13 (d,  $J = 6.6$  Hz, 1H), 1.09 (d,  $J = 6.6$  Hz, 1H).

**$^{13}C$  NMR (101 MHz,  $CDCl_3$ )  $\delta$**  169.94 (s), 166.99 (s), 145.17 (s), 139.37 (s), 136.87 (s), 131.46 (s), 130.11 (s), 129.91 (s), 129.60 (s), 129.20 (s), 126.73 (s), 126.34 (s), 126.03 (s), 125.36 (s), 121.54 (s), 52.21 (s), 51.16 (s), 46.08 (s), 20.90 (s), 20.74 (s), 20.68 (s).

**HRMS ( $m/z$ ):**  $[M+H^+]$  calcd for  $C_{25}H_{28}NO_3$ : 399.20; found, 390.2069

**TLC:**  $R_f = 0.35$  (80:20 petroleum ether:EtOAc).

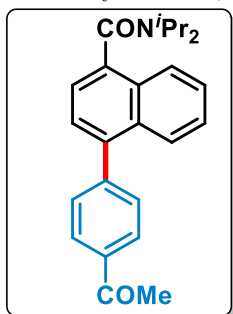

**4-(4-acetylphenyl)-N,N-diisopropyl-1-naphthamide:** Compound **3k** was prepared by general procedure B

**Eluent:** petroleum ether/ethyl acetate (80/20, v/v).

**Physical State:** Pale yellow solid .

**Yield:** 89%

**$^1H$  NMR (400 MHz,  $CDCl_3$ )  $\delta$**  8.09 (d,  $J = 8.2$  Hz, 1H), 7.93 (d,  $J = 8.2$  Hz, 1H), 7.85 (d,  $J = 8.4$  Hz, 1H), 7.60 (d,  $J = 8.1$  Hz, 1H), 7.54 (t,  $J = 7.2$  Hz, 1H), 7.46 (t,  $J = 7.3$  Hz, 1H), 7.39 (q,  $J = 7.2$  Hz, 1H), 3.78 – 3.68 (m, 1H), 3.63 (dt,  $J = 13.5, 6.8$  Hz, 1H), 2.69 (s, 1H), 1.75 (d,  $J = 6.8$  Hz, 1H), 1.67 (d,  $J = 6.8$  Hz, 2H), 1.13 (d,  $J = 6.6$  Hz, 1H), 1.09 (d,  $J = 6.7$  Hz, 1H).

**$^{13}C$  NMR (101 MHz,  $CDCl_3$ )  $\delta$**  197.84 (s), 169.91 (s), 145.38 (s), 139.26 (s), 136.93 (s), 136.12 (s), 131.43 (s), 130.31 (s), 129.92 (s), 128.38 (s), 126.76 (s), 126.33 (s), 125.99 (s), 125.38 (s), 121.55 (s), 51.17 (s), 46.09 (s), 26.71 (s), 20.90 (s), 20.74 (s), 20.68 (s).

**HRMS ( $m/z$ ):**  $[M+Na^+]$  calcd for  $C_{23}H_{24}N_2NaO_3$ : 399.1679; found, 399.1679

**TLC:**  $R_f = 0.4$  (80:20 petroleum ether:EtOAc).

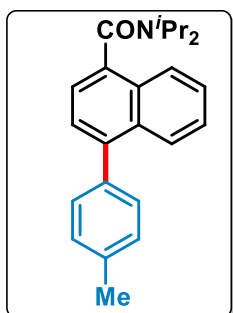

***N,N*-diisopropyl-4-(*p*-tolyl)-1-naphthamide:** Compound **3l** was prepared by general procedure B

**Eluent:** petroleum ether/ethyl acetate (80/20, v/v).

**Physical State:** Pale yellow liquid.

**Yield:** 65%

**$^1\text{H}$  NMR (400 MHz,  $\text{CDCl}_3$ )  $\delta$**  7.93 (d,  $J = 8.5$  Hz, 1H), 7.89 (t,  $J = 7.8$  Hz, 1H), 7.50 (t,  $J = 7.5$  Hz, 1H), 7.46 – 7.41 (m, 1H), 7.38 (t,  $J = 8.2$  Hz, 4H), 7.32 (t,  $J = 8.0$  Hz, 3H), 3.80 – 3.70 (m, 1H), 3.66 – 3.58 (m,  $J = 13.7, 6.8$  Hz, 1H), 2.46 (s, 3H), 1.75 (d,  $J = 6.8$  Hz, 3H), 1.66 (d, 4H), 1.12 (d,  $J = 6.7$  Hz, 3H), 1.08 (d,  $J = 6.6$  Hz, 3H).

**$^{13}\text{C}$  NMR (101 MHz,  $\text{CDCl}_3$ )  $\delta$**  170.29 (s), 140.56 (s), 137.44 (s), 137.12 (s), 135.93 (s), 131.92 (s), 129.92 (s), 128.99 (s), 126.36 (dd,  $J = 21.2, 4.5$  Hz), 125.18 (s), 121.66 (s), 51.14 (s), 46.06 (s), 29.68 (s), 21.23 (s), 21.02 – 20.52 (m).

**HRMS ( $m/z$ ):**  $[\text{M}+\text{H}^+]$  calcd for  $\text{C}_{24}\text{H}_{27}\text{NO}$ : 346.2126; found, 346.2128

**TLC:**  $R_f = 0.4$  (80:20 petroleum ether:EtOAc).

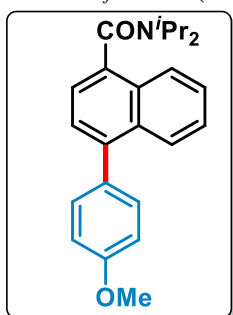

***N,N*-diisopropyl-4-(4-methoxyphenyl)-1-naphthamide:** Compound **3m** was prepared by general procedure B

**Eluent:** petroleum ether/ethyl acetate (80/20, v/v).

**Physical State:** white solid.

**Yield:** 59%

**$^1\text{H}$  NMR (500 MHz,  $\text{CDCl}_3$ )  $\delta$**  7.93 (dd,  $J = 16.5, 8.4$  Hz, 2H), 7.51 (t,  $J = 7.4$  Hz, 1H), 7.43 (dd,  $J = 11.4, 8.3$  Hz, 3H), 7.40 – 7.33 (m, 2H), 7.04 (d,  $J = 8.6$  Hz, 2H), 3.89 (s, 3H), 3.80 – 3.72 (m, 1H), 3.63 (dq,  $J = 13.6, 6.7$  Hz, 1H), 1.75 (d,  $J = 6.8$  Hz, 3H), 1.68 (d,  $J = 6.8$  Hz, 3H), 1.12 (d,  $J = 6.6$  Hz, 3H), 1.09 (d,  $J = 6.7$  Hz, 3H).

**$^{13}\text{C}$  NMR (126 MHz,  $\text{CDCl}_3$ )  $\delta$**  170.25 (s), 159.02 (s), 140.16 (s), 135.86 (s), 132.68 (s), 131.97 (s), 131.07 (s), 129.92 (s), 126.41 (d,  $J = 3.0$  Hz), 126.24 (s), 125.16 (s), 121.61 (s), 113.71 (s), 77.25 (s), 77.00 (s), 76.75 (s), 55.31 (s), 51.10 (s), 45.99 (s), 20.72 (dd,  $J = 18.8, 11.7$  Hz).

**HRMS ( $m/z$ ):**  $[\text{M}+\text{H}^+]$  calcd for  $\text{C}_{24}\text{H}_{28}\text{NO}_2$ : 364.21; found, 364.2186

**TLC:**  $R_f = 0.2$  (80:20 petroleum ether:EtOAc).

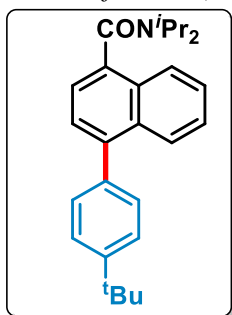

**4-(4-(tert-butyl)phenyl)-N,N-diisopropyl-1-naphthamide:** Compound **3n** was prepared by general procedure B

**Eluent:** petroleum ether/ethyl acetate (80/20, v/v).

**Physical State:** yellowish liquid.

**Yield:** 81%

**<sup>1</sup>H NMR (500 MHz, CDCl<sub>3</sub>)**  $\delta$  7.98 (d,  $J = 8.5$  Hz, 1H), 7.91 (d,  $J = 8.3$  Hz, 1H), 7.59 (dt,  $J = 14.9, 7.2$  Hz, 3H), 7.52 (d,  $J = 8.1$  Hz, 3H), 7.44 (t,  $J = 5.8$  Hz, 2H), 3.76 (dq,  $J = 13.2, 6.6$  Hz, 1H), 3.61 (dt,  $J = 13.8, 6.9$  Hz, 1H), 1.75 (d,  $J = 6.8$  Hz, 3H), 1.67 (d,  $J = 6.1$  Hz, 3H), 1.42 (s, 9H), 1.13 (d,  $J = 6.6$  Hz, 3H), 1.09 (d,  $J = 6.5, 2.7$  Hz, 3H).

**<sup>13</sup>C NMR (126 MHz, CDCl<sub>3</sub>)**  $\delta$  170.23 (s), 150.27 (s), 140.47 (s), 137.35 (s), 135.98 (s), 131.88 (s), 129.91 (s), 129.67 (s), 129.36 (s), 127.80 (s), 127.52 (s), 126.56 (s), 126.40 (s), 126.25 (d,  $J = 7.1$  Hz), 125.18 (s), 122.37 (s), 121.61 (s), 51.09 (s), 46.03 (d,  $J = 11.7$  Hz), 34.60 (s), 31.41 (s), 20.92 (s), 20.73 (s), 20.67 (d,  $J = 3.5$  Hz).

**HRMS ( $m/z$ ):**  $[M+Na^+]$  calcd for C<sub>27</sub>H<sub>33</sub>NNaO: 410.2455; found, 410.2454

**TLC:**  $R_f = 0.1$  (80:20 petroleum ether:EtOAc).

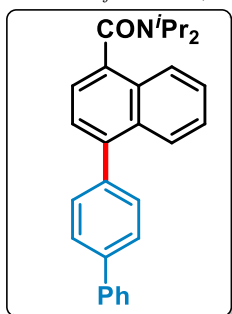

**4-([1,1'-biphenyl]-4-yl)-N,N-diisopropyl-1-naphthamide:** Compound **3o** was prepared by general procedure B

**Eluent:** petroleum ether/ethyl acetate (80/20, v/v).

**Physical State:** White solid.

**Yield:** 73%

**<sup>1</sup>H NMR (500 MHz, CDCl<sub>3</sub>)**  $\delta$  8.03 – 7.98 (m,  $J = 8.4$  Hz, 1H), 7.94 (d,  $J = 8.3$  Hz, 1H), 7.74 (d,  $J = 8.1$  Hz, 2H), 7.70 (d,  $J = 7.4$  Hz, 2H), 7.58 (d,  $J = 8.0$  Hz, 2H), 7.56 – 7.44 (m, 5H), 7.39 (t,  $J = 6.8$  Hz, 2H), 3.82 – 3.72 (m,  $J = 13.2, 6.6$  Hz, 1H), 3.72 – 3.59 (m, 1H), 1.75 (d,  $J = 10.5$  Hz, 3H), 1.69 (d,  $J = 6.8$  Hz, 3H), 1.14 (d,  $J = 6.6$  Hz, 3H), 1.10 (d,  $J = 6.7$  Hz, 3H).

**<sup>13</sup>C NMR (126 MHz, CDCl<sub>3</sub>)**  $\delta$  170.14 (s), 140.26 (s), 140.08 (s), 139.35 (s), 136.31 (s), 131.80 (s), 130.47 (s), 129.95 (s), 128.84 (s), 127.40 (s), 127.11 (s), 127.01 (s), 126.54 (s), 126.42 (d,  $J = 4.3$  Hz), 126.33 (s), 125.26 (s), 51.13 (s), 46.03 (s), 20.92 (s), 20.75 (s), 20.69 (s).

**HRMS ( $m/z$ ):**  $[M+Na^+]$  calcd for C<sub>29</sub>H<sub>30</sub>NO: 408.2327; found, 408.2322

**TLC:**  $R_f = 0.1$  (80:20 petroleum ether:EtOAc).

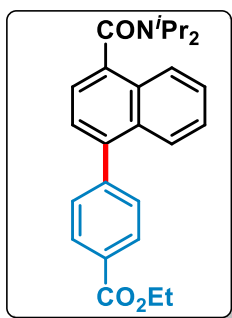

**Ethyl 4-(4-(diisopropylcarbamoyl)naphthalen-1-yl)benzoate:** Compound **3p** was prepared by general procedure B

**Eluent:** petroleum ether/ethyl acetate (80/20, v/v).

**Physical State:** White solid.

**Yield:** 82%

**<sup>1</sup>H NMR (400 MHz, CDCl<sub>3</sub>)** δ 8.16 (dd, *J* = 14.3, 6.7 Hz, 2H), 7.93 (t, *J* = 7.1 Hz, 1H), 7.84 (t, *J* = 7.2 Hz, 1H), 7.56 (t, *J* = 6.2 Hz, 2H), 7.55 – 7.50 (m, 1H), 7.48 – 7.43 (m, 1H), 7.39 (q, *J* = 7.2 Hz, 2H), 4.48 – 4.40 (m, 2H), 3.80 – 3.67 (m, 1H), 3.63 (dt, *J* = 13.6, 6.7 Hz, 1H), 1.74 (d, *J* = 6.8 Hz, 3H), 1.66 (t, *J* = 7.2 Hz, 4H), 1.43 (td, *J* = 7.1, 4.7 Hz, 3H), 1.13 (d, *J* = 6.7 Hz, 3H), 1.08 (t, *J* = 7.1 Hz, 3H).

**HRMS (*m/z*):** [M+H<sup>+</sup>] calcd for C<sub>26</sub>H<sub>30</sub>NO<sub>3</sub>: 404.22; found, 404.2218

**TLC:** R<sub>f</sub> = 0.3 (80:20 petroleum ether:EtOAc).

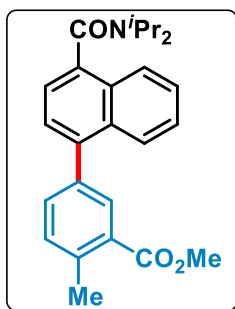

**Methyl 5-(4-(diisopropylcarbamoyl)naphthalen-1-yl)-2-methylbenzoate:** Compound **3q** was prepared by general procedure B

**Eluent:** petroleum ether/ethyl acetate (80/20, v/v).

**Physical State:** White solid.

**Yield:** 65%

**<sup>1</sup>H NMR (500 MHz, CDCl<sub>3</sub>)** δ 8.04 (s, 1H), 7.91 (d, *J* = 8.2 Hz, 1H), 7.85 (d, *J* = 8.4 Hz, 1H), 7.52 (t, *J* = 6.2 Hz, 2H), 7.45 (t, 1H), 7.37 (t, 3H), 3.89 (s, 3H), 2.70 (s, 3H), 1.74 (d, *J* = 6.6 Hz, 3H), 1.67 (d, *J* = 6.8 Hz, 3H), 1.12 (d, *J* = 6.5 Hz, 3H), 1.08 (d, *J* = 6.6 Hz, 3H).

**<sup>13</sup>C NMR (126 MHz, CDCl<sub>3</sub>)** δ 170.15 (s), 167.93 (s), 139.40 (s), 137.90 (s), 133.44 (s), 131.96 (s), 131.74 (d, *J* = 3.3 Hz), 129.87 (s), 129.59 (s), 126.61 (d, *J* = 3.7 Hz), 126.39 (s), 126.16 (s), 125.26 (s), 121.65 (s), 114.05 (s), 51.91 (s), 51.19 (s), 46.11 (s), 29.64 (s), 22.67 (s), 21.47 (s), 20.88 (s), 20.75 (s), 20.67 (s).

**HRMS (*m/z*):** [M+H<sup>+</sup>] calcd for C<sub>26</sub>H<sub>30</sub>NO<sub>3</sub>: 404.2216; found, 404.2220

**TLC:** R<sub>f</sub> = 0.25 (80:20 petroleum ether:EtOAc).

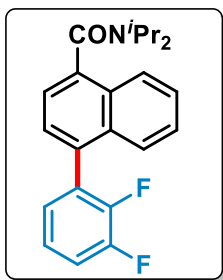

**4-(2,3-difluorophenyl)-N,N-diisopropyl-1-naphthamide:** Compound **3r** was prepared by general procedure B

**Eluent:** petroleum ether/ethyl acetate (80/20, v/v).

**Physical State:** White solid.

**Yield:** 69%

**<sup>1</sup>H NMR (400 MHz, CDCl<sub>3</sub>)**  $\delta$  7.90 – 7.77 (m, 3H), 7.54 – 7.40 (m, 3H), 7.32 (d,  $J$  = 6.9 Hz, 1H), 7.26 (m, 2H), 3.66 – 3.55 (m,  $J$  = 19.0, 6.4 Hz, 2H), 1.73 (d,  $J$  = 6.7 Hz, 3H), 1.65 (d,  $J$  = 6.0 Hz, 3H), 1.08 (d,  $J$  = 6.6 Hz, 3H), 1.04 (d,  $J$  = 6.6 Hz, 3H).

**<sup>13</sup>C NMR (126 MHz, CDCl<sub>3</sub>)**  $\delta$  170.12 (s), 136.68 (s), 133.52 (s), 129.57 (s), 129.38 (s), 128.22 (d,  $J$  = 10.0 Hz), 127.54 (s), 126.66 (s), 126.31 (s), 125.33 (d,  $J$  = 15.7 Hz), 124.90 (s), 122.10 (s), 51.07 (s), 46.01 (s), 20.73 (dd,  $J$  = 19.0, 10.4 Hz).

**<sup>19</sup>F NMR (471 MHz, CDCl<sub>3</sub>)**  $\delta$  -109.97 (s).

**HRMS ( $m/z$ ):** [M+H<sup>+</sup>] calcd for C<sub>23</sub>H<sub>24</sub>F<sub>2</sub>NO: 368.1781; found, 368.1783

**TLC:**  $R_f$  = 0.05 (80:20 petroleum ether:EtOAc).

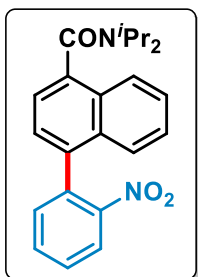

**N,N-diisopropyl-4-(2-nitrophenyl)-1-naphthamide:** Compound **3s** was prepared by general procedure B

**Eluent:** petroleum ether/ethyl acetate (80/20, v/v).

**Physical State:** yellowish liquid.

**Yield:** 72%

**<sup>1</sup>H NMR (500 MHz, CDCl<sub>3</sub>)**  $\delta$  8.10 (d,  $J$  = 8.3 Hz, 1H), 7.91 (d,  $J$  = 8.3 Hz, 1H), 7.71 (q,  $J$  = 7.3 Hz, 1H), 7.62 (t,  $J$  = 7.6 Hz, 1H), 7.51 (dd,  $J$  = 5.6, 3.4 Hz, 1H), 7.47 – 7.39 (m, 3H), 7.37 – 7.30 (m, 2H), 3.76 (dq,  $J$  = 13.2, 6.7 Hz, 1H), 3.65 (dt,  $J$  = 21.5, 7.4 Hz, 1H), 1.74 (d,  $J$  = 6.8 Hz, 3H), 1.67 (d,  $J$  = 6.8 Hz, 3H), 1.12 (dd,  $J$  = 15.6, 6.8 Hz, 5H).

**<sup>13</sup>C NMR (126 MHz, CDCl<sub>3</sub>)**  $\delta$  169.84 (s), 149.48 (s), 137.09 (s), 135.89 (s), 135.06 (s), 133.24 (s), 132.82 (s), 131.72 (s), 129.61 (s), 128.83 (s), 126.98 (s), 126.81 (s), 125.86 – 125.23 (m), 124.28 (s), 121.40 (s), 51.24 (s), 46.05 (s), 20.97 (s), 20.83 – 20.55 (m).

**HRMS ( $m/z$ ):** [M+Na<sup>+</sup>] calcd for C<sub>23</sub>H<sub>24</sub>N<sub>2</sub>NaO<sub>3</sub>: 399.1679; found, 399.1679

**TLC:**  $R_f$  = 0.4 (80:20 petroleum ether:EtOAc).

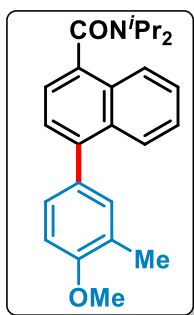

***N,N*-diisopropyl-4-(4-methoxy-3-methylphenyl)-1-naphthamide:** Compound **3t** was prepared by general procedure B

**Eluent:** petroleum ether/ethyl acetate (80/20, v/v).

**Physical State:** White solid.

**Yield:** 79%

**<sup>1</sup>H NMR (500 MHz, CDCl<sub>3</sub>)** δ 7.95 (t, *J* = 9.3 Hz, 1H), 7.89 (d, *J* = 8.3 Hz, 1H), 7.53 – 7.47 (m, 1H), 7.43 (dd, *J* = 16.0, 8.6 Hz, 1H), 7.35 (dd, *J* = 18.5, 7.1 Hz, 2H), 7.28 (t, *J* = 8.2 Hz, 2H), 6.95 (d, *J* = 8.0 Hz, 1H), 3.92 (s, 3H), 3.74 (dt, *J* = 13.3, 6.7 Hz, 1H), 3.66 – 3.57 (m, 1H), 2.30 (s, 3H), 1.74 (d, *J* = 6.8 Hz, 3H), 1.67 (d, *J* = 6.8 Hz, 3H), 1.12 (d, *J* = 6.6 Hz, 3H), 1.08 (d, *J* = 6.7 Hz, 3H).

**<sup>13</sup>C NMR (126 MHz, CDCl<sub>3</sub>)** δ 170.31 (s), 157.23 (s), 140.43 (s), 135.78 (s), 132.32 (s), 132.04 (s), 129.94 (s), 128.35 (s), 126.68 – 126.09 (m), 125.17 (s), 121.64 (s), 109.66 (s), 77.25 (s), 77.14 – 76.90 (m), 76.75 (s), 55.42 (s), 51.11 (s), 46.01 (s), 20.76 (dd, *J* = 19.2, 11.4 Hz), 16.31 (s).

**HRMS (*m/z*):** [M+H<sup>+</sup>] calcd for C<sub>27</sub>H<sub>27</sub>NO<sub>3</sub>: xxxxx; found, xxxxxxxx

**TLC:** R<sub>f</sub> = 0.25 (80:20 petroleum ether:EtOAc).

**HRMS (*m/z*):** [M+Na<sup>+</sup>] calcd for C<sub>25</sub>H<sub>29</sub>NNaO<sub>2</sub>: 398.2087; found, 398.2087

**TLC:** R<sub>f</sub> = 0.25 (80:20 petroleum ether:EtOAc).

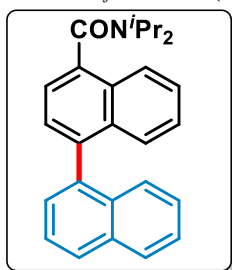

***N,N*-diisopropyl-[1,1'-binaphthalene]-4-carboxamide:** Compound **3u** was prepared by general procedure B

**Eluent:** petroleum ether/ethyl acetate (80/20, v/v).

**Physical State:** White solid.

**Yield:** 69% (*p*:others 4:1)

**<sup>1</sup>H NMR (500 MHz, CDCl<sub>3</sub>)** δ 7.95 (t, *J* = 10.2 Hz, 2H), 7.59 (t, *J* = 7.6 Hz, 1H), 7.54 – 7.41 (m, 5H), 7.37 (dd, *J* = 16.4, 7.9 Hz, 1H), 7.32 – 7.28 (m, 1H), 3.94 – 3.78 (m, 1H), 3.73 – 3.57 (m, 1H), 1.78 (d, *J* = 6.8 Hz, 2H), 1.71 (d, *J* = 6.8 Hz, 2H), 1.22 – 1.11 (m, 4H).

**<sup>13</sup>C NMR (126 MHz, CDCl<sub>3</sub>)** δ 170.20 (s), 138.76 (s), 138.05 (s), 136.50 (s), 133.48 (d, *J* = 4.6 Hz), 129.68 (s), 128.03 (d, *J* = 3.8 Hz), 127.57 (s), 127.19 (s), 126.91 (d, *J* = 5.0 Hz), 126.60 (d, *J* = 11.3 Hz), 126.43 – 126.22 (m), 126.13 (s), 125.92 (s), 125.78 (s), 125.47 (s), 125.16 (d, *J* = 4.8 Hz), 121.61 (d, *J* = 5.0 Hz), 51.18 (d, *J* = 7.4 Hz), 46.07 (s), 21.08 (s), 20.96 (s), 20.81 (s), 20.72 (d, *J* = 3.1 Hz).

**HRMS (*m/z*):** [M+H<sup>+</sup>] calcd for C<sub>27</sub>H<sub>28</sub>NO: 382.21; found, 382.2176

**TLC:** R<sub>f</sub> = 0.1 (80:20 petroleum ether:EtOAc).

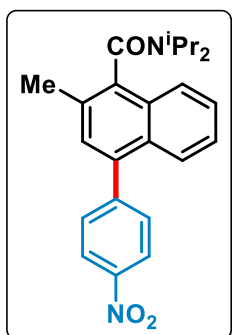

*N,N-diisopropyl-2-methyl-4-(4-nitrophenyl)-1-naphthamide*: Compound **3v** was prepared by general procedure B

**Eluent**: petroleum ether/ethyl acetate (80/20, v/v).

**Physical State**: Pale yellowish liquid.

**Yield**: 67% (*p*:others 4:1)

**<sup>1</sup>H NMR (400 MHz, CDCl<sub>3</sub>)** δ 8.35 (d, *J* = 6.2 Hz, 2H), 7.83 (d, *J* = 8.3 Hz, 1H), 7.73 (d, *J* = 8.2 Hz, 1H), 7.66 (d, 2H), 7.52 (t, 1H), 7.41 (t, 1H), 7.26 (s, 1H), 3.69 – 3.55 (m, 2H), 2.50 (s, 2H), 1.79 (d, *J* = 6.8 Hz, 4H), 1.71 (d, *J* = 6.8 Hz, 3H), 1.15 (d, *J* = 5.9 Hz, 3H), 1.05 (d, *J* = 6.6, 2.4 Hz, 3H).

**<sup>13</sup>C NMR (126 MHz, CDCl<sub>3</sub>)** δ 169.34 (s), 147.28 (d, *J* = 11.2 Hz), 137.50 (s), 135.39 (s), 130.91 (s), 130.20 (d, *J* = 6.7 Hz), 129.75 (s), 129.48 (s), 126.88 (s), 126.16 (s), 125.25 (d, *J* = 19.4 Hz), 123.58 (s), 51.25 (s), 46.26 (s), 21.14 (d, *J* = 17.4 Hz), 20.65 (d, *J* = 16.3 Hz).

**HRMS (*m/z*)**: [M+H<sup>+</sup>] calcd for C<sub>24</sub>H<sub>27</sub>N<sub>2</sub>O<sub>3</sub>: 391.1977; found, 391.1977

**TLC**: R<sub>f</sub> = 0.01 (80:20 petroleum ether:EtOAc).

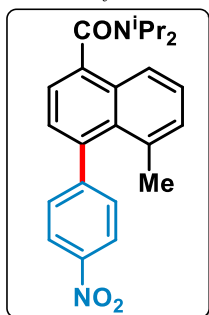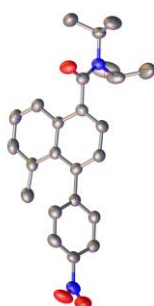

*N,N-diisopropyl-5-methyl-4-(4-nitrophenyl)-1-naphthamide*: Compound **3w** was prepared by general procedure B

**Eluent**: petroleum ether/ethyl acetate (80/20, v/v).

**Physical State**: White solid.

**Yield**: 71%

**<sup>1</sup>H NMR (400 MHz, CDCl<sub>3</sub>)** δ 8.40 – 8.24 (m, 3H), 7.82 (t, *J* = 8.0 Hz, 1H), 7.61 – 7.56 (m, 1H), 7.51 – 7.39 (m, 2H), 7.33 – 7.22 (m, 3H), 3.70 – 3.60 (m, 2H), 2.01 (s, 3H), 1.74 (d, 3H), 1.67 (d, 3H), 1.11 (dd, *J* = 11.3, 6.7 Hz, 6H).

**HRMS (*m/z*)**: [M+H<sup>+</sup>] calcd for C<sub>24</sub>H<sub>27</sub>N<sub>2</sub>O<sub>3</sub>: 391.1977; found, 391.1977

**TLC**: R<sub>f</sub> = 0.01 (80:20 petroleum ether:EtOAc).

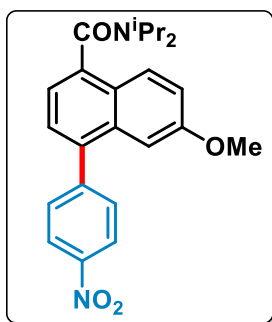

***N,N*-diisopropyl-6-methoxy-4-(4-nitrophenyl)-1-naphthamide:** Compound **3x** was prepared by general procedure B

**Eluent:** petroleum ether/ethyl acetate (80/20, v/v).

**Physical State:** White solid.

**Yield:** 65%

**<sup>1</sup>H NMR (400 MHz, CDCl<sub>3</sub>)** δ 8.37 (d, *J* = 8.4 Hz, 1H), 7.84 (d, *J* = 9.1 Hz, 1H), 7.69 (d, *J* = 8.4 Hz, 1H), 7.36 (d, *J* = 7.1 Hz, 1H), 7.23 (dd, *J* = 14.3, 4.8 Hz, 1H), 7.08 (d, *J* = 1.9 Hz, 1H), 3.76 (s, 1H), 3.69 (dd, *J* = 13.3, 6.6 Hz, 1H), 3.62 (dt, *J* = 13.5, 6.7 Hz, 1H), 1.73 (d, *J* = 6.7 Hz, 2H), 1.66 (d, *J* = 6.7 Hz, 2H), 1.13 (d, *J* = 6.6 Hz, 1H), 1.08 (d, *J* = 6.6 Hz, 2H).

**<sup>13</sup>C NMR (126 MHz, CDCl<sub>3</sub>)** δ 169.75 (s), 158.41 (s), 147.63 (s), 147.20 (s), 137.37 (s), 136.66 (s), 132.52 (s), 130.73 (s), 127.17 (d, *J* = 12.9 Hz), 125.30 (s), 123.73 (s), 119.29 (s), 104.16 (s), 77.25 (s), 77.11 – 76.88 (m), 76.75 (s), 55.23 (s), 51.16 (s), 46.08 (s), 20.88 (s), 20.67 (d, *J* = 4.6 Hz).

**HRMS (*m/z*):** [M+H<sup>+</sup>] calcd for C<sub>24</sub>H<sub>27</sub>N<sub>2</sub>O<sub>4</sub>: 407.1926; found, 407.1927

**TLC:** R<sub>f</sub> = 0.4 (80:20 petroleum ether:EtOAc).

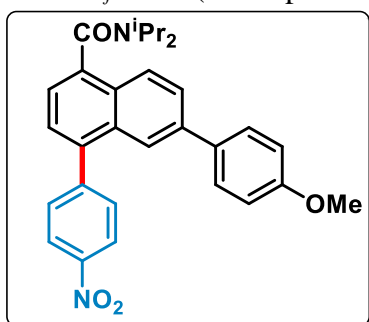

***N,N*-diisopropyl-6-methoxy-4-(4-nitrophenyl)-1-naphthamide:** Compound **3y** was prepared by general procedure B

**Eluent:** petroleum ether/ethyl acetate (80/20, v/v).

**Physical State:** yellowish solid.

**Yield:** 75%

**<sup>1</sup>H NMR (400 MHz, CDCl<sub>3</sub>)** δ 8.37 (d, *J* = 8.4 Hz, 1H), 7.84 (d, *J* = 9.1 Hz, 1H), 7.69 (d, *J* = 8.4 Hz, 1H), 7.36 (d, *J* = 7.1 Hz, 1H), 7.23 (dd, *J* = 14.3, 4.8 Hz, 1H), 7.08 (d, *J* = 1.9 Hz, 1H), 3.76 (s, 1H), 3.69 (dd, *J* = 13.3, 6.6 Hz, 1H), 3.62 (dt, *J* = 13.5, 6.7 Hz, 1H), 1.73 (d, *J* = 6.7 Hz, 2H), 1.66 (d, *J* = 6.7 Hz, 2H), 1.13 (d, *J* = 6.6 Hz, 1H), 1.08 (d, *J* = 6.6 Hz, 2H).

**<sup>13</sup>C NMR (126 MHz, CDCl<sub>3</sub>)** δ 169.75 (s), 158.41 (s), 147.63 (s), 147.20 (s), 137.37 (s), 136.66 (s), 132.52 (s), 130.73 (s), 127.17 (d, *J* = 12.9 Hz), 125.30 (s), 123.73 (s), 119.29 (s), 104.16 (s), 77.25 (s), 77.11 – 76.88 (m), 76.75 (s), 55.23 (s), 51.16 (s), 46.08 (s), 20.88 (s), 20.67 (d, *J* = 4.6 Hz).

**HRMS (*m/z*):** [M+H<sup>+</sup>] calcd for C<sub>30</sub>H<sub>31</sub>N<sub>2</sub>O<sub>4</sub>: 482.2239; found, 482.2239

**TLC:** R<sub>f</sub> = 0.4 (80:20 petroleum ether:EtOAc).

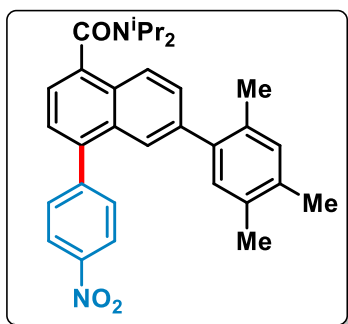

***N,N*-diisopropyl-4-(4-nitrophenyl)-6-(2,4,5-trimethylphenyl)-1-naphthamide:** Compound **3z** was prepared by general procedure B

**Eluent:** petroleum ether/ethyl acetate (80/20, v/v).

**Physical State:** yellowish solid.

**Yield:** 79%

**<sup>1</sup>H NMR (500 MHz, CDCl<sub>3</sub>)** δ 8.33 (d, *J* = 8.6 Hz, 2H), 7.96 (d, *J* = 8.6 Hz, 1H), 7.71 – 7.65 (m, 3H), 7.55 (dt, *J* = 11.3, 5.6 Hz, 1H), 7.41 (dd, *J* = 16.9, 7.2 Hz, 2H), 7.05 (s, 1H), 6.99 (s, 1H), 3.79 (tt, *J* = 14.9, 7.5 Hz, 1H), 3.71 – 3.60 (m, 1H), 2.26 (s, 3H), 2.24 (s, 3H), 2.19 (s, 3H), 1.77 (d, *J* = 6.8 Hz, 3H), 1.69 (d, *J* = 6.8 Hz, 3H), 1.16 (dd, *J* = 13.0, 6.7 Hz, 6H).

**<sup>13</sup>C NMR (126 MHz, CDCl<sub>3</sub>)** δ 169.77 (s), 147.22 (d, *J* = 5.0 Hz), 140.81 (s), 138.64 (s), 138.03 (s), 137.28 (s), 136.08 (s), 134.03 (s), 132.48 (s), 131.86 (s), 131.20 – 130.74 (m), 129.00 (s), 128.60 (s), 126.75 (s), 125.47 (s), 125.11 (s), 123.62 (s), 121.24 (s), 51.27 (s), 46.18 (s), 20.98 (s), 20.70 (d, *J* = 3.2 Hz), 19.83 (s), 19.23 (d, *J* = 12.7 Hz).

**HRMS (*m/z*):** [M+H<sup>+</sup>] calcd for C<sub>32</sub>H<sub>35</sub>N<sub>2</sub>O<sub>3</sub>: 495.2603; found, 495.2606

**TLC:** R<sub>f</sub> = 0.2 (80:20 petroleum ether:EtOAc).

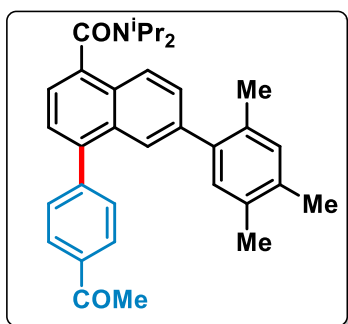

**4-(4-acetylphenyl)-*N,N*-diisopropyl-6-(2,4,5-trimethylphenyl)-1-naphthamide:** Compound **3aa** was prepared by general procedure B

**Eluent:** petroleum ether/ethyl acetate (80/20, v/v).

**Physical State:** White solid.

**Yield:** 81%

**<sup>1</sup>H NMR (500 MHz, CDCl<sub>3</sub>)** δ 8.07 (t, *J* = 11.8 Hz, 2H), 7.94 (t, *J* = 11.2 Hz, 1H), 7.75 (d, *J* = 1.3 Hz, 1H), 7.60 (d, *J* = 8.2 Hz, 2H), 7.53 (dd, *J* = 8.6, 1.6 Hz, 1H), 7.40 (dd, *J* = 22.3, 7.2 Hz, 2H), 7.04 (d, *J* = 10.1 Hz, 1H), 7.01 (d, *J* = 11.5 Hz, 1H), 3.88 – 3.78 (m, 1H), 3.65 (dq, *J* = 13.5, 6.7 Hz, 1H), 2.66 (s, 3H), 2.26 (s, 3H), 2.24 (s, 3H), 2.19 (s, 3H), 1.77 (d, *J* = 6.8 Hz, 3H), 1.69 (t, *J* = 6.5 Hz, 3H), 1.16 (dd, *J* = 12.5, 6.7 Hz, 6H).

**<sup>13</sup>C NMR (126 MHz, CDCl<sub>3</sub>)** δ 197.82 (s), 169.97 (s), 145.35 (s), 140.34 (s), 139.28 (s), 138.87 (s), 136.70 (s), 135.94 (d, *J* = 16.3 Hz), 133.93 (s), 132.55 (s), 131.78 (s), 131.33 (s), 131.07 (s), 130.25 (s), 128.66 (d, *J* = 15.4 Hz), 128.37 (s), 126.55 (s), 125.90 (s), 124.99 (s), 121.28 (s), 51.21 (s), 46.10 (s), 26.67 (s), 20.98 (s), 20.71 (d, *J* = 3.2 Hz), 19.84 (s), 19.21 (d, *J* = 12.8 Hz).

**HRMS (*m/z*):** [M+H<sup>+</sup>] calcd for C<sub>34</sub>H<sub>38</sub>NO<sub>2</sub>: 492.2858; found, 492.2858

**TLC:** R<sub>f</sub> = 0.4 (80:20 petroleum ether:EtOAc).

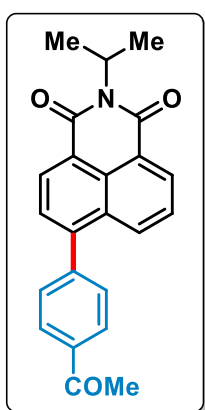

**6-(4-acetylphenyl)-2-isopropyl-1H-benzo[de]isoquinoline-1,3(2H)-dione:** Compound **3ab** was prepared by general procedure B

**Eluent:** petroleum ether/ethyl acetate (80/20, v/v).

**Physical State:** yellowish solid.

**Yield:** 69%

**<sup>1</sup>H NMR (400 MHz, CDCl<sub>3</sub>)** δ 8.62 (dd, *J* = 9.6, 4.1 Hz, 2H), 8.15 (dd, *J* = 13.6, 4.7 Hz, 3H), 7.70 (t, *J* = 7.7 Hz, 2H), 7.61 (d, *J* = 8.3 Hz, 2H), 5.46 (hept, *J* = 7.0 Hz, 1H), 2.70 (s, 3H), 1.64 – 1.61 (m, 6H).

**<sup>13</sup>C NMR (101 MHz, CDCl<sub>3</sub>)** δ 197.49 (s), 164.44 (s), 164.24 (s), 145.05 (s), 143.61 (s), 136.92 (s), 131.68 (s), 131.14 (s), 130.50 (s), 130.16 (s), 129.65 (s), 128.64 (d, *J* = 5.9 Hz), 127.75 (s), 127.16 (s), 123.61 (s), 123.00 (s), 45.36 (s), 26.72 (s), 19.77 (s).

**HRMS (*m/z*):** [M+H<sup>+</sup>] calcd for C<sub>23</sub>H<sub>20</sub>NO<sub>3</sub>: 358.1958; found, 358.1958

**TLC:** R<sub>f</sub> = 0.2 (80:20 petroleum ether:EtOAc).

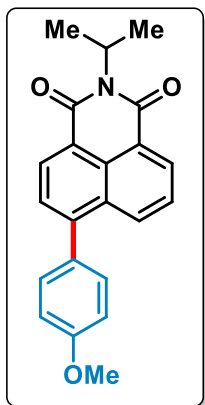

**2-isopropyl-6-(4-methoxyphenyl)-1H-benzo[de]isoquinoline-1,3(2H)-dione:** Compound **3ac** was prepared by general procedure B

**Eluent:** petroleum ether/ethyl acetate (80/20, v/v).

**Physical State:** Pale green solid.

**Yield:** 65%

**<sup>1</sup>H NMR (400 MHz, CDCl<sub>3</sub>)** δ 8.60 (d, *J* = 7.5 Hz, 2H), 8.27 (dd, *J* = 8.5, 0.9 Hz, 1H), 7.71 – 7.64 (m, 2H), 7.47 – 7.41 (m, 2H), 7.11 – 7.05 (m, 2H), 5.46 (hept, *J* = 6.9 Hz, 1H), 3.91 (s, 3H), 1.62 (d, *J* = 6.9 Hz, 6H).

**<sup>13</sup>C NMR (101 MHz, CDCl<sub>3</sub>)** δ 164.58 (d, *J* = 19.3 Hz), 159.90 (s), 146.33 (s), 132.36 (s), 131.07 (t, *J* = 13.1 Hz), 130.69 (s), 130.05 (s), 128.79 (s), 127.72 (s), 126.66 (s), 123.46 (s), 121.94 (s), 114.15 (s), 55.43 (s), 45.22 (s), 19.78 (s).

**HRMS (*m/z*):** [M+H<sup>+</sup>] calcd for C<sub>22</sub>H<sub>20</sub>NO<sub>3</sub>: 346.1398; found, 346.1399

**TLC:** R<sub>f</sub> = 0.2 (80:20 petroleum ether:EtOAc).

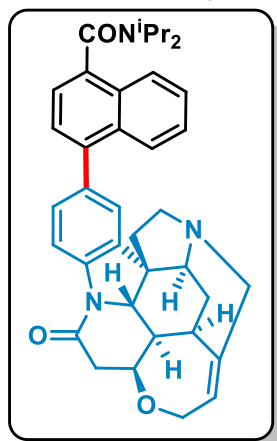

*N,N*-diisopropyl-4-((4*aR*,4*a1R*,5*aS*,8*aR*,8*a1S*,15*aS*)-14-oxo-2,4*a*,4*a1*,5,5*a*,7,8,8*a1*,15,15*a*-decahydro-14*H*-4,6-methanoindolo[3,2,1-*ij*]oxepino[2,3,4-*de*]pyrrolo[2,3-*h*]quinolin-10-yl)-1-naphthamide: Compound **3ad** was prepared by general procedure B

**Eluent:** Dichloromethane/Methanol (90:10, v/v).

**Physical State:** pale yellowish liquid.

**Yield:** 58%

**<sup>1</sup>H NMR (500 MHz, DMSO)** δ 8.37 (s, 5H), 8.16 (s, 16H), 7.73 (d, J = 8.5 Hz, 17H), 7.69 – 7.61 (m, 24H), 6.45 (s, 21H), 5.91 – 5.82 (m, 36H), 4.62 (s, 17H), 4.44 – 4.34 (m, 44H), 4.18 (ddd, J = 24.2, 14.7, 5.7 Hz, 72H), 4.07 – 3.94 (m, 49H), 3.00 – 2.88 (m, 27H), 2.68 (dd, J = 30.5, 15.8 Hz, 52H), 2.40 – 2.28 (m, 32H), 2.23 (dd, J = 13.4, 5.6 Hz, 23H), 1.73 (d, J = 15.6 Hz, 20H), 1.62 (d, J = 6.6 Hz, 15H), 1.57 – 1.47 (m, 37H), 1.30 – 1.17 (m, 42H), 1.06 (dd, J = 15.7, 5.1 Hz, 14H), 0.89 – 0.82 (m, 18H).

**<sup>13</sup>C NMR (126 MHz, DMSO)** δ 169.07 (s), 158.90 – 158.51 (m), 158.45 (s), 158.08 (d, J = 31.0 Hz), 141.49 (s), 138.17 (s), 136.59 (s), 132.20 (s), 131.84 (s), 120.85 (s), 118.47 (s), 117.38 (s), 116.08 (s), 113.70 (s), 87.35 (s), 79.34 (d, J = 6.4 Hz), 79.10 (s), 78.84 (s), 75.49 (s), 72.90 (s), 69.37 (s), 63.26 (s), 60.37 (s), 58.45 (s), 58.19 (s), 52.16 (s), 45.83 (s), 38.43 (s), 28.88 (s), 24.90 (s).

**HRMS (m/z):** [M+H<sup>+</sup>] calcd for C<sub>38</sub>H<sub>42</sub>N<sub>3</sub>O<sub>3</sub>: 588.3222; found, 588.3221

**TLC:** R<sub>f</sub> = 0.1 (90:10 Dichloromethane/Methanol).

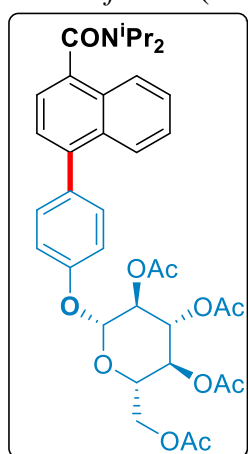

(2*S*,3*S*,4*R*,5*S*,6*R*)-2-(acetoxymethyl)-6-(4-(4-(diisopropylcarbamoyl)naphthalen-1-yl)phenoxy)tetrahydro-2*H*-pyran-3,4,5-triyl triacetate: Compound **3ae** was prepared by general procedure B

**Eluent:** petroleum ether/ethyl acetate (80/20, v/v).

**Physical State:** White solid.

**Yield:** 63%

**<sup>1</sup>H NMR (500 MHz, CDCl<sub>3</sub>)** δ 7.88 (t, *J* = 7.5 Hz, 2H), 7.50 (t, *J* = 7.6 Hz, 1H), 7.44 (d, *J* = 7.7 Hz, 1H), 7.41 (d, *J* = 8.4 Hz, 1H), 7.37 – 7.31 (m, 2H), 7.11 (d, *J* = 8.5 Hz, 2H), 5.37 – 5.27 (m, 3H), 5.24 – 5.16 (m, 2H), 4.36 – 4.28 (m, *J* = 12.1, 5.0 Hz, 1H), 4.23 – 4.17 (m, 1H), 3.96 – 3.89 (m, *J* = 9.7, 5.3, 2.3 Hz, 1H), 3.76 – 3.68 (m, 1H), 3.64 – 3.57 (m, *J* = 13.5, 6.7 Hz, 1H), 2.10 (s, 3H), 2.08 (s, 3H), 2.05 (d, *J* = 3.4 Hz, 6H), 1.73 (d, *J* = 6.8 Hz, 3H), 1.65 (d, *J* = 6.8 Hz, 3H), 1.11 (d, *J* = 6.6 Hz, 3H), 1.07 (d, *J* = 6.7 Hz, 3H).

**<sup>13</sup>C NMR (126 MHz, CDCl<sub>3</sub>)** δ 170.56 (s), 170.23 (s), 170.17 (s), 169.40 (s), 169.32 (s), 156.19 (s), 139.67 (s), 136.08 (s), 135.39 (s), 131.80 (s), 131.17 (s), 129.85 (s), 126.53 (s), 126.32 (d, *J* = 23.5 Hz), 125.17 (s), 121.56 (s), 116.64 (s), 98.94 (s), 89.95 (s), 72.70 (s), 72.03 (s), 71.15 (s), 68.27 (s), 61.95 (s), 51.15 (s), 46.04 (s), 21.03 – 20.89 (m), 20.89 – 20.41 (m).

**HRMS (*m/z*):** [M+K<sup>+</sup>] calcd for C<sub>37</sub>H<sub>43</sub>KNO<sub>10</sub>: 700.2512; found, 700.2519

**TLC:** R<sub>f</sub> = 0.2 (60:40 petroleum ether:EtOAc).

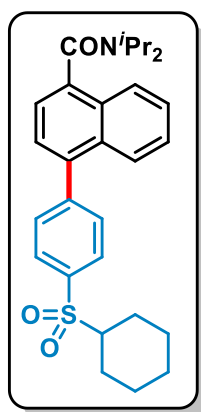

**4-(4-(cyclohexylsulfonyl)phenyl)-N,N-diisopropyl-1-naphthamide:** Compound **3af** was prepared by general procedure B

**Eluent:** petroleum ether/ethyl acetate (80/20, v/v).

**Physical State:** pale yellowish liquid.

**Yield:** 59%

**<sup>1</sup>H NMR (500 MHz, CDCl<sub>3</sub>)** δ 8.00 (d, *J* = 8.3 Hz, 2H), 7.92 (d, *J* = 7.2 Hz, 1H), 7.80 (d, *J* = 6.7 Hz, 1H), 7.62 (d, *J* = 6.5 Hz, 2H), 7.55 (t, *J* = 7.6 Hz, 1H), 7.47 (t, 1H), 7.43 – 7.35 (m, 2H), 3.76 – 3.67 (m, *J* = 13.1, 6.4 Hz, 1H), 3.67 – 3.59 (m, *J* = 13.7, 6.7 Hz, 1H), 3.32 – 3.22 (m, 1H), 1.90 – 1.82 (m, *J* = 12.3 Hz, 2H), 1.75 (d, *J* = 6.8 Hz, 3H), 1.69 (d, *J* = 6.2 Hz, 1H), 1.67 (d, *J* = 6.8 Hz, 3H), 1.55 (d, *J* = 4.0 Hz, 1H), 1.29 – 1.22 (m, *J* = 13.7 Hz, 5H), 1.12 (d, *J* = 7.2 Hz, 3H), 1.09 (d, *J* = 6.7 Hz, 3H).

**<sup>13</sup>C NMR (126 MHz, CDCl<sub>3</sub>)** δ 169.82 (s), 144.75 (s), 140.52 (s), 138.61 (s), 137.14 (s), 131.36 (s), 130.67 (s), 129.92 (s), 126.91 (t, *J* = 4.6 Hz), 126.50 (s), 125.77 (s), 125.44 (s), 121.53 (s), 52.78 (s), 51.19 (s), 46.12 (s), 34.09 (s), 25.15 (s), 24.66 (s), 21.25 – 20.57 (m).

**HRMS (*m/z*):** [M+H<sup>+</sup>] calcd for C<sub>29</sub>H<sub>36</sub>NO<sub>3</sub>S: 478.2371; found, 478.2374

**TLC:** R<sub>f</sub> = 0.2 (60:40 petroleum ether:EtOAc).

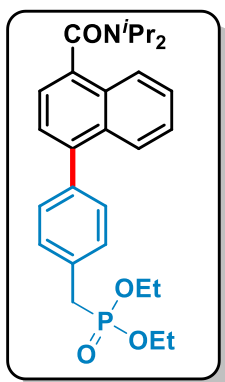

**diethyl (4-(4-(diisopropylcarbamoyl)naphthalen-1-yl)benzyl)phosphonate:** Compound **3ag** was prepared by general procedure B

**Eluent:** petroleum ether/ethyl acetate (80/20, v/v).

**Physical State:** pale yellowish liquid.

**Yield:** 65%

**<sup>1</sup>H NMR (500 MHz, CDCl<sub>3</sub>)** δ 8.00 – 7.82 (m, 2H), 7.67 (dd, *J* = 22.0, 7.8 Hz, 1H), 7.59 – 7.51 (m, 1H), 7.51 – 7.43 (m, 4H), 7.36 (ddd, *J* = 24.6, 18.0, 7.4 Hz, 2H), 4.18 – 4.04 (m, 4H), 3.76 (ddd, *J* = 20.9, 10.7, 5.9 Hz, 1H), 3.68 – 3.61 (m, 1H), 3.25 (dd, *J* = 30.2, 12.8 Hz, 2H), 1.76 (t, *J* = 5.8 Hz, 3H), 1.69 (d, *J* = 6.8 Hz, 3H), 1.36 – 1.28 (m, 7H), 1.12 (dt, *J* = 21.7, 7.0 Hz, 5H).

**<sup>13</sup>C NMR (126 MHz, CDCl<sub>3</sub>)** δ 170.21 (s), 140.09 (s), 138.98 (d, *J* = 4.0 Hz), 136.23 (s), 130.29 (dd, *J* = 15.3, 4.8 Hz), 129.99 – 129.64 (m), 128.82 (s), 126.62 – 126.26 (m), 125.24 (s), 122.55 (d, *J* = 5.0 Hz), 121.62 (s), 62.28 (d, *J* = 6.8 Hz), 51.17 (s), 46.07 (s), 34.08 (s), 32.98 (s), 20.93 (s), 20.84 – 20.51 (m), 16.42 (d, *J* = 6.0 Hz).

**HRMS (*m/z*):** [M+H<sup>+</sup>] calcd for C<sub>28</sub>H<sub>37</sub>NO<sub>4</sub>P: 482.2415; found, 482.2417

**TLC:** R<sub>f</sub> = 0.5 (10:90 petroleum ether:EtOAc).

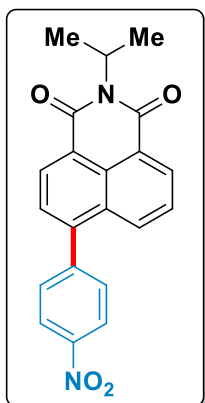

**2-isopropyl-6-(4-nitrophenyl)-1H-benzo[de]isoquinoline-1,3(2H)-dione:** Compound **3ah** was prepared by general procedure B

**Eluent:** petroleum ether/ethyl acetate (80/20, v/v).

**Physical State:** White solid.

**Yield:** 65%

**<sup>1</sup>H NMR (500 MHz, CDCl<sub>3</sub>)** δ 8.65 (dd, *J* = 7.2, 5.8 Hz, 2H), 8.42 (d, *J* = 8.7 Hz, 2H), 8.10 (d, *J* = 8.4, 0.7 Hz, 1H), 7.74 (t, *J* = 8.3, 7.4 Hz, 1H), 7.72 – 7.67 (m, 3H), 5.51 – 5.41 (m, 1H), 1.62 (d, *J* = 7.0 Hz, 6H).

**<sup>13</sup>C NMR (126 MHz, CDCl<sub>3</sub>)** δ 164.30 (s), 164.09 (s), 147.87 (s), 145.46 (s), 143.56 (s), 131.24 (d, *J* = 19.6 Hz), 130.83 (s), 130.42 (s), 129.41 (s), 128.63 (s), 127.88 (s), 127.53 (s), 123.91 (s), 123.71 (s), 123.52 (s), 45.44 (s), 19.76 (s).

**HRMS (*m/z*):** [M+H<sup>+</sup>] calcd for C<sub>21</sub>H<sub>17</sub>N<sub>2</sub>O<sub>3</sub>: 361.1143; found, 361.1146

**TLC:** Rf = 0.3 (80:20 petroleum ether:EtOAc).

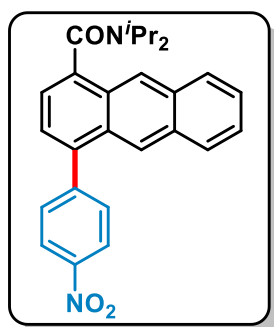

***N,N*-diisopropyl-4-(4-nitrophenyl)anthracene-1-carboxamide:** Compound **3ai** was prepared by general procedure B

**Eluent:** petroleum ether/ethyl acetate (80/20, v/v).

**Physical State:** White solid.

**Yield:** 81%

**<sup>1</sup>H NMR (400 MHz, CDCl<sub>3</sub>)** δ 8.51 (s, 1H), 8.42 (d, *J* = 8.8 Hz, 2H), 8.33 (s, 1H), 8.02 – 7.97 (m, *J* = 7.9 Hz, 1H), 7.87 (d, *J* = 7.8 Hz, 1H), 7.77 (d, *J* = 8.7 Hz, 2H), 7.54 – 7.45 (m, 2H), 7.39 (s, 2H), 3.83 – 3.74 (m, *J* = 13.3, 6.7 Hz, 1H), 3.68 (dq, *J* = 13.5, 6.7 Hz, 1H), 1.85 (d, *J* = 6.8 Hz, 3H), 1.72 (d, *J* = 6.8 Hz, 3H), 1.17 (d, *J* = 7.6 Hz, 3H), 1.09 (d, *J* = 6.7 Hz, 3H).

**<sup>13</sup>C NMR (101 MHz, CDCl<sub>3</sub>)** δ 169.74 (s), 147.40 (s), 138.10 (s), 137.61 (s), 132.03 (s), 131.79 (s), 130.98 (s), 129.43 (s), 128.25 (s), 128.05 (s), 126.33 (d, *J* = 3.6 Hz), 125.82 (s), 124.73 (s), 124.48 (s), 123.78 (s), 120.80 (s), 51.25 (s), 46.20 (s), 20.81 (t, *J* = 11.2 Hz).

**HRMS (*m/z*):** [M+H<sup>+</sup>] calcd for C<sub>27</sub>H<sub>27</sub>N<sub>2</sub>O<sub>3</sub>: 427.2027; found, 427.2016

**TLC:** Rf = 0.4 (80:20 petroleum ether:EtOAc).

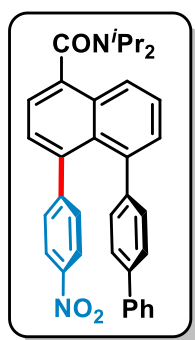

**5-([1,1'-biphenyl]-4-yl)-*N,N*-diisopropyl-4-(4-nitrophenyl)-1-naphthamide:** Compound **3aj** was prepared by

general procedure B

**Eluent:** petroleum ether/ethyl acetate (80/20, v/v).

**Physical State:** Yellowish solid.

**Yield:** 64%

**<sup>1</sup>H NMR (500 MHz, CDCl<sub>3</sub>)** δ 8.04 – 7.99 (m, *J* = 7.5 Hz, 1H), 7.80 (d, *J* = 8.9 Hz, 2H), 7.69 – 7.62 (m, 1H), 7.54 (d, *J* = 6.2 Hz, 1H), 7.46 – 7.36 (m, 4H), 7.36 – 7.29 (m, 3H), 7.14 (t, *J* = 9.6 Hz, 4H), 7.06 (d, *J* = 7.4 Hz, 1H), 7.00 (d, *J* = 7.2 Hz, 1H), 3.84 – 3.75 (m, *J* = 13.3, 6.6 Hz, 1H), 3.72 – 3.63 (m, *J* = 13.6, 6.8 Hz, 1H), 1.78 (d, *J* = 6.8 Hz, 3H), 1.70 (d, *J* = 6.8 Hz, 3H), 1.16 (dt, *J* = 20.5, 10.2 Hz, 6H).

**<sup>13</sup>C NMR (101 MHz, CDCl<sub>3</sub>)** δ 169.87 (s), 149.84 (s), 145.65 (s), 141.48 (s), 140.62 (s), 139.92 (d, *J* = 4.1 Hz), 138.19 (d, *J* = 8.0 Hz), 131.48 (d, *J* = 4.0 Hz), 130.48 (d, *J* = 22.2 Hz),

130.29 (s), 129.54 (s), 128.77 (s), 127.35 (s), 127.03 – 126.27 (m), 125.50 (s), 122.34 (d,  $J = 15.2$  Hz), 121.39 (s), 51.30 (s), 46.21 (s), 20.99 (s), 20.89 – 20.56 (m).

**HRMS ( $m/z$ ):**  $[M+H^+]$  calcd for  $C_{35}H_{33}N_2O_3$ : 529.2446 found, 529.2450

**TLC:**  $R_f = 0.2$  (80:20 petroleum ether:EtOAc).

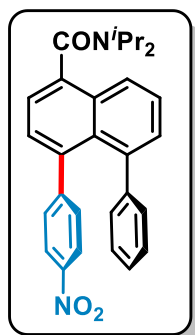

***N,N*-diisopropyl-4-(4-nitrophenyl)-5-phenyl-1-naphthamide:** Compound **3ak** was prepared by

general procedure B

**Eluent:** petroleum ether/ethyl acetate (80/20, v/v).

**Physical State:** White solid.

**Yield:** 71%

**$^1H$  NMR (500 MHz,  $CDCl_3$ )  $\delta$**  7.99 (d, 1H), 7.77 (d, 2H), 7.62 (t, 1H), 7.47 (d, 1H), 7.43 – 7.34 (m, 2H), 7.11 (dd,  $J = 12.7, 9.2$  Hz, 2H), 7.02 – 6.90 (m, 4H), 3.81 – 3.74 (m,  $J = 13.4, 6.7$  Hz, 1H), 3.70 – 3.62 (m,  $J = 13.6, 6.8$  Hz, 1H), 1.77 (d,  $J = 6.0$  Hz, 3H), 1.69 (d,  $J = 6.8$  Hz, 3H), 1.14 (t, 6H).

**HRMS ( $m/z$ ):**  $[M+H^+]$  calcd for  $C_{29}H_{29}N_2O_3$ : 453.2133; found, 453.2115

**TLC:**  $R_f = 0.01$  (80:20 petroleum ether:EtOAc).

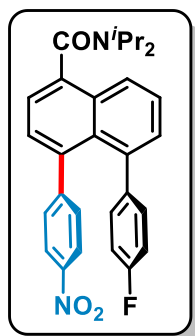

**5-(4-fluorophenyl)-*N,N*-diisopropyl-4-(4-nitrophenyl)-1-naphthamide:** Compound **3al** was prepared by

general procedure B

**Eluent:** petroleum ether/ethyl acetate (80/20, v/v).

**Physical State:** White solid.

**Yield:** 78%

**$^1H$  NMR (500 MHz,  $CDCl_3$ )  $\delta$**  7.99 (d,  $J = 8.9, 4.4$  Hz, 1H), 7.84 (d,  $J = 9.8$  Hz, 2H), 7.62 (t,  $J = 8.3, 7.2$  Hz, 1H), 7.44 (d,  $J = 7.1, 1.2$  Hz, 1H), 7.42 – 7.35 (m, 2H), 7.12 (dd,  $J = 11.6, 9.7$  Hz, 2H), 7.01 – 6.93 (m, 1H), 6.94 – 6.86 (m,  $J = 8.1, 5.0$  Hz, 1H), 6.71 – 6.62 (m,  $J = 11.8, 7.4, 4.8$  Hz, 2H), 3.81 – 3.72 (m, 1H), 3.70 – 3.61 (m,  $J = 13.5, 6.8$  Hz, 1H), 1.76 (d,  $J = 7.1$  Hz, 3H), 1.69 (d,  $J = 6.8$  Hz, 3H), 1.16 (t,  $J = 7.2$  Hz, 6H).

**$^{13}C$  NMR (126 MHz,  $CDCl_3$ )  $\delta$**  169.75 (s), 162.50 (s), 160.53 (s), 149.73 (s), 145.75 (s), 139.10 (s), 138.66 (d,  $J = 3.5$  Hz), 138.05 (d,  $J = 14.3$  Hz), 131.84 – 131.39 (m), 131.24 (d,  $J = 7.8$  Hz), 130.63 – 130.53 (m), 130.53 – 130.15 (m), 129.40 (s), 126.43 (s), 125.55 (s), 122.51

(s), 122.33 (s), 121.40 (s), 114.57 (d,  $J = 15.1$  Hz), 114.34 (s), 51.28 (s), 46.19 (s), 20.94 (s), 20.84 – 20.54 (m).

$^{19}\text{F}$  NMR (471 MHz,  $\text{CDCl}_3$ )  $\delta$  -115.33 (s).

HRMS ( $m/z$ ):  $[\text{M}+\text{H}^+]$  calcd for  $\text{C}_{29}\text{H}_{28}\text{FN}_2\text{O}_3$ : 471.2039; found, 471.2042

TLC:  $R_f = 0.4$  (80:20 petroleum ether:EtOAc).

### Boronic acid substrate scope

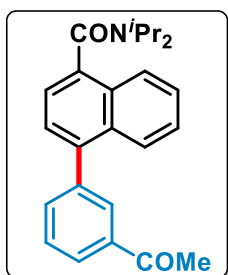

**4-(3-acetylphenyl)-*N,N*-diisopropyl-1-naphthamide:** Compound **6a** was prepared by general procedure B

**Eluent:** petroleum ether/ethyl acetate (80/20, v/v).

**Physical State:** White solid.

**Yield:** 60%

$^1\text{H}$  NMR (500 MHz,  $\text{CDCl}_3$ )  $\delta$  8.07 (s, 1H), 8.04 (d,  $J = 7.8$  Hz, 1H), 7.93 (d,  $J = 8.4$  Hz, 1H), 7.81 (d,  $J = 8.5$  Hz, 1H), 7.70 (d,  $J = 7.5$  Hz, 1H), 7.60 (t,  $J = 7.7$  Hz, 1H), 7.53 (t,  $J = 7.4$  Hz, 1H), 7.46 (t,  $J = 7.6$  Hz, 1H), 7.39 (dd,  $J = 15.6, 7.1$  Hz, 2H), 3.77 – 3.68 (m, 1H), 3.63 (dt,  $J = 13.6, 6.9$  Hz, 1H), 2.66 (s, 3H), 1.74 (t,  $J = 11.7$  Hz, 3H), 1.67 (t,  $J = 8.7$  Hz, 3H), 1.12 (dd,  $J = 9.8, 4.9$  Hz, 3H), 1.08 (t,  $J = 8.8$  Hz, 3H).

$^{13}\text{C}$  NMR (126 MHz,  $\text{CDCl}_3$ )  $\delta$  198.07 (s), 169.97 (s), 140.87 (s), 139.35 (s), 137.26 (s), 136.75 (s), 134.66 (s), 131.65 (s), 129.88 (d,  $J = 6.4$  Hz), 128.64 (s), 127.36 (s), 126.73 (d,  $J = 4.1$  Hz), 126.47 (s), 125.97 (s), 125.36 (s), 121.56 (s), 51.17 (s), 46.08 (s), 26.78 (s), 21.00 – 20.53 (m).

HRMS ( $m/z$ ):  $[\text{M}+\text{Na}^+]$  calcd for  $\text{C}_{23}\text{H}_{24}\text{N}_2\text{NaO}_3$ : 399.1679; found, 399.1679

TLC:  $R_f = 0.2$  (80:20 petroleum ether:EtOAc).

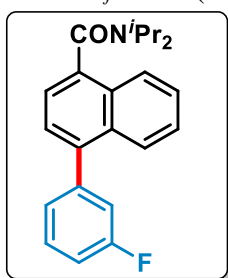

**4-(3-fluorophenyl)-*N,N*-diisopropyl-1-naphthamide:** Compound **6b** was prepared by general procedure B

**Eluent:** petroleum ether/ethyl acetate (80/20, v/v).

**Physical State:** White solid.

**Yield:** 73%

$^1\text{H}$  NMR (500 MHz,  $\text{CDCl}_3$ )  $\delta$  7.92 (t,  $J = 7.7$  Hz, 1H), 7.88 (d,  $J = 8.5$  Hz, 1H), 7.52 (q,  $J = 7.2$  Hz, 1H), 7.44 (dt,  $J = 15.5, 7.8$  Hz, 2H), 7.41 – 7.33 (m, 2H), 7.26 (s, 1H), 7.21 (d,  $J = 9.6$  Hz, 1H), 7.14 (td,  $J = 8.5, 2.0$  Hz, 1H), 3.79 – 3.68 (m, 1H), 3.63 (dp,  $J = 13.6, 6.7$  Hz, 1H), 1.75 (d,  $J = 6.8$  Hz, 3H), 1.66 (t,  $J = 13.5$  Hz, 3H), 1.12 (t,  $J = 6.8$  Hz, 3H), 1.08 (t,  $J = 11.7$  Hz, 3H).

**<sup>13</sup>C NMR (126 MHz, CDCl<sub>3</sub>)** δ 169.96 (s), 163.64 (s), 161.68 (s), 142.56 (d, *J* = 7.6 Hz), 139.13 (s), 136.72 (s), 131.56 (s), 130.00 – 129.64 (m), 126.64 (s), 126.28 (s), 126.06 (s), 125.79 (d, *J* = 2.8 Hz), 125.31 (s), 121.52 (s), 117.08 (s), 116.91 (s), 114.38 (s), 114.21 (s), 51.12 (s), 46.05 (s), 20.74 (dd, *J* = 18.2, 11.6 Hz).

**<sup>19</sup>F NMR (471 MHz, CDCl<sub>3</sub>)** δ -113.35 (s).

**HRMS (*m/z*):** [M+H<sup>+</sup>] calcd for C<sub>23</sub>H<sub>25</sub>FNO: 350.1875; found, 350.1878

**TLC:** R<sub>f</sub> = 0.05 (80:20 petroleum ether:EtOAc).

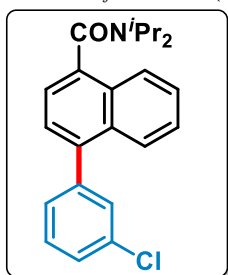

**4-(3-chlorophenyl)-*N,N*-diisopropyl-1-naphthamide:** Compound **6c** was prepared by general procedure B

**Eluent:** petroleum ether/ethyl acetate (80/20, v/v).

**Physical State:** White solid.

**Yield:** 53%

**<sup>1</sup>H NMR (500 MHz, CDCl<sub>3</sub>)** δ 7.92 (t, *J* = 7.3 Hz, 1H), 7.85 (t, *J* = 5.8 Hz, 1H), 7.55 – 7.51 (m, 1H), 7.50 – 7.45 (m, 2H), 7.44 – 7.40 (m, 2H), 7.40 – 7.34 (m, 3H), 3.75 – 3.68 (m, 1H), 3.64 (td, *J* = 13.6, 6.8 Hz, 1H), 1.74 (t, *J* = 7.4 Hz, 3H), 1.67 (d, *J* = 6.9 Hz, 3H), 1.13 (t, *J* = 5.8 Hz, 3H), 1.08 (d, *J* = 6.7 Hz, 3H).

**<sup>13</sup>C NMR (126 MHz, CDCl<sub>3</sub>)** δ 169.96 (s), 142.12 (s), 138.93 (s), 136.68 (s), 134.15 (s), 131.52 (s), 129.99 (s), 129.83 (s), 129.53 (s), 128.23 (s), 127.53 (s), 126.68 (s), 126.33 (s), 126.01 (s), 125.26 (s), 121.49 (s), 51.14 (s), 46.05 (s), 20.70 (dd, *J* = 18.6, 10.7 Hz).

**HRMS (*m/z*):** [M+H<sup>+</sup>] calcd for C<sub>23</sub>H<sub>25</sub>ClNO: 366.1621; found, 366.1619

**TLC:** R<sub>f</sub> = 0.2 (80:20 petroleum ether:EtOAc).

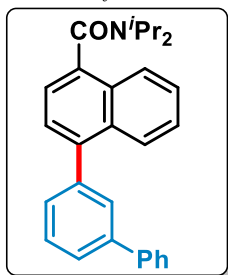

**4-([1,1'-biphenyl]-3-yl)-*N,N*-diisopropyl-1-naphthamide:** Compound **6d** was prepared by general procedure B

**Eluent:** petroleum ether/ethyl acetate (80/20, v/v).

**Physical State:** White solid.

**Yield:** 62%

**<sup>1</sup>H NMR (500 MHz, CDCl<sub>3</sub>)** δ 8.00 (d, *J* = 8.5 Hz, 1H), 7.95 (d, *J* = 8.3 Hz, 1H), 7.74 (d, *J* = 11.6 Hz, 1H), 7.68 (dd, *J* = 8.8, 7.9 Hz, 3H), 7.55 (ddd, *J* = 22.9, 11.5, 4.6 Hz, 2H), 7.52 – 7.43 (m, 5H), 7.42 – 7.34 (m, 2H), 3.82 – 3.71 (m, 1H), 3.70 – 3.59 (m, 1H), 1.77 (t, *J* = 6.7 Hz, 3H), 1.70 (d, *J* = 6.8 Hz, 3H), 1.12 (dt, *J* = 13.1, 6.5 Hz, 6H).

**<sup>13</sup>C NMR (126 MHz, CDCl<sub>3</sub>)** δ 170.14 (s), 141.18 (s), 140.83 (s), 140.37 (s), 136.28 (s), 131.79 (s), 129.88 (s), 128.81 (t, *J* = 12.4 Hz), 127.40 (s), 127.18 (s), 126.43 (dd, *J* = 18.1, 8.4 Hz), 126.13 (s), 125.20 (s), 121.58 (s), 51.13 (s), 46.02 (s), 20.72 (dd, *J* = 18.9, 11.6 Hz).

**HRMS (*m/z*):** [M+H<sup>+</sup>] calcd for C<sub>29</sub>H<sub>30</sub>NO: 408.2320; found, 408.2322

**TLC:**  $R_f = 0.1$  (80:20 petroleum ether:EtOAc).

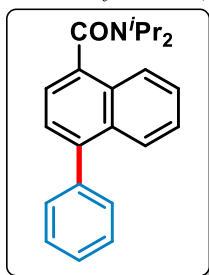

***N,N*-diisopropyl-4-phenyl-1-naphthamide:** Compound **6e** was prepared by general procedure B

**Eluent:** petroleum ether/ethyl acetate (80/20, v/v).

**Physical State:** White solid.

**Yield:** 49%

**$^1\text{H}$  NMR (500 MHz,  $\text{CDCl}_3$ )  $\delta$**  7.92 (d,  $J = 9.5$  Hz, 2H), 7.54 – 7.47 (m, 5H), 7.47 – 7.42 (m,  $J = 7.3, 5.2, 2.2$  Hz, 2H), 7.39 (dd,  $J = 19.3, 7.1$  Hz, 2H), 3.80 – 3.71 (m,  $J = 13.3, 6.7$  Hz, 1H), 3.66 – 3.59 (m,  $J = 13.7, 6.8$  Hz, 1H), 1.75 (d,  $J = 9.9, 5.8$  Hz, 3H), 1.68 (d,  $J = 6.8$  Hz, 3H), 1.13 (d,  $J = 6.7$  Hz, 3H), 1.09 (d,  $J = 5.3$  Hz, 3H).

**$^{13}\text{C}$  NMR (126 MHz,  $\text{CDCl}_3$ )  $\delta$**  170.17 (s), 140.41 (d,  $J = 18.1$  Hz), 136.18 (s), 131.77 (s), 129.93 (d,  $J = 17.6$  Hz), 128.25 (s), 127.36 (s), 126.37 (dd,  $J = 14.8, 10.2$  Hz), 125.17 (s), 121.57 (s), 51.11 (s), 46.00 (s), 20.90 (s), 20.73 (dd,  $J = 18.9, 12.0$  Hz).

**HRMS ( $m/z$ ):**  $[\text{M}+\text{H}^+]$  calcd for  $\text{C}_{23}\text{H}_{26}\text{NO}$ : 332.1970; found, 332.1972

**TLC:**  $R_f = 0.1$  (80:20 petroleum ether:EtOAc).

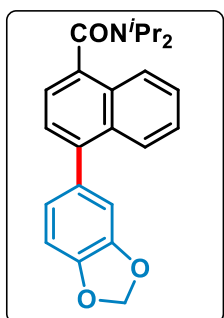

**4-(benzo[*d*][1,3]dioxol-5-yl)-*N,N*-diisopropyl-1-naphthamide:** Compound **6f** was prepared by general procedure B

**Eluent:** petroleum ether/ethyl acetate (80/20, v/v).

**Physical State:** White solid.

**Yield:** 47%

**$^1\text{H}$  NMR (500 MHz,  $\text{CDCl}_3$ )  $\delta$**  7.95 (d,  $J = 8.4$  Hz, 1H), 7.89 (d,  $J = 8.2$  Hz, 1H), 7.50 (tt,  $J = 11.6, 5.8$  Hz, 1H), 7.47 – 7.41 (m, 1H), 7.35 (dd,  $J = 18.4, 7.2$  Hz, 2H), 6.97 (s, 1H), 6.96 – 6.91 (m, 2H), 6.04 (s, 2H), 3.79 – 3.67 (m, 1H), 3.68 – 3.57 (m, 1H), 1.73 (t,  $J = 10.0$  Hz, 3H), 1.67 (d,  $J = 6.8$  Hz, 3H), 1.15 – 1.04 (m, 6H).

**$^{13}\text{C}$  NMR (126 MHz,  $\text{CDCl}_3$ )  $\delta$**  170.15 (s), 147.48 (s), 146.97 (s), 140.05 (s), 136.07 (s), 134.16 (s), 131.91 (s), 129.88 (s), 126.35 (t,  $J = 14.8$  Hz), 125.17 (s), 123.41 (s), 121.53 (s), 110.54 (s), 108.21 (s), 101.12 (s), 51.10 (s), 46.00 (s), 20.87 (s), 20.77 – 20.53 (m).

**HRMS ( $m/z$ ):**  $[\text{M}+\text{H}^+]$  calcd for  $\text{C}_{24}\text{H}_{26}\text{NO}_3$ : 376.1834; found, 376.1836

**TLC:**  $R_f = 0.2$  (80:20 petroleum ether:EtOAc).

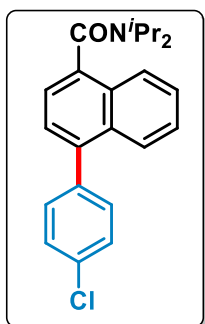

**4-(4-chlorophenyl)-N,N-diisopropyl-1-naphthamide:** Compound **6g** was prepared by general procedure B

**Eluent:** petroleum ether/ethyl acetate (80/20, v/v).

**Physical State:** White solid.

**Yield:** 51%

**<sup>1</sup>H NMR (500 MHz, CDCl<sub>3</sub>)**  $\delta$  7.91 (d,  $J = 8.3$  Hz, 1H), 7.85 (d,  $J = 8.4$  Hz, 1H), 7.55 – 7.51 (m, 1H), 7.49 – 7.45 (m, 3H), 7.42 (d,  $J = 8.4$  Hz, 2H), 7.38 – 7.34 (m, 2H), 3.73 (dp,  $J = 13.3, 6.6$  Hz, 1H), 3.68 – 3.57 (m, 1H), 1.75 (d,  $J = 6.8$  Hz, 3H), 1.67 (t,  $J = 6.4$  Hz, 3H), 1.12 (d,  $J = 6.7$  Hz, 3H), 1.09 (d,  $J = 6.7$  Hz, 3H).

**<sup>13</sup>C NMR (126 MHz, CDCl<sub>3</sub>)**  $\delta$  170.04 (s), 139.18 (s), 138.75 (s), 136.51 (s), 133.50 (s), 131.62 (s), 131.31 (s), 129.88 (s), 128.50 (s), 126.64 (d,  $J = 5.3$  Hz), 126.30 (s), 126.06 (s), 125.28 (s), 121.55 (s), 51.16 (s), 46.07 (s), 21.06 – 20.50 (m).

**HRMS ( $m/z$ ):** [M+H<sup>+</sup>] calcd for C<sub>23</sub>H<sub>25</sub>ClNO: 366.1621; found, 366.1619

**TLC:** R<sub>f</sub> = 0.2 (80:20 petroleum ether:EtOAc).

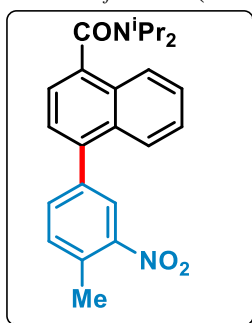

**N,N-diisopropyl-4-(4-methyl-3-nitrophenyl)-1-naphthamide:** Compound **6h** was prepared by general procedure B

**Eluent:** petroleum ether/ethyl acetate (80/20, v/v).

**Physical State:** White solid.

**Yield:** 57%

**<sup>1</sup>H NMR (500 MHz, CDCl<sub>3</sub>)**  $\delta$  8.12 (s, 1H), 7.93 (d,  $J = 8.2$  Hz, 1H), 7.81 (d,  $J = 8.3$  Hz, 1H), 7.64 (d,  $J = 7.6$  Hz, 1H), 7.55 (t,  $J = 7.4$  Hz, 1H), 7.48 (t,  $J = 7.4$  Hz, 2H), 7.39 (q,  $J = 7.0$  Hz, 2H), 3.70 (dt,  $J = 11.6, 5.7$  Hz, 1H), 3.63 (dt,  $J = 13.0, 6.5$  Hz, 1H), 2.71 (s, 3H), 1.75 (d,  $J = 6.6$  Hz, 3H), 1.67 (d,  $J = 6.6$  Hz, 3H), 1.13 (d,  $J = 6.5$  Hz, 3H), 1.09 (d,  $J = 6.5$  Hz, 3H).

**<sup>13</sup>C NMR (126 MHz, CDCl<sub>3</sub>)**  $\delta$  169.78 (s), 149.20 (s), 139.47 (s), 137.67 (s), 137.16 (s), 134.49 (s), 132.71 (d,  $J = 19.8$  Hz), 131.40 (s), 129.91 (s), 126.95 (d,  $J = 16.0$  Hz), 126.57 (s), 125.87 (s), 125.54 (d,  $J = 17.5$  Hz), 121.53 (s), 51.19 (s), 46.09 (s), 21.10 – 20.55 (m), 20.25 (s).

**HRMS ( $m/z$ ):** [M+H<sup>+</sup>] calcd for C<sub>26</sub>H<sub>30</sub>NO<sub>3</sub>: 404.22; found, 404.2218

**TLC:** R<sub>f</sub> = 0.3 (80:20 petroleum ether:EtOAc).

**Bromo substrate scope:**

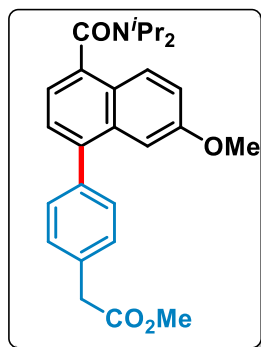

**Methyl 2-(4-(4-(diisopropylcarbamoyl)-7-methoxynaphthalen-1-yl)phenyl)acetate:**

Compound **7a** was prepared by general procedure B

**Eluent:** petroleum ether/ethyl acetate (80/20, v/v).

**Physical State:** yellowish liquid.

**Yield:** 61%

**<sup>1</sup>H NMR (500 MHz, CDCl<sub>3</sub>)**  $\delta$  7.84 (d,  $J$  = 9.1 Hz, 1H), 7.50 (d,  $J$  = 8.0 Hz, 2H), 7.43 (d, 2H), 7.36 (d,  $J$  = 7.2 Hz, 1H), 7.26 (s, 1H), 7.23 (d,  $J$  = 7.2 Hz, 1H), 7.21 (d,  $J$  = 9.1, 2.6 Hz, 1H), 3.79 (s, 3H), 3.78 (s, 3H), 3.76 (s, 2H), 3.73 (dd,  $J$  = 11.3, 6.9 Hz, 1H), 3.66 – 3.59 (m,  $J$  = 13.6, 6.8 Hz, 1H), 1.75 (d,  $J$  = 6.8 Hz, 3H), 1.68 (d,  $J$  = 6.8 Hz, 4H), 1.15 (d,  $J$  = 6.6 Hz, 3H), 1.10 (d,  $J$  = 6.7 Hz, 3H).

**<sup>13</sup>C NMR (126 MHz, CDCl<sub>3</sub>)**  $\delta$  172.07 (s), 170.29 (s), 157.93 (s), 139.52 (s), 138.81 (s), 136.11 (s), 133.06 (d,  $J$  = 4.4 Hz), 130.04 (s), 129.32 (s), 127.07 (s), 126.83 (s), 125.33 (s), 119.41 (s), 118.81 (s), 105.01 (s), 55.24 (s), 52.14 (s), 51.11 (s), 46.01 (s), 40.90 (s), 20.92 (s), 20.76 – 20.44 (m).

**HRMS ( $m/z$ ):** [M+K<sup>+</sup>] calcd for C<sub>27</sub>H<sub>31</sub>N<sub>2</sub>O<sub>4</sub>: 472.1895; found, 472.1885

**TLC:** R<sub>f</sub> = 0.2 (80:20 petroleum ether:EtOAc).

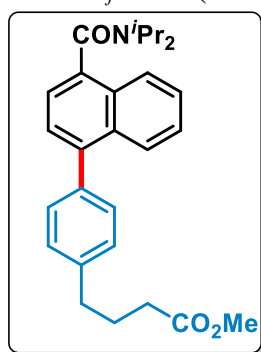

**Methyl 4-(4-(4-(diisopropylcarbamoyl)naphthalen-1-yl)phenyl)butanoate:** Compound **7b**

**Eluent:** petroleum ether/ethyl acetate (80/20, v/v).

**Physical State:** yellowish liquid.

**Yield:** 59%

**<sup>1</sup>H NMR (400 MHz, CDCl<sub>3</sub>)**  $\delta$  7.91 (t,  $J$  = 8.1 Hz, 2H), 7.51 (t, 1H), 7.47 – 7.33 (m, 5H), 7.31 (d,  $J$  = 8.0 Hz, 2H), 3.80 – 3.71 (m, 1H), 3.70 (s, 3H), 3.66 – 3.58 (m,  $J$  = 13.6 Hz, 1H), 2.76 (t,  $J$  = 7.6 Hz, 2H), 2.41 (t,  $J$  = 7.1 Hz, 2H), 2.11 – 2.01 (m, 2H), 1.75 (d,  $J$  = 6.8 Hz, 3H), 1.67 (d,  $J$  = 6.8 Hz, 3H), 1.12 (d,  $J$  = 6.7 Hz, 3H), 1.09 (d,  $J$  = 6.6 Hz, 3H).

**<sup>13</sup>C NMR (126 MHz, CDCl<sub>3</sub>)**  $\delta$  173.96 (s), 170.24 (s), 140.58 (s), 140.41 (s), 138.08 (s), 136.07 (s), 131.87 (s), 129.99 (d,  $J$  = 17.6 Hz), 128.41 (s), 126.56 – 126.13 (m), 125.19 (s), 121.62 (s), 51.57 (s), 51.13 (s), 46.03 (s), 34.89 (s), 33.47 (s), 29.68 (s), 26.48 (s), 20.92 (s), 20.78 – 20.58 (m).

**HRMS ( $m/z$ ):** [M+Na<sup>+</sup>] calcd for C<sub>28</sub>H<sub>33</sub>N<sub>2</sub>O<sub>4</sub>: 436.2270; found, 436.2271

**TLC:**  $R_f = 0.1$  (80:20 petroleum ether:EtOAc).

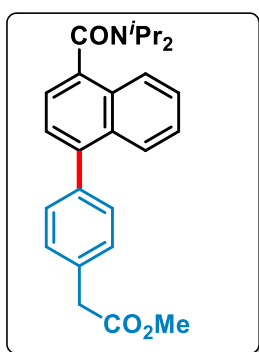

**Methyl 2-(4-(4-(diisopropylcarbamoyl)naphthalen-1-yl)phenyl)acetate:** Compound **7c** was prepared by general procedure B

**Eluent:** petroleum ether/ethyl acetate (80/20, v/v).

**Physical State:** yellowish liquid.

**Yield:** 63%

**$^1\text{H NMR}$  (500 MHz,  $\text{CDCl}_3$ )  $\delta$**  7.95 – 7.85 (m, 2H), 7.51 (t,  $J = 7.5$  Hz, 1H), 7.48 – 7.39 (m, 5H), 7.35 (dt,  $J = 14.4, 6.7$  Hz, 2H), 3.84 – 3.67 (m, 6H), 3.67 – 3.59 (m, 1H), 1.75 (d,  $J = 6.7$  Hz, 3H), 1.66 (d,  $J = 9.7$  Hz, 3H), 1.13 (d, 3H), 1.08 (d,  $J = 9.8$  Hz, 3H).

**$^{13}\text{C NMR}$  (126 MHz,  $\text{CDCl}_3$ )  $\delta$**  172.07 (s), 170.29 (s), 157.93 (s), 139.52 (s), 138.81 (s), 136.11 (s), 133.06 (d,  $J = 4.4$  Hz), 130.04 (s), 129.32 (s), 127.07 (s), 126.83 (s), 125.33 (s), 119.41 (s), 118.81 (s), 105.01 (s), 55.24 (s), 52.14 (s), 51.11 (s), 46.01 (s), 40.90 (s), 20.92 (s), 20.76 – 20.44 (m).

**HRMS ( $m/z$ ):**  $[\text{M}+\text{H}^+]$  calcd for  $\text{C}_{26}\text{H}_{30}\text{NO}_3$ : 404.2181; found, 404.2178

**TLC:**  $R_f = 0.1$  (80:20 petroleum ether:EtOAc).

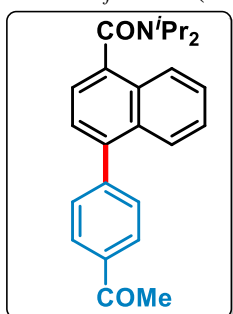

**4-(4-acetylphenyl)-N,N-diisopropyl-1-naphthamide:** Compound **7d** was prepared by general procedure B

**Eluent:** petroleum ether/ethyl acetate (80/20, v/v).

**Physical State:** Pale yellow solid .

**Yield:** 65%

**$^1\text{H NMR}$  (400 MHz,  $\text{CDCl}_3$ )  $\delta$**  8.09 (d,  $J = 8.2$  Hz, 1H), 7.93 (d,  $J = 8.2$  Hz, 1H), 7.85 (d,  $J = 8.4$  Hz, 1H), 7.60 (d,  $J = 8.1$  Hz, 1H), 7.54 (t,  $J = 7.2$  Hz, 1H), 7.46 (t,  $J = 7.3$  Hz, 1H), 7.39 (q,  $J = 7.2$  Hz, 1H), 3.78 – 3.68 (m, 1H), 3.63 (dt,  $J = 13.5, 6.8$  Hz, 1H), 2.69 (s, 1H), 1.75 (d,  $J = 6.8$  Hz, 1H), 1.67 (d,  $J = 6.8$  Hz, 2H), 1.13 (d,  $J = 6.6$  Hz, 1H), 1.09 (d,  $J = 6.7$  Hz, 1H).

**$^{13}\text{C NMR}$  (101 MHz,  $\text{CDCl}_3$ )  $\delta$**  197.84 (s), 169.91 (s), 145.38 (s), 139.26 (s), 136.93 (s), 136.12 (s), 131.43 (s), 130.31 (s), 129.92 (s), 128.38 (s), 126.76 (s), 126.33 (s), 125.99 (s), 125.38 (s), 121.55 (s), 51.17 (s), 46.09 (s), 26.71 (s), 20.90 (s), 20.74 (s), 20.68 (s).

**HRMS ( $m/z$ ):**  $[M+Na^+]$  calcd for  $C_{23}H_{24}N_2NaO_3$ : 399.1679; found, 399.1679

**TLC:**  $R_f = 0.4$  (80:20 petroleum ether:EtOAc).

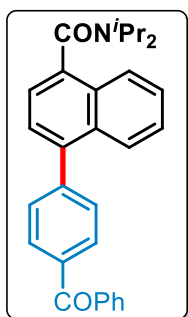

**4-(4-benzoylphenyl)-*N,N*-diisopropyl-1-naphthamide:** Compound **7e** was prepared by general procedure B

**Eluent:** petroleum ether/ethyl acetate (80/20, v/v).

**Physical State:** yellowish liquid.

**Yield:** 59%

**$^1H$  NMR (400 MHz,  $CDCl_3$ )  $\delta$**  8.04 – 7.84 (m, 6H), 7.63 (dd,  $J = 7.8, 6.0$  Hz, 3H), 7.57 – 7.46 (m, 4H), 7.42 (dd,  $J = 20.6, 7.2$  Hz, 2H), 3.79 – 3.67 (m, 1H), 3.69 – 3.59 (m,  $J = 13.5, 6.8$  Hz, 1H), 1.77 – 1.74 (d,  $J = 6.8$  Hz, 3H), 1.68 (d,  $J = 6.8$  Hz, 3H), 1.09 (dd, 6H).

**$^{13}C$  NMR (126 MHz,  $CDCl_3$ )  $\delta$**  196.45 (s), 169.96 (s), 144.75 (s), 139.36 (s), 137.63 (s), 136.89 (s), 136.57 (s), 132.50 (s), 131.49 (s), 130.05 (dd,  $J = 17.3, 11.5$  Hz), 128.36 (s), 126.77 (s), 126.40 (s), 126.07 (s), 125.37 (s), 121.58 (s), 51.19 (s), 46.10 (s), 20.91 (s), 20.71 (d,  $J = 7.6$  Hz).

**HRMS ( $m/z$ ):**  $[M+H^+]$  calcd for  $C_{30}H_{30}NO_2$ : 436.2270; found, 436.2271

**TLC:**  $R_f = 0.2$  (80:20 petroleum ether:EtOAc).

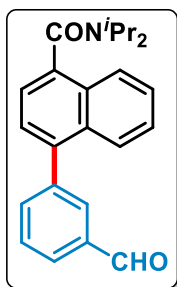

**4-(3-formylphenyl)-*N,N*-diisopropyl-1-naphthamide:** Compound **7f** was prepared by general procedure B

**Eluent:** petroleum ether/ethyl acetate (80/20, v/v).

**Physical State:** yellowish liquid.

**Yield:** 57%

**$^1H$  NMR (400 MHz,  $CDCl_3$ )  $\delta$**  10.12 (s, 1H), 8.01 (s, 1H), 7.97 (d,  $J = 7.7$  Hz, 1H), 7.93 (d,  $J = 8.2$  Hz, 1H), 7.81 (d,  $J = 8.3$  Hz, 1H), 7.77 (d,  $J = 7.5$  Hz, 1H), 7.68 (t,  $J = 7.6$  Hz, 1H), 7.54 (t, 1H), 7.47 (t, 1H), 7.40 (dd,  $J = 14.1, 7.1$  Hz, 2H), 3.77 – 3.67 (m, 1H), 3.68 – 3.59 (m,  $J = 13.7, 6.9$  Hz, 1H), 1.75 (d,  $J = 6.8$  Hz, 3H), 1.68 (d,  $J = 6.8$  Hz, 3H), 1.12 (d,  $J = 6.7$  Hz, 3H), 1.09 (d,  $J = 6.6$  Hz, 3H).

**$^{13}C$  NMR (126 MHz,  $CDCl_3$ )  $\delta$**  192.18 (s), 136.61 (s), 136.01 (s), 131.58 (s), 131.29 (s), 129.09 (s), 128.66 (s), 126.82 (d,  $J = 7.4$  Hz), 126.52 (s), 125.87 (s), 125.38 (d,  $J = 13.0$  Hz), 121.62 (s), 51.19 (s), 46.13 (s), 21.18 – 20.54 (m).

**HRMS ( $m/z$ ):**  $[M+H^+]$  calcd for  $C_{24}H_{26}NO_2$ : 360.1919; found, 360.1924

**TLC:**  $R_f = 0.3$  (80:20 petroleum ether:EtOAc).

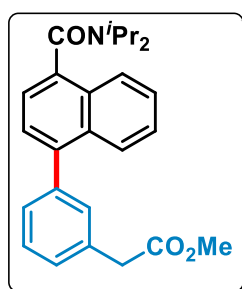

**methyl 2-(3-(4-(diisopropylcarbamoyl)naphthalen-1-yl)phenyl)acetate:** Compound **7g** was prepared by general procedure B

**Eluent:** petroleum ether/ethyl acetate (80/20, v/v).

**Physical State:** Pale yellow liquid.

**Yield:** 53%

**$^1\text{H}$  NMR (400 MHz,  $\text{CDCl}_3$ )  $\delta$**  7.90 (t,  $J = 8.2$  Hz, 2H), 7.51 (t,  $J = 7.6$  Hz, 1H), 7.48 – 7.43 (m, 2H), 7.40 (d,  $J = 8.2$  Hz, 3H), 7.35 (d,  $J = 6.9$  Hz, 2H), 3.79 – 3.66 (m, 6H), 3.62 (dt,  $J = 13.6, 6.9$  Hz, 1H), 1.75 (d,  $J = 6.8$  Hz, 3H), 1.67 (d,  $J = 6.8$  Hz, 3H), 1.16 – 1.10 (m, 3H), 1.08 (d,  $J = 6.7$  Hz, 3H).

**$^{13}\text{C}$  NMR (126 MHz,  $\text{CDCl}_3$ )  $\delta$**  172.07 (s), 170.29 (s), 157.93 (s), 139.52 (s), 138.81 (s), 136.11 (s), 133.06 (d,  $J = 4.4$  Hz), 130.04 (s), 129.32 (s), 127.07 (s), 126.83 (s), 125.33 (s), 119.41 (s), 118.81 (s), 105.01 (s), 55.24 (s), 52.14 (s), 51.11 (s), 46.01 (s), 40.90 (s), 20.92 (s), 20.76 – 20.44 (m).

**HRMS ( $m/z$ ):**  $[\text{M}+\text{Na}^+]$  calcd for  $\text{C}_{28}\text{H}_{33}\text{NNaO}_4$ : 436.2270; found, 436.2271

**TLC:**  $R_f = 0.1$  (80:20 petroleum ether:EtOAc).

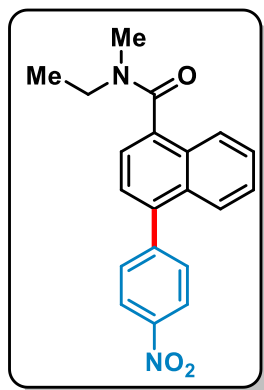

**N-ethyl-N-methyl-4-(4-nitrophenyl)-1-naphthamide:** Compound **8a** was prepared by general procedure B

**Eluent:** petroleum ether/ethyl acetate (80/20, v/v).

**Physical State:** Pale yellow solid.

**Yield:** 73%

**$^1\text{H}$  NMR (500 MHz, DMSO)  $\delta$**  8.95 (d,  $J = 8.6$  Hz, 3H), 8.38 (dd,  $J = 19.4, 8.8$  Hz, 8H), 8.31 (s, 2H), 8.21 (d,  $J = 7.4$  Hz, 3H), 8.08 (d,  $J = 8.9$  Hz, 2H), 7.79 (t,  $J = 9.1$  Hz, 9H), 7.74 – 7.68 (m, 3H), 7.63 – 7.55 (m, 6H), 3.38 (dd,  $J = 11.9, 4.9$  Hz, 9H), 1.21 – 1.14 (m, 4H), 1.09 (t,  $J = 7.0$  Hz, 9H).

**$^{13}\text{C}$  NMR (126 MHz, DMSO)  $\delta$**  168.96 (s), 147.60 (s), 146.76 (s), 142.19 (s), 131.63 (s), 131.37 (d,  $J = 18.2$  Hz), 129.46 (s), 129.19 (s), 128.15 (s), 127.51 (s), 126.68 (s), 126.52 (s), 126.09 (s), 124.71 (s), 124.17 (s), 79.64 (s), 65.39 (s), 15.63 (s).

**HRMS ( $m/z$ ):**  $[\text{M}+\text{H}^+]$  calcd for  $\text{C}_{20}\text{H}_{19}\text{N}_2\text{O}_3$ : 335.1351; found, 335.1361

**TLC:**  $R_f = 0.1$  (60:40 petroleum ether:EtOAc).

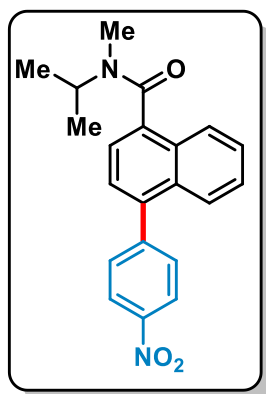

***N-isopropyl-N-methyl-4-(4-nitrophenyl)-1-naphthamide:*** Compound **8b** was prepared by general procedure B

**Eluent:** petroleum ether/ethyl acetate (80/20, v/v).

**Physical State:** Pale yellow solid .

**Yield:** 79%

**$^1\text{H NMR}$  (500 MHz,  $\text{CDCl}_3$ )  $\delta$**  8.35 (dd,  $J = 8.8, 1.5$  Hz, 2H), 7.91 – 7.82 (m, 1H), 7.78 (d,  $J = 8.5$  Hz, 1H), 7.70 – 7.62 (m, 2H), 7.59 – 7.52 (m, 1H), 7.51 – 7.47 (m, 1H), 7.46 – 7.40 (m, 2H), 3.90 – 3.63 (m,  $J = 6.6$  Hz, 1H), 3.12 (s, 3H), 1.19 – 1.05 (m, 6H).

**$^{13}\text{C NMR}$  (126 MHz,  $\text{CDCl}_3$ )  $\delta$**  170.07 (s), 147.29 (s), 147.08 (s), 131.16 (s), 130.88 (s), 129.97 (s), 127.37 – 127.01 (m), 126.44 (d,  $J = 6.5$  Hz), 125.80 – 125.42 (m), 125.18 (s), 123.62 (s), 122.85 (s), 122.23 (s), 49.93 (s), 25.71 (s), 20.61 (s), 20.20 (s).

**HRMS ( $m/z$ ):**  $[\text{M}+\text{H}^+]$  calcd for  $\text{C}_{21}\text{H}_{21}\text{N}_2\text{O}_3$ : 349.1507; found, 349.1510

**TLC:**  $R_f = 0.1$  (80:20 petroleum ether:EtOAc).

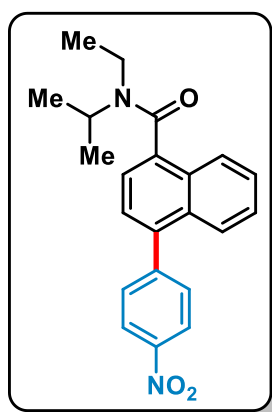

***N-ethyl-N-isopropyl-4-(4-nitrophenyl)-1-naphthamide:*** Compound **8c** was prepared by general procedure B

**Eluent:** petroleum ether/ethyl acetate (80/20, v/v).

**Physical State:** Pale yellow solid .

**Yield:** 73%

**$^1\text{H NMR}$  (500 MHz,  $\text{CDCl}_3$ )  $\delta$**  8.36 (d, 8H), 7.89 (dd,  $J = 25.4, 8.3$  Hz, 4H), 7.79 (d,  $J = 8.5$  Hz, 4H), 7.66 (d,  $J = 8.5$  Hz, 8H), 7.56 (t, 4H), 7.51 – 7.46 (m, 5H), 7.45 – 7.39 (m, 7H), 3.88 – 3.72 (m,  $J = 6.6$  Hz, 3H), 3.71 – 3.60 (m,  $J = 14.0, 7.0$  Hz, 3H), 3.58 – 3.45 (m, 3H), 1.45 (t,  $J = 13.5, 6.5$  Hz, 11H), 1.14 (d,  $J = 6.9$  Hz, 9H), 1.11 (d,  $J = 6.7$  Hz, 9H).

$^{13}\text{C}$  NMR (126 MHz,  $\text{CDCl}_3$ )  $\delta$  169.64 (s), 147.17 (d,  $J = 16.6$  Hz), 138.28 (s), 136.44 (s), 131.10 (s), 130.86 (s), 129.98 (s), 127.10 (d,  $J = 11.4$  Hz), 126.42 (s), 125.58 (s), 125.35 (s), 123.57 (s), 122.10 (s), 50.40 (s), 35.40 (s), 21.32 (s), 21.12 (s), 14.86 (s).

HRMS ( $m/z$ ):  $[\text{M}+\text{H}^+]$  calcd for  $\text{C}_{22}\text{H}_{23}\text{N}_2\text{O}_3$ :363.1664; found, 363.1675

TLC:  $R_f = 0.1$  (80:20 petroleum ether:EtOAc).

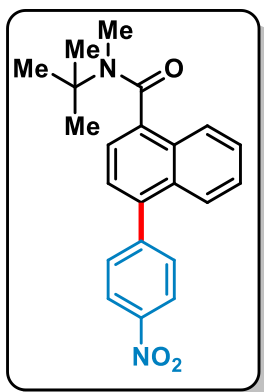

*N*-(*tert*-butyl)-*N*-methyl-4-(4-nitrophenyl)-1-naphthamide: Compound **8d** was prepared by general procedure B

Eluent: petroleum ether/ethyl acetate (80/20, v/v).

Physical State: Pale yellow solid .

Yield: 85%

$^1\text{H}$  NMR (500 MHz,  $\text{CDCl}_3$ )  $\delta$  8.37 (d,  $J = 8.4, 2.9$  Hz, 2H), 7.94 (d,  $J = 8.7$  Hz, 1H), 7.78 (d,  $J = 8.5$  Hz, 1H), 7.66 (d,  $J = 8.9, 2.2$  Hz, 2H), 7.57 (t,  $J = 7.6$  Hz, 1H), 7.52 – 7.47 (m, 1H), 7.47 – 7.39 (m,  $J = 11.5, 5.4$  Hz, 2H), 2.83 (s, 3H), 1.65 (s, 9H).

$^{13}\text{C}$  NMR (126 MHz,  $\text{CDCl}_3$ )  $\delta$  171.25 (s), 147.25 (s), 138.23 (s), 131.05 (d,  $J = 29.0$  Hz), 130.71 – 130.66 (m), 129.69 (s), 127.10 (d,  $J = 18.6$  Hz), 126.60 (s), 125.66 (s), 125.36 (s), 123.62 (s), 122.65 (s), 57.25 (s), 28.17 (s).

HRMS ( $m/z$ ):  $[\text{M}+\text{H}^+]$  calcd for  $\text{C}_{22}\text{H}_{23}\text{N}_2\text{O}_3$ :363.1664; found, 363.1675

TLC:  $R_f = 0.1$  (80:20 petroleum ether:EtOAc).

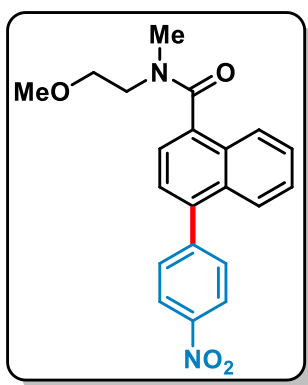

*N*-(2-methoxyethyl)-*N*-methyl-4-(4-nitrophenyl)-1-naphthamide: Compound **8e** was prepared by general procedure B

Eluent: petroleum ether/ethyl acetate (80/20, v/v).

Physical State: Pale yellow liquid .

Yield: 87%

$^1\text{H}$  NMR (500 MHz,  $\text{CDCl}_3$ )  $\delta$  8.37 (d, 8H), 7.92 (d,  $J = 21.1, 8.3$  Hz, 4H), 7.78 (t,  $J = 7.8$  Hz, 4H), 7.66 (d,  $J = 8.6$  Hz, 8H), 7.60 – 7.53 (m, 4H), 7.52 – 7.46 (m,  $J = 12.3, 6.8, 1.5$  Hz, 8H),

7.45 – 7.39 (m,  $J = 8.4, 7.3$  Hz, 4H), 3.88 – 3.68 (m,  $J = 22.0$  Hz, 2H), 3.48 (s, 2H), 3.43 – 3.36 (m,  $J = 4.7$  Hz, 2H), 3.34 – 3.16 (m, 2H), 2.93 (s, 2H).

$^{13}\text{C}$  NMR (126 MHz,  $\text{CDCl}_3$ )  $\delta$  170.52 (s), 147.30 (s), 147.09 (s), 138.71 (s), 135.81 (s), 135.45 (s), 131.09 (d,  $J = 7.7$  Hz), 130.89 (s), 130.06 (s), 129.71 (s), 127.36 – 126.95 (m), 126.41 (s), 126.25 (s), 125.60 (dd,  $J = 21.9, 12.2$  Hz), 123.55 (d,  $J = 16.0$  Hz), 123.10 (s), 70.59 (s), 58.86 (s), 47.06 (s), 38.25 (s).

HRMS ( $m/z$ ):  $[\text{M}+\text{Na}^+]$  calcd for  $\text{C}_{21}\text{H}_{21}\text{N}_2\text{O}_4$ : 365.1457; found, 365.1462

TLC:  $R_f = 0.1$  (60:40 petroleum ether:EtOAc).

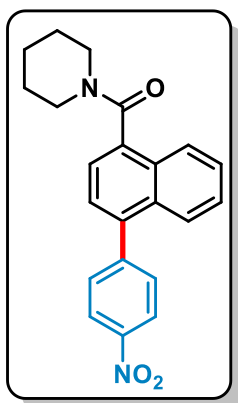

**4-(4-nitrophenyl)naphthalen-1-yl(piperidin-1-yl)methanone:** Compound **8f** was prepared by general procedure B

**Eluent:** petroleum ether/ethyl acetate (80/20, v/v).

**Physical State:** Pale yellow liquid.

**Yield:** 85%

$^1\text{H}$  NMR (500 MHz,  $\text{CDCl}_3$ )  $\delta$  8.36 (t,  $J = 6.7$  Hz, 2H), 7.93 (d,  $J = 8.3$  Hz, 1H), 7.78 (d,  $J = 8.6$  Hz, 1H), 7.65 (d,  $J = 8.6$  Hz, 2H), 7.57 (t,  $J = 7.2$  Hz, 1H), 7.50 (t,  $J = 10.9, 3.6$  Hz, 1H), 7.47 (d,  $J = 7.2$  Hz, 1H), 7.42 (d,  $J = 7.2$  Hz, 1H), 3.97 – 3.84 (m, 2H), 3.26 – 3.18 (m, 2H), 1.82 – 1.74 (m, 2H), 1.74 – 1.67 (m,  $J = 11.2, 5.6$  Hz, 2H), 1.46 (tt,  $J = 14.0, 6.9$  Hz, 2H).

$^{13}\text{C}$  NMR (126 MHz,  $\text{CDCl}_3$ )  $\delta$  168.78 (s), 147.31 (s), 147.11 (s), 138.61 (s), 135.73 (s), 131.11 (s), 130.88 (s), 129.96 (s), 128.31 (s), 127.17 (d,  $J = 2.1$  Hz), 126.40 (s), 125.60 (d,  $J = 13.2$  Hz), 124.35 (s), 123.63 (s), 122.76 (s), 48.36 (s), 42.73 (s), 26.72 (s), 25.80 (s), 24.51 (s).

HRMS ( $m/z$ ):  $[\text{M}+\text{H}^+]$  calcd for  $\text{C}_{22}\text{H}_{21}\text{N}_2\text{O}_3$ : 361.1508; found, 361.1511

TLC:  $R_f = 0.1$  (60:40 petroleum ether:EtOAc).

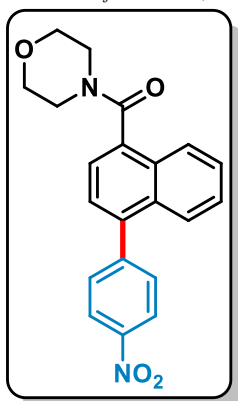

**Morpholino(4-(4-nitrophenyl)naphthalen-1-yl)methanone:** Compound **8g** was prepared by general procedure B

**Eluent:** petroleum ether/ethyl acetate (80/20, v/v).

**Physical State:** Pale yellow liquid.

**Yield:** 96%

**<sup>1</sup>H NMR (500 MHz, CDCl<sub>3</sub>)**  $\delta$  8.35 (d,  $J = 12.5, 5.4$  Hz, 2H), 7.93 (d,  $J = 12.3$  Hz, 1H), 7.79 (d,  $J = 8.4$  Hz, 1H), 7.64 (d,  $J = 8.6$  Hz, 2H), 7.60 (t, 1H), 7.55 – 7.47 (m,  $J = 7.2, 6.4, 2.3$  Hz, 2H), 7.44 (d,  $J = 7.2$  Hz, 1H), 4.08 – 4.01 (m,  $J = 12.8, 4.5$  Hz, 1H), 3.96 – 3.81 (m,  $J = 16.2, 9.4, 4.9$  Hz, 3H), 3.63 – 3.50 (m, 2H), 3.35 – 3.22 (m, 2H).

**<sup>13</sup>C NMR (126 MHz, CDCl<sub>3</sub>)**  $\delta$  169.02 (s), 147.34 (s), 146.82 (s), 139.10 (s), 134.47 (s), 131.09 (s), 130.82 (s), 129.86 (s), 128.28 (s), 127.37 (d,  $J = 13.6$  Hz), 126.31 (s), 125.80 (s), 125.18 (s), 124.31 (s), 123.63 (s), 123.21 (s), 66.97 (d,  $J = 14.0$  Hz), 47.60 (s), 42.19 (s).

**HRMS ( $m/z$ ):** [M+H<sup>+</sup>] calcd for C<sub>21</sub>H<sub>19</sub>N<sub>2</sub>O<sub>4</sub>: 363.1301; found, 363.1310

**TLC:** R<sub>f</sub> = 0.1 (50:50 petroleum ether:EtOAc).

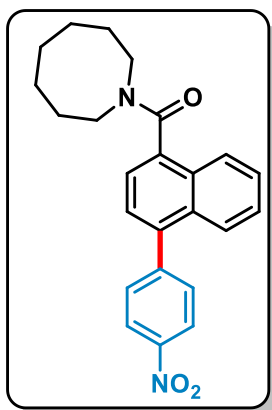

**azocan-1-yl(4-(4-nitrophenyl)naphthalen-1-yl)methanone:** Compound **8h** was prepared by general procedure B

**Eluent:** petroleum ether/ethyl acetate (80/20, v/v).

**Physical State:** Pale yellow liquid.

**Yield:** 75%

**<sup>1</sup>H NMR (500 MHz, CDCl<sub>3</sub>)**  $\delta$  8.35 (t,  $J = 7.8$  Hz, 2H), 7.91 (d,  $J = 8.4$  Hz, 1H), 7.78 (d,  $J = 8.4$  Hz, 1H), 7.65 (d,  $J = 8.4$  Hz, 2H), 7.57 (t,  $J = 7.5$  Hz, 1H), 7.48 (dd,  $J = 14.7, 7.3$  Hz, 2H), 7.42 (d,  $J = 7.2$  Hz, 1H), 4.01 – 3.88 (m, 1H), 3.82 – 3.71 (m, 1H), 3.38 – 3.19 (m, 2H), 2.07 – 1.82 (m,  $J = 22.7, 17.3, 4.3$  Hz, 3H), 1.80 – 1.61 (m, 4H), 1.55 (s, 3H).

**<sup>13</sup>C NMR (126 MHz, CDCl<sub>3</sub>)**  $\delta$  170.27 (s), 147.25 (s), 147.09 (s), 138.44 (s), 136.21 (s), 131.09 (s), 130.86 (s), 129.84 (s), 128.28 (s), 127.13 (d,  $J = 2.3$  Hz), 126.32 (s), 125.58 (d,  $J = 4.1$  Hz), 124.30 (s), 123.58 (s), 122.74 (s), 49.45 (s), 45.73 (s), 29.28 (s), 27.90 (s), 27.53 (s), 26.40 (s).

**HRMS ( $m/z$ ):** [M+H<sup>+</sup>] calcd for C<sub>24</sub>H<sub>25</sub>N<sub>2</sub>O<sub>3</sub>: 398.1820; found, 398.1825

**TLC:** R<sub>f</sub> = 0.1 (80:20 petroleum ether:EtOAc).

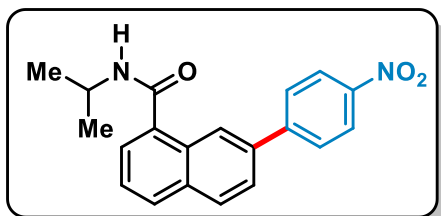

**N-isopropyl-7-(4-nitrophenyl)-1-naphthamide:** Compound **9a** was prepared by general procedure B

**Eluent:** petroleum ether/ethyl acetate (80/20, v/v).

**Physical State:** Pale yellow solid.

**Yield:** 75%

**<sup>1</sup>H NMR (500 MHz, CDCl<sub>3</sub>)** δ 8.67 (s, 1H), 8.35 (d, *J* = 8.8 Hz, 2H), 8.01 (d, *J* = 6.1 Hz, 1H), 7.98 (d, *J* = 7.1 Hz, 1H), 7.90 (d, *J* = 8.8 Hz, 2H), 7.81 (d, *J* = 8.5, 1.7 Hz, 1H), 7.66 (t, *J* = 6.7 Hz, 2H), 7.54 (t, 1H), 5.94 (d, *J* = 7.8 Hz, 1H), 4.48 – 4.44 (m, 1H), 1.36 (d, 6H).

**<sup>13</sup>C NMR (126 MHz, CDCl<sub>3</sub>)** δ 168.47 (s), 147.38 (s), 147.18 (s), 137.12 (s), 135.13 (s), 133.48 (s), 130.89 (d, *J* = 13.5 Hz), 130.35 (s), 129.33 (s), 128.20 (s), 125.75 – 125.40 (m), 124.60 (s), 124.16 (s), 123.64 (d, *J* = 3.5 Hz), 42.10 (s), 22.89 (s).

**HRMS (*m/z*):** [M+Na<sup>+</sup>] calcd for C<sub>20</sub>H<sub>19</sub>N<sub>2</sub>O<sub>3</sub>: 335.1335; found, 335.1337

**TLC:** R<sub>f</sub> = 0.1 (70:30 petroleum ether:EtOAc).

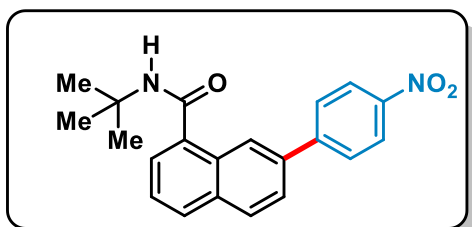

***N*-(tert-butyl)-7-(4-nitrophenyl)-1-naphthamide:** Compound **9b** was prepared by general procedure B

**Eluent:** petroleum ether/ethyl acetate (80/20, v/v).

**Physical State:** Pale yellow solid.

**Yield:** 87%

**<sup>1</sup>H NMR (500 MHz, CDCl<sub>3</sub>)** δ 8.59 (s, 1H), 8.33 (d, *J* = 8.7 Hz, 2H), 7.98 (d, *J* = 8.5 Hz, 1H), 7.94 (d, *J* = 8.1 Hz, 1H), 7.86 (d, *J* = 8.7 Hz, 2H), 7.77 (d, *J* = 8.4 Hz, 1H), 7.61 (d, *J* = 7.9 Hz, 1H), 7.50 (t, 1H), 5.88 (s, 1H), 1.55 (s, 9H).

**<sup>13</sup>C NMR (126 MHz, CDCl<sub>3</sub>)** δ 168.84 (s), 147.47 (s), 147.17 (s), 137.04 (s), 136.17 (s), 133.45 (s), 130.28 (s), 129.98 (s), 129.31 (s), 128.15 (s), 125.71 (s), 125.43 (s), 125.23 (s), 124.52 (s), 124.20 (s), 52.21 (s), 28.92 (s).

**HRMS (*m/z*):** [M+H<sup>+</sup>] C<sub>21</sub>H<sub>21</sub>N<sub>2</sub>O<sub>3</sub>: 349.1547; found, 349.1551.

**TLC:** R<sub>f</sub> = 0.2 (60:40 petroleum ether:EtOAc).

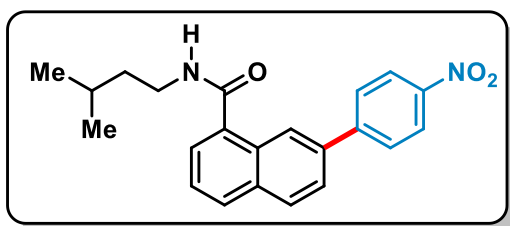

***N*-isopentyl-7-(4-nitrophenyl)-1-naphthamide:** Compound **9c** was prepared by general procedure B

**Eluent:** petroleum ether/ethyl acetate (80/20, v/v).

**Physical State:** Pale yellow solid.

**Yield:** 65%

**<sup>1</sup>H NMR (500 MHz, CDCl<sub>3</sub>)** δ 8.65 (s, 1H), 8.32 (d, *J* = 8.8 Hz, 2H), 7.99 (d, *J* = 8.5 Hz, 1H), 7.96 (d, *J* = 8.3 Hz, 1H), 7.87 (d, *J* = 8.8 Hz, 2H), 7.79 (d, *J* = 8.5, 1.8 Hz, 1H), 7.64 (t, *J* = 6.8, 3.8 Hz, 1H), 7.51 (t, *J* = 8.0, 7.2 Hz, 1H), 6.02 (s, 1H), 3.61 – 3.56 (m, 2H), 1.78 – 1.72 (m, 1H), 1.58 – 1.54 (m, 2H), 0.99 (d, *J* = 6.6 Hz, 6H).

**<sup>13</sup>C NMR (126 MHz, CDCl<sub>3</sub>)** δ 169.21 (s), 147.50 – 147.41 (m), 147.27 (d, *J* = 22.2 Hz), 137.16 (s), 135.09 (s), 133.49 (s), 130.38 (d, *J* = 4.7 Hz), 129.32 (s), 128.23 (s), 125.59 (d, *J* = 16.2 Hz), 124.66 (s), 124.13 (s), 38.50 (d, *J* = 11.6 Hz), 25.99 (s), 22.48 (s).

**HRMS (*m/z*):** [M+H<sup>+</sup>] calcd for C<sub>22</sub>H<sub>23</sub>N<sub>2</sub>O<sub>3</sub>: 363.1610; found, 362.1607

**TLC:** R<sub>f</sub> = 0.1 (70:30 petroleum ether:EtOAc).

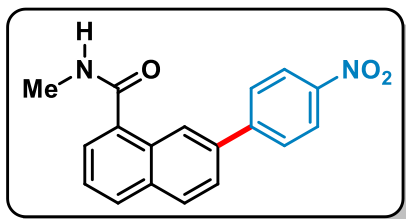

***N*-methyl-7-(4-nitrophenyl)-1-naphthamide:** Compound **9d** was prepared by general procedure B

**Eluent:** petroleum ether/ethyl acetate (80/20, v/v).

**Physical State:** white solid.

**Yield:** 73%

**<sup>1</sup>H NMR (400 MHz, CDCl<sub>3</sub>)** δ 8.67 (s, 1H), 8.33 (d, 2H), 7.98 (t, *J* = 10.6, 6.4 Hz, 2H), 7.88 (d, 2H), 7.79 (d, *J* = 8.5, 1.8 Hz, 1H), 7.66 (d, *J* = 7.1, 1.1 Hz, 1H), 7.52 (d, 1H), 6.08 (s, 1H), 3.13 (d, *J* = 4.9 Hz, 3H).

**<sup>13</sup>C NMR (126 MHz, CDCl<sub>3</sub>)** δ 169.91 (s), 147.39 (s), 137.26 (s), 134.85 (s), 133.54 (s), 130.54 (s), 129.33 (s), 128.30 (s), 127.09 (s), 126.42 (s), 125.63 (s), 125.58 (s), 125.44 (s), 124.84 (s), 124.75 (s), 124.15 (s), 26.96 (s).

**HRMS (*m/z*):** [M+H<sup>+</sup>] calcd for C<sub>18</sub>H<sub>15</sub>N<sub>2</sub>O<sub>3</sub>: 307.1025; found, 307.1030

**TLC:** R<sub>f</sub> = 0.1 (50:50 petroleum ether:EtOAc).

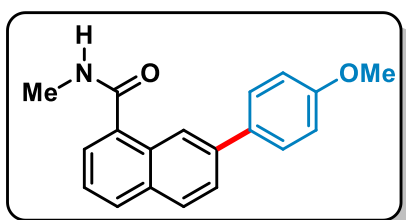

**7-(4-methoxyphenyl)-*N*-methyl-1-naphthamide:** Compound **9e** was prepared by general procedure B

**Eluent:** petroleum ether/ethyl acetate (80/20, v/v).

**Physical State:** Pale yellow solid.

**Yield:** 51%

**<sup>1</sup>H NMR (500 MHz, CDCl<sub>3</sub>)** δ 7.95 (d, *J* = 8.1 Hz, 1H), 7.86 (d, *J* = 8.1 Hz, 1H), 7.62 (d, *J* = 6.9 Hz, 1H), 7.53 (t, *J* = 7.6 Hz, 1H), 7.48 (t, *J* = 7.6 Hz, 1H), 7.43 (d, *J* = 7.0 Hz, 1H), 7.31 (d, *J* = 13.9 Hz, 2H), 6.96 (d, *J* = 8.2 Hz, 2H), 5.32 (d, *J* = 26.1 Hz, 1H), 3.86 (s, 3H), 2.35 (d, *J* = 7.3 Hz, 3H).

**<sup>13</sup>C NMR (101 MHz, CDCl<sub>3</sub>)** δ 170.86 (s), 158.72 (s), 139.09 (s), 135.44 (s), 134.91 (d, *J* = 6.5 Hz), 130.83 (s), 130.60 (s), 130.13 (s), 128.02 (d, *J* = 4.8 Hz), 125.74 (s), 124.97 (s), 113.50 (s), 55.33 (s), 26.28 (s).

**HRMS (*m/z*):** [M+H<sup>+</sup>] calcd for C<sub>19</sub>H<sub>18</sub>NO<sub>2</sub>: 292.1259; found, 292.1257

**TLC:** R<sub>f</sub> = 0.1 (60:40 petroleum ether:EtOAc).

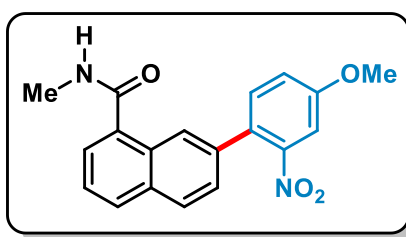

**7-(4-methoxy-2-nitrophenyl)-N-methyl-1-naphthamide:** Compound **9f** was prepared by general procedure B

**Eluent:** petroleum ether/ethyl acetate (80/20, v/v).

**Physical State:** Pale yellow solid.

**Yield:** 83%

**<sup>1</sup>H NMR (500 MHz, CDCl<sub>3</sub>)** δ 8.24 (s, 1H), 7.93 (d, *J* = 8.3 Hz, 1H), 7.87 (d, *J* = 8.4 Hz, 1H), 7.63 (d, *J* = 7.0 Hz, 1H), 7.47 (t, *J* = 7.9 Hz, 2H), 7.44 (d, *J* = 2.6 Hz, 1H), 7.41 (d, *J* = 8.4, 1.6 Hz, 1H), 7.18 (d, 1H), 6.07 (s, 1H), 3.92 (s, 3H), 3.07 (d, *J* = 6.5 Hz, 3H).

**<sup>13</sup>C NMR (126 MHz, CDCl<sub>3</sub>)** δ 170.04 (s), 159.32 (s), 136.13 (s), 134.67 (s), 133.34 (s), 132.88 (s), 130.38 (s), 130.08 (s), 128.56 (d, *J* = 4.8 Hz), 126.67 (s), 125.52 (s), 125.25 (s), 124.62 (s), 118.91 (s), 109.26 (s), 55.97 (s), 26.86 (s).

**HRMS (*m/z*):** [M+H<sup>+</sup>] calcd for C<sub>19</sub>H<sub>17</sub>N<sub>2</sub>O<sub>4</sub>: 337.1119; found, 337.1121

**TLC:** R<sub>f</sub> = 0.1 (60:40 petroleum ether:EtOAc).

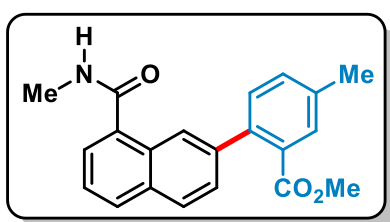

**Methyl 5-methyl-2-(8-(methylcarbamoyl)naphthalen-2-yl)benzoate:** Compound **9g** was prepared by general procedure B

**Eluent:** petroleum ether/ethyl acetate (80/20, v/v).

**Physical State:** Pale yellow solid.

**Yield:** 63%

**<sup>1</sup>H NMR (500 MHz, CDCl<sub>3</sub>)** δ 7.95 (d, *J* = 8.2, 1.0 Hz, 1H), 7.86 (d, *J* = 8.2, 0.9 Hz, 1H), 7.73 – 7.65 (m, 2H), 7.50 (t, *J* = 8.0, 7.3 Hz, 1H), 7.45 (t, *J* = 11.7, 5.8 Hz, 1H), 7.33 (d, *J* = 7.8, 1.0 Hz, 1H), 7.14 (d, *J* = 12.1 Hz, 2H), 6.29 (s, 1H), 3.67 (s, 3H), 2.43 (d, *J* = 8.7 Hz, 3H), 2.14 (d, *J* = 4.8 Hz, 3H).

**<sup>13</sup>C NMR (126 MHz, CDCl<sub>3</sub>)** δ 170.75 (s), 139.64 (s), 137.82 (s), 137.00 (s), 135.27 (s), 134.64 (s), 132.13 (s), 131.27 (s), 130.72 (s), 129.84 (t, *J* = 10.9 Hz), 128.45 (s), 127.54 (s), 125.28 (d, *J* = 16.3 Hz), 52.26 (s), 25.96 (s), 20.95 (s).

**HRMS (*m/z*):** [M+H<sup>+</sup>] calcd for C<sub>21</sub>H<sub>20</sub>NO<sub>3</sub>: 334.1361; found, 334.1364

**TLC:** R<sub>f</sub> = 0.1 (70:30 petroleum ether:EtOAc).

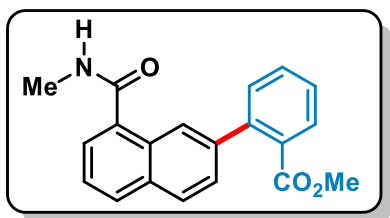

**Methyl 2-(8-(methylcarbamoyl)naphthalen-2-yl)benzoate:** Compound **9h** was prepared by general procedure B

**Eluent:** petroleum ether/ethyl acetate (80/20, v/v).

**Physical State:** Pale yellow solid.

**Yield:** 86%

**<sup>1</sup>H NMR (500 MHz, CDCl<sub>3</sub>)** δ 7.97 (d, 1H), 7.88 (t, *J* = 6.8 Hz, 2H), 7.70 (d, *J* = 6.8 Hz, 1H), 7.55 – 7.50 (m, 2H), 7.48 (t, 1H), 7.41 (td, *J* = 7.7, 1.0 Hz, 1H), 7.28 (d, *J* = 6.4 Hz, 1H), 7.18 (d, 1H), 6.29 (s, 1H), 3.69 (s, 3H), 2.13 (d, *J* = 4.8 Hz, 3H).

**<sup>13</sup>C NMR (126 MHz, CDCl<sub>3</sub>)** δ 170.67 (s), 142.45 (s), 137.85 (s), 135.27 (s), 134.66 (s), 131.44 (d, *J* = 3.9 Hz), 130.78 (s), 130.12 (s), 129.86 (s), 129.28 (s), 128.62 (d, *J* = 11.0 Hz), 127.42 (s), 127.23 (s), 125.34 (d, *J* = 6.0 Hz), 52.35 (s), 25.92 (s).

**HRMS (*m/z*):** [M+H<sup>+</sup>] calcd for C<sub>20</sub>H<sub>18</sub>NO<sub>3</sub>: 321.1237; found, 320.1232

**TLC:** R<sub>f</sub> = 0.1 (70:30 petroleum ether:EtOAc).

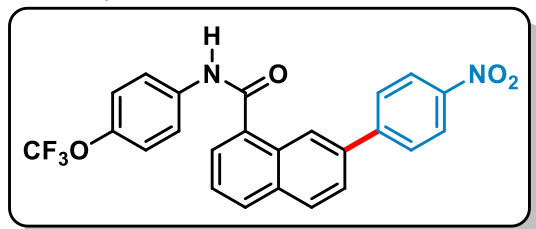

**7-(4-nitrophenyl)-N-(4-(trifluoromethoxy)phenyl)-1-naphthamide:** Compound **9i** was prepared by general procedure B

**Eluent:** petroleum ether/ethyl acetate (80/20, v/v).

**Physical State:** Pale yellow solid.

**Yield:** 64%

**<sup>1</sup>H NMR (500 MHz, CDCl<sub>3</sub>)** δ 8.69 (s, 1H), 8.30 (d, *J* = 8.7 Hz, 2H), 8.03 (dd, *J* = 8.4, 4.4 Hz, 2H), 7.88 – 7.83 (m, 3H), 7.83 – 7.80 (m, 2H), 7.73 (d, *J* = 8.5 Hz, 2H), 7.60 – 7.54 (m, 1H), 7.27 (d, *J* = 4.6 Hz, 1H).

**<sup>13</sup>C NMR (126 MHz, CDCl<sub>3</sub>)** δ 167.22 (s), 147.20 (d, *J* = 16.8 Hz), 137.68 (s), 136.47 (s), 133.60 (s), 131.35 (s), 130.35 (s), 129.50 (s), 128.29 (s), 125.90 (d, *J* = 4.0 Hz), 125.56 (s), 124.36 (s), 124.16 (s), 122.00 (s), 121.32 (s).

**<sup>19</sup>F NMR (471 MHz, CDCl<sub>3</sub>)** δ -58.08 (s).

**HRMS (*m/z*):** [M+H<sup>+</sup>] calcd for C<sub>24</sub>H<sub>16</sub>F<sub>3</sub>N<sub>2</sub>O<sub>3</sub>: 453.1017; found, 453.1020

**TLC:** R<sub>f</sub> = 0.05 (80:20 petroleum ether:EtOAc).

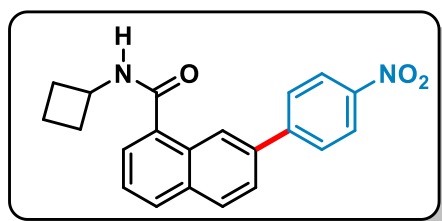

**N-cyclobutyl-7-(4-nitrophenyl)-1-naphthamide:** Compound **9j** was prepared by general procedure B

**Eluent:** petroleum ether/ethyl acetate (80/20, v/v).

**Physical State:** Pale yellow liquid.

**Yield:** 76%

**<sup>1</sup>H NMR (500 MHz, CDCl<sub>3</sub>)** δ 8.64 (s, 1H), 8.32 (d, *J* = 8.8 Hz, 2H), 7.98 (d, *J* = 8.5 Hz, 1H), 7.95 (d, *J* = 8.3 Hz, 1H), 7.86 (d, *J* = 8.8 Hz, 2H), 7.78 (d, *J* = 8.5, 1.7 Hz, 1H), 7.64 (d, 2H), 7.52 – 7.48 (m, 1H), 6.24 (d, *J* = 7.7 Hz, 1H), 4.78 – 4.67 (m, 1H), 2.54 – 2.49 (m, 2H), 2.03 – 1.97 (m, 2H), 1.83 – 1.78 (m, 2H).

**HRMS (*m/z*):** [M+Na<sup>+</sup>] calcd for C<sub>21</sub>H<sub>19</sub>N<sub>2</sub>O<sub>3</sub>: 347.1351; found, 347.1349

**TLC:** R<sub>f</sub> = 0.1 (80:20 petroleum ether:EtOAc).

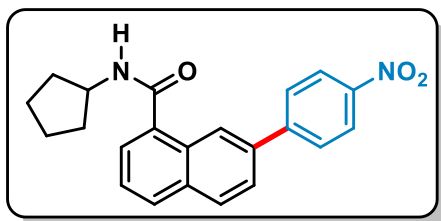

***N*-cyclopentyl-7-(4-nitrophenyl)-1-naphthamide:** Compound **9k** was prepared by general procedure B

**Eluent:** petroleum ether/ethyl acetate (80/20, v/v).

**Physical State:** Pale yellow solid.

**Yield:** 71%

**<sup>1</sup>H NMR (500 MHz, CDCl<sub>3</sub>)** δ 8.65 (s, 1H), 8.33 (d, *J* = 8.7 Hz, 2H), 7.98 (d, *J* = 8.5 Hz, 1H), 7.96 (d, *J* = 8.2 Hz, 1H), 7.87 (d, *J* = 8.7 Hz, 2H), 7.78 (d, *J* = 8.5, 1.6 Hz, 1H), 7.64 (d, *J* = 6.9 Hz, 1H), 7.51 (t, 1H), 6.02 (s, 1H), 4.59 – 4.49 (m, 1H), 2.26 – 2.11 (m, *J* = 12.5, 6.0 Hz, 2H), 1.82 – 1.65 (m, *J* = 24.3, 12.4 Hz, 5H), 1.59 – 1.52 (m, 2H).

**<sup>13</sup>C NMR (126 MHz, CDCl<sub>3</sub>)** δ 168.87 (s), 147.37 (s), 147.19 (s), 137.13 (s), 135.11 (s), 133.49 (s), 130.36 (s), 129.33 (s), 128.21 (s), 125.80 – 125.40 (m), 124.63 (s), 124.16 (s), 51.82 (s), 33.32 (s), 23.78 (s).

**HRMS (*m/z*):** [M+H<sup>+</sup>] calcd for C<sub>22</sub>H<sub>21</sub>N<sub>2</sub>O<sub>3</sub>: 361.1306; found, 331.1307

**TLC:** R<sub>f</sub> = 0.1 (80:20 petroleum ether:EtOAc).

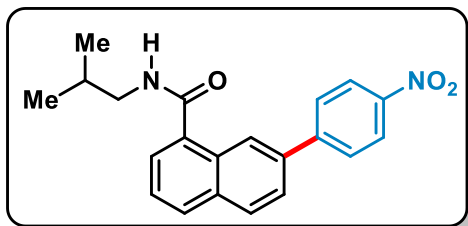

***N*-isobutyl-7-(4-nitrophenyl)-1-naphthamide:** Compound **9l** was prepared by general procedure B

**Eluent:** petroleum ether/ethyl acetate (80/20, v/v).

**Physical State:** Pale yellow solid.

**Yield:**

**<sup>1</sup>H NMR (500 MHz, CDCl<sub>3</sub>)** δ 8.65 (s, 1H), 8.32 (d, *J* = 8.8 Hz, 2H), 7.98 (dd, *J* = 12.2, 8.4 Hz, 2H), 7.87 (d, *J* = 8.8 Hz, 2H), 7.79 (d, *J* = 8.5, 1.7 Hz, 1H), 7.67 (d, *J* = 6.2 Hz, 1H), 7.52 (t, 1H), 6.12 (s, 1H), 3.40 (t, *J* = 6.5 Hz, 2H), 2.03 – 1.91 (m, 1H), 1.08 – 1.00 (m, 6H).

**<sup>13</sup>C NMR (126 MHz, CDCl<sub>3</sub>)** δ 169.33 (s), 147.35 (s), 147.19 (s), 137.18 (s), 135.19 (s), 133.50 (s), 130.40 (d, *J* = 5.4 Hz), 129.33 (s), 128.22 (s), 125.76 – 125.33 (m), 124.67 (s), 124.15 (s), 47.39 (s), 28.71 (s), 20.19 (s).

**HRMS (*m/z*):** [M+H<sup>+</sup>] calcd for C<sub>21</sub>H<sub>21</sub>N<sub>2</sub>O<sub>3</sub>: 349.1510; found, 349.1512

**TLC:** R<sub>f</sub> = 0.1 (60:40 petroleum ether:EtOAc).

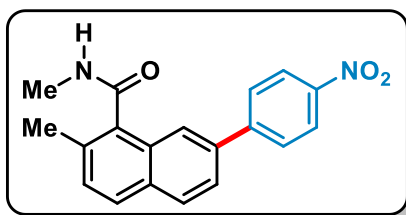

***N*,2-dimethyl-7-(4-nitrophenyl)-1-naphthamide:** Compound **9m** was prepared by general procedure B

**Eluent:** petroleum ether/ethyl acetate (80/20, v/v).

**Physical State:** Pale yellow solid.

**Yield:**

**<sup>1</sup>H NMR (500 MHz, CDCl<sub>3</sub>)** δ 8.31 (d, *J* = 8.8 Hz, 2H), 8.01 (s, 1H), 7.91 (d, *J* = 8.5 Hz, 1H), 7.83 – 7.79 (m, 3H), 7.68 (d, *J* = 8.5, 1.7 Hz, 1H), 7.35 (d, *J* = 8.4 Hz, 1H), 5.91 (d, *J* = 4.4 Hz, 1H), 3.14 (d, 3H), 2.52 (s, 3H).

**<sup>13</sup>C NMR (126 MHz, CDCl<sub>3</sub>)** δ 170.26 (s), 147.45 (s), 147.14 (s), 137.09 (s), 134.41 (s), 133.11 (s), 131.45 (s), 130.28 (s), 129.38 (s), 129.02 (s), 128.67 (s), 128.19 (s), 124.61 (s), 124.12 (s), 123.57 (s), 26.69 (s), 19.68 (s).

**HRMS (*m/z*):** [M+H<sup>+</sup>] calcd for C<sub>19</sub>H<sub>17</sub>N<sub>2</sub>O<sub>3</sub>: 321.1193; found, 321.1197

**TLC:** R<sub>f</sub> = 0.1 (60:40 petroleum ether:EtOAc).

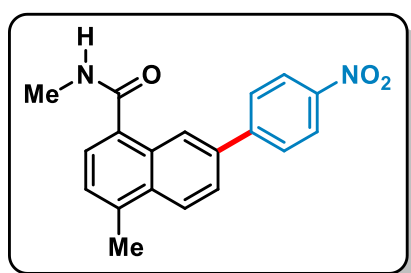

***N*,4-dimethyl-7-(4-nitrophenyl)-1-naphthamide:** Compound **9n** was prepared by general procedure B

**Eluent:** petroleum ether/ethyl acetate (80/20, v/v).

**Physical State:** Pale yellow solid.

**Yield:**

**<sup>1</sup>H NMR (500 MHz, CDCl<sub>3</sub>)** δ 8.71 (s, 1H), 8.32 (d, 2H), 8.14 (d, *J* = 8.8 Hz, 1H), 7.89 (d, 2H), 7.82 (d, *J* = 8.8, 1.9 Hz, 1H), 7.55 (d, 1H), 7.34 (d, *J* = 7.2 Hz, 1H), 3.11 (d, *J* = 4.9 Hz, 3H), 2.75 (s, 3H).

**<sup>13</sup>C NMR (126 MHz, CDCl<sub>3</sub>)** δ 170.15 (s), 147.32 (s), 137.47 (s), 136.69 (s), 133.16 (s), 132.68 (s), 130.55 (s), 128.22 (s), 126.29 (s), 125.46 (d, *J* = 1.9 Hz), 125.26 (d, *J* = 3.6 Hz), 124.13 (s), 26.95 (s), 19.73 (s).

**HRMS (*m/z*):** [M+H<sup>+</sup>] calcd for C<sub>19</sub>H<sub>17</sub>N<sub>2</sub>O<sub>3</sub>: 321.1193; found, 321.1197

**TLC:** R<sub>f</sub> = 0.1 (80:20 petroleum ether:EtOAc).

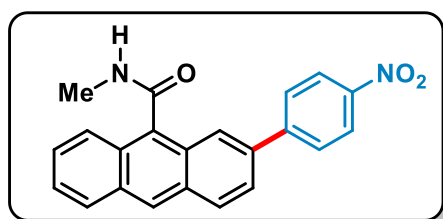

***N*-methyl-2-(4-nitrophenyl)anthracene-9-carboxamide:** Compound **9o** was prepared by general procedure B

**Eluent:** petroleum ether/ethyl acetate (80/20, v/v).

**Physical State:** Pale yellow solid.

**Yield:**

**<sup>1</sup>H NMR (500 MHz, CDCl<sub>3</sub>)** δ 8.46 (s, 1H), 8.33 (d, 2H), 8.23 (s, 1H), 8.08 (d, *J* = 8.5 Hz, 1H), 8.05 – 7.96 (m, 2H), 7.86 (d, 3H), 7.70 (d, 1H), 7.58 – 7.46 (m, 3H), 6.35 (s, 1H), 3.25 (d, 2H).

$^{13}\text{C}$  NMR (126 MHz,  $\text{CDCl}_3$ )  $\delta$  169.93 (s), 147.36–147.07 (m), 136.52 (s), 132.74 (s), 131.63 (s), 130.38 (s), 129.94 (s), 129.72 (s), 128.34–128.04 (m), 127.82 (s), 127.63 (s), 127.36 (s), 127.16 (s), 126.05 (s), 125.10 (s), 124.66 (s), 124.11 (d,  $J = 14.5$  Hz), 38.33 (s), 34.91 (s), 26.99 (s).

HRMS ( $m/z$ ):  $[\text{M}+\text{H}^+]$  calcd for  $\text{C}_{22}\text{H}_{17}\text{N}_2\text{O}_3$ : 357.11 found, 357.1192

TLC:  $R_f = 0.1$  (80:20 petroleum ether:EtOAc).

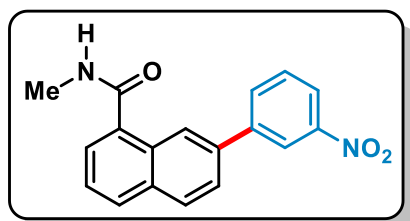

***N*-methyl-7-(3-nitrophenyl)-1-naphthamide:** Compound **9p** was prepared by general procedure B

**Eluent:** petroleum ether/ethyl acetate (80/20, v/v).

**Physical State:** Pale yellow solid.

**Yield:**

$^1\text{H}$  NMR (500 MHz,  $\text{CDCl}_3$ )  $\delta$  8.62 (s, 1H), 8.55 (s, 1H), 8.23 (d,  $J = 7.1$  Hz, 1H), 8.07 (d,  $J = 7.7$  Hz, 1H), 7.98 (dd,  $J = 13.2, 8.5$  Hz, 2H), 7.80 (d, 1H), 7.66 (d,  $J = 7.8$  Hz, 2H), 7.51 (t,  $J = 7.0$  Hz, 1H), 6.08 (s, 1H), 3.13 (d,  $J = 4.9$  Hz, 3H).

$^{13}\text{C}$  NMR (101 MHz,  $\text{CDCl}_3$ )  $\delta$  169.96 (s), 137.26 (s), 134.75 (s), 133.69 (s), 133.34 (s), 130.53 (s), 129.81 (s), 129.36 (s), 127.82 (s), 125.62 (s), 125.42 (s), 124.26 (s), 122.31 (d,  $J = 7.7$  Hz), 26.97 (s).

HRMS ( $m/z$ ):  $[\text{M}+\text{H}^+]$  calcd for  $\text{C}_{18}\text{H}_{15}\text{N}_2\text{O}_3$ : 307.1025; found, 307.1021

TLC:  $R_f = 0.1$  (80:20 petroleum ether:EtOAc).

### Kinetic Studies:

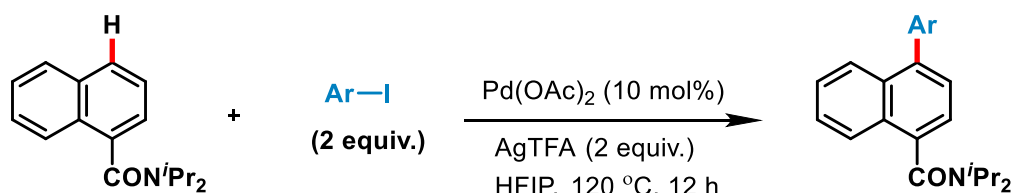

**Procedure:** In screw cap reaction tubes with previously placed stir bars were charged with  $\alpha$ -naphthamide (0.05 mmol, 12.76 mg), palladium (II) acetate (10 mol%, 0.005 mmol, 1.12 mg).

### Rate and order determination:

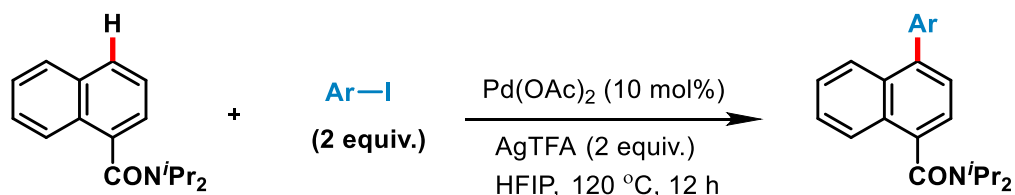

Let the rate of the reaction is as follows-

$$\text{So, Rate} = k. [\text{naphthamide}]^x [\text{aryliodide}]^y [\text{AgTFA}]^z \quad \text{-(1)}$$

**Substrate : Aryl iodide (1:2)**

| No.   | Substrate mmol | Aryl iodide (2 eqv.) mmol | Pd(OAc) <sub>2</sub> ( mol%) | AgTFA (equiv.) |
|-------|----------------|---------------------------|------------------------------|----------------|
| Run I | 0.05           | 0.1                       | 10                           | 1.5            |

| Sr. No. | Time (min) | Yield (%) |
|---------|------------|-----------|
| 1.      | 0          | 0         |
| 2.      | 3          | 1         |
| 3.      | 6          | 3         |
| 4.      | 9          | 5         |
| 5.      | 12         | 7         |
| 6.      | 15         | 10        |

**Substrate : Aryl iodide (1:1)**

| No.    | Substrate mmol | Aryl iodide (1 eqv.) mmol | Pd(OAc) <sub>2</sub> ( mol%) | AgTFA (equiv.) |
|--------|----------------|---------------------------|------------------------------|----------------|
| Run II | 0.05           | 0.05                      | 10                           | 1.5            |

| Sr. No. | Time (min) | Yield (%) |
|---------|------------|-----------|
| 1.      | 0          | 0         |
| 2.      | 3          | 1         |
| 3.      | 6          | 1.5       |
| 4.      | 9          | 2.5       |
| 5.      | 12         | 4         |
| 6.      | 15         | 6         |

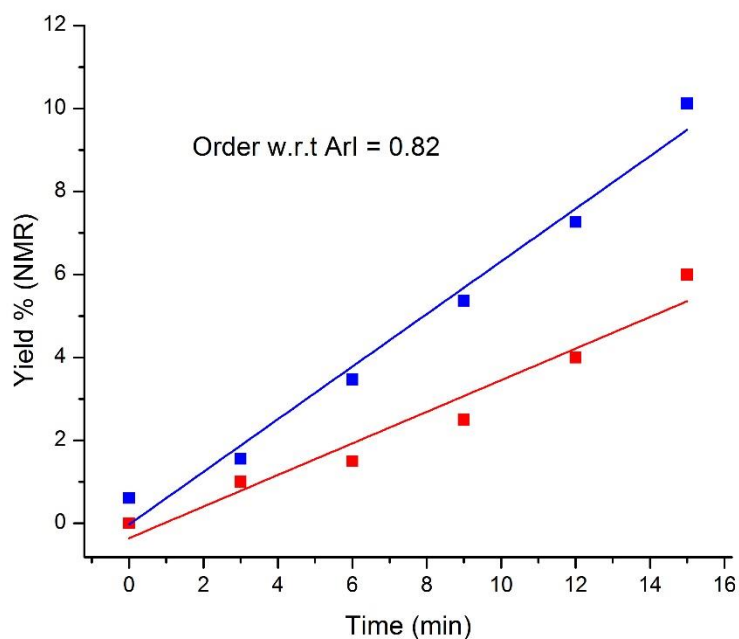

For run 1, initial rate = Rate<sub>1</sub>

$$\text{So, Rate}_1 = k. [\text{naphthamide}]^x [\text{aryliodide}]^y [\text{AgTFA}]^z$$

$$\text{Or, } 0.667 \text{ (mmol}^{-1} \cdot \text{min}^{-1}) = [0.05]^x [0.1]^y [0.1]^z \quad \text{-(2)}$$

For run 2, initial rate = Rate<sub>2</sub>

$$\text{So, Rate}_2 = k. [\text{naphthamide}]^x [\text{aryliodide}]^y [\text{AgTFA}]^z$$

$$\text{Or, } 0.38 \text{ (mmol}^{-1} \cdot \text{min}^{-1}) = [0.1]^x [0.1]^y [0.1]^z \quad \text{-(3)}$$

From eq. (2) and (3) we get,

$$\text{Rate}_2 / \text{Rate}_1 = [0.1 / 0.05]^x$$

$$\text{Or, } x = [\log(\text{Rate}_2) - \log(\text{Rate}_1)] / [\log(0.1) - \log(0.05)]$$

$$\text{Or, } x = [\log(0.667) - \log(0.381)] / [\log(0.1) - \log(0.05)]$$

$$\text{Or, } x = 0.82$$

So, order w.r.t naphthamide is 0.82

**Substrate : Aryl iodide (1.5:2)**

| No.     | Substrate mmol | Aryl iodide (2 eqv.) mmol | Pd(OAc) <sub>2</sub> ( mol%) | AgTFA (equiv.) |
|---------|----------------|---------------------------|------------------------------|----------------|
| Run III | 0.075          | 0.01                      | 10                           | 1.5            |

| Sr. No. | Time (min) | Yield (%) |
|---------|------------|-----------|
| 1.      | 0          | 0         |

|    |    |     |
|----|----|-----|
| 2. | 3  | 1   |
| 3. | 6  | 3   |
| 4. | 9  | 6   |
| 5. | 12 | 7.5 |
| 6. | 15 | 11  |

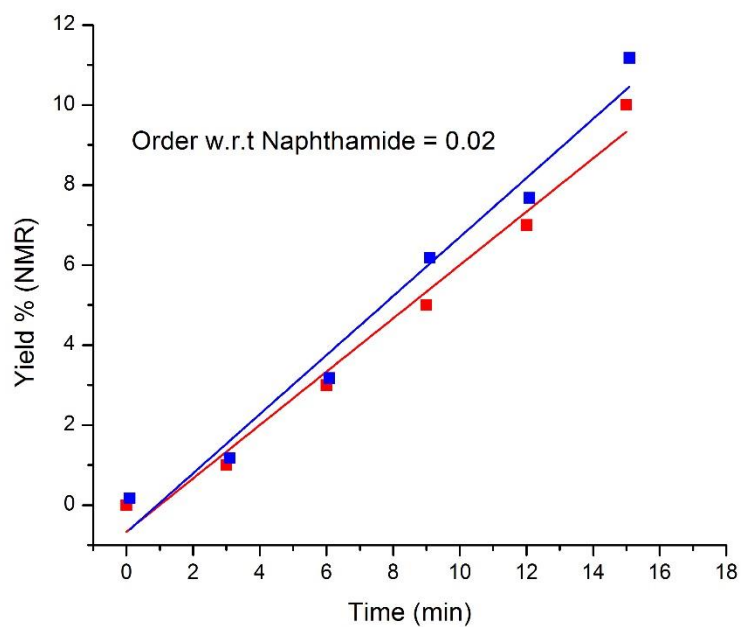

Using similar approach mentioned above, we obtain

$$y = [\log(0.7381) - \log(0.667)] / [\log(0.075) - \log(0.05)] = 0.02$$

So, order w.r.t ArI is 0.02

| No.    | Substrate mmol | Aryl iodide (1 eqv.) mmol | Pd(OAc) <sub>2</sub> ( mol%) | AgTFA (equiv.) |
|--------|----------------|---------------------------|------------------------------|----------------|
| Run II | 0.05           | 0.05                      | 10                           | 2              |

| Sr. No. | Time (min) | Yield (%) |
|---------|------------|-----------|
| 1.      | 0          | 0         |
| 2.      | 3          | 1.5       |
| 3.      | 6          | 3         |
| 4.      | 9          | 4         |
| 5.      | 12         | 6         |
| 6.      | 15         | 8         |

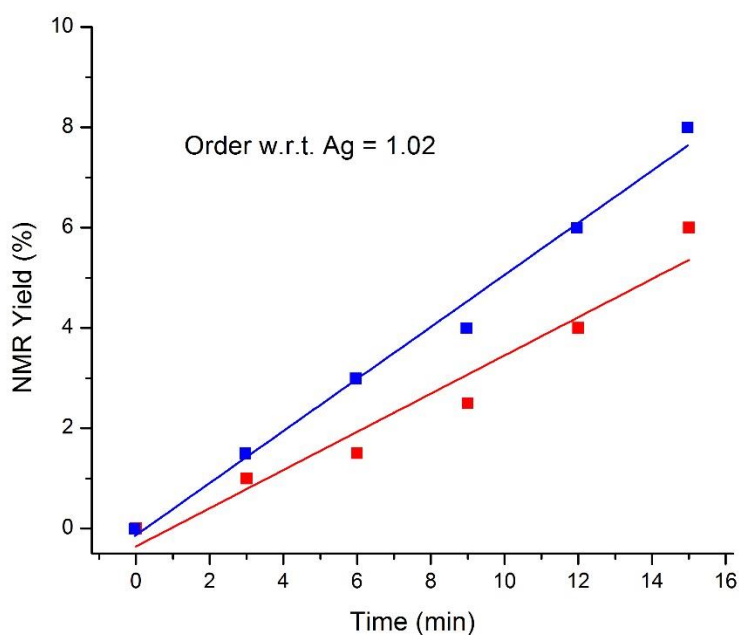

Using similar approach mentioned above, we obtain

$$z = [\log(0.519) - \log(0.38)] / [\log(0.1) - \log(0.075)] = 1.02$$

So, order w.r.t AgTFA is 1.02

### Order determination w.r.to palladium salt

Order of the catalyst is determined by using normalized time scale method.<sup>1</sup> Two sets of reactions were carried out with different concentration of the catalyst used.

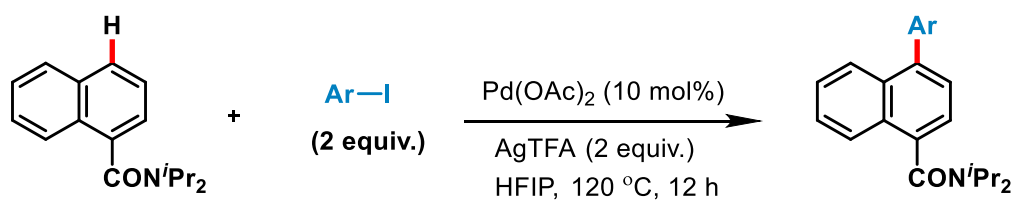

| No.           | Substrate mmol | Aryl iodide (2 equiv.) mmol | Pd(OAc) <sub>2</sub> (mol%) | AgTFA (equiv.) |
|---------------|----------------|-----------------------------|-----------------------------|----------------|
| <b>Run I</b>  | 0.05           | 0.1                         | 5 mol%                      | 1.5            |
| <b>Run II</b> | 0.05           | 0.1                         | 10 mol%                     | 1.5            |

#### Run I: (5 mol% palladium acetate)

| Sr. No. | Time (min) | Yield (%) |
|---------|------------|-----------|
|---------|------------|-----------|

|    |    |    |
|----|----|----|
| 1. | 0  | 0  |
| 2. | 3  | 1  |
| 3. | 6  | 1  |
| 4. | 9  | 2  |
| 5. | 12 | 3  |
| 6. | 15 | 5  |
| 7. | 30 | 11 |
| 8. | 45 | 16 |
| 9. | 60 | 21 |

**Run II: (10 mol% palladium acetate)**

| Sr. No. | Time (min) | Yield (%) |
|---------|------------|-----------|
| 1.      | 0          | 0         |
| 2.      | 3          | 1         |
| 3.      | 6          | 3         |
| 4.      | 9          | 5         |
| 5.      | 12         | 7         |
| 6.      | 15         | 10        |
| 7.      | 30         | 19        |
| 8.      | 45         | 27        |
| 9.      | 60         | 34        |

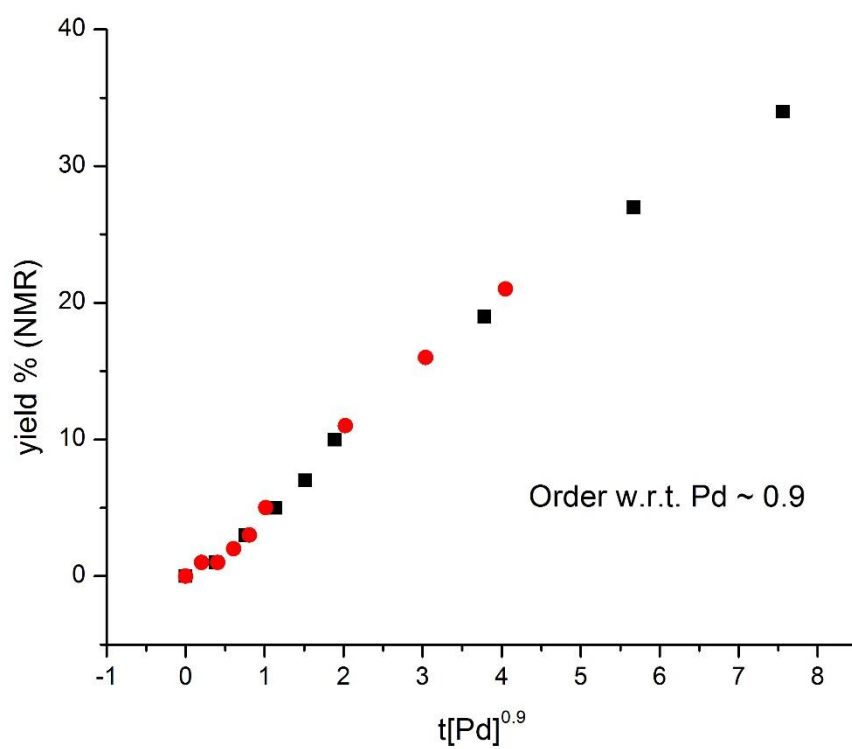

### Hammett plot:

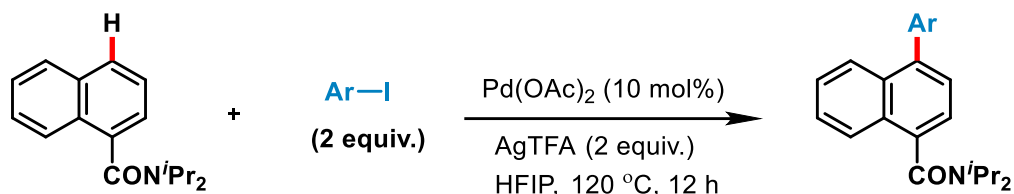

Rate with respect to different substrates are determined and plotted against reported sigma values.

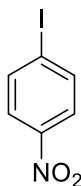

| Sr. No. | Time (min) | Yield (%) |
|---------|------------|-----------|
| 1.      | 0          | 0         |
| 2.      | 15         | 15        |
| 3.      | 30         | 22        |
| 4.      | 45         | 34        |
| 5.      | 60         | 42        |

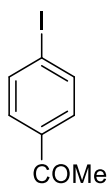

| Sr. No. | Time (min) | Yield (%) |
|---------|------------|-----------|
| 1.      | 0          | 0         |
| 2.      | 15         | 8         |
| 3.      | 30         | 14        |
| 4.      | 45         | 21        |
| 5.      | 60         | 30        |

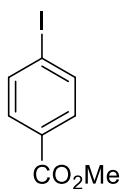

| Sr. No. | Time (min) | Yield (%) |
|---------|------------|-----------|
| 1.      | 0          | 0         |
| 2.      | 15         | 5         |
| 3.      | 30         | 12        |
| 4.      | 45         | 18        |
| 5.      | 60         | 25        |

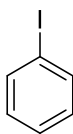

| Sr. No. | Time (min) | Yield (%) |
|---------|------------|-----------|
| 1.      | 0          | 0         |
| 2.      | 15         | 2         |
| 3.      | 30         | 5         |
| 4.      | 45         | 9         |
| 5.      | 60         | 12        |

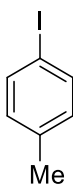

| Sr. No. | Time (min) | Yield (%) |
|---------|------------|-----------|
| 1.      | 0          | 0         |
| 2.      | 15         | 1         |
| 3.      | 30         | 3         |
| 4.      | 45         | 6         |
| 5.      | 60         | 9         |

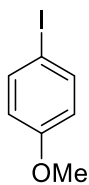

| Sr. No. | Time (min) | Yield (%) |
|---------|------------|-----------|
| 1.      | 0          | 0         |
| 2.      | 15         | 1         |
| 3.      | 30         | 3         |
| 4.      | 45         | 5         |
| 5.      | 60         | 7         |

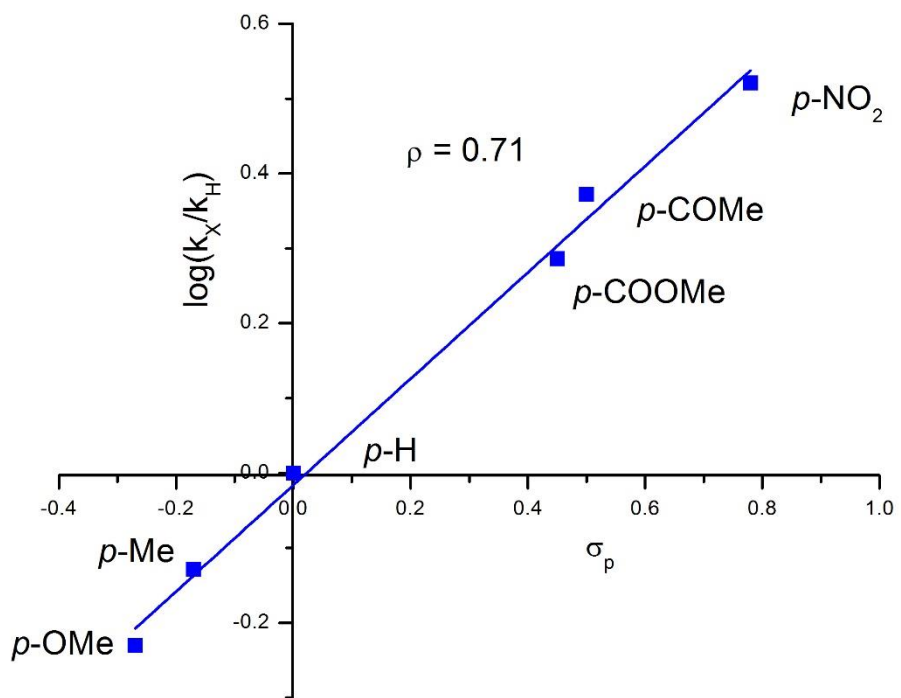

## Crystal Information:

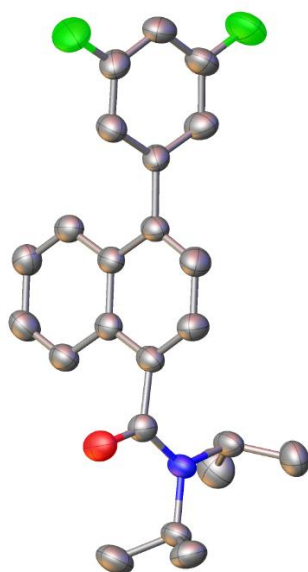

## Crystal Data of 3f CCDC 2132423:

| Crystal data and structure refinement for C <sub>23</sub> H <sub>23</sub> F <sub>2</sub> NO |                                                   |
|---------------------------------------------------------------------------------------------|---------------------------------------------------|
| Identification code                                                                         | <b>3f</b>                                         |
| Formula                                                                                     | C <sub>23</sub> H <sub>23</sub> F <sub>2</sub> NO |
| Formula weight(g/mol)                                                                       | 367.42                                            |
| Temperature/K                                                                               | 150 K                                             |
| Crystal system                                                                              | Monoclinic                                        |
| Space group                                                                                 | P 1 21/c 1                                        |
| a/Å                                                                                         | 17.568(2)                                         |
| b/Å                                                                                         | 7.5840(6)                                         |
| c/Å                                                                                         | 16.119(2)                                         |
| α/°                                                                                         | 90                                                |
| β/°                                                                                         | 112.022(14)                                       |
| γ/°                                                                                         | 90                                                |
| Volume/Å <sup>3</sup>                                                                       | 1991.0(4)                                         |
| Z                                                                                           | 9                                                 |
| P <sub>calc</sub> /cm <sup>3</sup>                                                          | 1.226                                             |
| μ/mm <sup>-1</sup>                                                                          | 0.087                                             |
| F(000)                                                                                      | 776.0                                             |
| Crystal size/mm <sup>3</sup>                                                                | 0.084 x 0.096 x 0.2                               |
| Radiation                                                                                   | MoKα (λ = 0.71073)                                |
| 2θ range for data collection/°                                                              | 2.501 to 33.707                                   |
| Goodness-of-fit on F <sup>2</sup>                                                           | 0.950                                             |
| R indices (all data)                                                                        | R1 = 0.0968, wR2 = 0.3276                         |
| Largest diff. peak and hole/ e Å <sup>-3</sup>                                              | 0.310 and -0.342                                  |

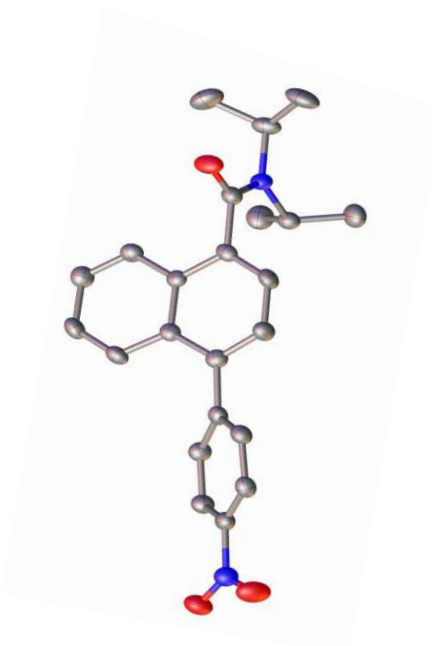

**Crystal Data of 3g CCDC 2132428:**

| <b>Crystal data and structure refinement for C<sub>23</sub>H<sub>24</sub>N<sub>2</sub>O<sub>3</sub></b> |                                                               |
|---------------------------------------------------------------------------------------------------------|---------------------------------------------------------------|
| Identification code                                                                                     | <b>3g</b>                                                     |
| Formula                                                                                                 | C <sub>23</sub> H <sub>24</sub> N <sub>2</sub> O <sub>3</sub> |
| Formula weight(g/mol)                                                                                   | 376.44                                                        |
| Temperature/K                                                                                           | 150 K                                                         |
| Crystal system                                                                                          | Monoclinic                                                    |
| Space group                                                                                             | P 1 21/c 1                                                    |
| a/Å                                                                                                     | 16.1993(13)                                                   |
| b/Å                                                                                                     | 7.6086(5)                                                     |
| c/Å                                                                                                     | 16.2787(12)                                                   |
| α/°                                                                                                     | 90                                                            |
| β/°                                                                                                     | 105.218(8)                                                    |
| γ/°                                                                                                     | 90                                                            |
| Volume/Å <sup>3</sup>                                                                                   | 1936.0(3)                                                     |
| Z                                                                                                       | 8                                                             |
| P <sub>calc</sub> /cm <sup>3</sup>                                                                      | 1.291                                                         |
| μ/mm <sup>-1</sup>                                                                                      | 0.086                                                         |
| F(000)                                                                                                  | 800.0                                                         |
| Crystal size/mm <sup>3</sup>                                                                            | 0.07 x 0.08 x 0.12                                            |
| Radiation                                                                                               | MoKα (λ = 0.71073)                                            |
| 2θ range for data collection/°                                                                          | 2.579 to 24.999                                               |
| Goodness-of-fit on F <sup>2</sup>                                                                       | 1.053                                                         |
| R indices (all data)                                                                                    | R1 = 0.0663, wR2 = 0.1762                                     |
| Largest diff. peak and hole/ e Å <sup>-3</sup>                                                          | 0.260 and -0.280                                              |

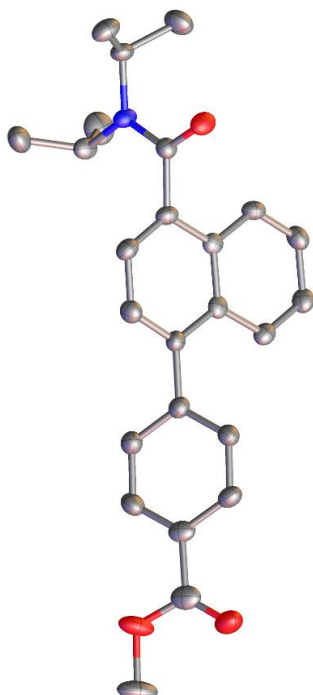

**Crystal Data of 3j CCDC 2132440:**

| <b>Crystal data and structure refinement for C<sub>25</sub>H<sub>27</sub>NO<sub>3</sub></b> |                                                 |
|---------------------------------------------------------------------------------------------|-------------------------------------------------|
| Identification code                                                                         | <b>3j</b>                                       |
| Formula                                                                                     | C <sub>25</sub> H <sub>27</sub> NO <sub>3</sub> |
| Formula weight(g/mol)                                                                       | 389.48                                          |
| Temperature/K                                                                               | 150 K                                           |
| Crystal system                                                                              | Monoclinic                                      |
| Space group                                                                                 | P 1 21/c 1                                      |
| a/Å                                                                                         | 18.0220(18)                                     |
| b/Å                                                                                         | 7.3120(6)                                       |
| c/Å                                                                                         | 16.2331(14)                                     |
| α/°                                                                                         | 90                                              |
| β/°                                                                                         | 101.134(9)                                      |
| γ/°                                                                                         | 90                                              |
| Volume/Å <sup>3</sup>                                                                       | 2098.9(3)                                       |
| Z                                                                                           | 9                                               |
| P <sub>calc</sub> /g/cm <sup>3</sup>                                                        | 1.232                                           |
| μ/mm <sup>-1</sup>                                                                          | 0.080                                           |
| F(000)                                                                                      | 832.0                                           |
| Crystal size/mm <sup>3</sup>                                                                | 0.062 x 0.078 x 0.08                            |
| Radiation                                                                                   | MoKα (λ = 0.71073)                              |
| 2θ range for data collection/°                                                              | 2.304 to 24.998                                 |
| Goodness-of-fit on F <sup>2</sup>                                                           | 1.060                                           |
| R indices (all data)                                                                        | R1 = 0.0703, wR2 = 0.2087                       |
| Largest diff. peak and hole/ e Å <sup>-3</sup>                                              | 0.381 and -0.394                                |

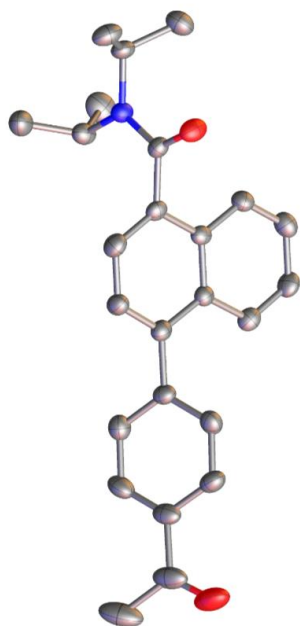

**Crystal Data of 3k CCDC 2132436:**

| <b>Crystal data and structure refinement for C<sub>25</sub>H<sub>27</sub>NO<sub>2</sub></b> |                                                 |
|---------------------------------------------------------------------------------------------|-------------------------------------------------|
| Identification code                                                                         | <b>3k</b>                                       |
| Formula                                                                                     | C <sub>25</sub> H <sub>27</sub> NO <sub>2</sub> |
| Formula weight(g/mol)                                                                       | 373.48                                          |
| Temperature/K                                                                               | 150 K                                           |
| Crystal system                                                                              | Monoclinic                                      |
| Space group                                                                                 | P 1 21/c 1                                      |
| a/Å                                                                                         | 17.8628(16)                                     |
| b/Å                                                                                         | 7.3882(5)                                       |
| c/Å                                                                                         | 16.1222(14)                                     |
| α/°                                                                                         | 90                                              |
| β/°                                                                                         | 104.518(9)                                      |
| γ/°                                                                                         | 90                                              |
| Volume/Å <sup>3</sup>                                                                       | 2059.8                                          |
| Z                                                                                           | 9                                               |
| P <sub>calc</sub> /cm <sup>3</sup>                                                          | 1.204                                           |
| μ/mm <sup>-1</sup>                                                                          | 0.076                                           |
| F(000)                                                                                      | 800.0                                           |
| Crystal size/mm <sup>3</sup>                                                                | 0.04 x 0.062 x 0.075                            |
| Radiation                                                                                   | MoKα (λ = 0.71073)                              |
| 2θ range for data collection/°                                                              | 2.356 to 25.000                                 |
| Goodness-of-fit on F <sup>2</sup>                                                           | 0.952                                           |
| R indices (all data)                                                                        | R1 = 0.0756, wR2 = 0.2949                       |
| Largest diff. peak and hole/ e Å <sup>-3</sup>                                              | 0.381 and -0.407                                |

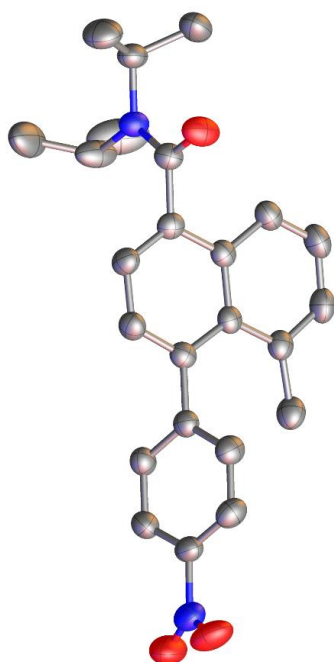

**Crystal Data of 3w CCDC 2132456:**

| Crystal data and structure refinement for C <sub>24</sub> H <sub>26</sub> N <sub>2</sub> O <sub>3</sub> |                                                               |
|---------------------------------------------------------------------------------------------------------|---------------------------------------------------------------|
| Identification code                                                                                     | <b>3w</b>                                                     |
| Formula                                                                                                 | C <sub>24</sub> H <sub>26</sub> N <sub>2</sub> O <sub>3</sub> |
| Formula weight(g/mol)                                                                                   | 390.47                                                        |
| Temperature/K                                                                                           | 150 K                                                         |
| Crystal system                                                                                          | Monoclinic                                                    |
| Space group                                                                                             | P 1 21/c 1                                                    |
| a/Å                                                                                                     | 12.9978(6)                                                    |
| b/Å                                                                                                     | 11.4277(6)                                                    |
| c/Å                                                                                                     | 14.5839(7)                                                    |
| α/°                                                                                                     | 90                                                            |
| β/°                                                                                                     | 93.368(4)                                                     |
| γ/°                                                                                                     | 90                                                            |
| Volume/Å <sup>3</sup>                                                                                   | 2162.48(18)                                                   |
| Z                                                                                                       | 9                                                             |
| P <sub>calc</sub> /cm <sup>3</sup>                                                                      | 1.199                                                         |
| μ/mm <sup>-1</sup>                                                                                      | 0.079                                                         |
| F(000)                                                                                                  | 832.0                                                         |
| Crystal size/mm <sup>3</sup>                                                                            | 0.05 x 0.06 x 0.08                                            |
| Radiation                                                                                               | MoKα (λ = 0.71073)                                            |
| 2θ range for data collection/°                                                                          | 2.3530 to 25.7420                                             |
| Goodness-of-fit on F <sup>2</sup>                                                                       | 1.001                                                         |
| R indices (all data)                                                                                    | R1 = 0.0836, wR2 = 0.2129                                     |
| Largest diff. peak and hole/ e Å <sup>-3</sup>                                                          | 0.201 and -0.256                                              |

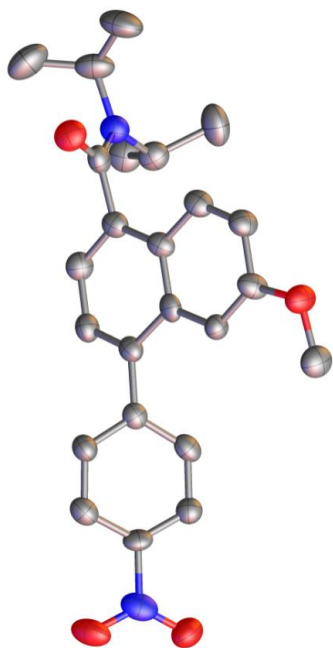

**Crystal Data of 3x CCDC 2133312:**

| Crystal data and structure refinement for C <sub>24</sub> H <sub>26</sub> N <sub>2</sub> O <sub>4</sub> |                                                               |
|---------------------------------------------------------------------------------------------------------|---------------------------------------------------------------|
| Identification code                                                                                     | 3x                                                            |
| Formula                                                                                                 | C <sub>24</sub> H <sub>26</sub> N <sub>2</sub> O <sub>4</sub> |
| Formula weight(g/mol)                                                                                   | 406.47                                                        |
| Temperature/K                                                                                           | 150 K                                                         |
| Crystal system                                                                                          | Orthorhombic                                                  |
| Space group                                                                                             | P 21 21 2                                                     |
| a/Å                                                                                                     | 15.2362(7)                                                    |
| b/Å                                                                                                     | 18.0958(7)                                                    |
| c/Å                                                                                                     | 7.8354(4)                                                     |
| α/°                                                                                                     | 90                                                            |
| β/°                                                                                                     | 90                                                            |
| γ/°                                                                                                     | 90                                                            |
| Volume/Å <sup>3</sup>                                                                                   | 2160.31(17)                                                   |
| Z                                                                                                       | 9                                                             |
| P <sub>calc</sub> /cm <sup>3</sup>                                                                      | 1.250                                                         |
| μ/mm <sup>-1</sup>                                                                                      | 0.692                                                         |
| F(000)                                                                                                  | 864.0                                                         |
| Crystal size/mm <sup>3</sup>                                                                            | 0.05 x 0.06 x 0.083                                           |
| Radiation                                                                                               | CuKα (λ = 1.54184)                                            |
| 2θ range for data collection/°                                                                          | 3.793 to 72.729                                               |
| Goodness-of-fit on F <sup>2</sup>                                                                       | 1.015                                                         |
| R indices (all data)                                                                                    | R1 = 0.0786, wR2 = 0.2273                                     |
| Largest diff. peak and hole/ e Å <sup>-3</sup>                                                          | 0.330 and -0.295                                              |

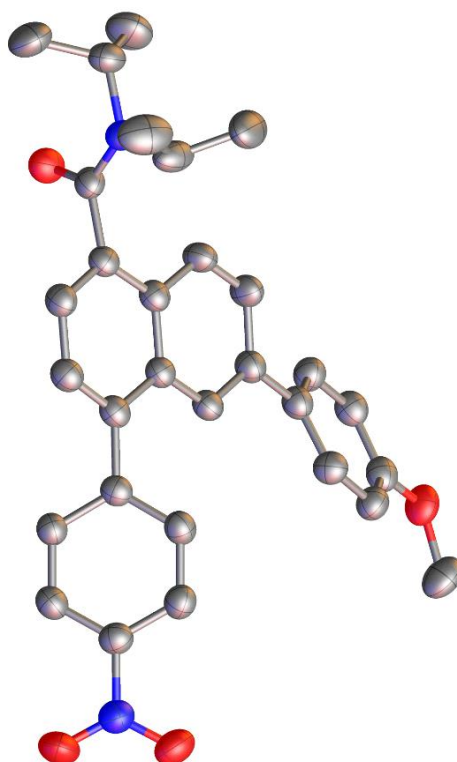

**Crystal Data of 3y CCDC 2132453:**

| Crystal data and structure refinement for C <sub>30</sub> H <sub>30</sub> N <sub>2</sub> O <sub>4</sub> |                                                               |
|---------------------------------------------------------------------------------------------------------|---------------------------------------------------------------|
| Identification code                                                                                     | 3y                                                            |
| Formula                                                                                                 | C <sub>30</sub> H <sub>30</sub> N <sub>2</sub> O <sub>4</sub> |
| Formula weight(g/mol)                                                                                   | 482.56                                                        |
| Temperature/K                                                                                           | 150 K                                                         |
| Crystal system                                                                                          | Monoclinic                                                    |
| Space group                                                                                             | P 1 21/c 1                                                    |
| a/Å                                                                                                     | 7.8353(2)                                                     |
| b/Å                                                                                                     | 22.0684(5)                                                    |
| c/Å                                                                                                     | 14.7710(4)                                                    |
| α/°                                                                                                     | 90                                                            |
| β/°                                                                                                     | 91.815(3)                                                     |
| γ/°                                                                                                     | 90                                                            |
| Volume/Å <sup>3</sup>                                                                                   | 2552.81(11)                                                   |
| Z                                                                                                       | 4                                                             |
| P <sub>calc</sub> /cm <sup>3</sup>                                                                      | 1.256                                                         |
| μ/mm <sup>-1</sup>                                                                                      | 0.670                                                         |
| F(000)                                                                                                  | 1024.0                                                        |
| Crystal size/mm <sup>3</sup>                                                                            | 0.062 x 0.096 x 0.115                                         |
| Radiation                                                                                               | CuKα (λ = 1.54184)                                            |
| 2θ range for data collection/°                                                                          | 3.602 to 72.760                                               |
| Goodness-of-fit on F <sup>2</sup>                                                                       | 1.036                                                         |
| R indices (all data)                                                                                    | R1 = 0.0774, wR2 = 0.2767                                     |
| Largest diff. peak and hole/ e Å <sup>-3</sup>                                                          | 0.481 and -0.436                                              |

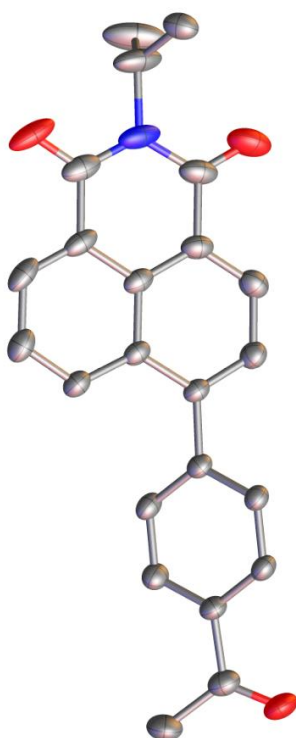

**Crystal Data of 3ab CCDC 2132457:**

| Crystal data and structure refinement for C <sub>23</sub> H <sub>19</sub> NO <sub>3</sub> |                                                 |
|-------------------------------------------------------------------------------------------|-------------------------------------------------|
| Identification code                                                                       | <b>3ab</b>                                      |
| Formula                                                                                   | C <sub>23</sub> H <sub>19</sub> NO <sub>3</sub> |
| Formula weight(g/mol)                                                                     | 357.39                                          |
| Temperature/K                                                                             | 150 K                                           |
| Crystal system                                                                            | Monoclinic                                      |
| Space group                                                                               | P 1 21/c 1                                      |
| a/Å                                                                                       | 13.1577(5)                                      |
| b/Å                                                                                       | 7.4286(3)                                       |
| c/Å                                                                                       | 18.3838(7)                                      |
| α/°                                                                                       | 90                                              |
| β/°                                                                                       | 99.340(4)                                       |
| γ/°                                                                                       | 90                                              |
| Volume/Å <sup>3</sup>                                                                     | 1773.07(12)                                     |
| Z                                                                                         | 8                                               |
| P <sub>calc</sub> /cm <sup>3</sup>                                                        | 1.339                                           |
| μ/mm <sup>-1</sup>                                                                        | 0.089                                           |
| F(000)                                                                                    | 752.0                                           |
| Crystal size/mm <sup>3</sup>                                                              | 0.09 x 0.11 x 0.12                              |
| Radiation                                                                                 | MoKα (λ = 0.71073)                              |
| 2θ range for data collection/°                                                            | 2.245 to 33.861                                 |
| Goodness-of-fit on F <sup>2</sup>                                                         | 1.069                                           |
| R indices (all data)                                                                      | R1 = 0.0933, wR2 = 0.2713                       |
| Largest diff. peak and hole/ e Å <sup>-3</sup>                                            | 1.170 and -0.853                                |

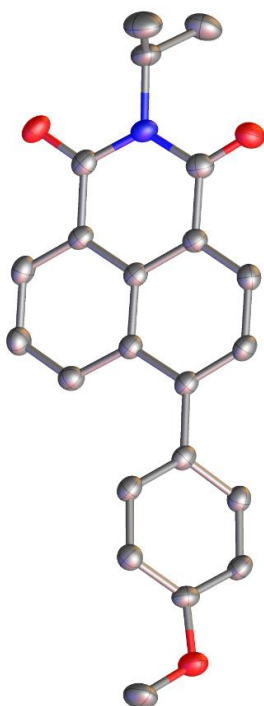

**Crystal Data of 3ac CCDC 2132378:**

| <b>Crystal data and structure refinement for C<sub>22</sub>H<sub>19</sub>NO<sub>3</sub></b> |                                                 |
|---------------------------------------------------------------------------------------------|-------------------------------------------------|
| Identification code                                                                         | <b>3ac</b>                                      |
| Formula                                                                                     | C <sub>22</sub> H <sub>19</sub> NO <sub>3</sub> |
| Formula weight(g/mol)                                                                       | 345.38                                          |
| Temperature/K                                                                               | 150 K                                           |
| Crystal system                                                                              | Monoclinic                                      |
| Space group                                                                                 | P 1 21/c 1                                      |
| a/Å                                                                                         | 13.5870(8)                                      |
| b/Å                                                                                         | 7.5797(4)                                       |
| c/Å                                                                                         | 17.5157(11)                                     |
| α/°                                                                                         | 90                                              |
| β/°                                                                                         | 105.850(7)                                      |
| γ/°                                                                                         | 90                                              |
| Volume/Å <sup>3</sup>                                                                       | 1735.28(18)                                     |
| Z                                                                                           | 7                                               |
| P <sub>calc</sub> /cm <sup>3</sup>                                                          | 1.322                                           |
| μ/mm <sup>-1</sup>                                                                          | 0.088                                           |
| F(000)                                                                                      | 728.0                                           |
| Crystal size/mm <sup>3</sup>                                                                | 0.06 x 0.08 x 0.09                              |
| Radiation                                                                                   | MoKα (λ = 0.71073)                              |
| 2θ range for data collection/°                                                              | 2.3960 to 29.3530                               |
| Goodness-of-fit on F <sup>2</sup>                                                           | 1.012                                           |
| R indices (all data)                                                                        | R1 = 0.0790, wR2 = 0.1797                       |
| Largest diff. peak and hole/ e Å <sup>-3</sup>                                              | 0.240 and -0.294                                |

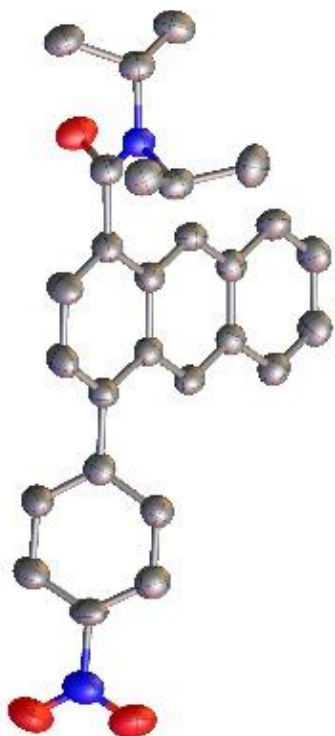

**Crystal Data of 3ai CCDC 2132449:**

| Crystal data and structure refinement for C <sub>27</sub> H <sub>26</sub> N <sub>2</sub> O <sub>3</sub> |                                                               |
|---------------------------------------------------------------------------------------------------------|---------------------------------------------------------------|
| Identification code                                                                                     | <b>3ai</b>                                                    |
| Formula                                                                                                 | C <sub>27</sub> H <sub>26</sub> N <sub>2</sub> O <sub>3</sub> |
| Formula weight(g/mol)                                                                                   | 426.50                                                        |
| Temperature/K                                                                                           | 150 K                                                         |
| Crystal system                                                                                          | Monoclinic                                                    |
| Space group                                                                                             | P 1 21/c 1                                                    |
| a/Å                                                                                                     | 26.1989(19)                                                   |
| b/Å                                                                                                     | 11.0262(9)                                                    |
| c/Å                                                                                                     | 8.0030(7)                                                     |
| α/°                                                                                                     | 90                                                            |
| β/°                                                                                                     | 92.355(7)                                                     |
| γ/°                                                                                                     | 90                                                            |
| Volume/Å <sup>3</sup>                                                                                   | 2309.9(3)                                                     |
| Z                                                                                                       | 10                                                            |
| P <sub>calc</sub> /cm <sup>3</sup>                                                                      | 1.226                                                         |
| μ/mm <sup>-1</sup>                                                                                      | 0.080                                                         |
| F(000)                                                                                                  | 904.0                                                         |
| Crystal size/mm <sup>3</sup>                                                                            | 0.09 x 0.1 x 0.12                                             |
| Radiation                                                                                               | MoKα (λ = 0.71073)                                            |
| 2θ range for data collection/°                                                                          | 2.004 to 33.998                                               |
| Goodness-of-fit on F <sup>2</sup>                                                                       | 0.969                                                         |
| R indices (all data)                                                                                    | R1 = 0.0819, wR2 = 0.2440                                     |
| Largest diff. peak and hole/ e Å <sup>-3</sup>                                                          | 0.229 and -0.260                                              |

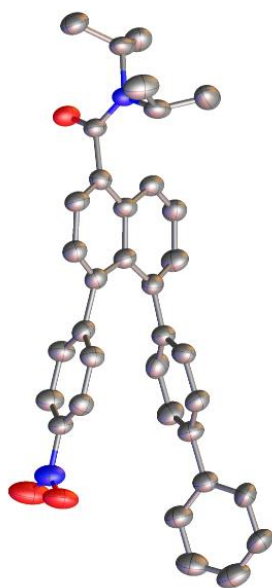

**Crystal Data of 3aj CCDC 2132455:**

| <b>Crystal data and structure refinement for C<sub>35</sub>H<sub>32</sub>N<sub>2</sub>O<sub>3</sub></b> |                                                               |
|---------------------------------------------------------------------------------------------------------|---------------------------------------------------------------|
| Identification code                                                                                     | <b>3aj</b>                                                    |
| Formula                                                                                                 | C <sub>35</sub> H <sub>32</sub> N <sub>2</sub> O <sub>3</sub> |
| Formula weight(g/mol)                                                                                   | 528.63                                                        |
| Temperature/K                                                                                           | 150 K                                                         |
| Crystal system                                                                                          | Monoclinic                                                    |
| Space group                                                                                             | P 1 21/c 1                                                    |
| a/Å                                                                                                     | 13.2962(5)                                                    |
| b/Å                                                                                                     | 15.7733(7)                                                    |
| c/Å                                                                                                     | 27.5418(11)                                                   |
| α/°                                                                                                     | 90                                                            |
| β/°                                                                                                     | 98.192(4)                                                     |
| γ/°                                                                                                     | 90                                                            |
| Volume/Å <sup>3</sup>                                                                                   | 5717.3(4)                                                     |
| Z                                                                                                       | 25                                                            |
| P <sub>calc</sub> /cm <sup>3</sup>                                                                      | 1.228                                                         |
| μ/mm <sup>-1</sup>                                                                                      | 0.619                                                         |
| F(000)                                                                                                  | 2240.0                                                        |
| Crystal size/mm <sup>3</sup>                                                                            | 0.02 x 0.04 x 0.13                                            |
| Radiation                                                                                               | CuKα (λ = 1.54184)                                            |
| 2θ range for data collection/°                                                                          | 3.237 to 72.965                                               |
| Goodness-of-fit on F <sup>2</sup>                                                                       | 0.988                                                         |
| R indices (all data)                                                                                    | R1 = 0.1050, wR2 = 0.3908                                     |
| Largest diff. peak and hole/ e Å <sup>-3</sup>                                                          | 0.533 and -0.472                                              |

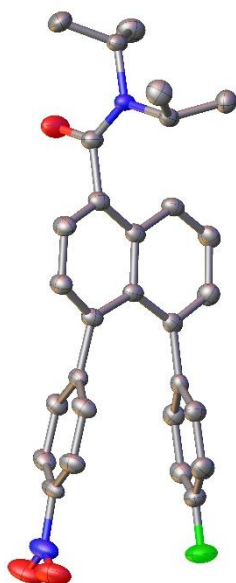

**Crystal Data of 3al CCDC 2133315:**

| <b>Crystal data and structure refinement for C<sub>29</sub>H<sub>27</sub>FN<sub>2</sub>O<sub>3</sub></b> |                                                                |
|----------------------------------------------------------------------------------------------------------|----------------------------------------------------------------|
| Identification code                                                                                      | <b>3al</b>                                                     |
| Formula                                                                                                  | C <sub>29</sub> H <sub>27</sub> FN <sub>2</sub> O <sub>3</sub> |
| Formula weight(g/mol)                                                                                    | 470.53                                                         |
| Temperature/K                                                                                            | 150 K                                                          |
| Crystal system                                                                                           | Monoclinic                                                     |
| Space group                                                                                              | P 1 21/c 1                                                     |
| a/Å                                                                                                      | 7.1271(4)                                                      |
| b/Å                                                                                                      | 24.7374(15)                                                    |
| c/Å                                                                                                      | 13.8207(9)                                                     |
| α/°                                                                                                      | 90                                                             |
| β/°                                                                                                      | 101.066(6)                                                     |
| γ/°                                                                                                      | 90                                                             |
| Volume/Å <sup>3</sup>                                                                                    | 2391.4(3)                                                      |
| Z                                                                                                        | 10                                                             |
| P <sub>calc</sub> /cm <sup>3</sup>                                                                       | 1.307                                                          |
| μ/mm <sup>-1</sup>                                                                                       | 0.090                                                          |
| F(000)                                                                                                   | 992.0                                                          |
| Crystal size/mm <sup>3</sup>                                                                             | 0.045 x 0.058 x 0.09                                           |
| Radiation                                                                                                | MoKα (λ = 0.71073)                                             |
| 2θ range for data collection/°                                                                           | 1.646 to 32.937                                                |
| Goodness-of-fit on F <sup>2</sup>                                                                        | 1.030                                                          |
| R indices (all data)                                                                                     | R1 = 0.0741, wR2 = 0.1790                                      |
| Largest diff. peak and hole/ e Å <sup>-3</sup>                                                           | 0.396 and -0.310                                               |

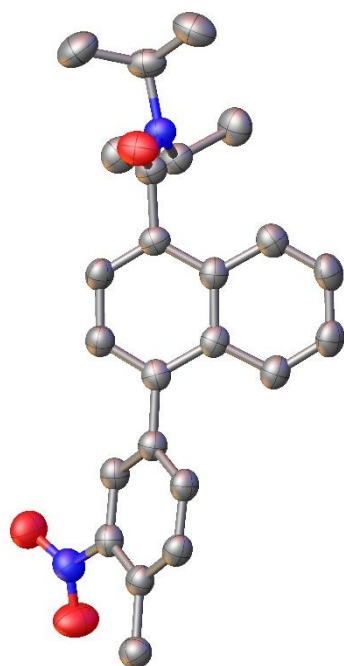

**Crystal Data of 6h CCDC 2133344:**

| <b>Crystal data and structure refinement for C<sub>24</sub>H<sub>26</sub>N<sub>2</sub>O<sub>3</sub></b> |                                                               |
|---------------------------------------------------------------------------------------------------------|---------------------------------------------------------------|
| Identification code                                                                                     | <b>6h</b>                                                     |
| Formula                                                                                                 | C <sub>24</sub> H <sub>26</sub> N <sub>2</sub> O <sub>3</sub> |
| Formula weight(g/mol)                                                                                   | 390.47                                                        |
| Temperature/K                                                                                           | 150 K                                                         |
| Crystal system                                                                                          | Orthorhombic                                                  |
| Space group                                                                                             | P b c a                                                       |
| a/Å                                                                                                     | 7.72750(10)                                                   |
| b/Å                                                                                                     | 22.4337(4)                                                    |
| c/Å                                                                                                     | 24.2544(5)                                                    |
| α/°                                                                                                     | 90                                                            |
| β/°                                                                                                     | 90                                                            |
| γ/°                                                                                                     | 90                                                            |
| Volume/Å <sup>3</sup>                                                                                   | 4204.66(13)                                                   |
| Z                                                                                                       | 18                                                            |
| P <sub>calc</sub> /cm <sup>3</sup>                                                                      | 1.234                                                         |
| μ/mm <sup>-1</sup>                                                                                      | 0.653                                                         |
| F(000)                                                                                                  | 1664.0                                                        |
| Crystal size/mm <sup>3</sup>                                                                            | 0.08 x 0.092 x 0.099                                          |
| Radiation                                                                                               | CuKα (λ = 1.54184)                                            |
| 2θ range for data collection/°                                                                          | 3.941 to 72.708                                               |
| Goodness-of-fit on F <sup>2</sup>                                                                       | 1.074                                                         |
| R indices (all data)                                                                                    | R1 = 0.0693, wR2 = 0.2512                                     |
| Largest diff. peak and hole/ e Å <sup>-3</sup>                                                          | 0.431 and -0.491                                              |

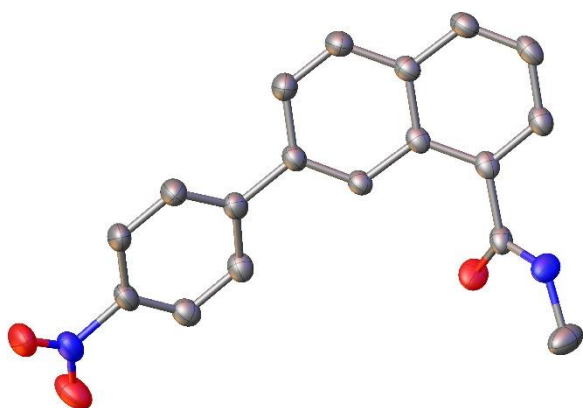

**Crystal Data of 9d CCDC 2133343:**

| Crystal data and structure refinement for C <sub>18</sub> H <sub>14</sub> N <sub>2</sub> O <sub>3</sub> |                                                               |
|---------------------------------------------------------------------------------------------------------|---------------------------------------------------------------|
| Identification code                                                                                     | <b>9d</b>                                                     |
| Formula                                                                                                 | C <sub>18</sub> H <sub>14</sub> N <sub>2</sub> O <sub>3</sub> |
| Formula weight(g/mol)                                                                                   | 306.31                                                        |
| Temperature/K                                                                                           | 150 K                                                         |
| Crystal system                                                                                          | Monoclinic                                                    |
| Space group                                                                                             | P 1 21/c 1                                                    |
| a/Å                                                                                                     | 4.9733(2)                                                     |
| b/Å                                                                                                     | 15.3701(6)                                                    |
| c/Å                                                                                                     | 19.3784(9)                                                    |
| α/°                                                                                                     | 90                                                            |
| β/°                                                                                                     | 92.471(4)                                                     |
| γ/°                                                                                                     | 90                                                            |
| Volume/Å <sup>3</sup>                                                                                   | 1479.91(11)                                                   |
| Z                                                                                                       | 6                                                             |
| P <sub>calc</sub> /g/cm <sup>3</sup>                                                                    | 1.375                                                         |
| μ/mm <sup>-1</sup>                                                                                      | 0.095                                                         |
| F(000)                                                                                                  | 640.0                                                         |
| Crystal size/mm <sup>3</sup>                                                                            | 0.05 x 0.06 x 0.12                                            |
| Radiation                                                                                               | MoKα (λ = 0.71073)                                            |
| 2θ range for data collection/°                                                                          | 1.6820 to 24.8970                                             |
| Goodness-of-fit on F <sup>2</sup>                                                                       | 1.034                                                         |
| R indices (all data)                                                                                    | R1 = 0.0756, wR2 = 0.1836                                     |
| Largest diff. peak and hole/ e Å <sup>-3</sup>                                                          | 0.316 and -0.257                                              |

**Reference:**

1. Burés, J. *Angew. Chem. Int. Ed.* **55**, 2028 (2016)

# NMR Spectra of

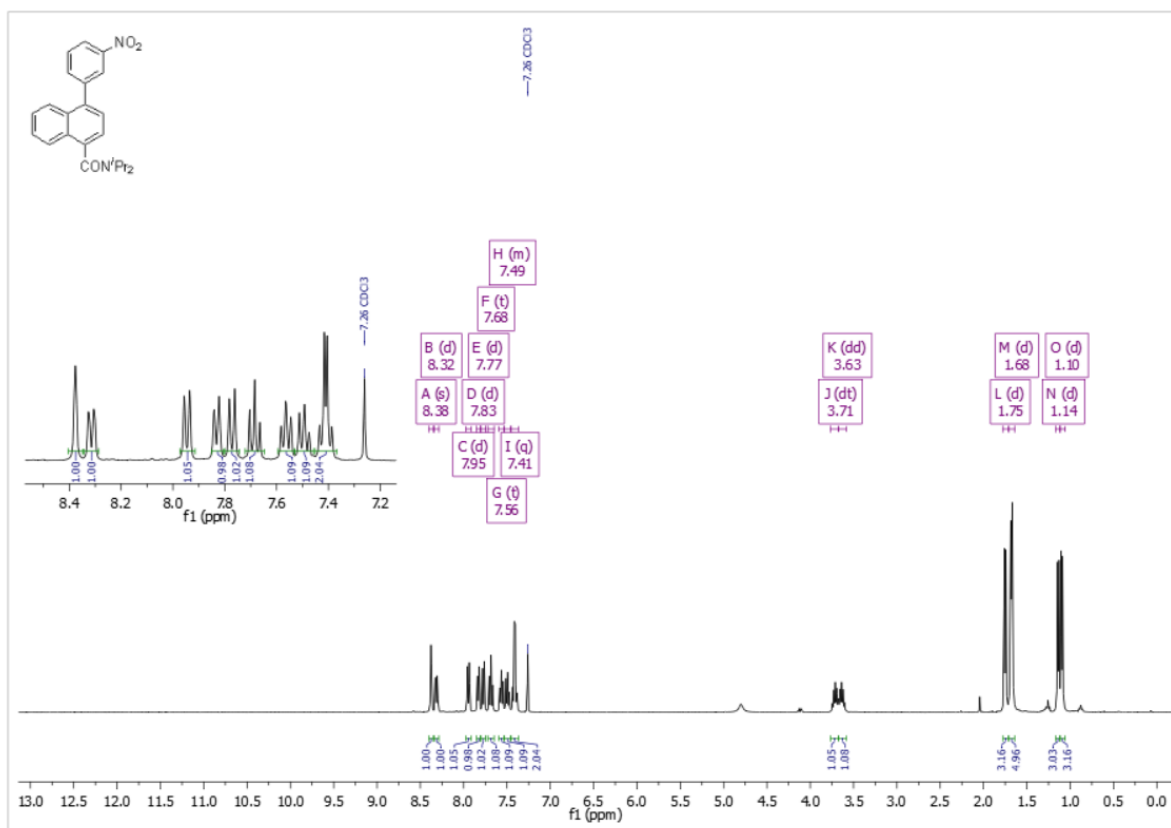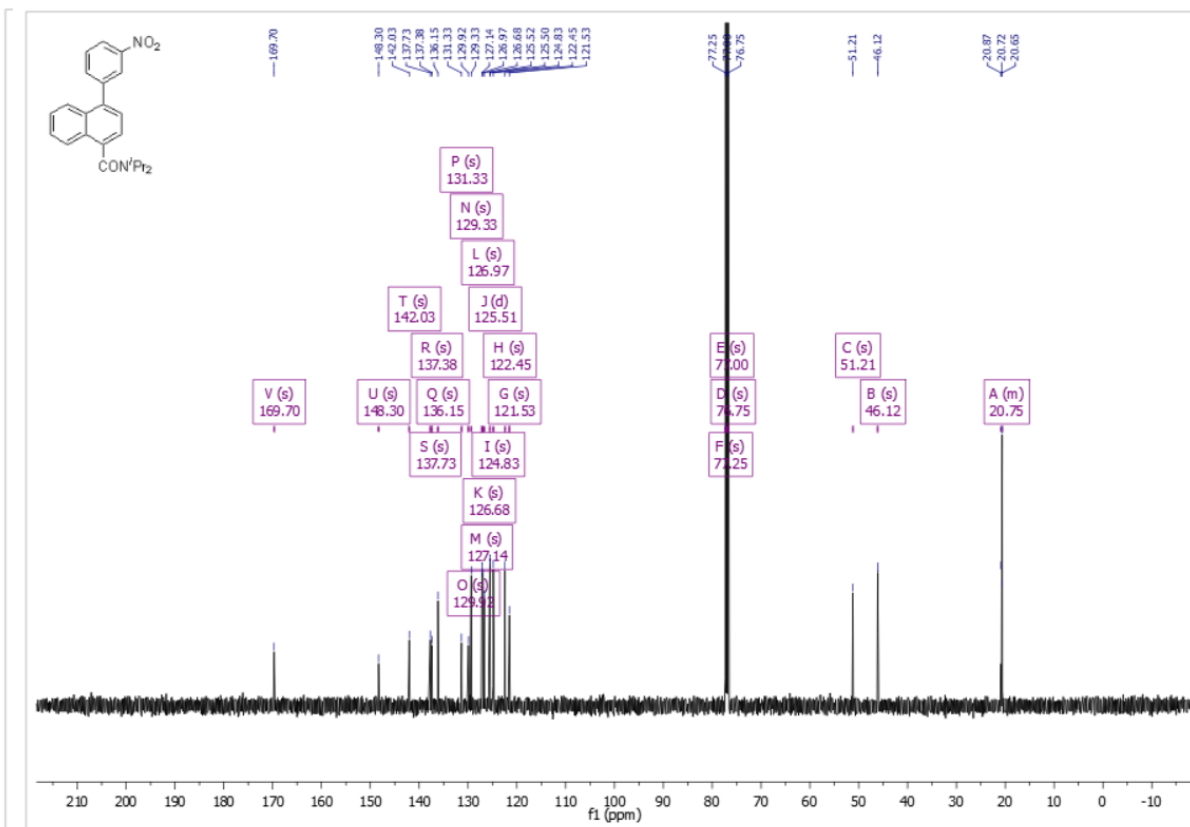

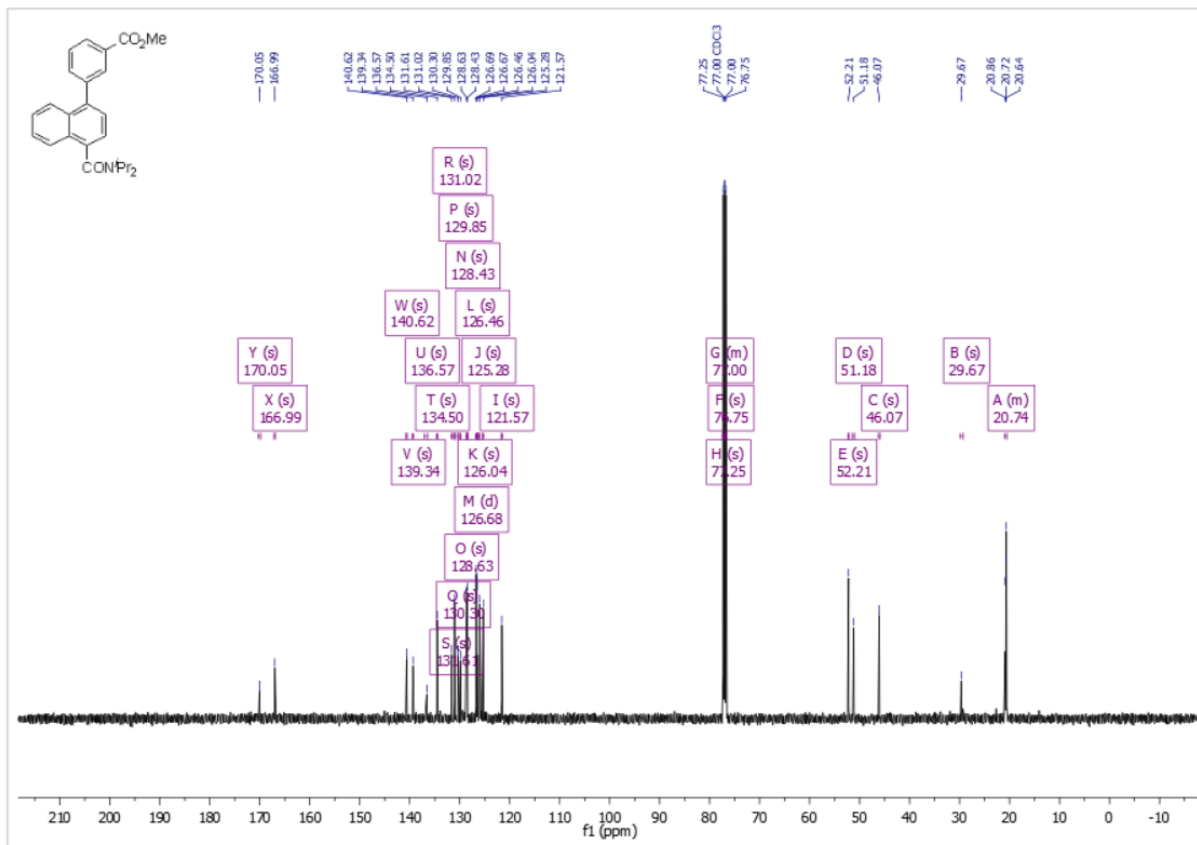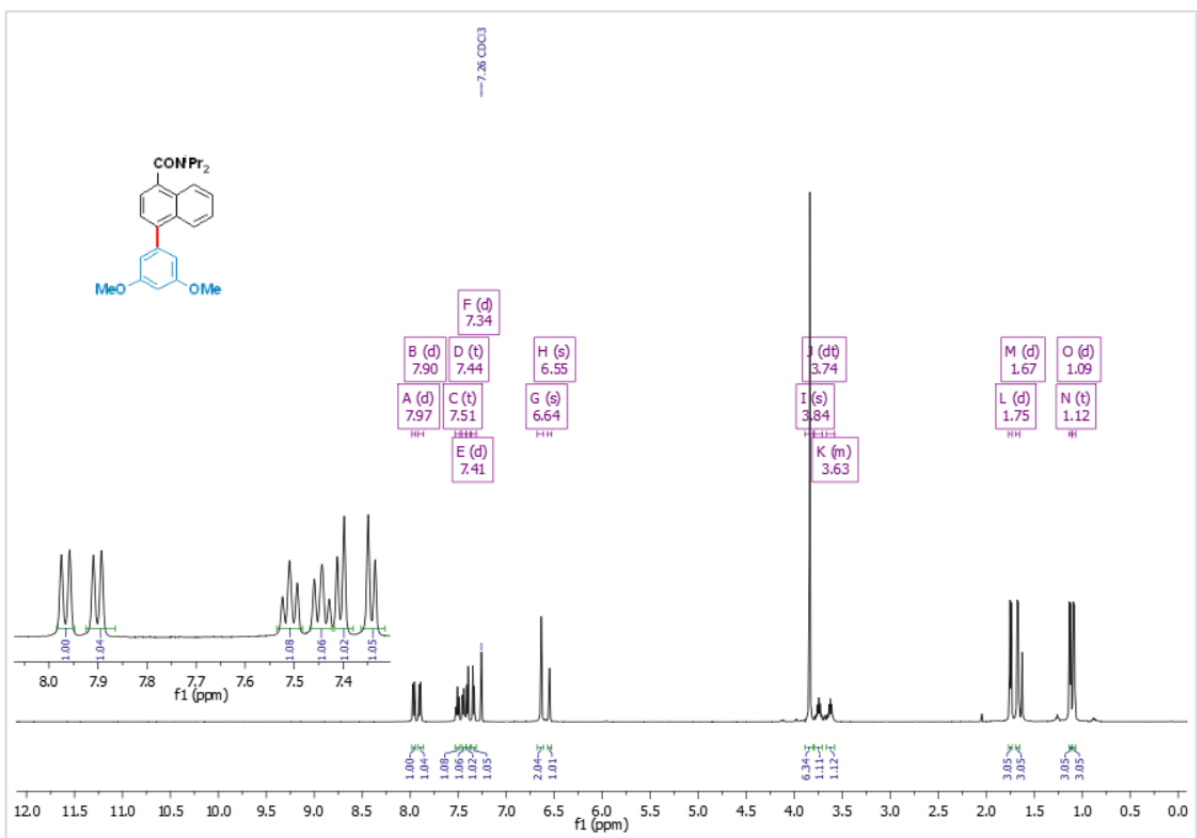

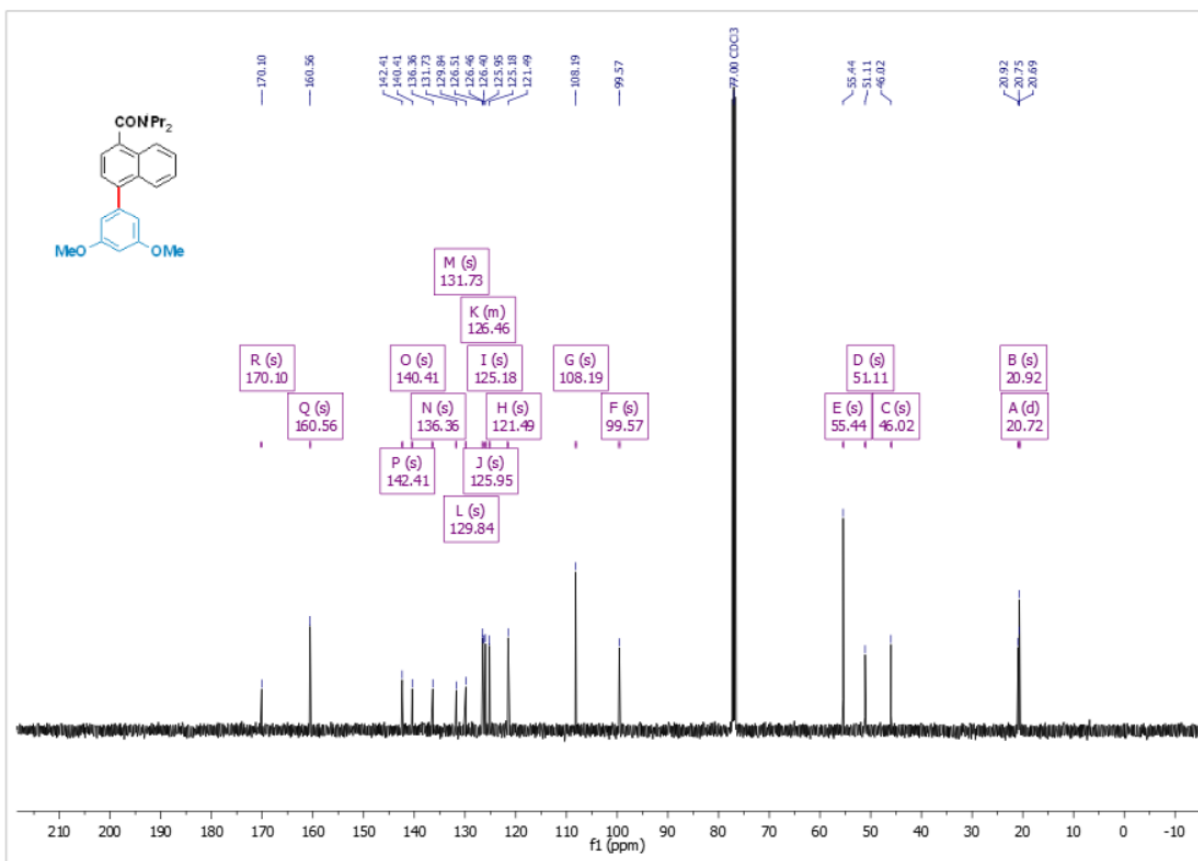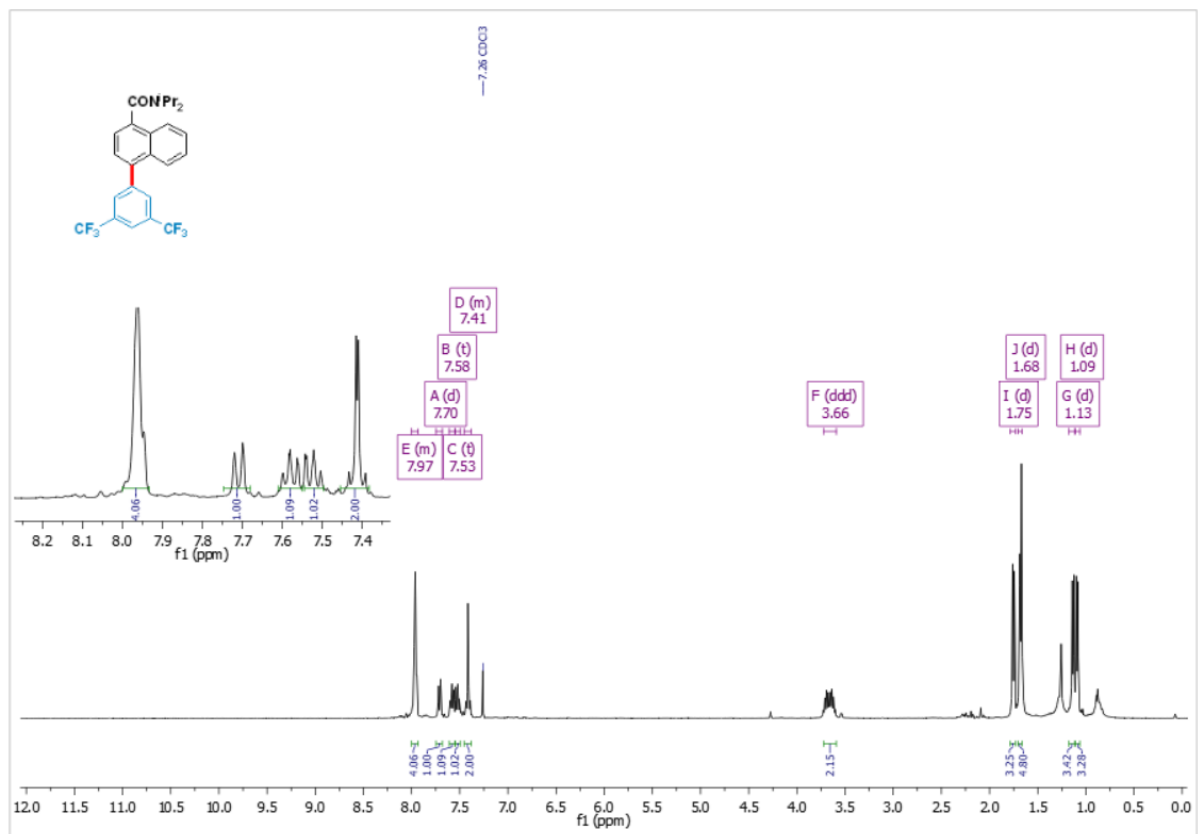

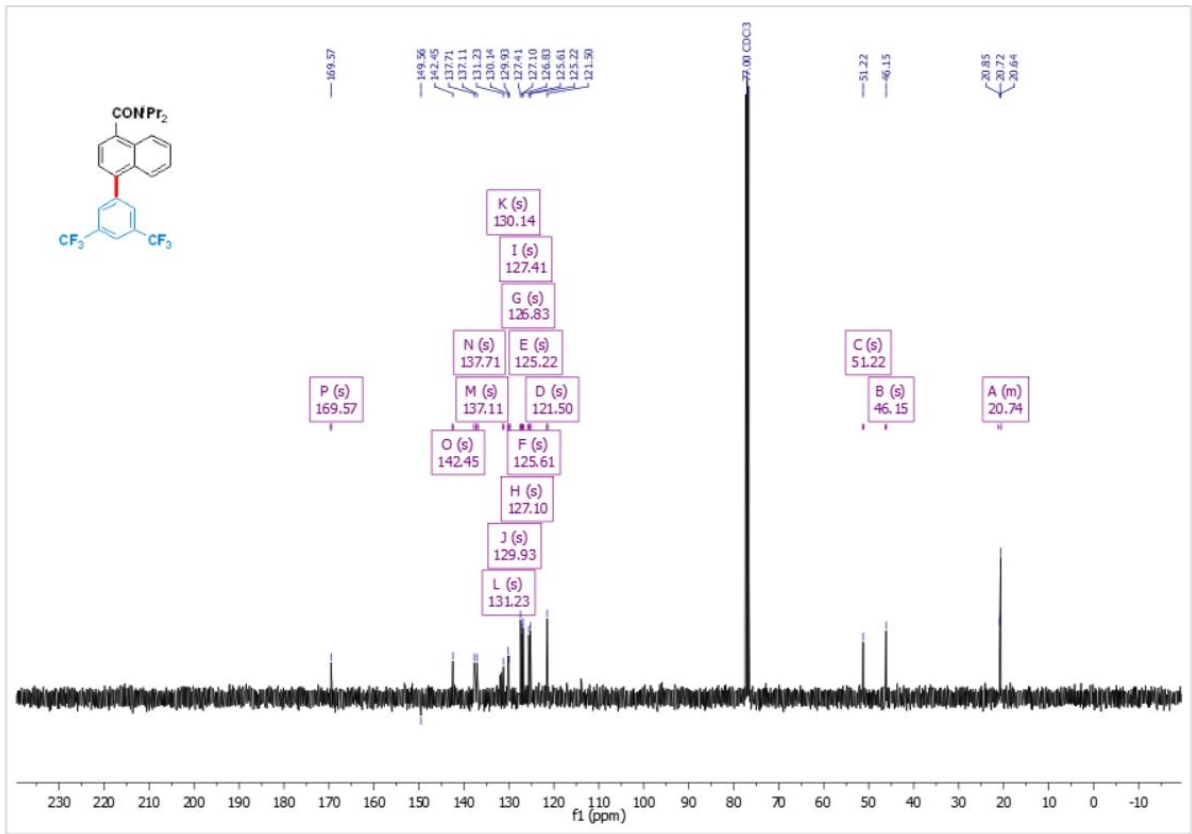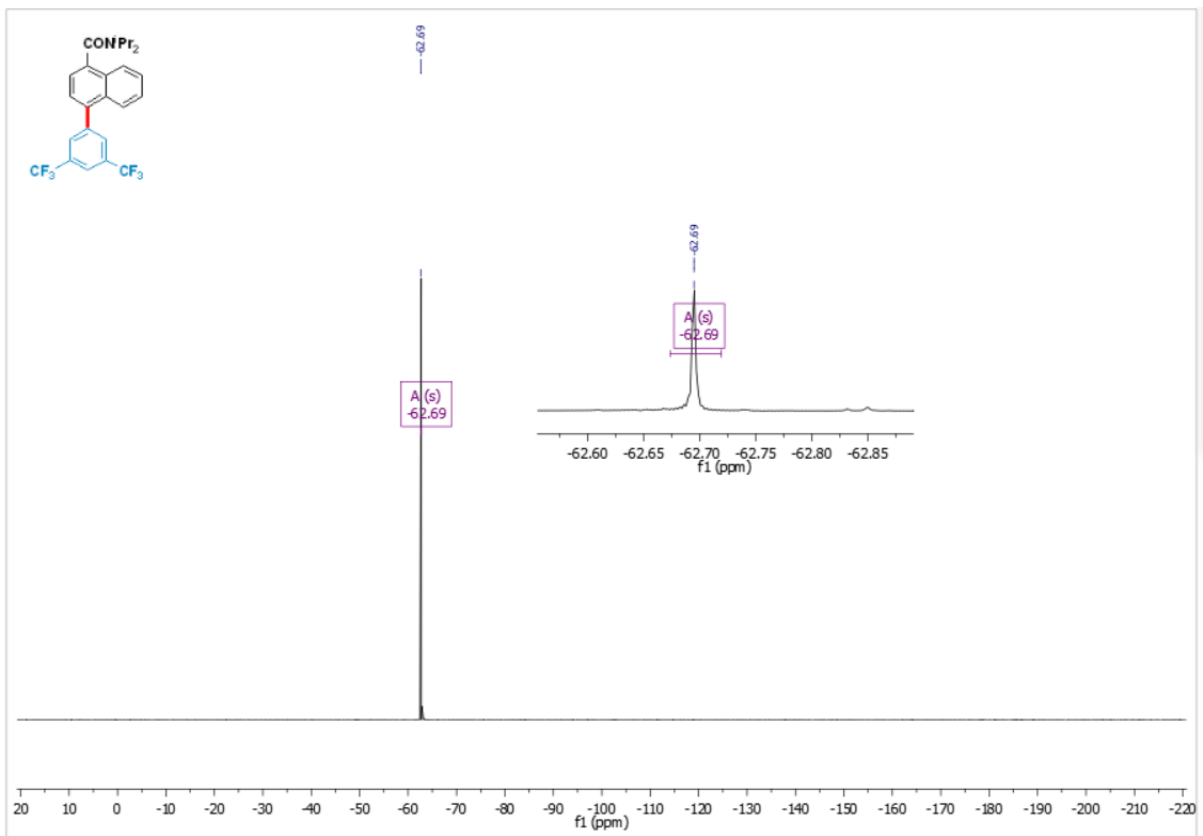

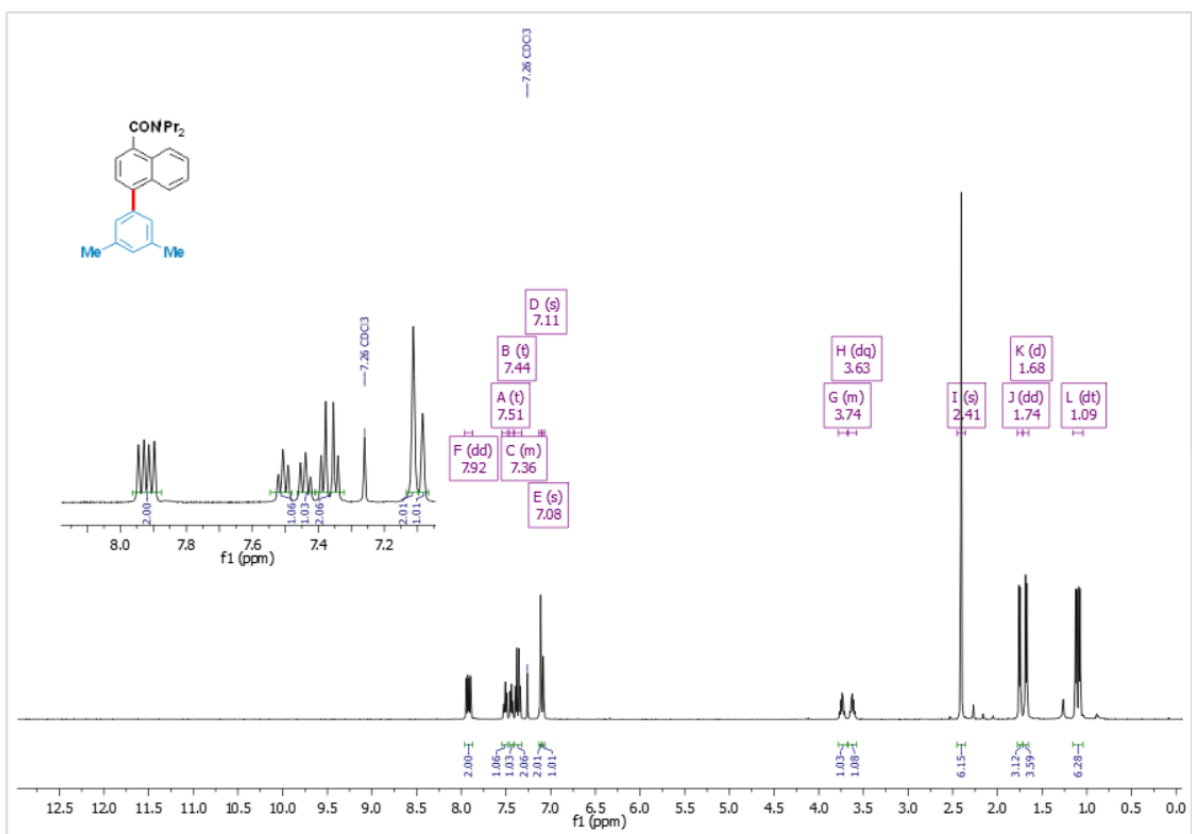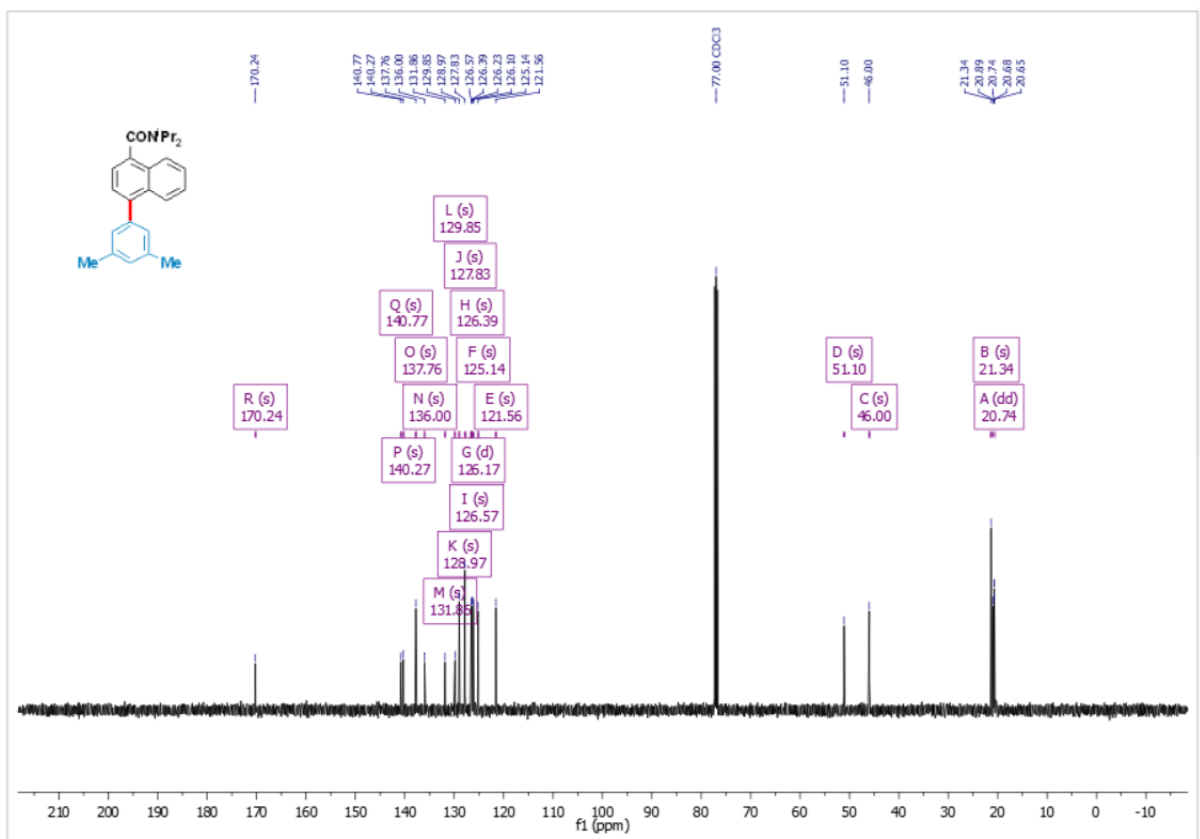

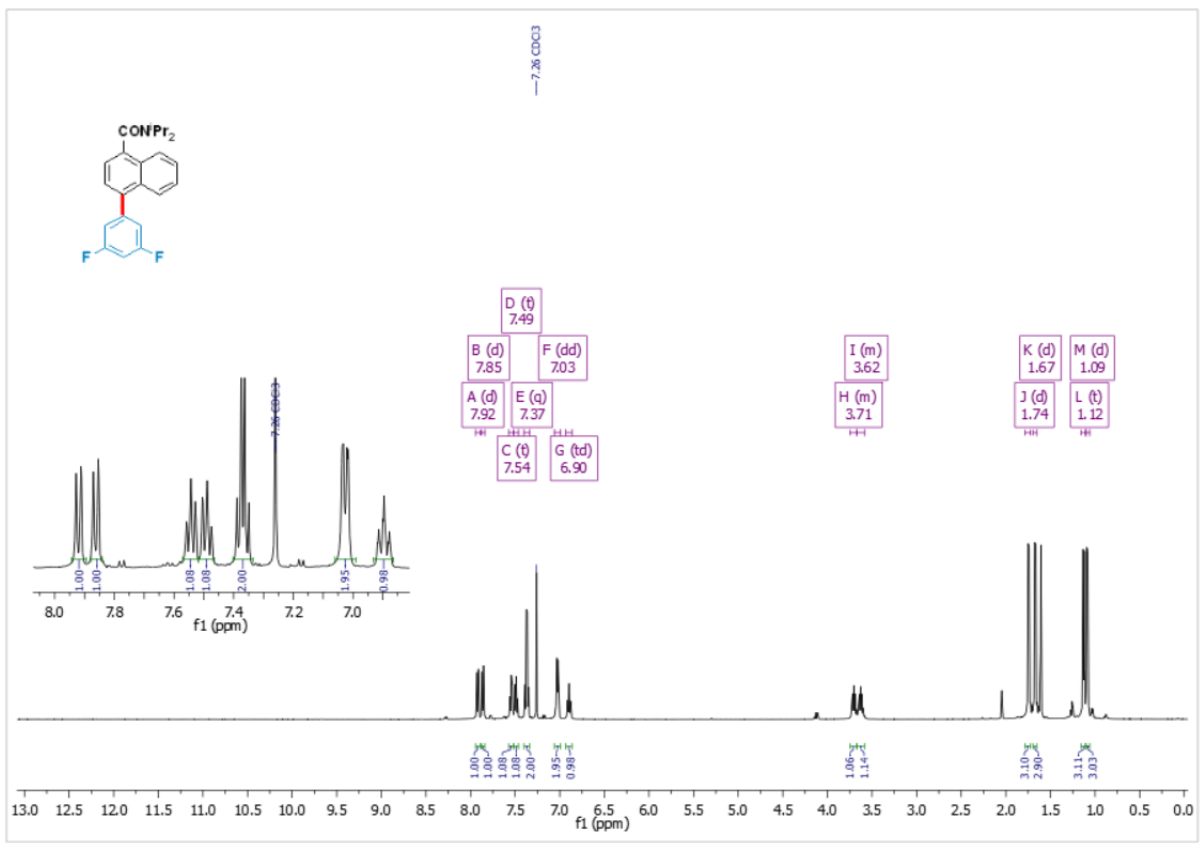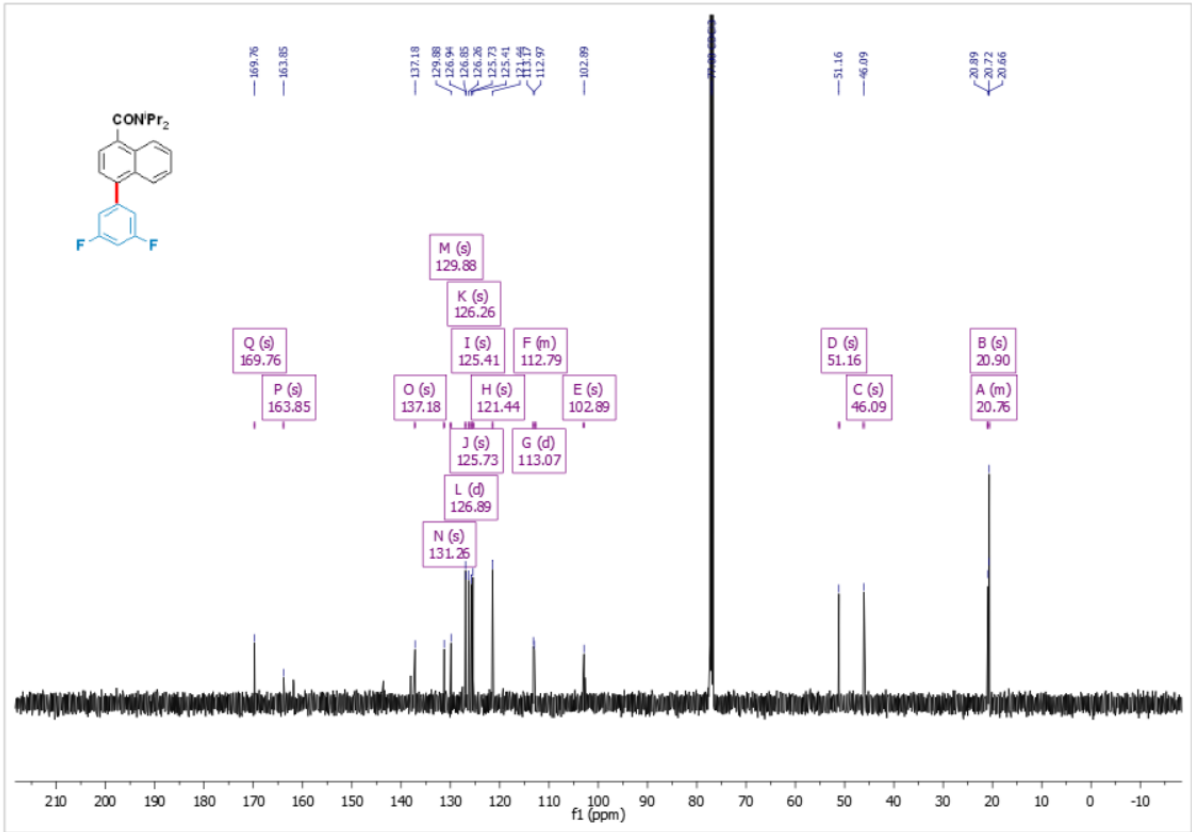

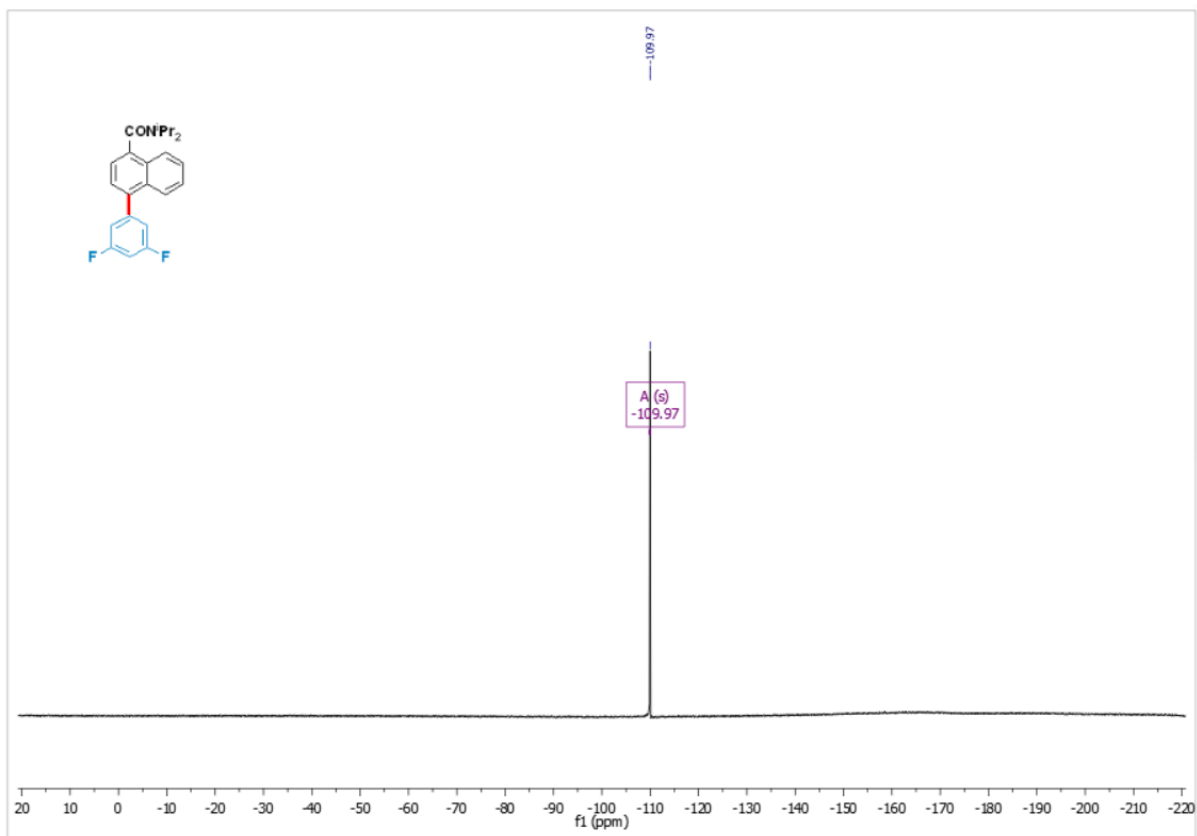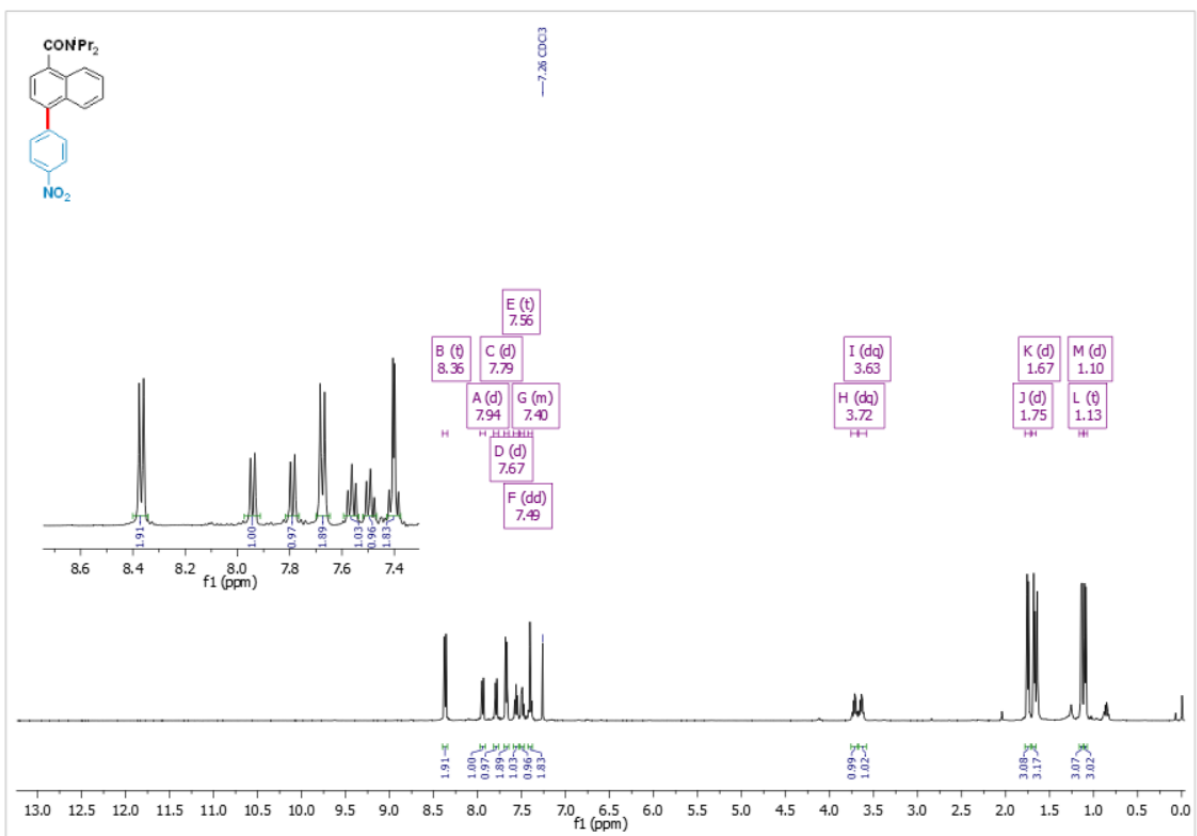

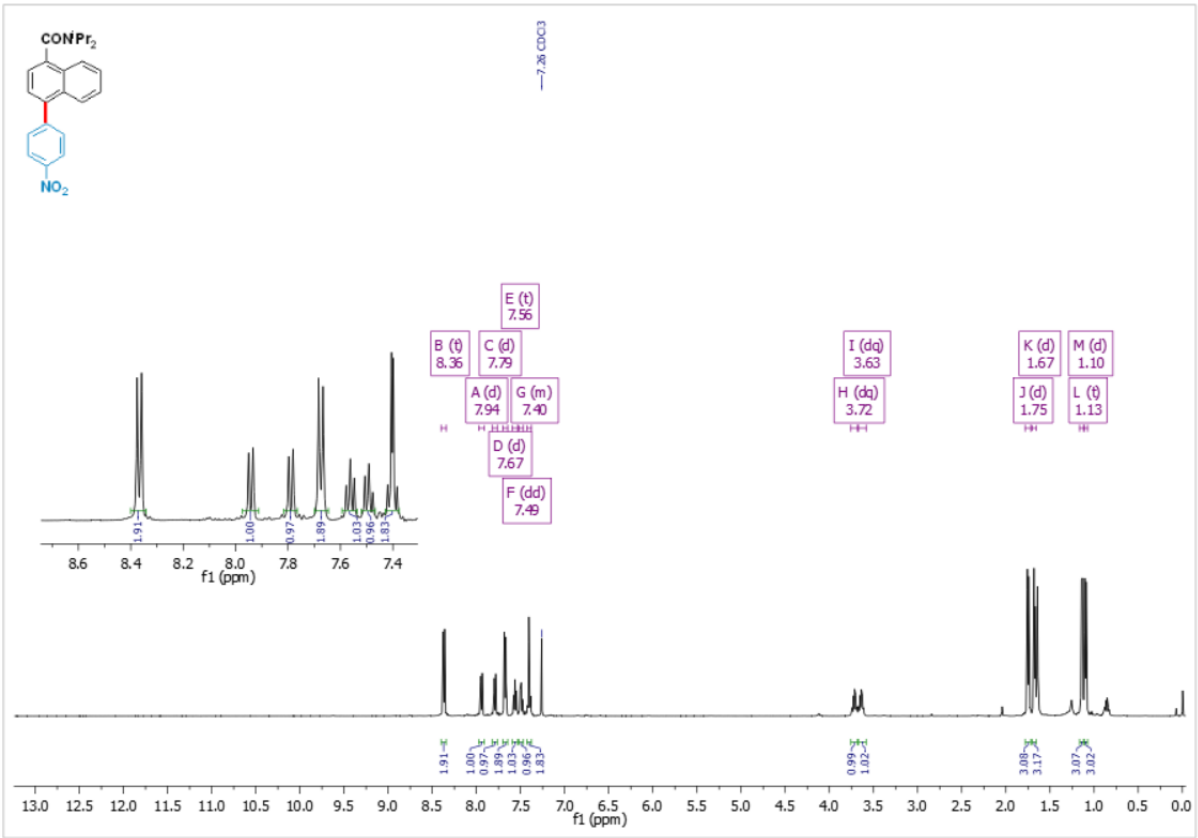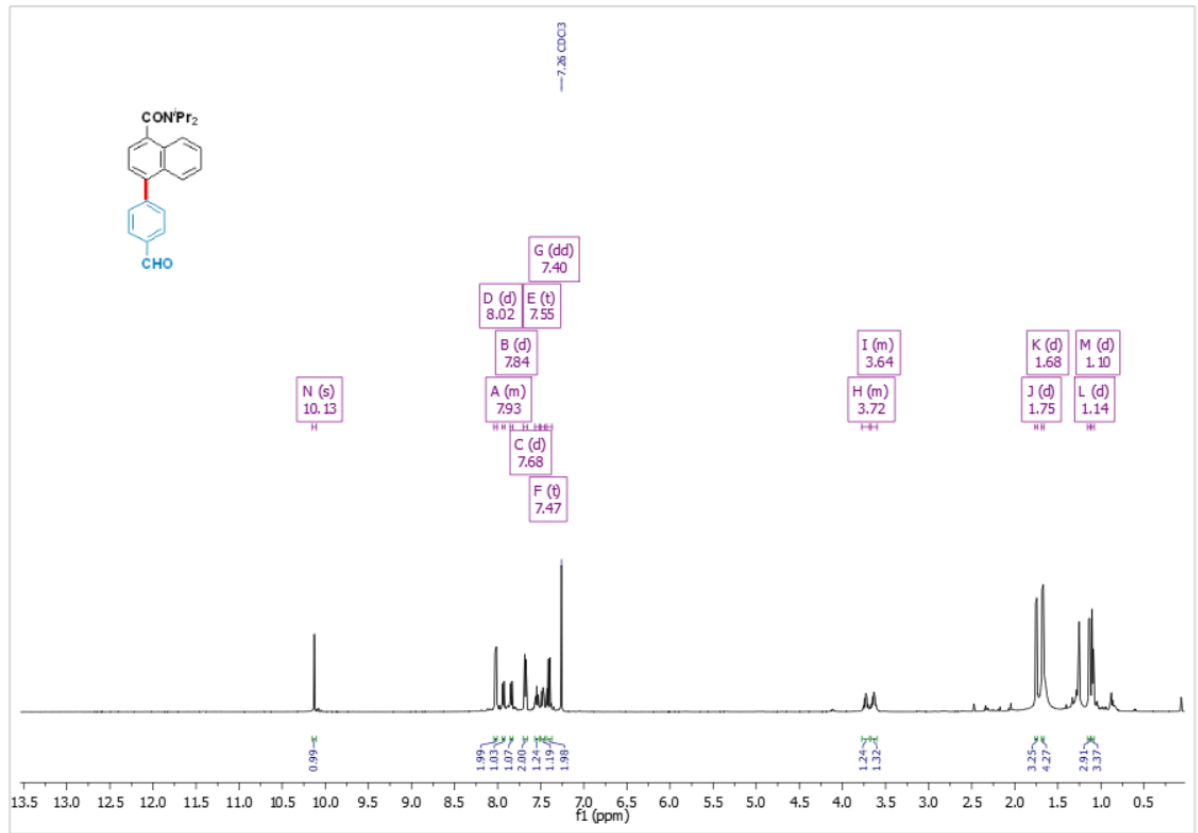

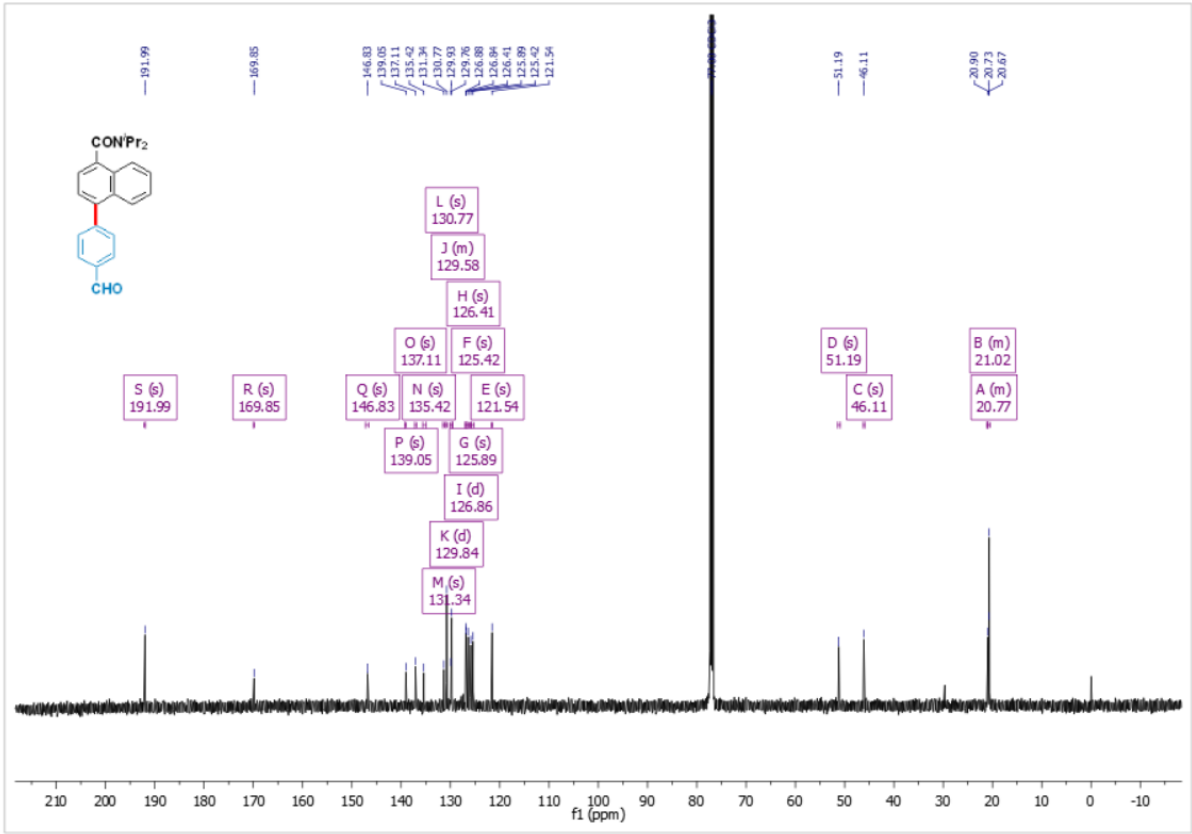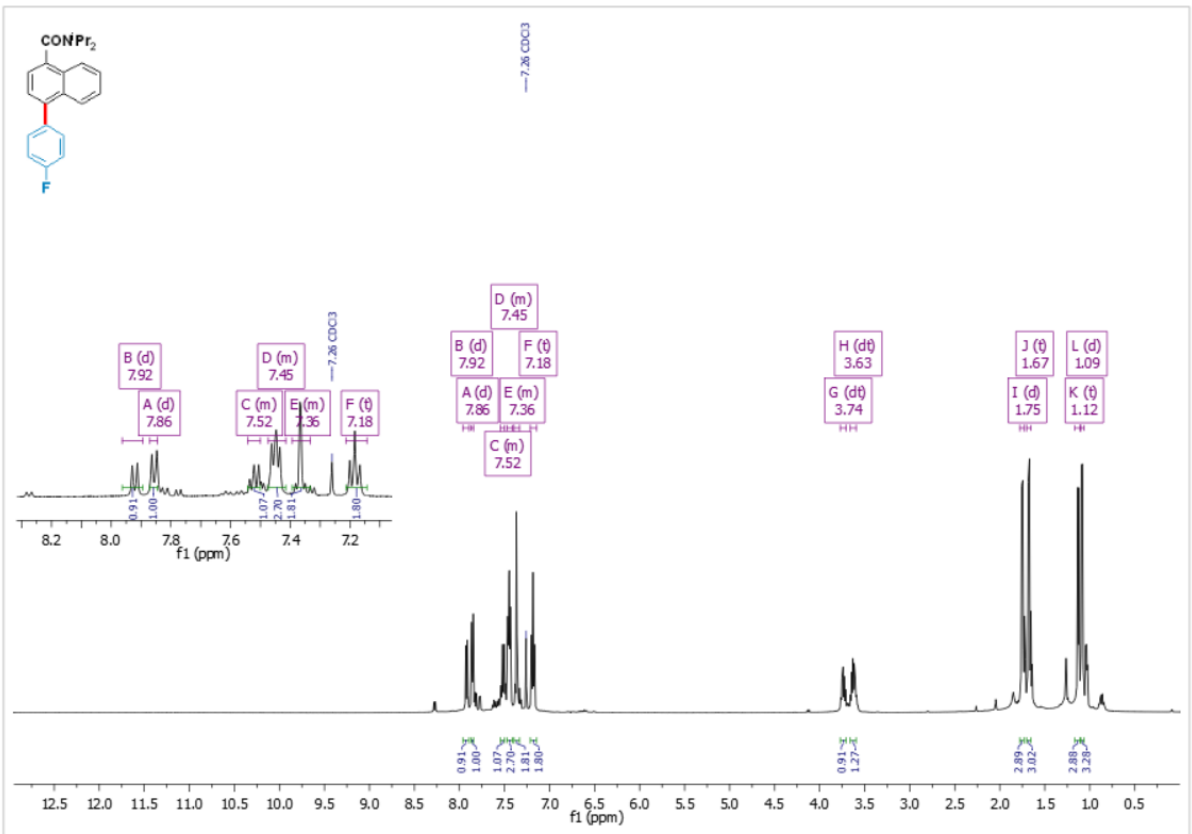

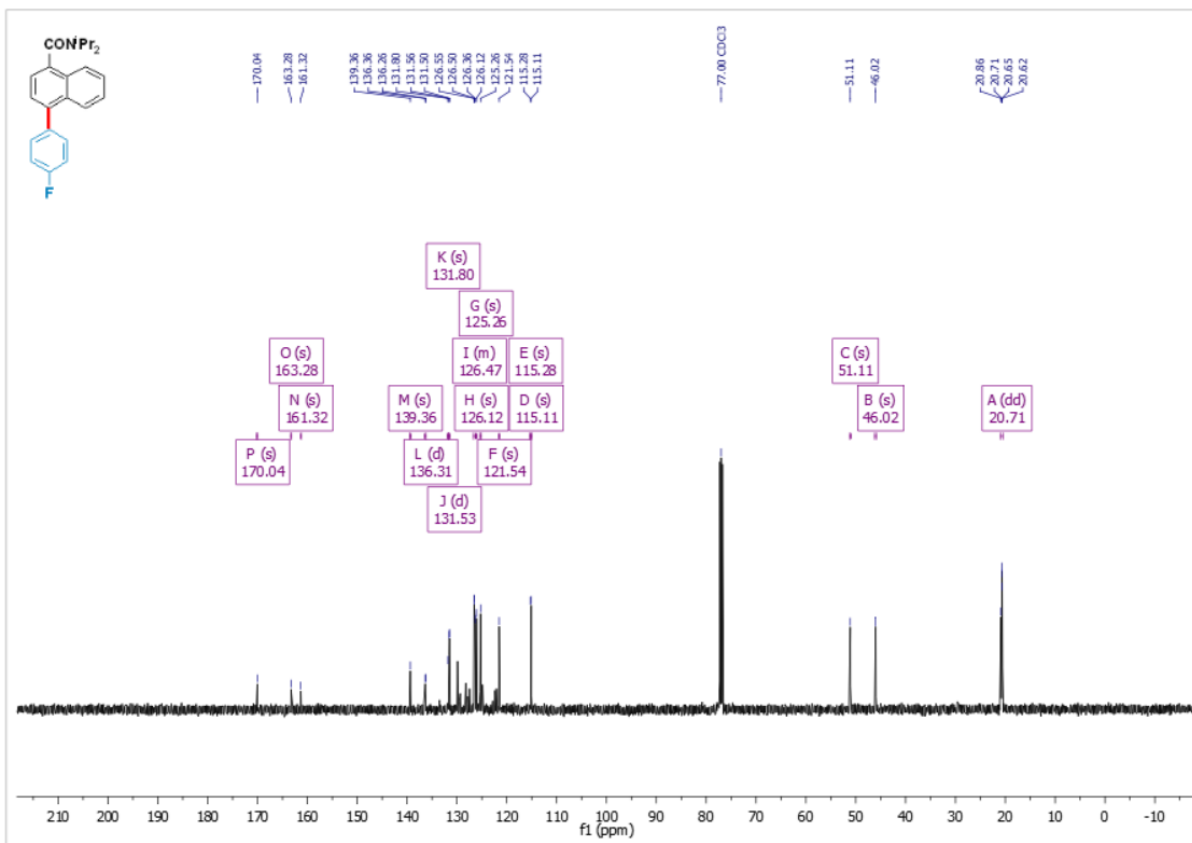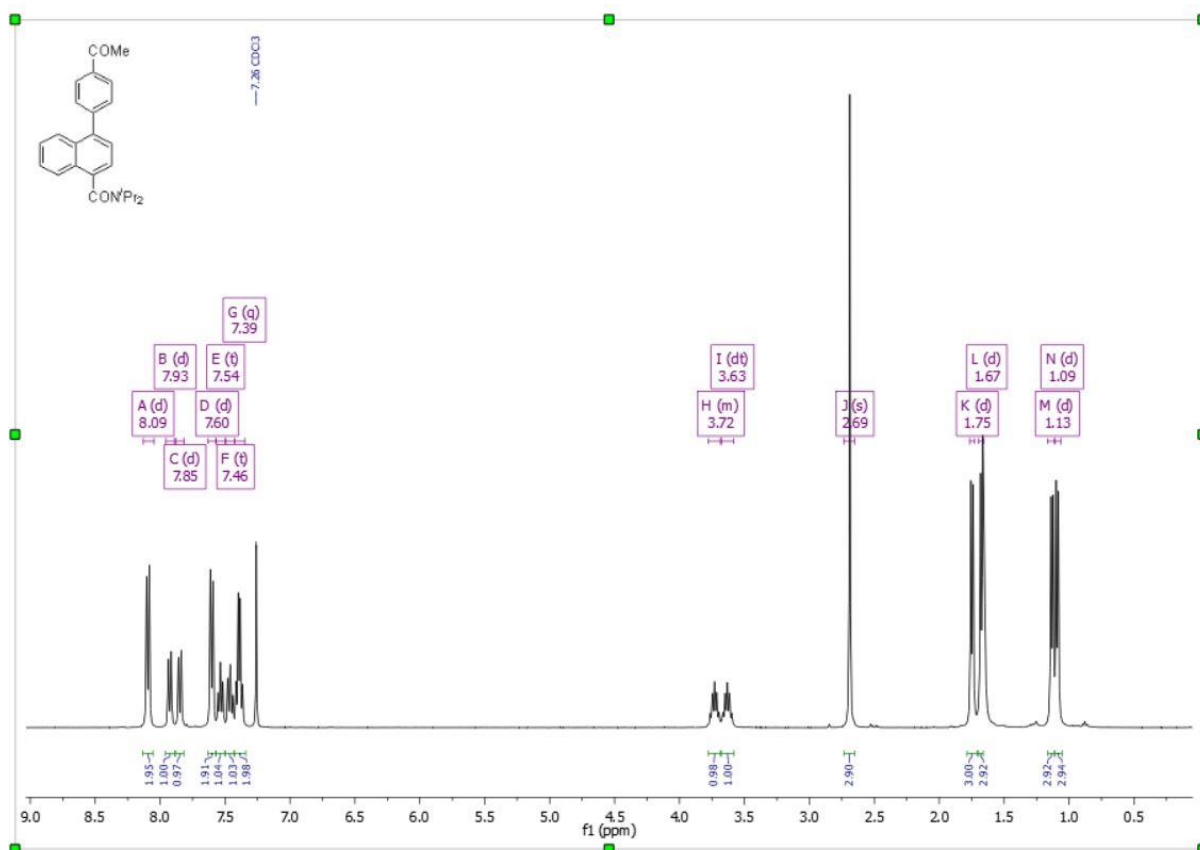

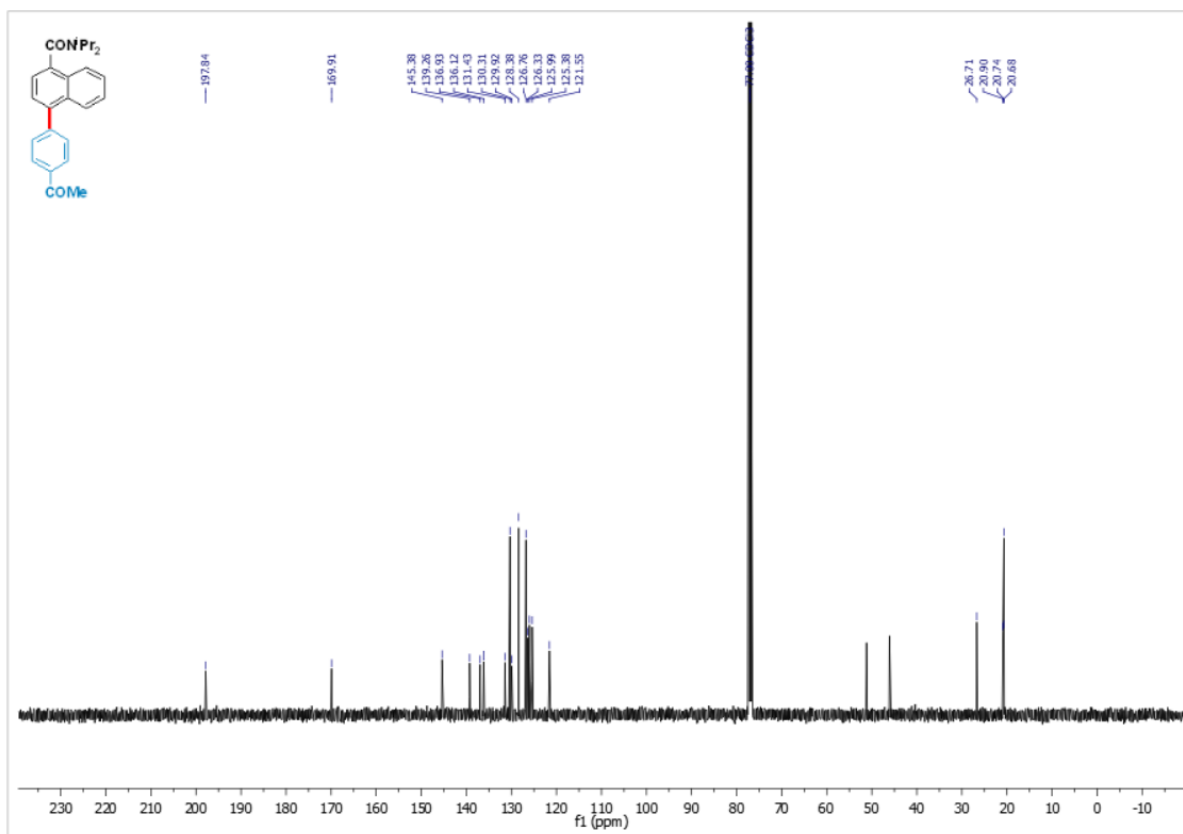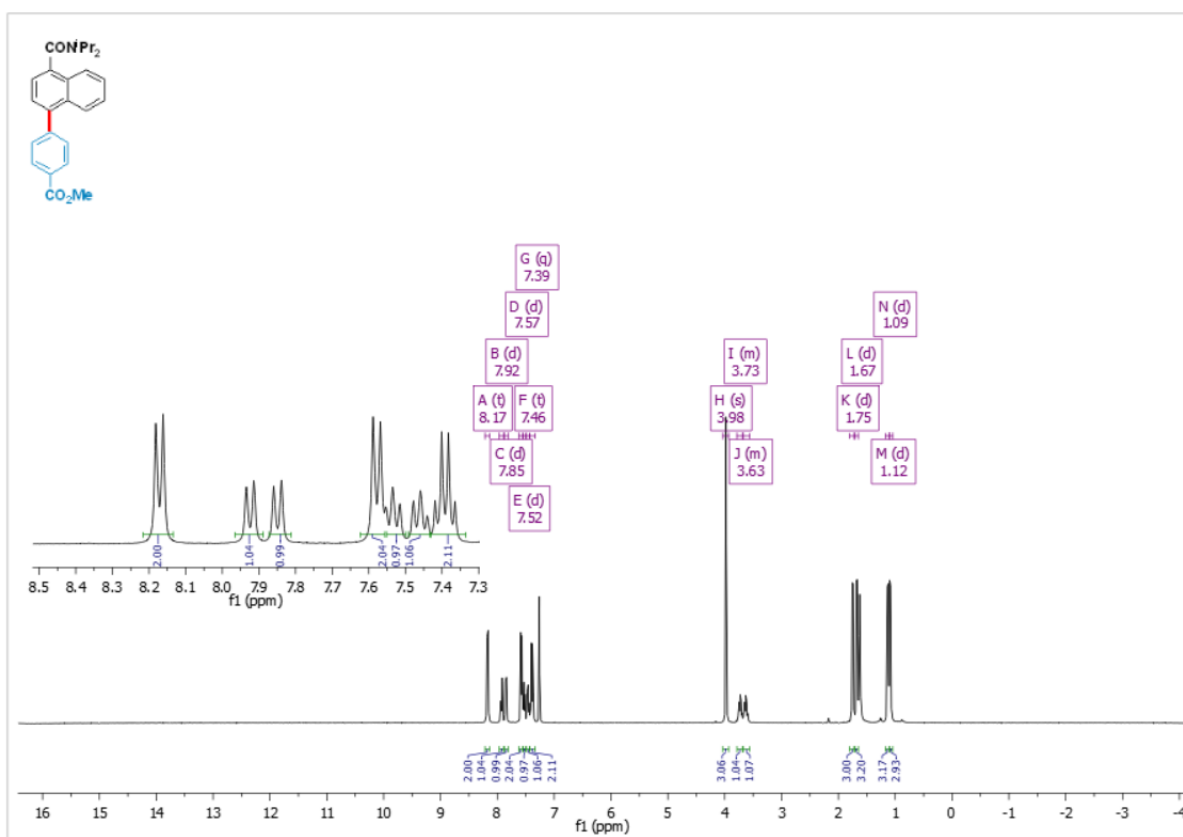

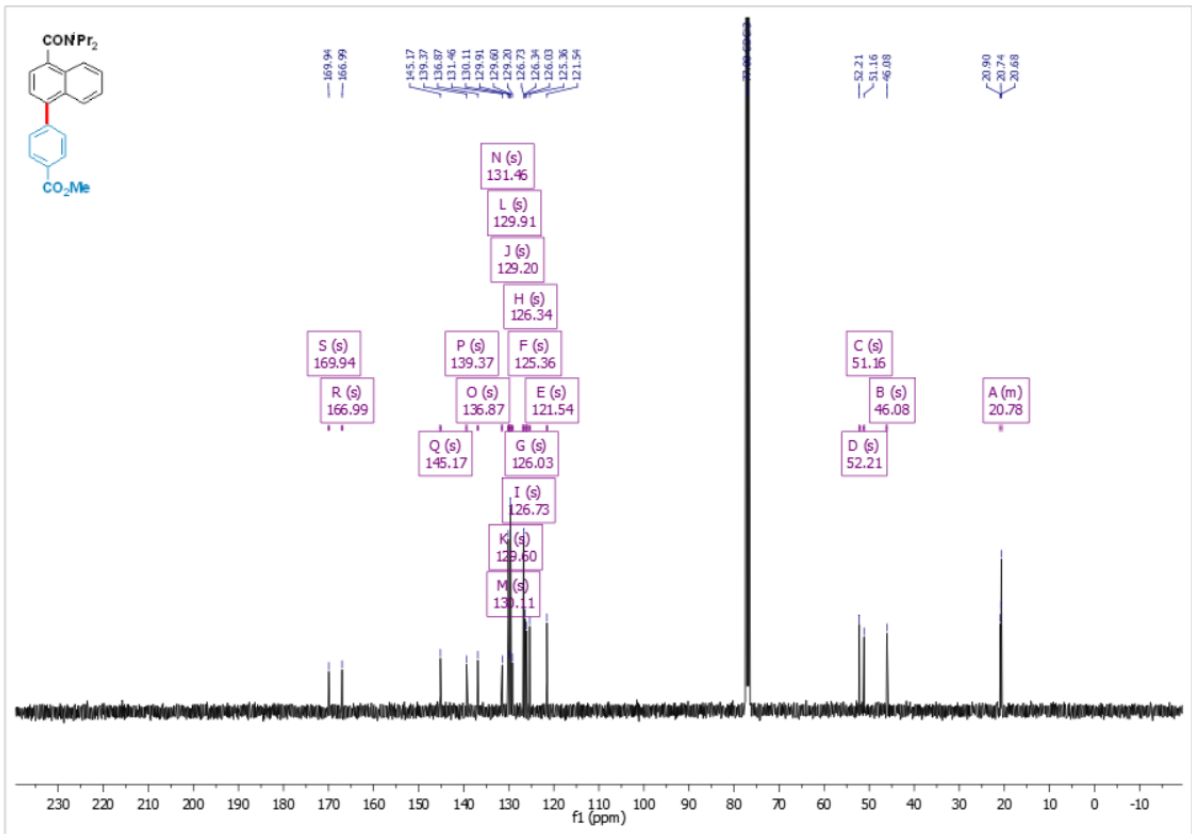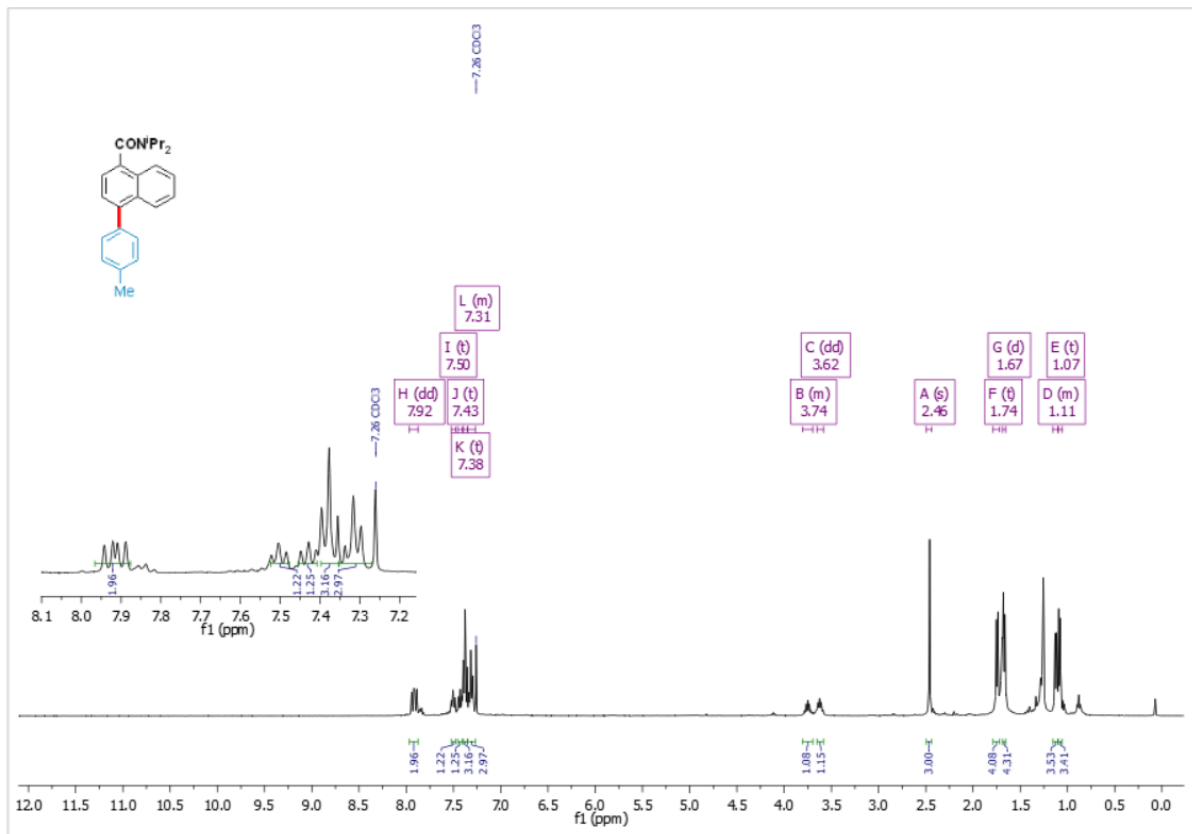

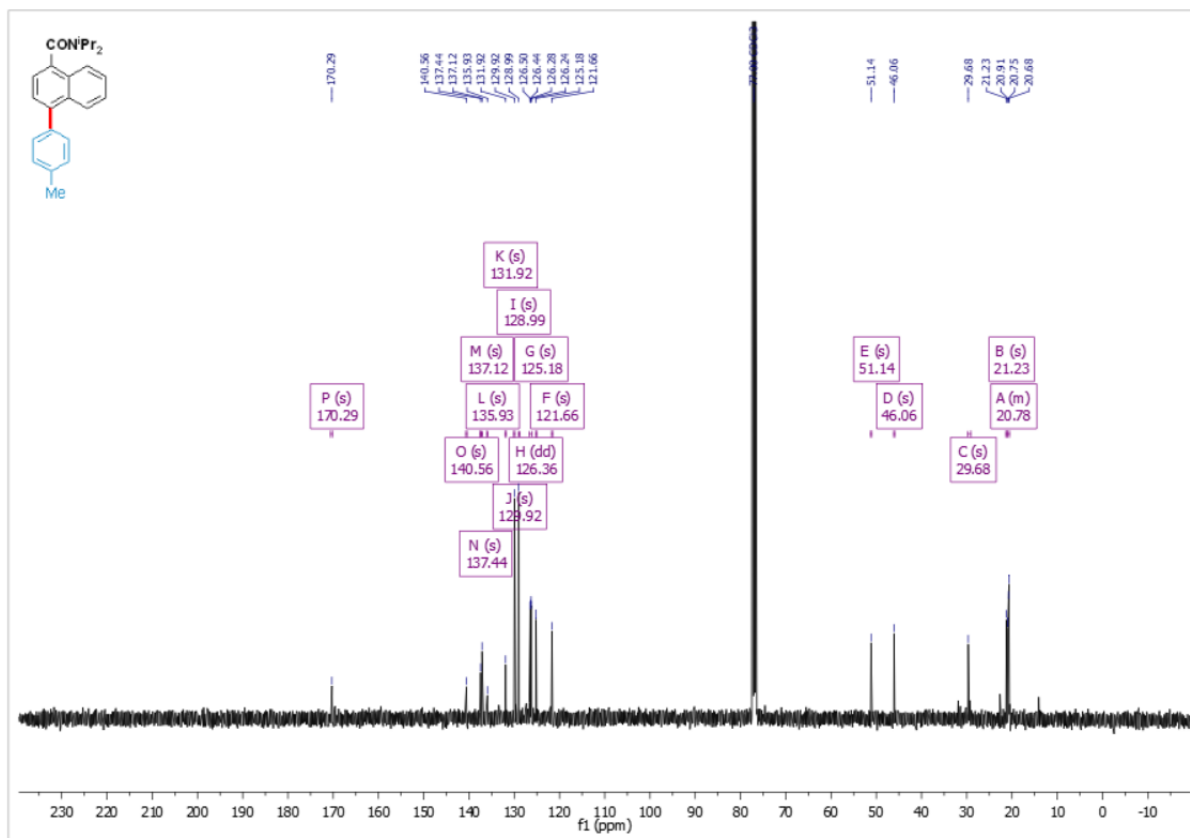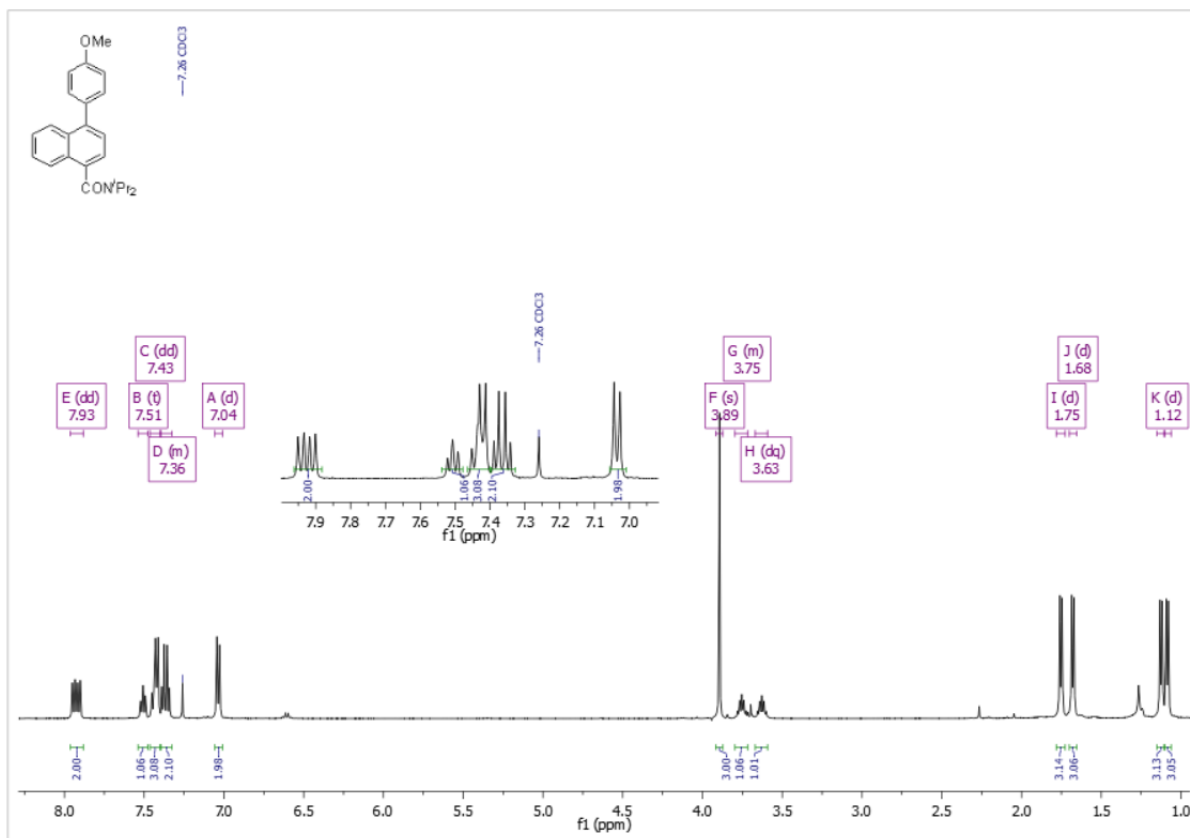

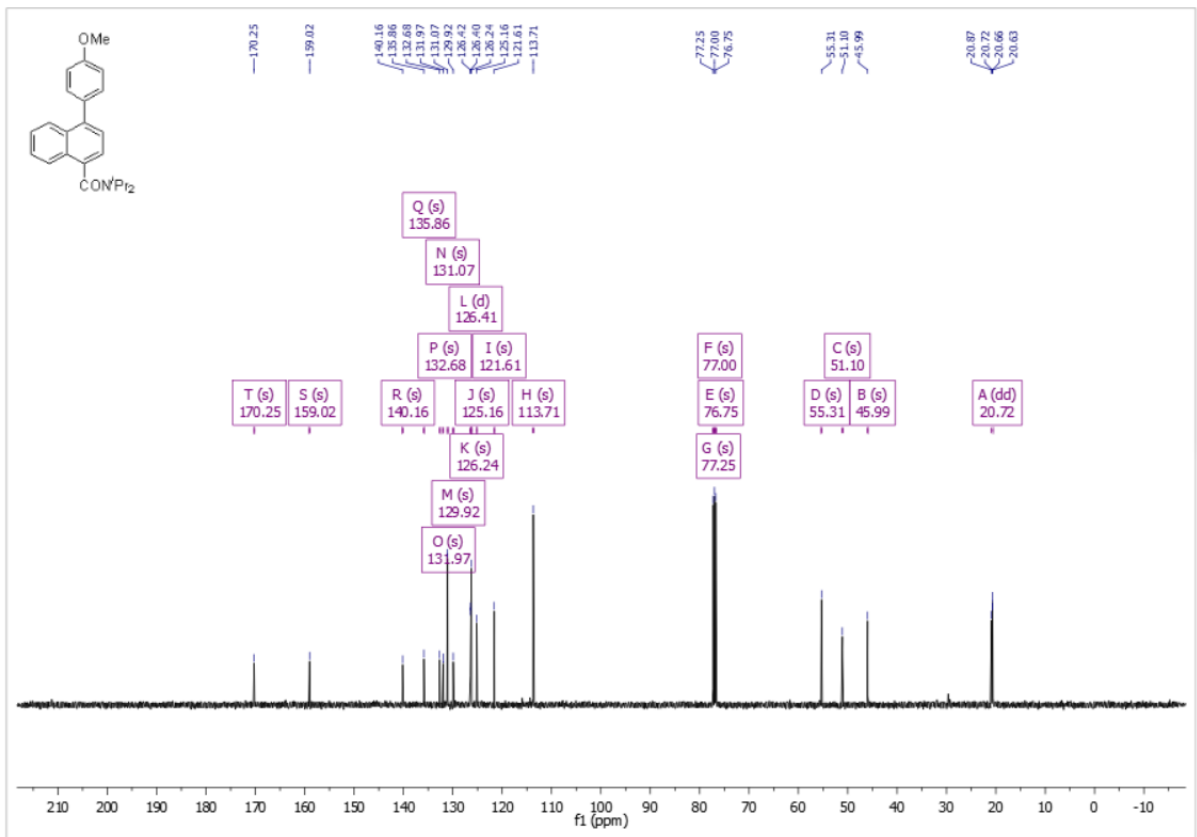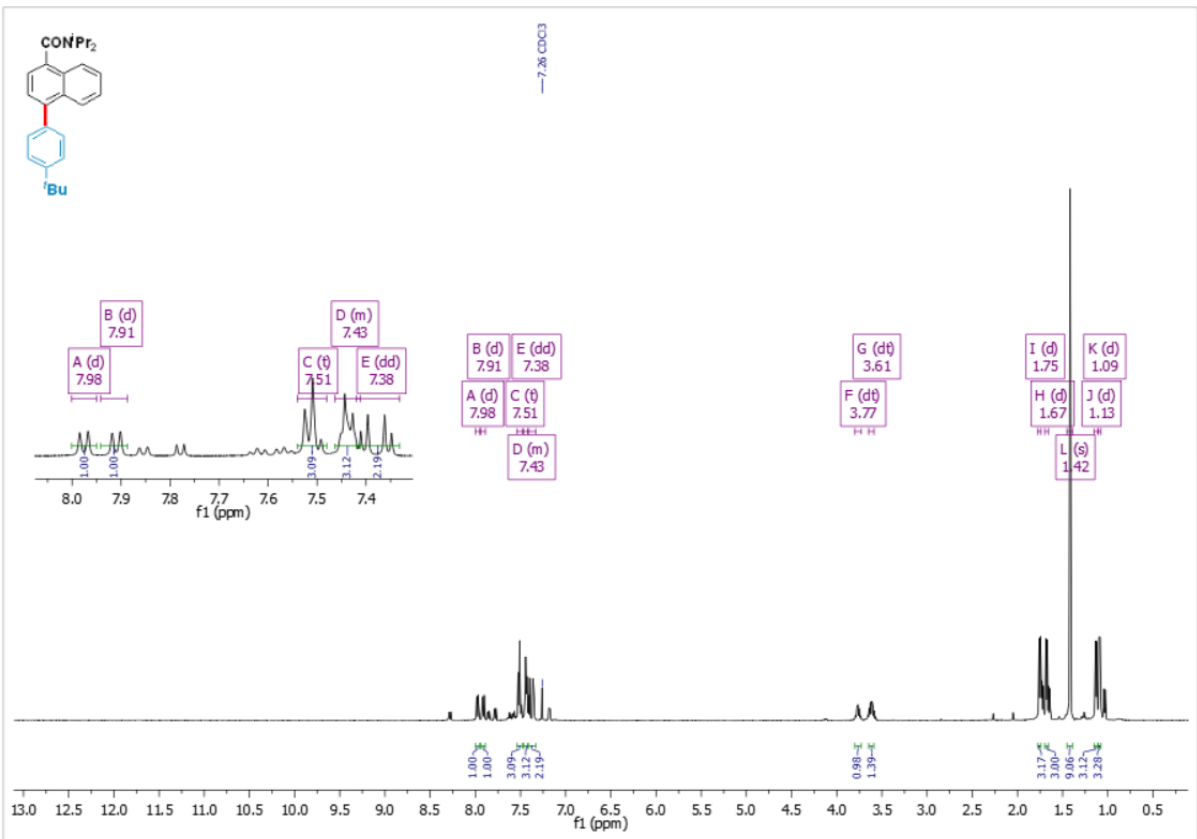

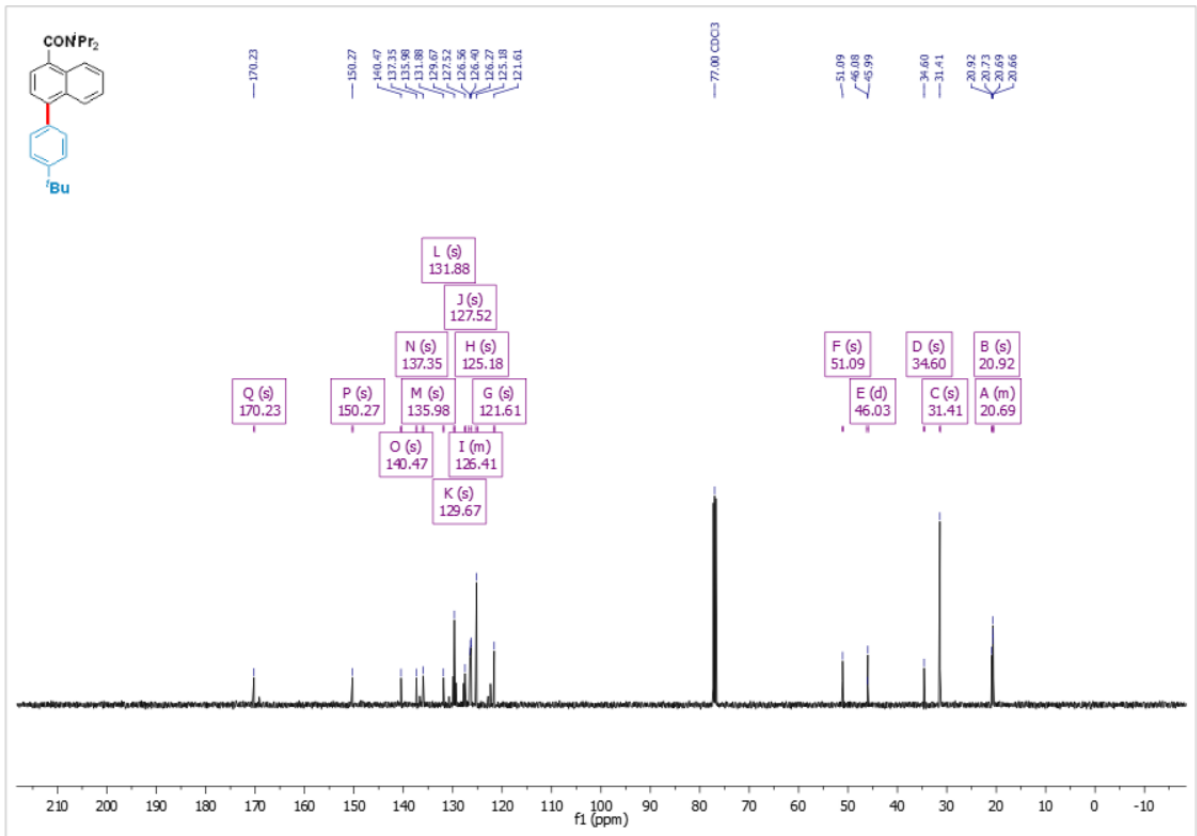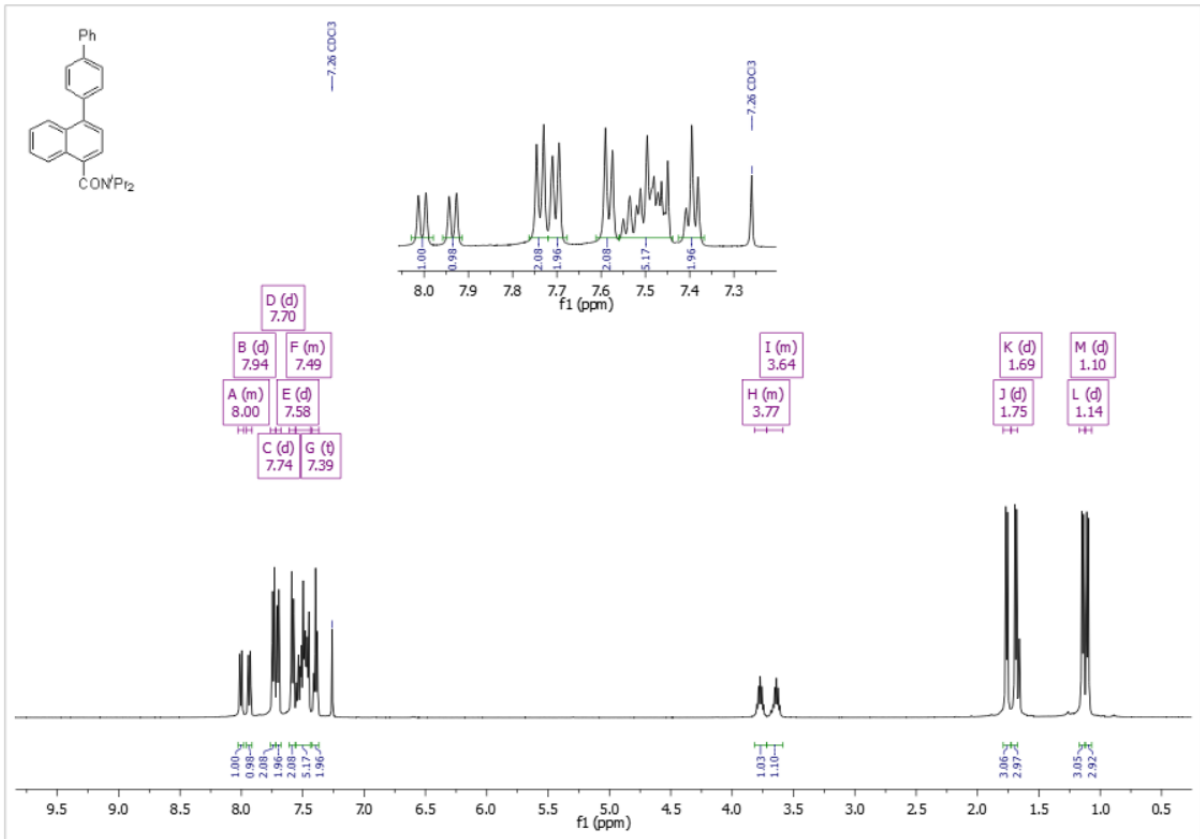

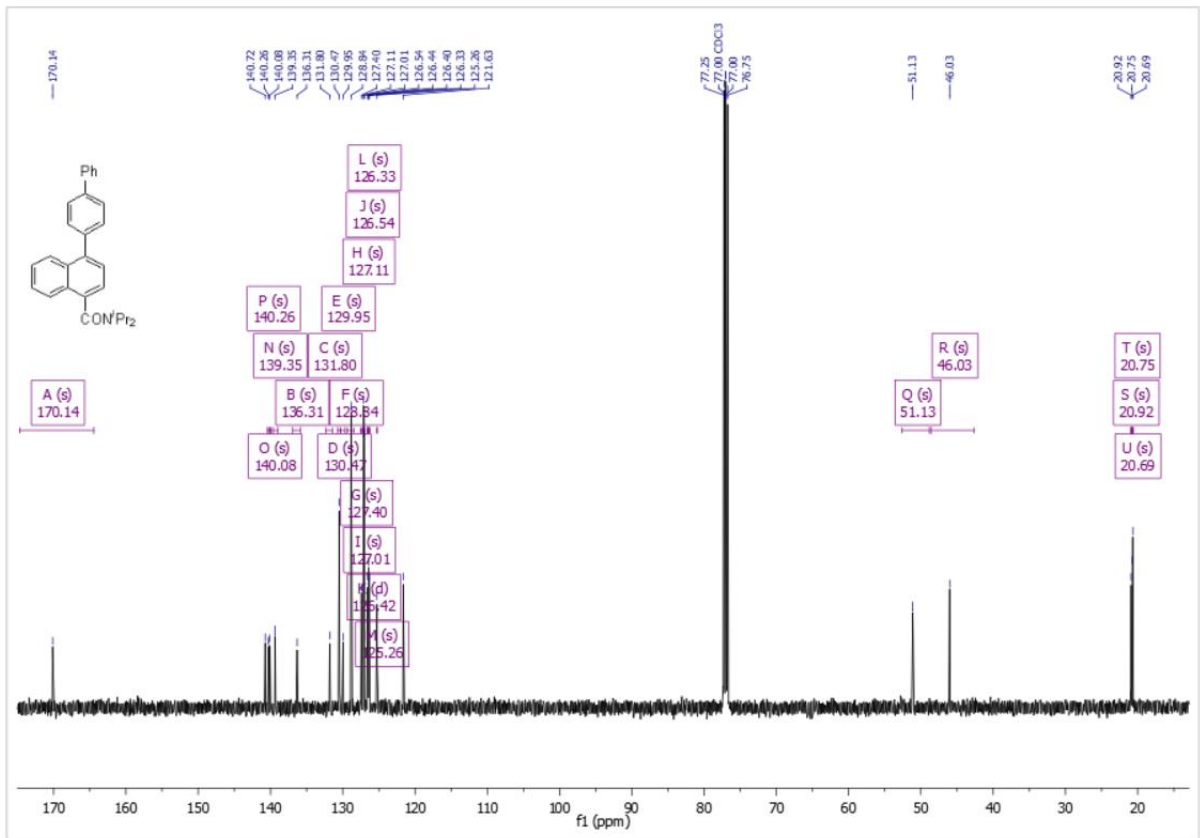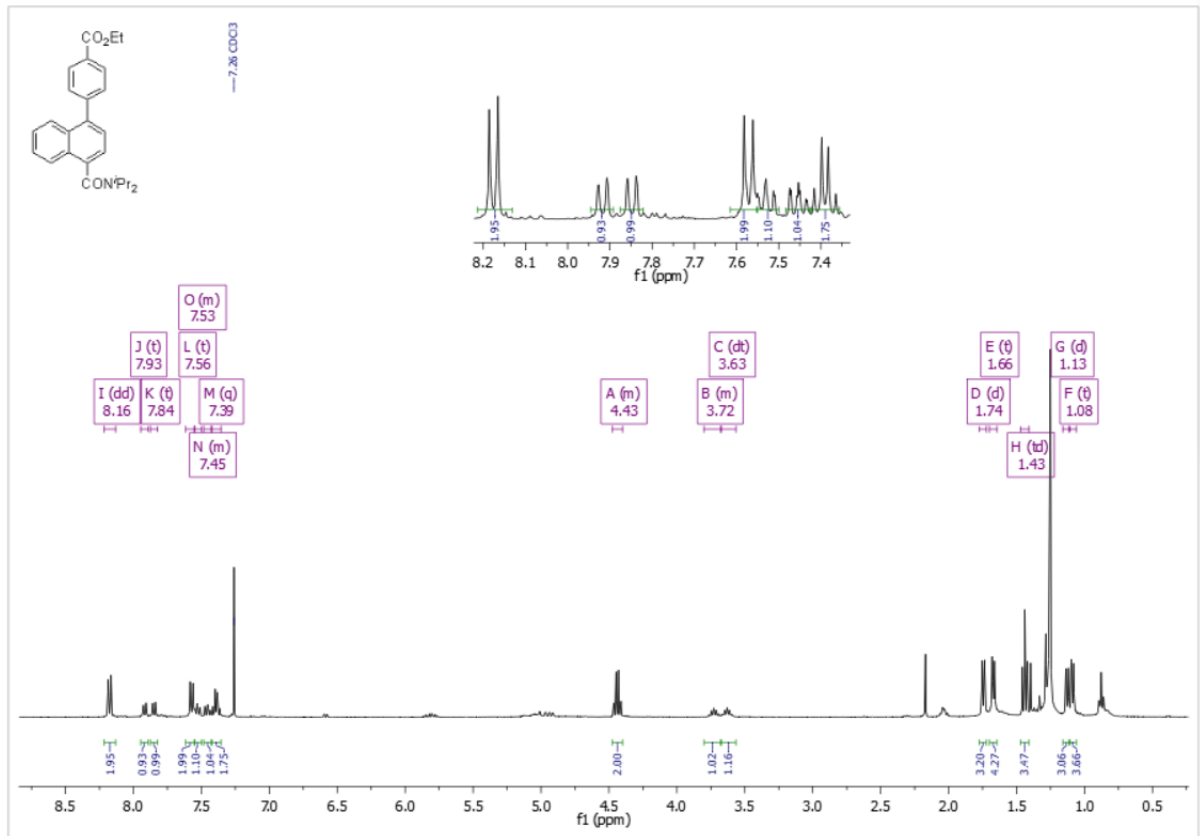

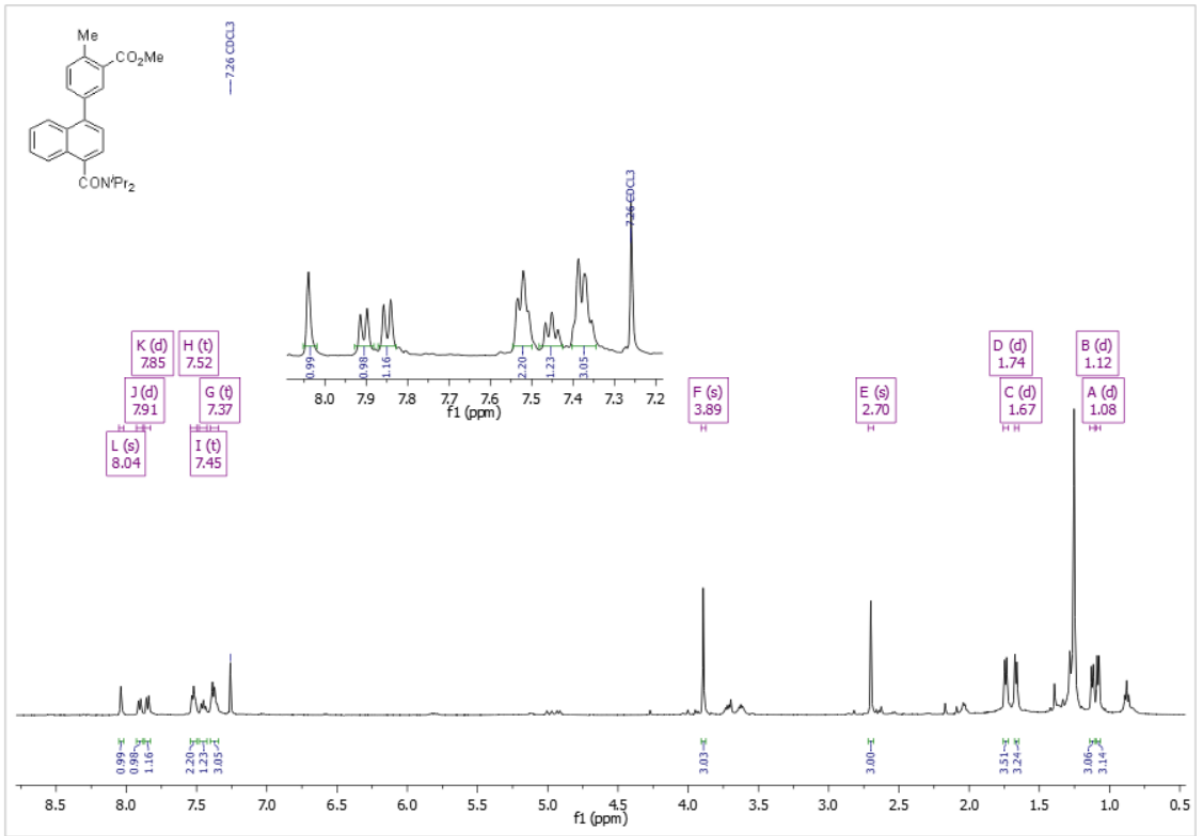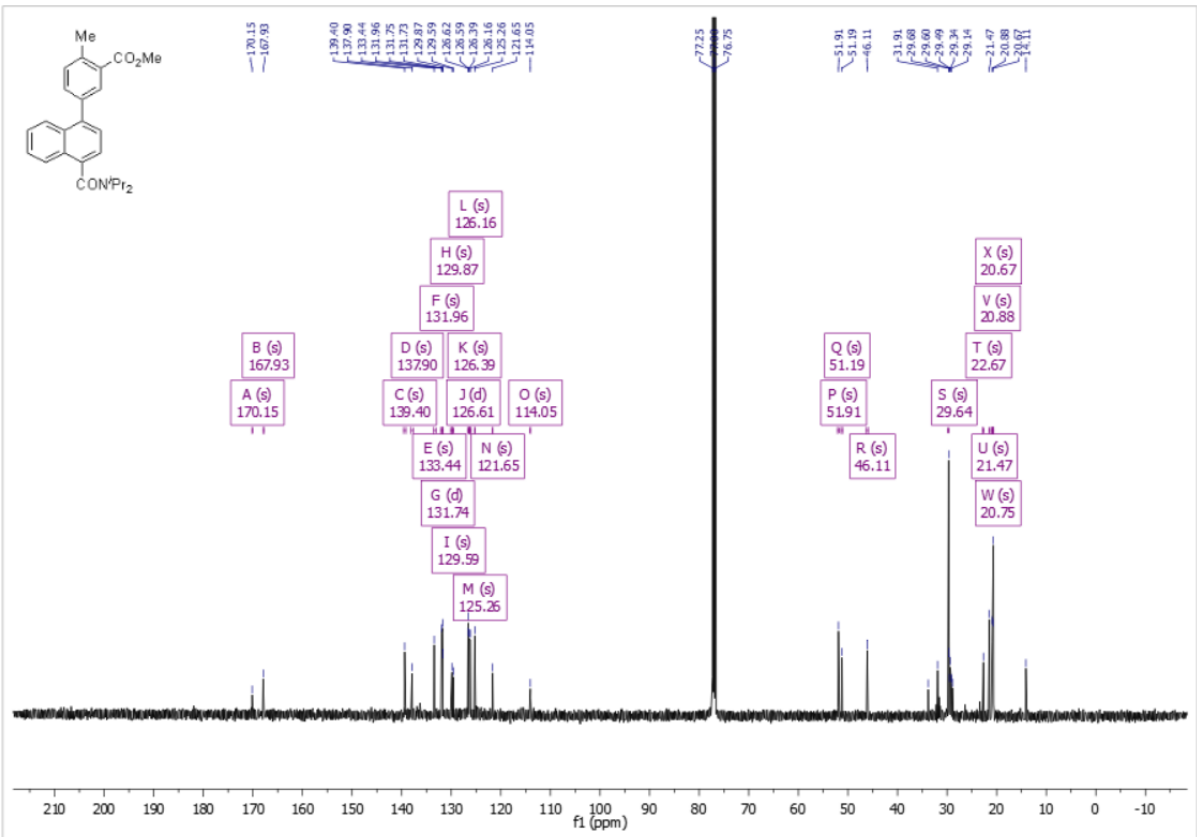

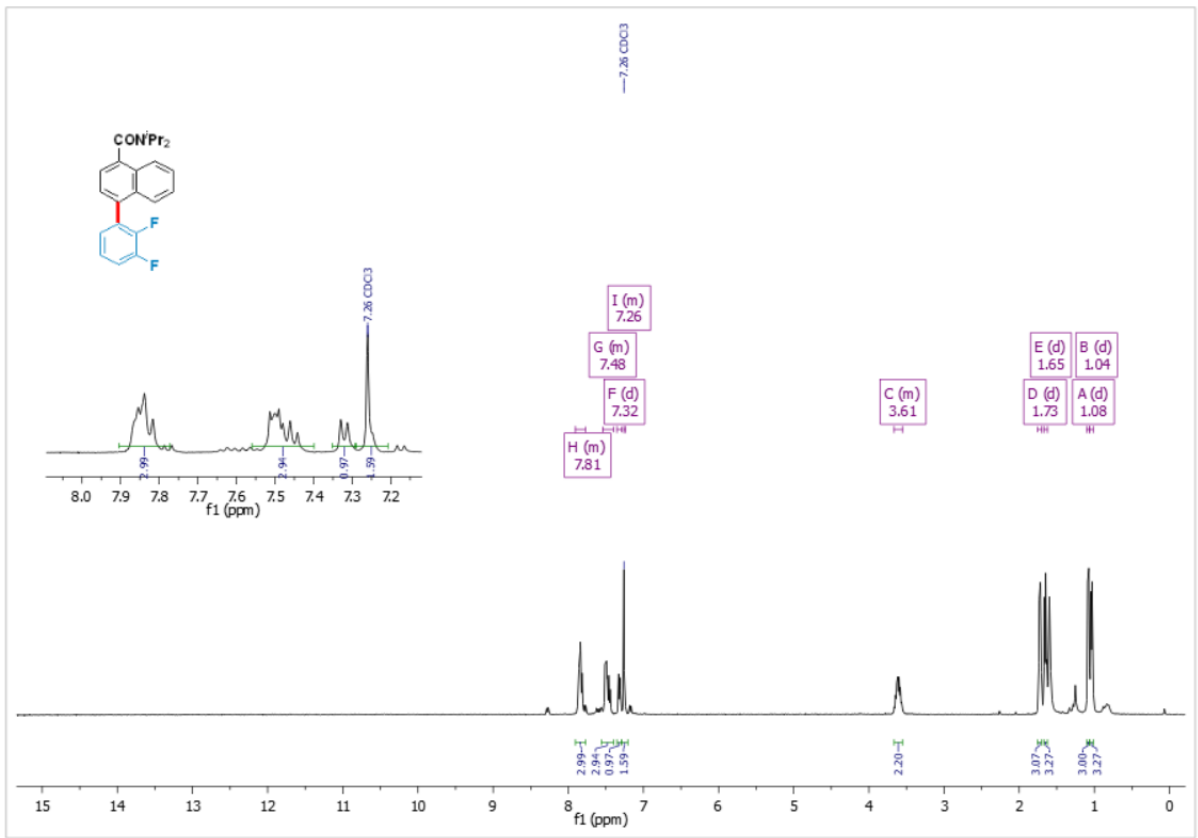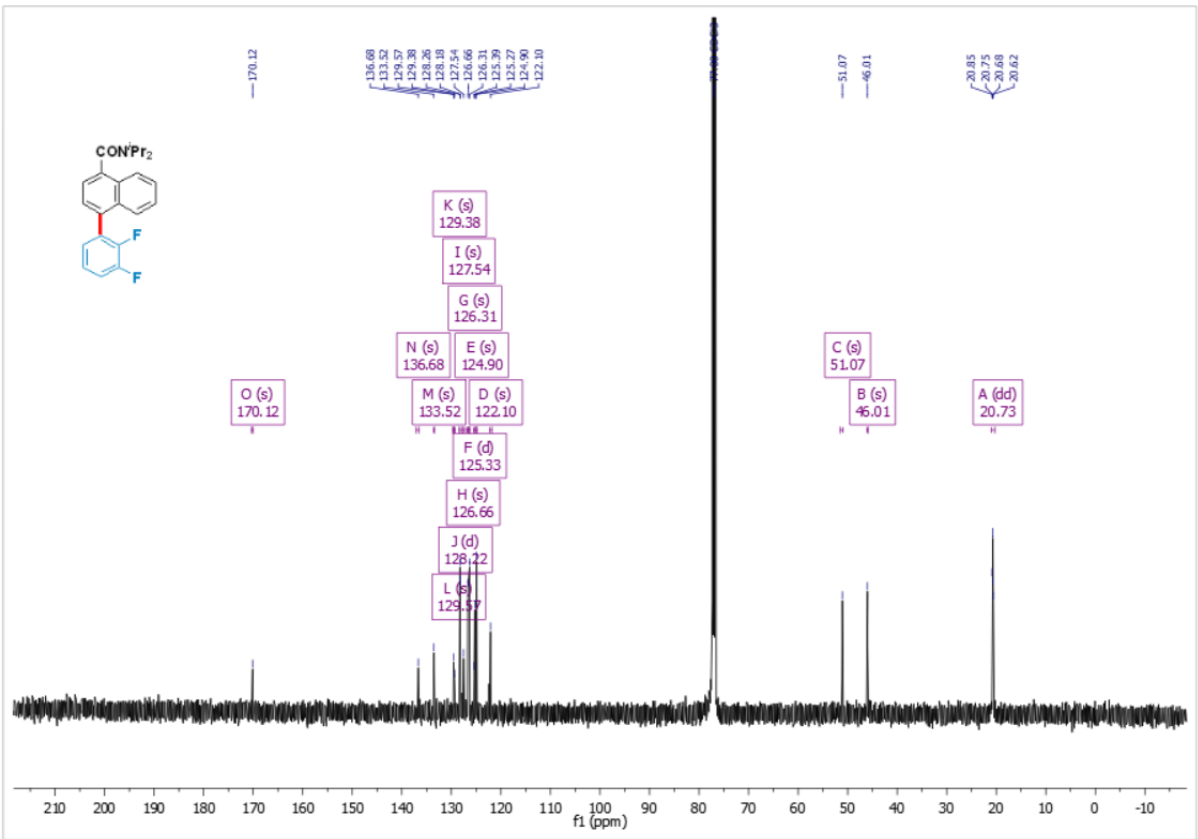

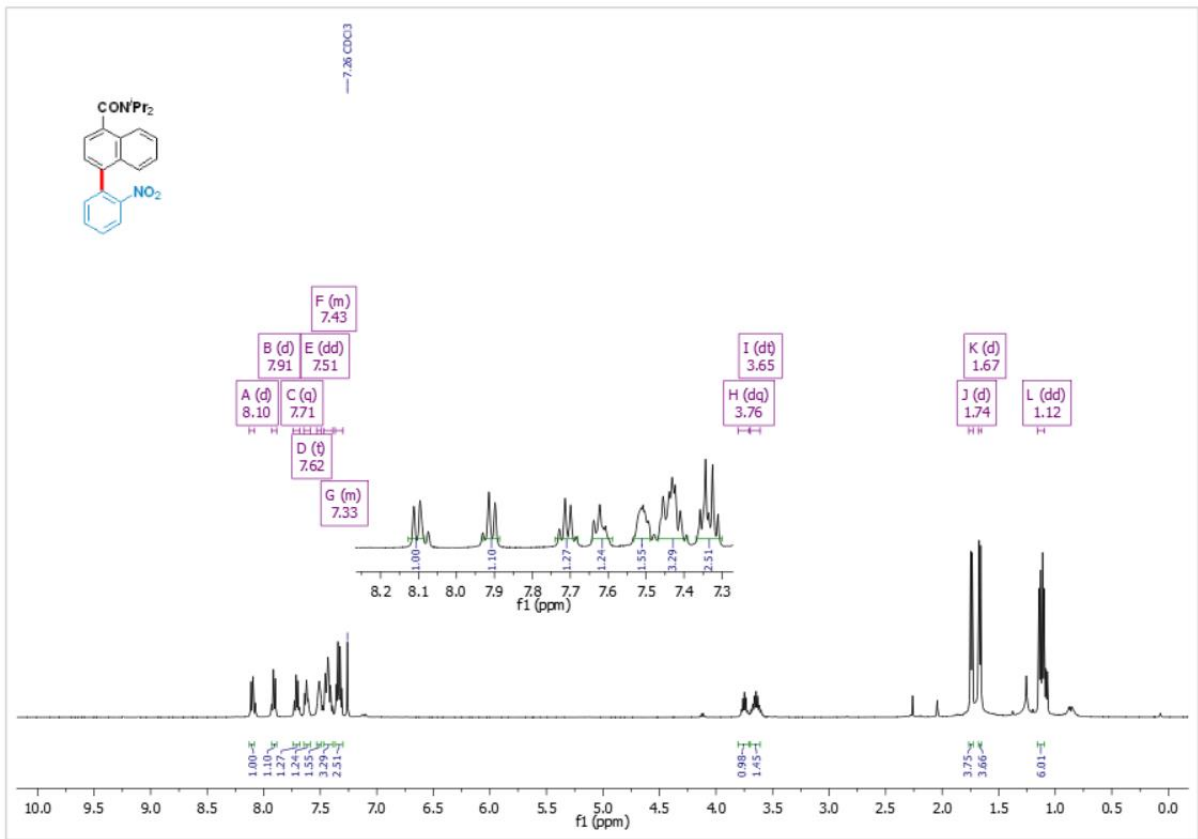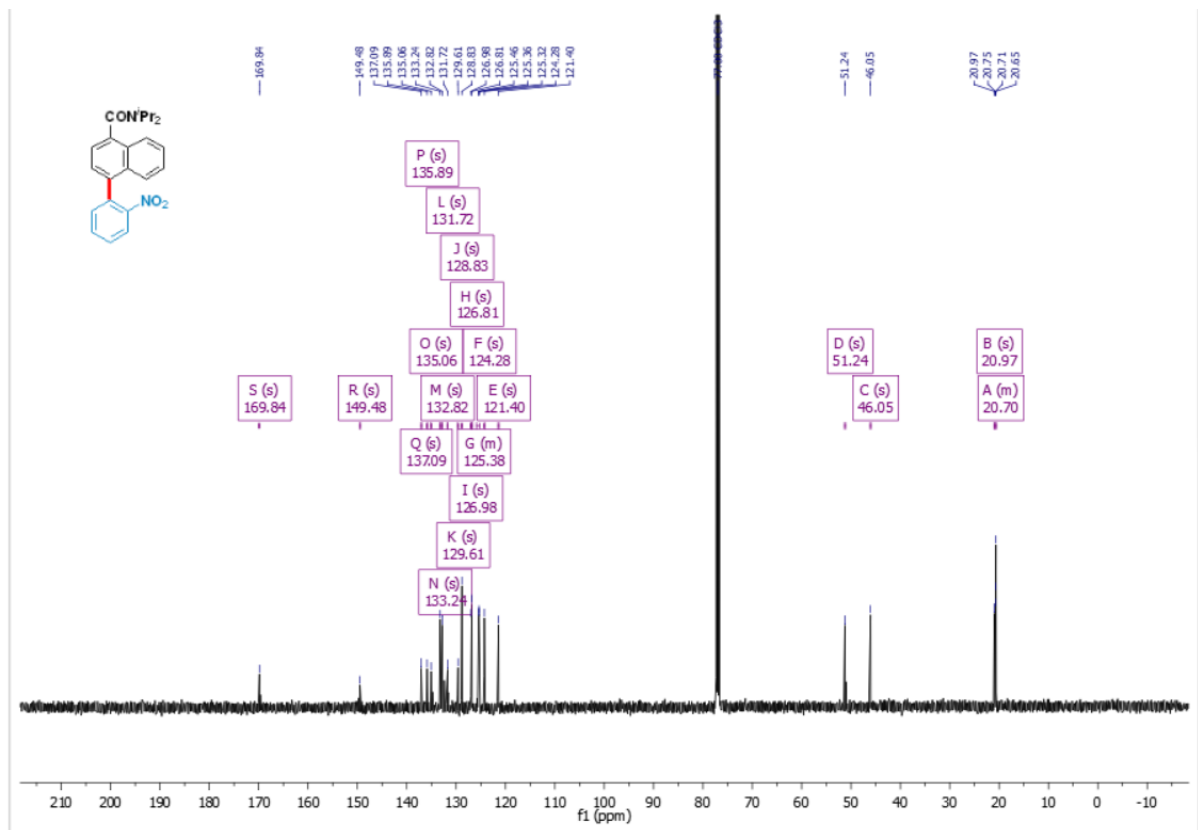

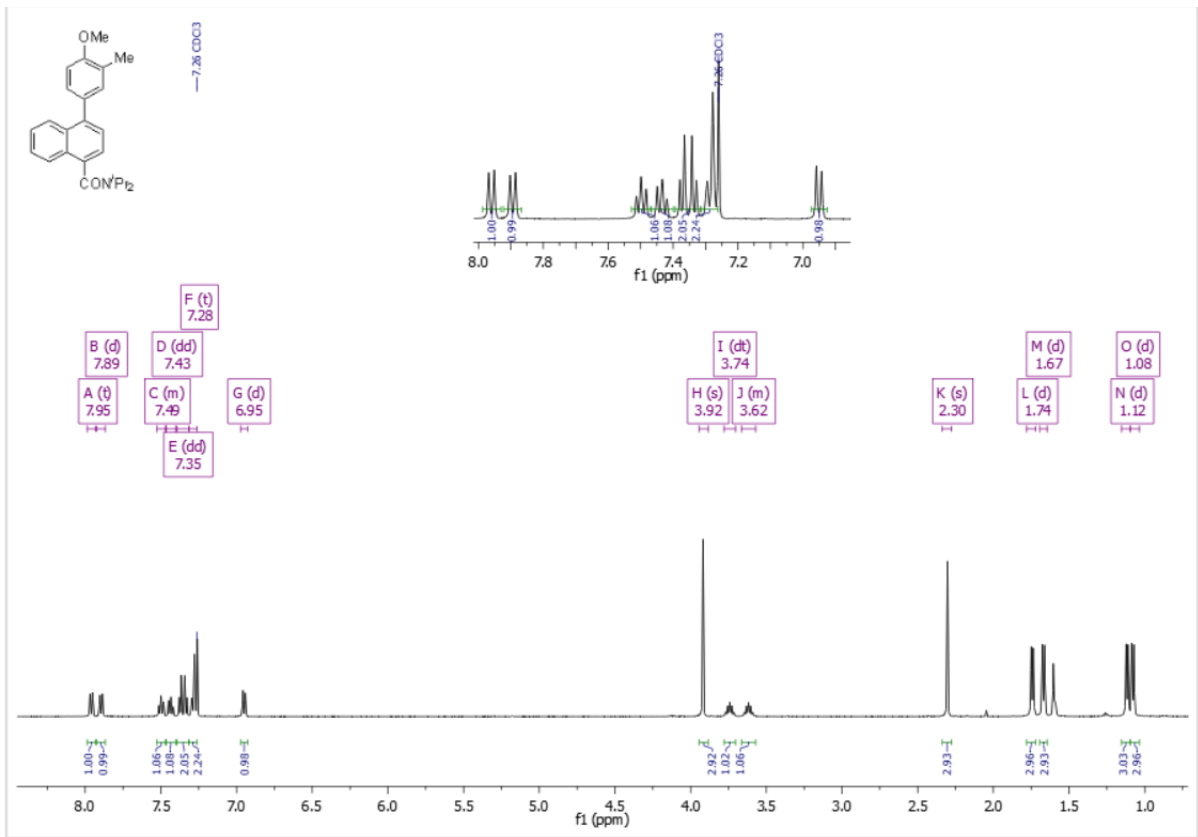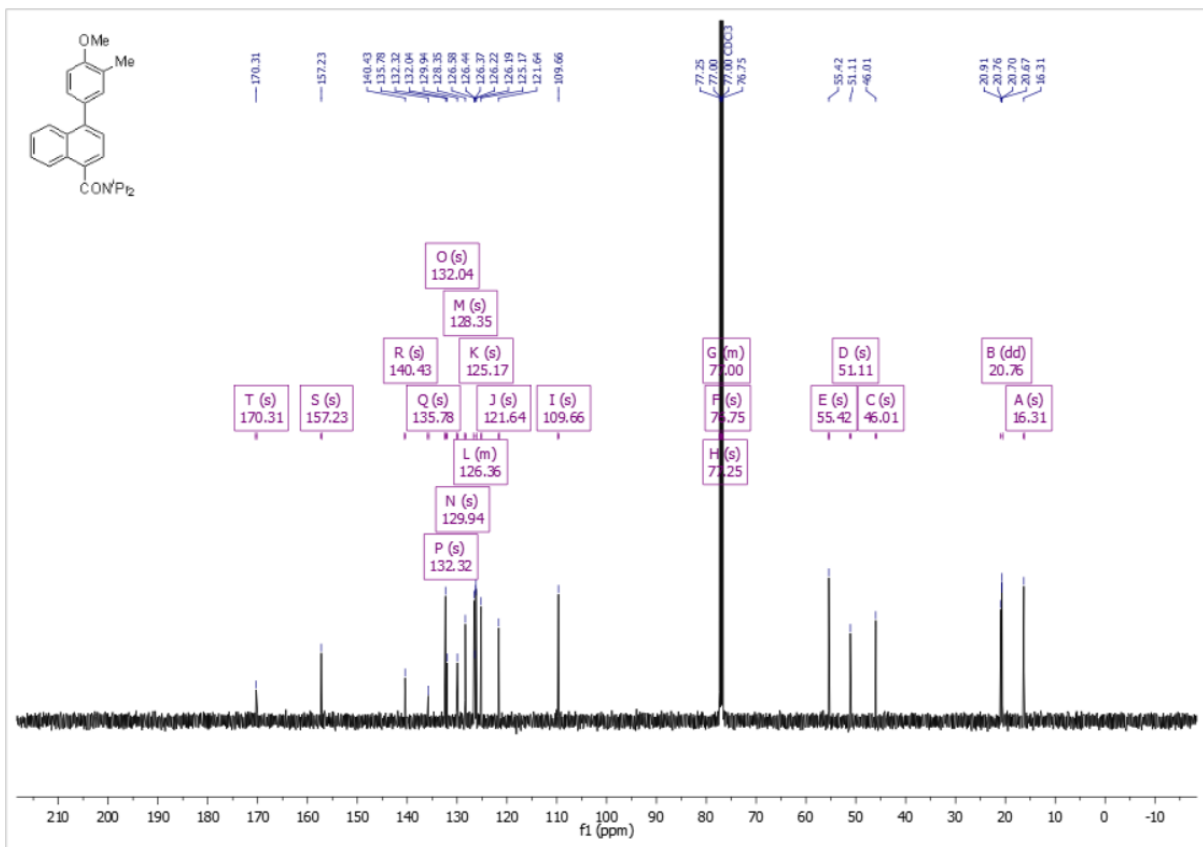



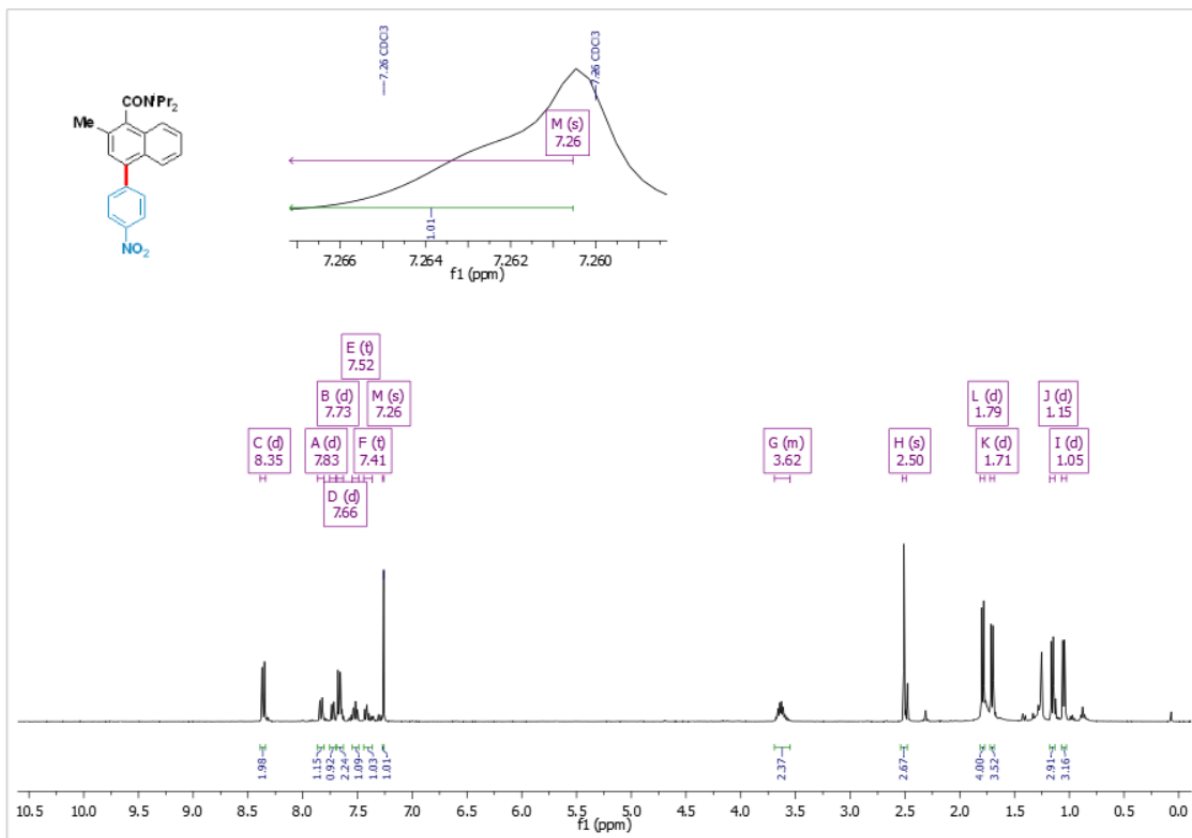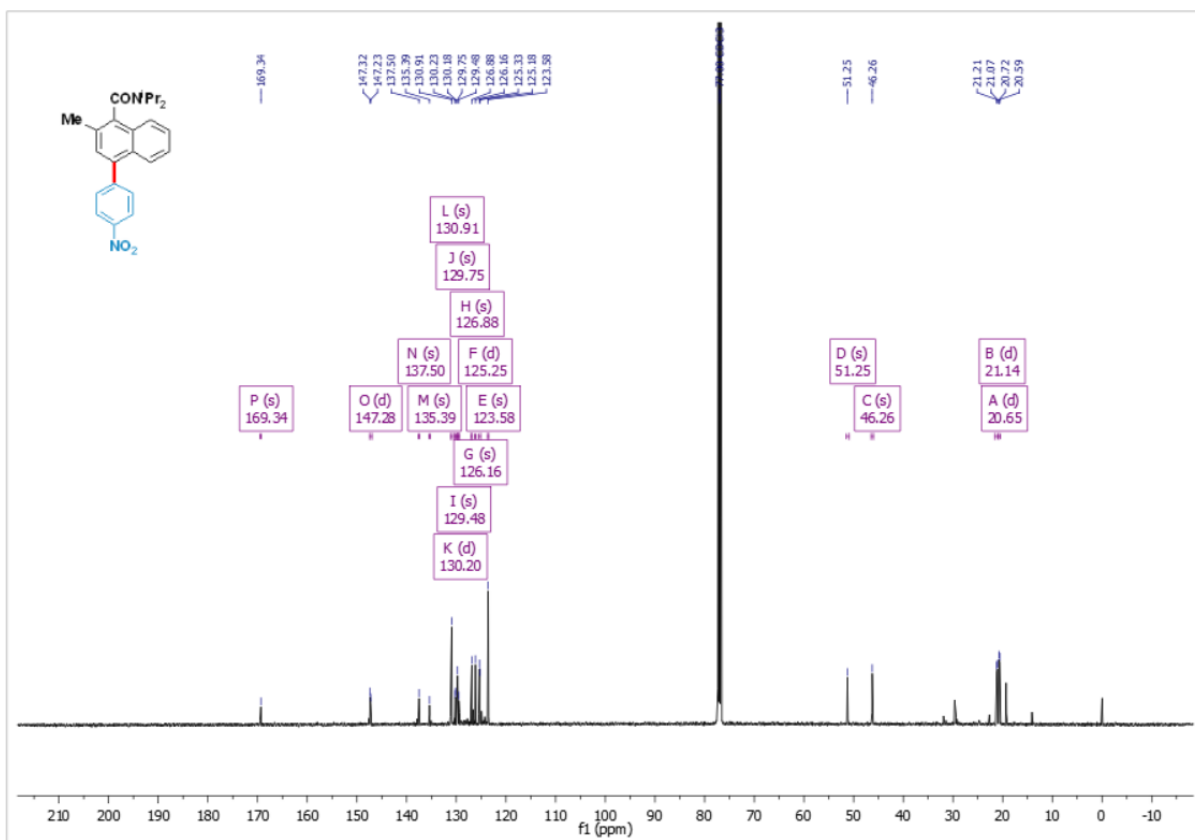

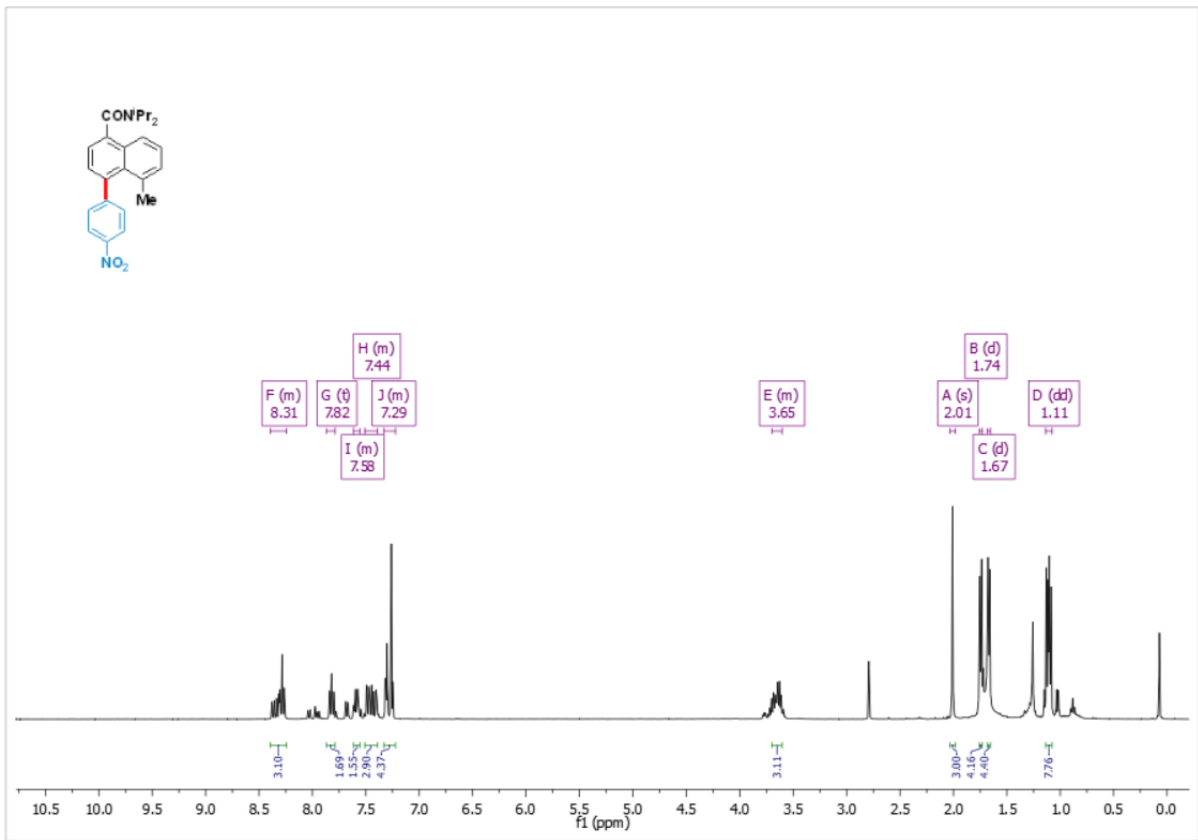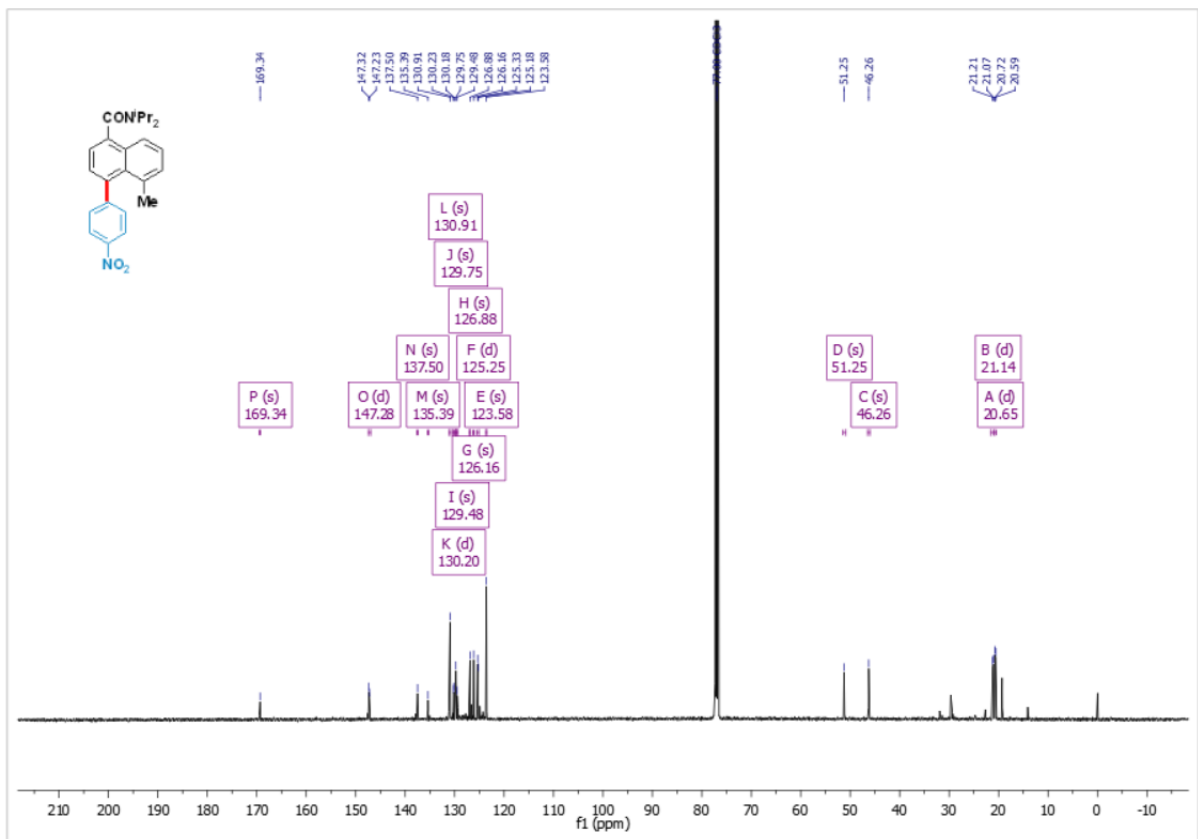

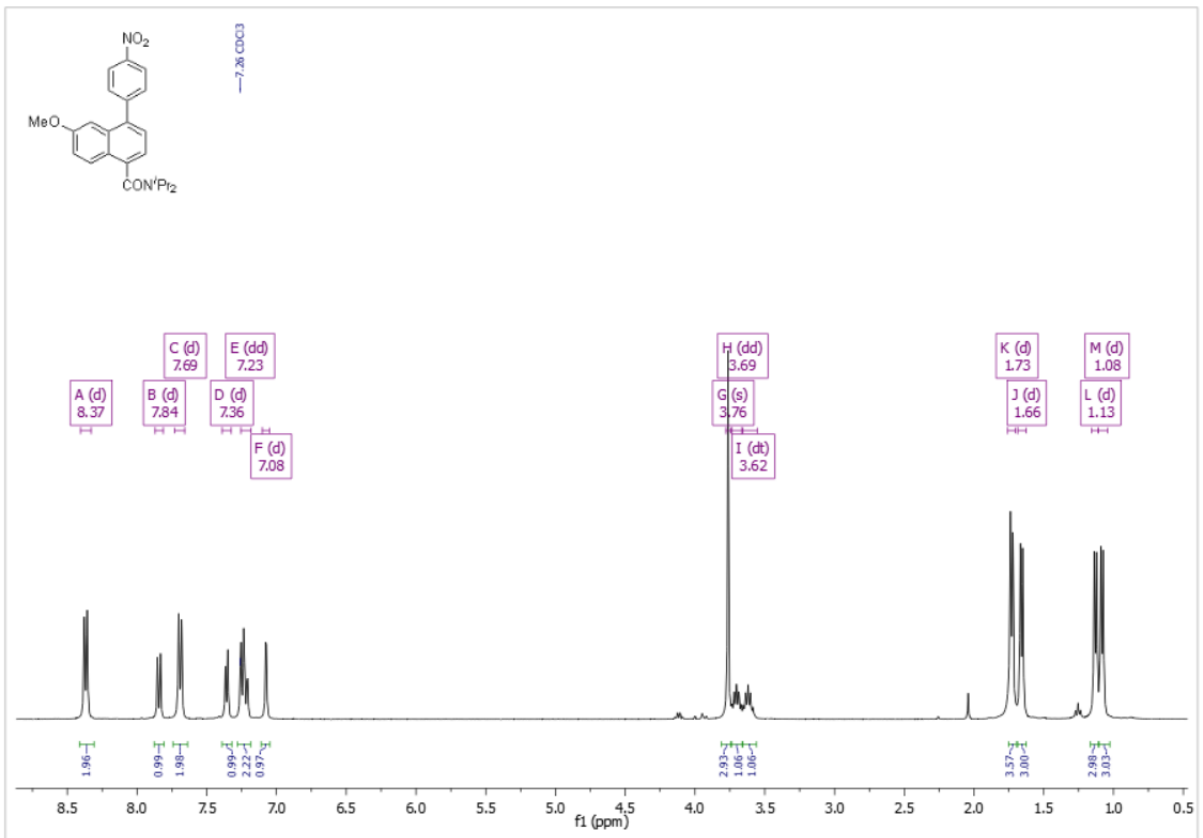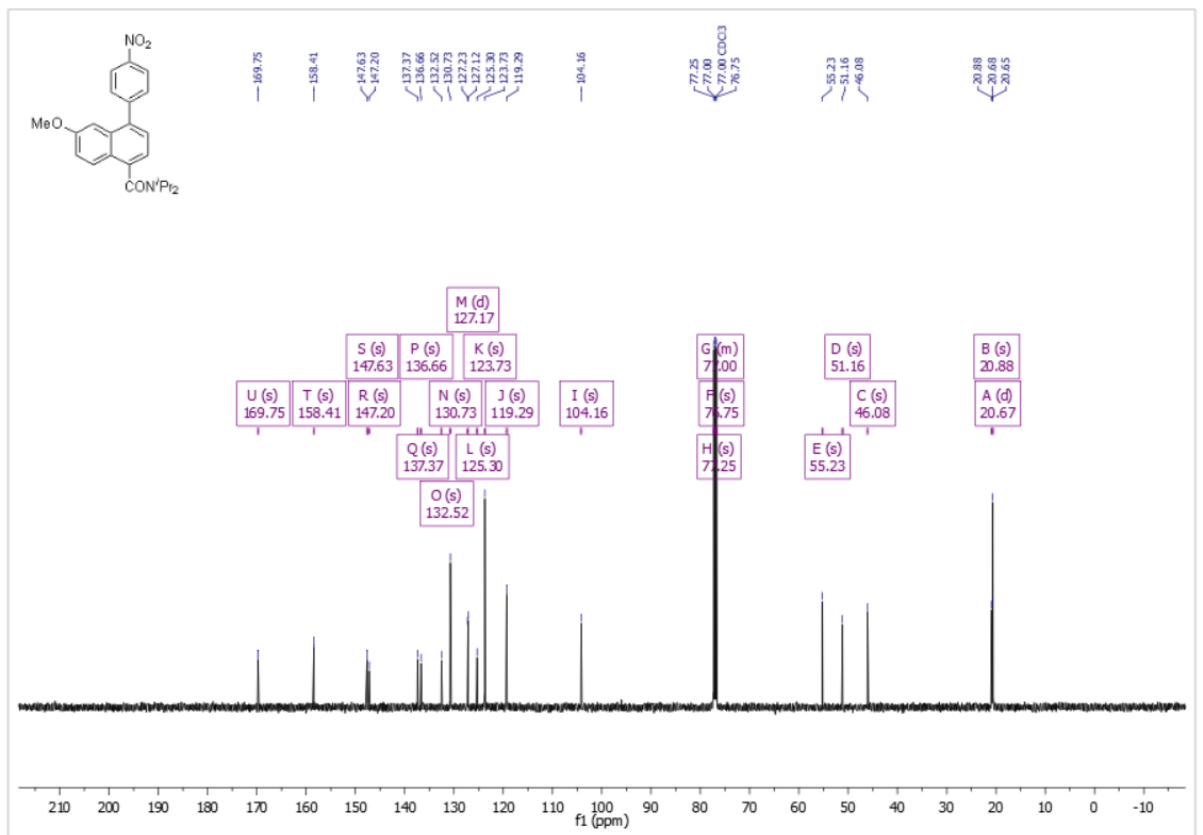

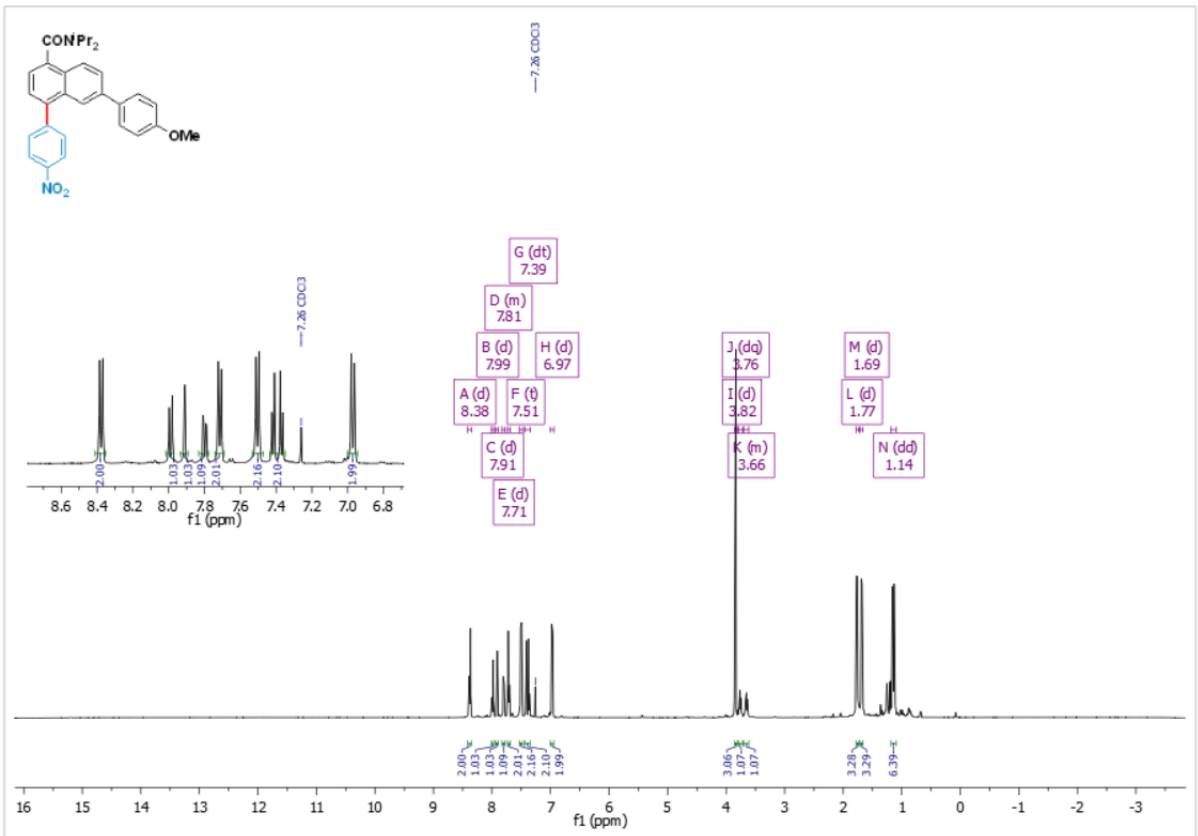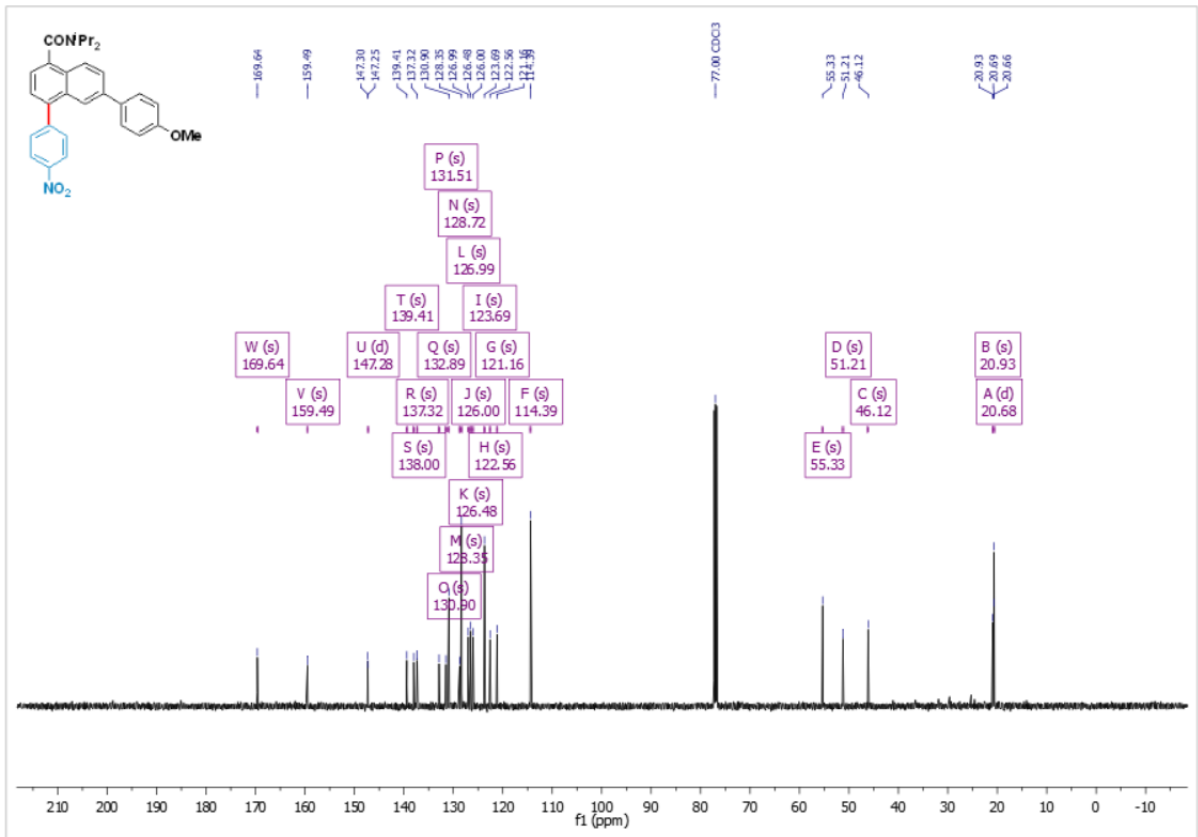



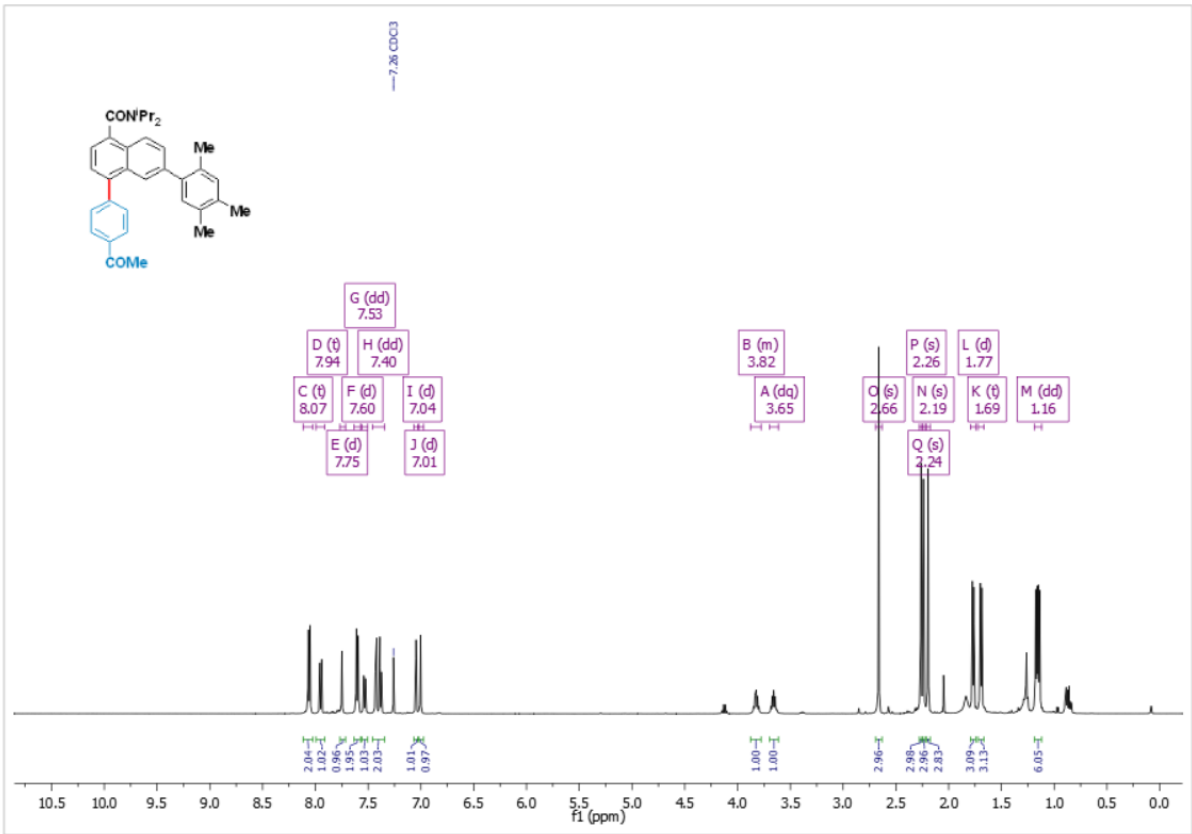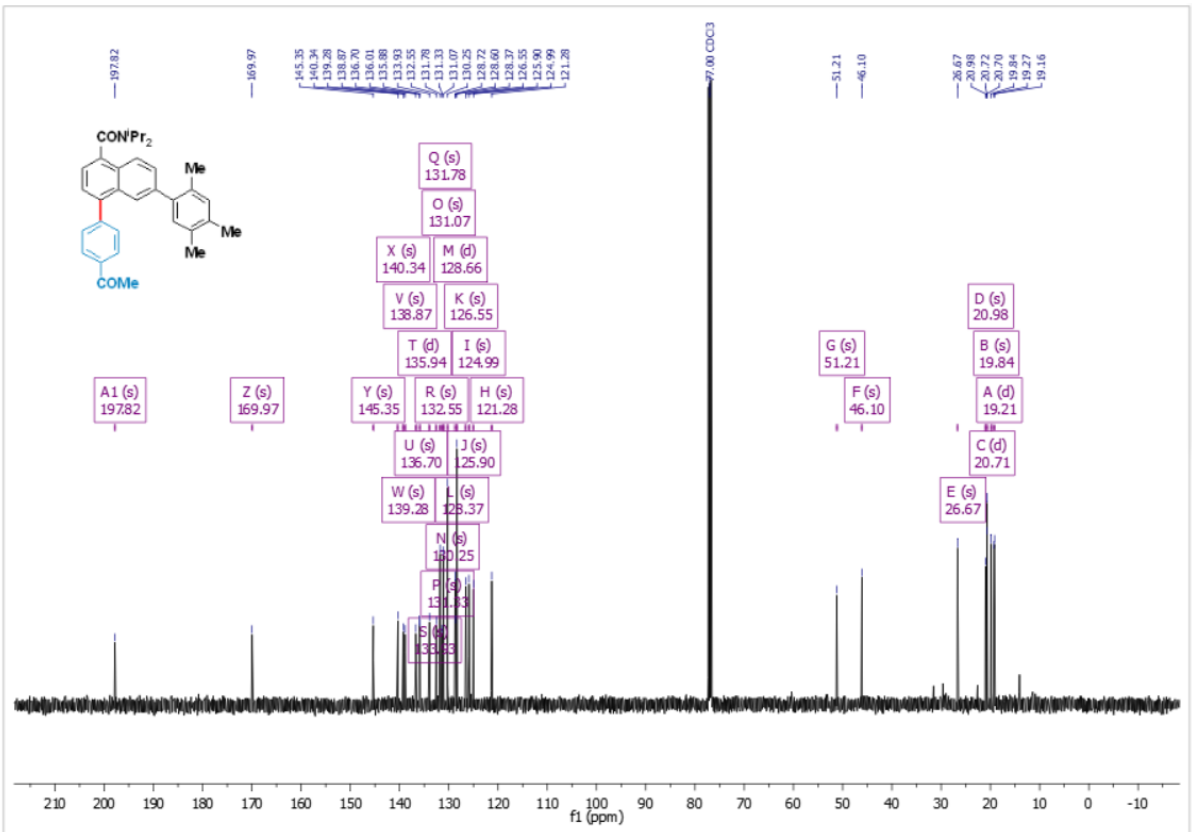

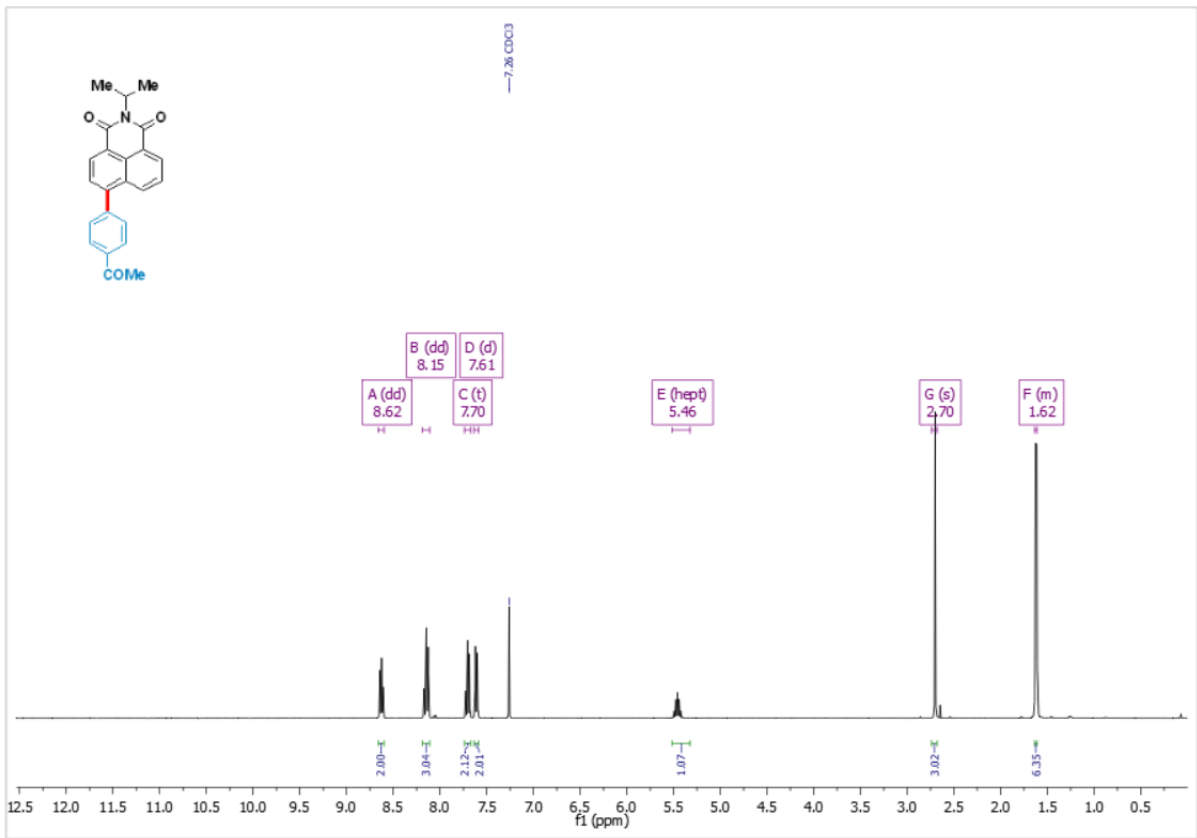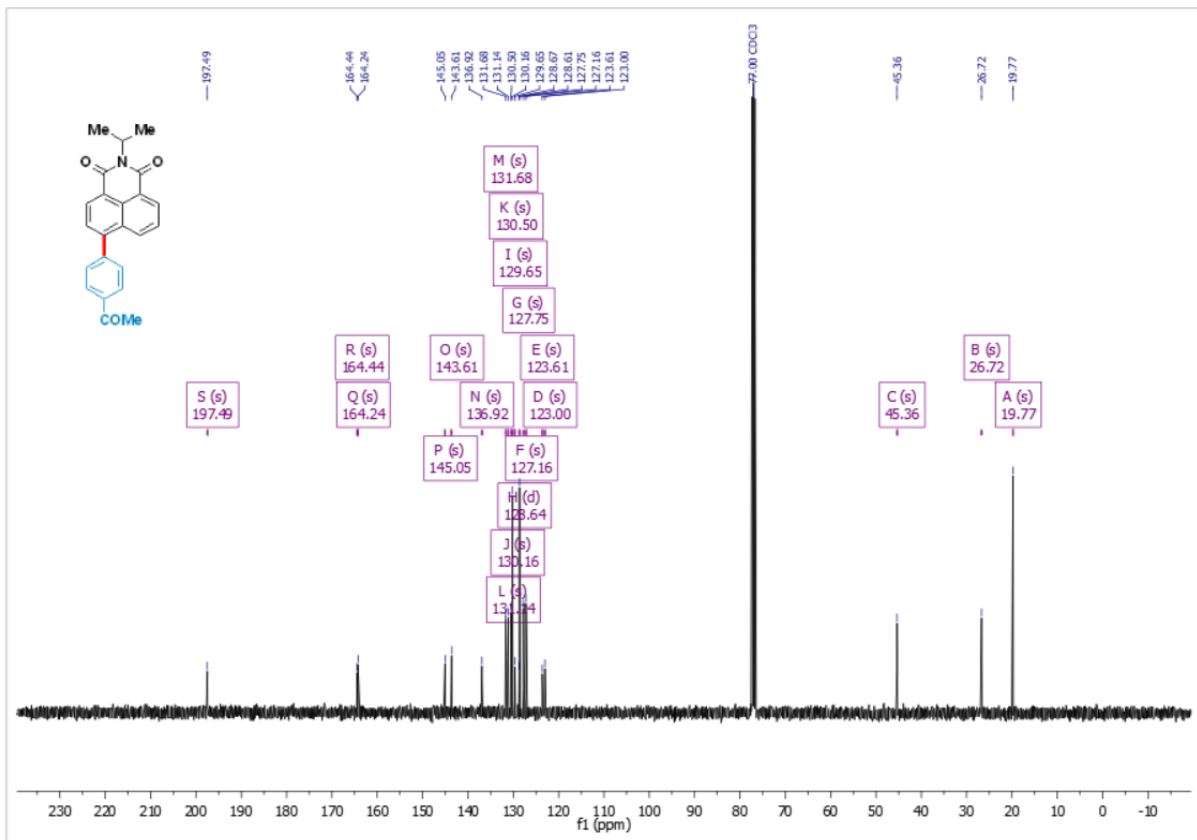

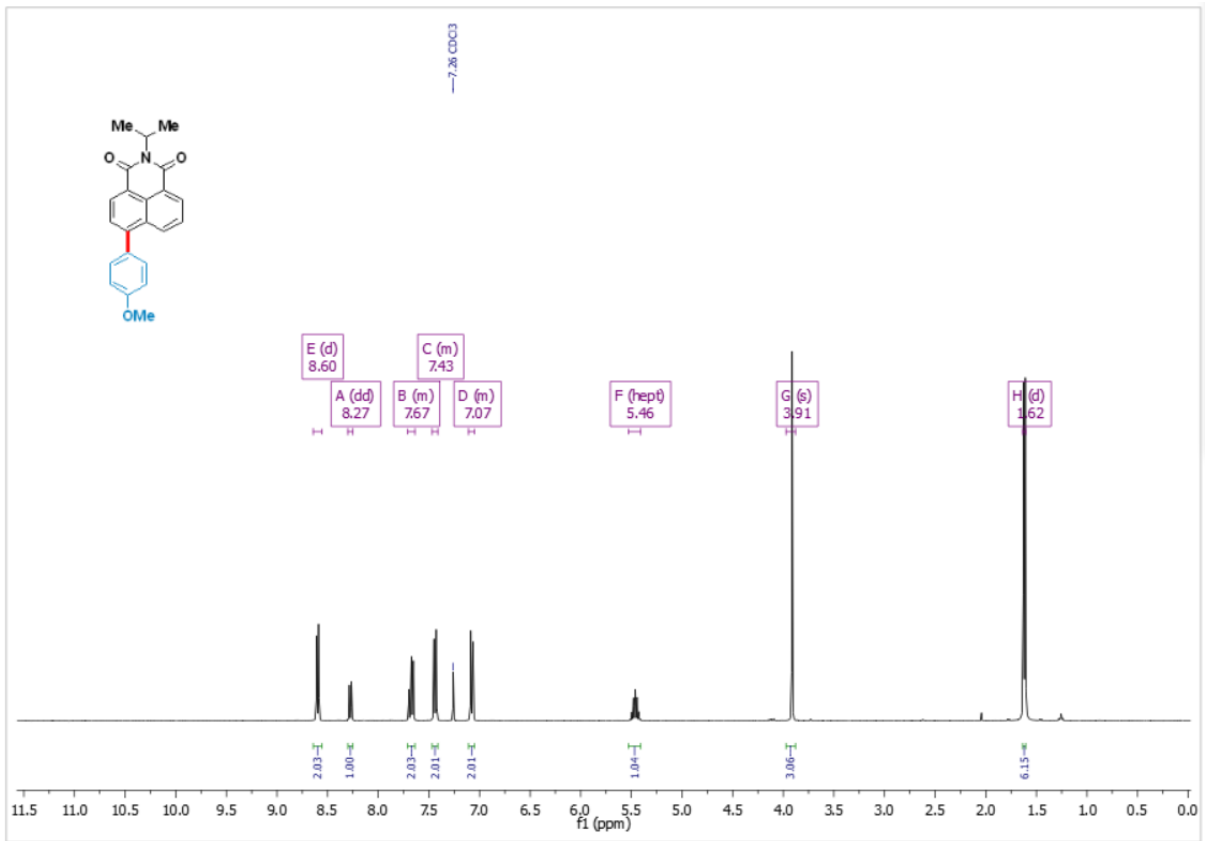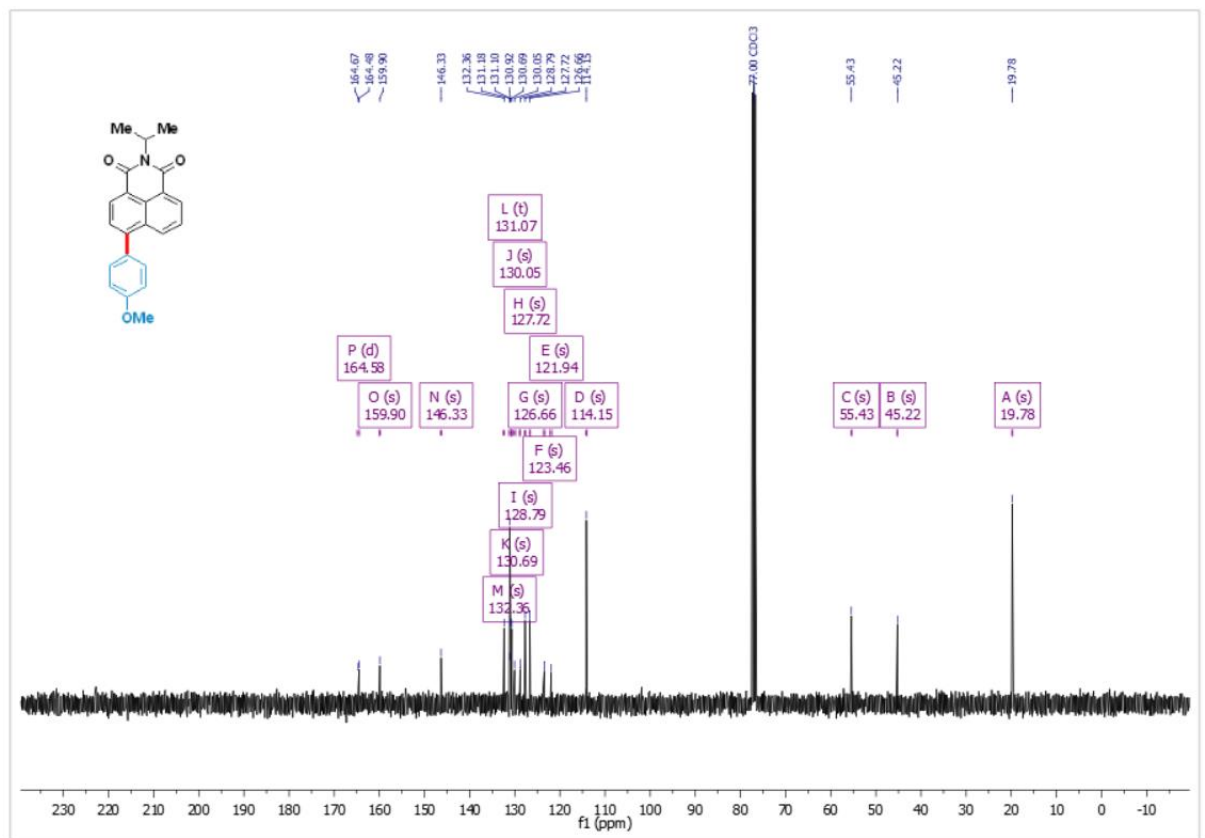

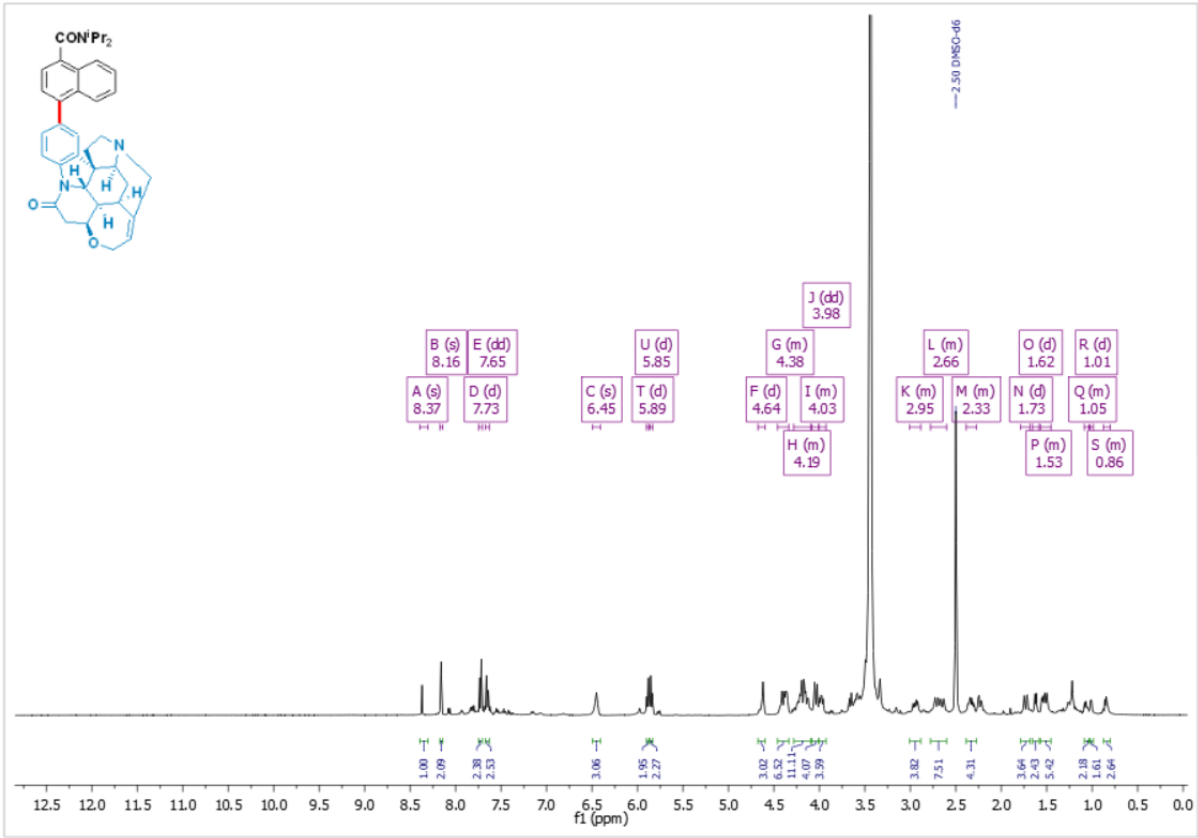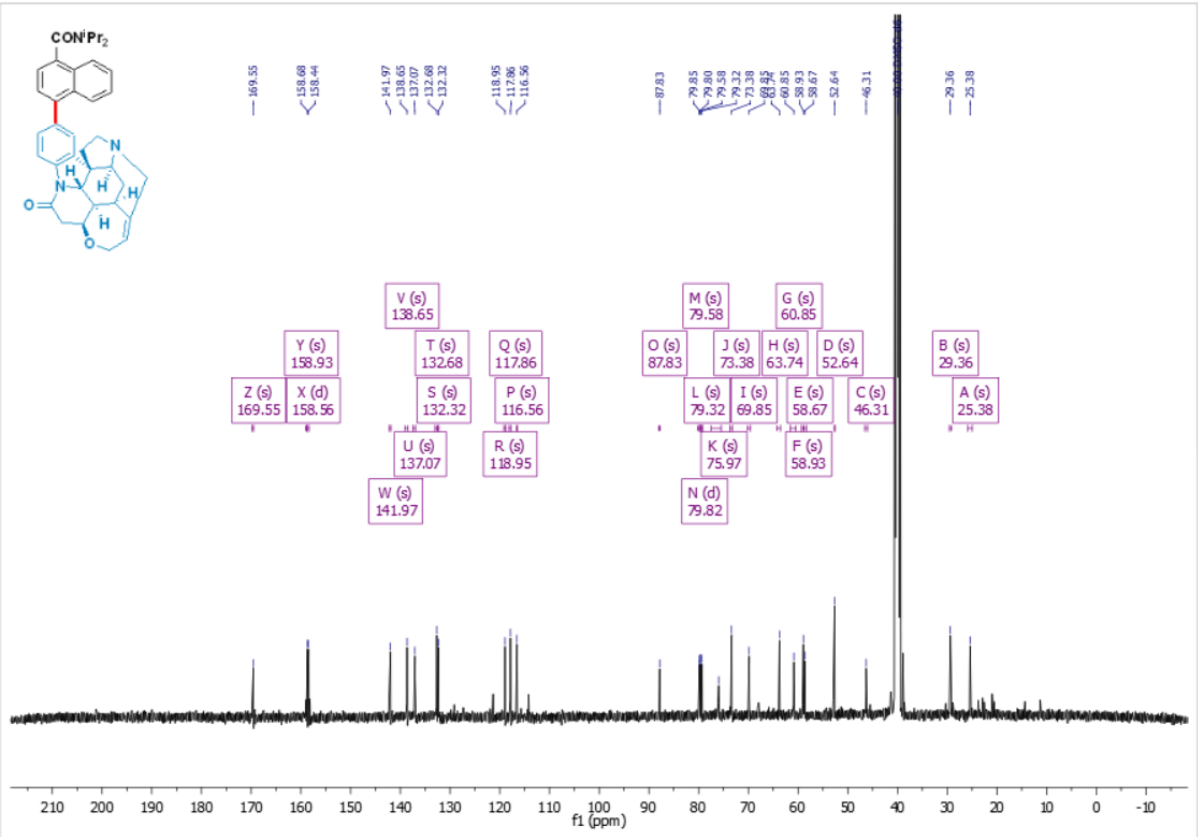

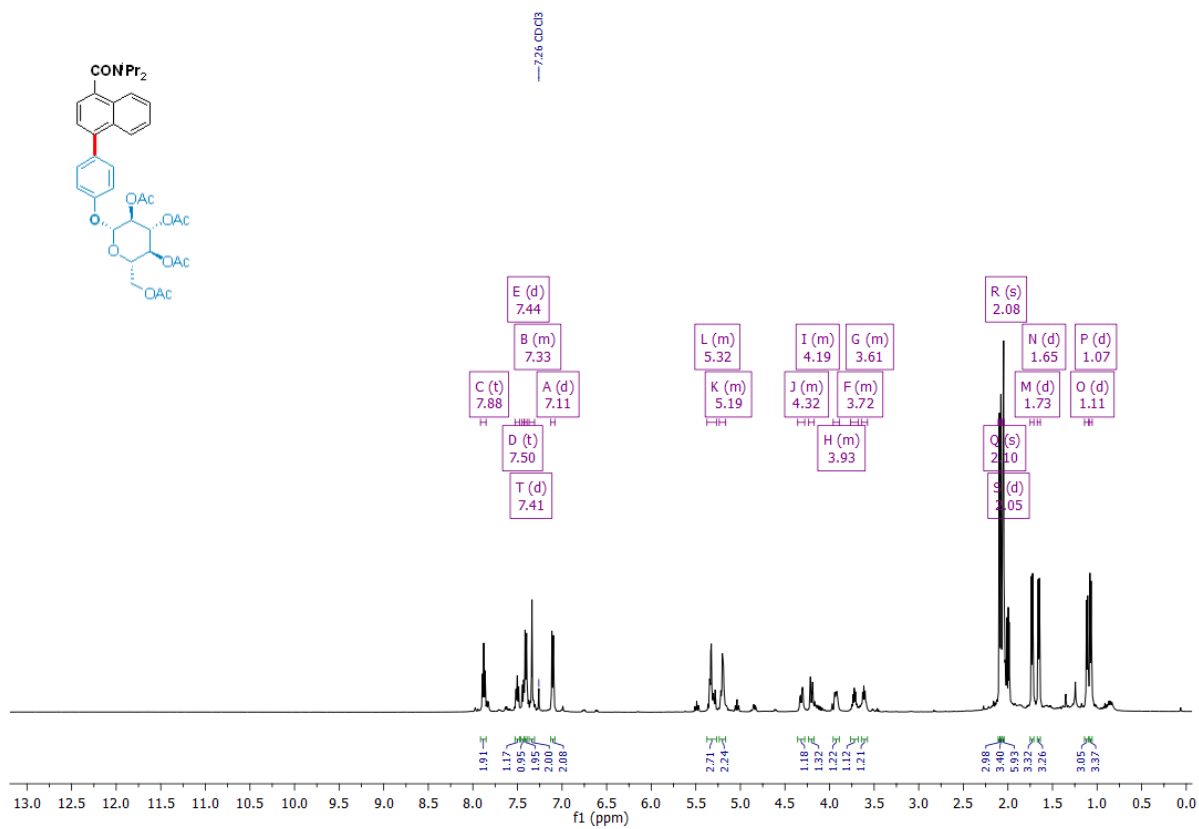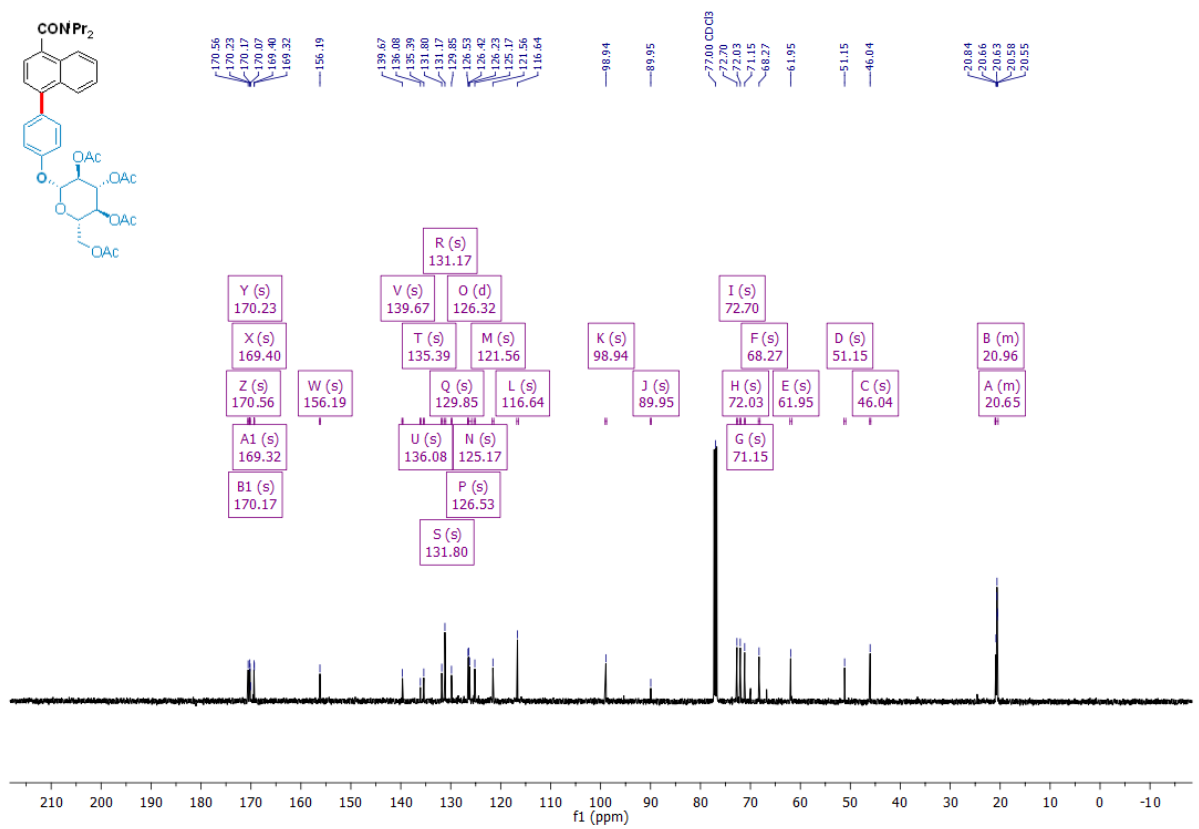

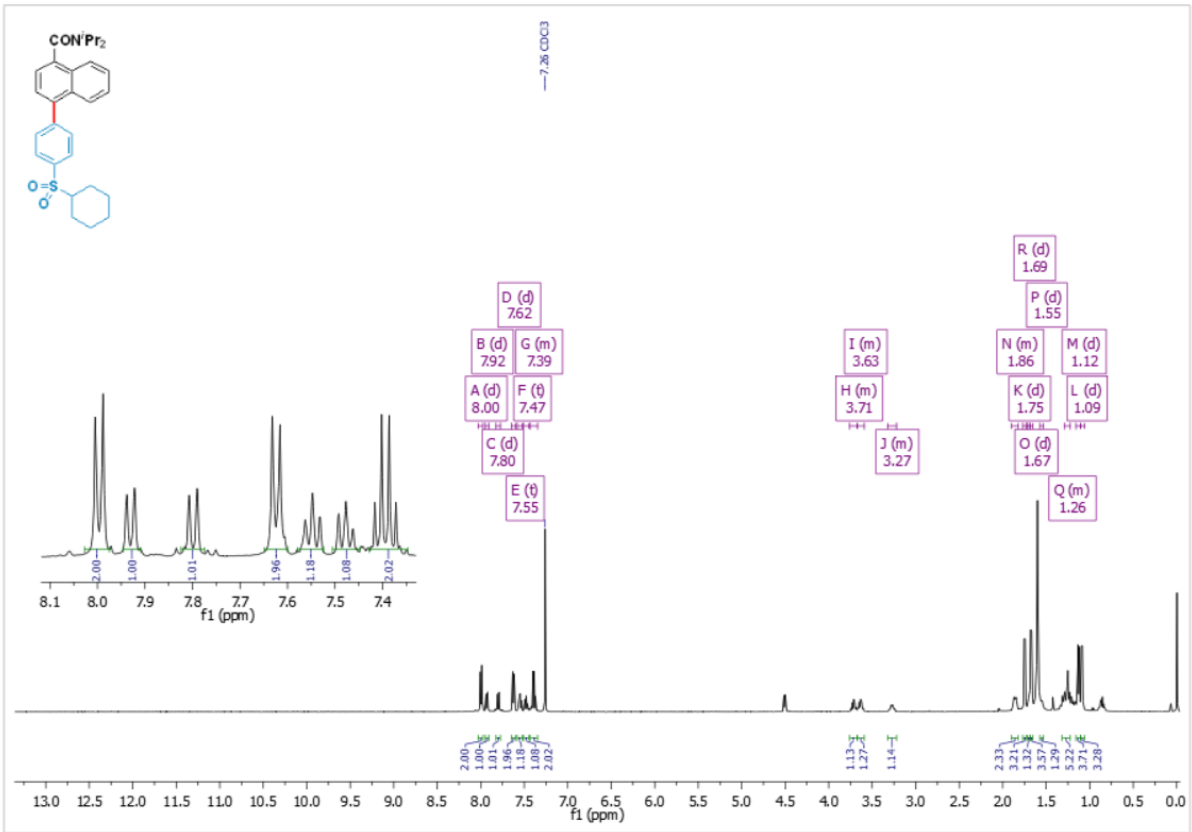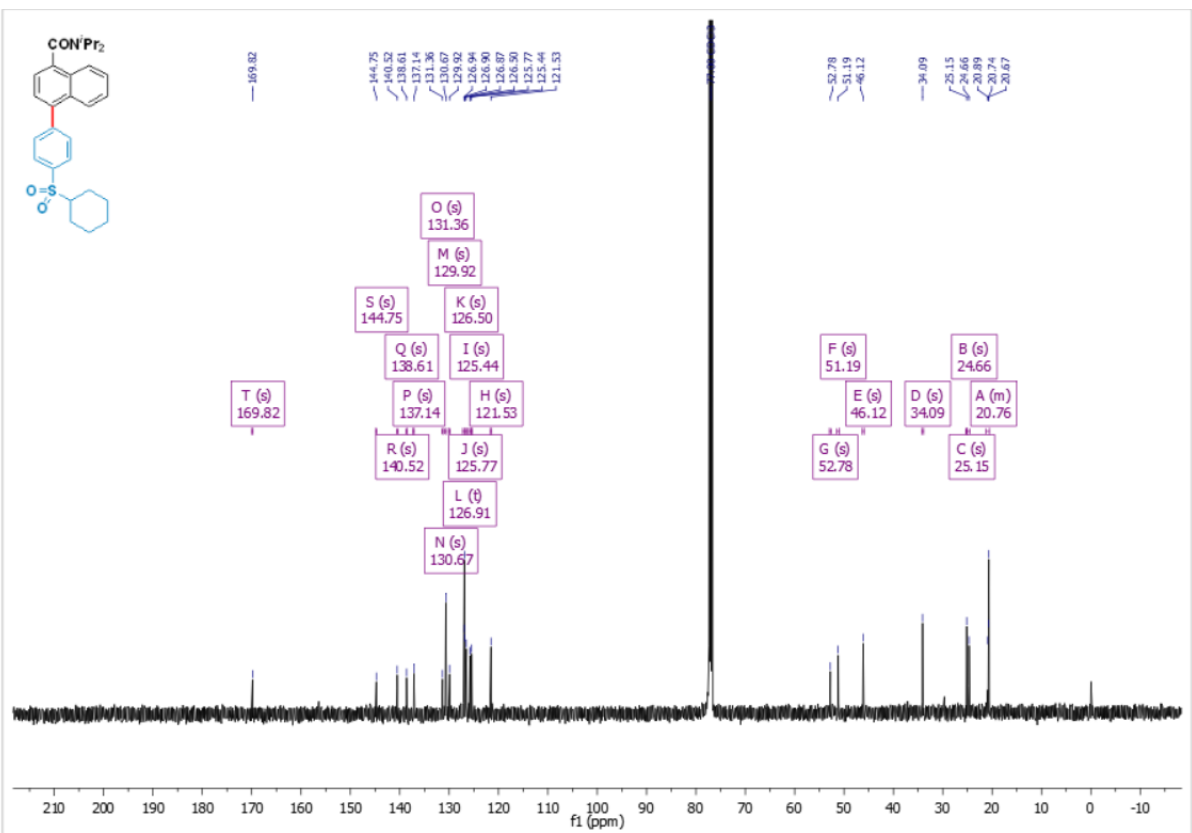

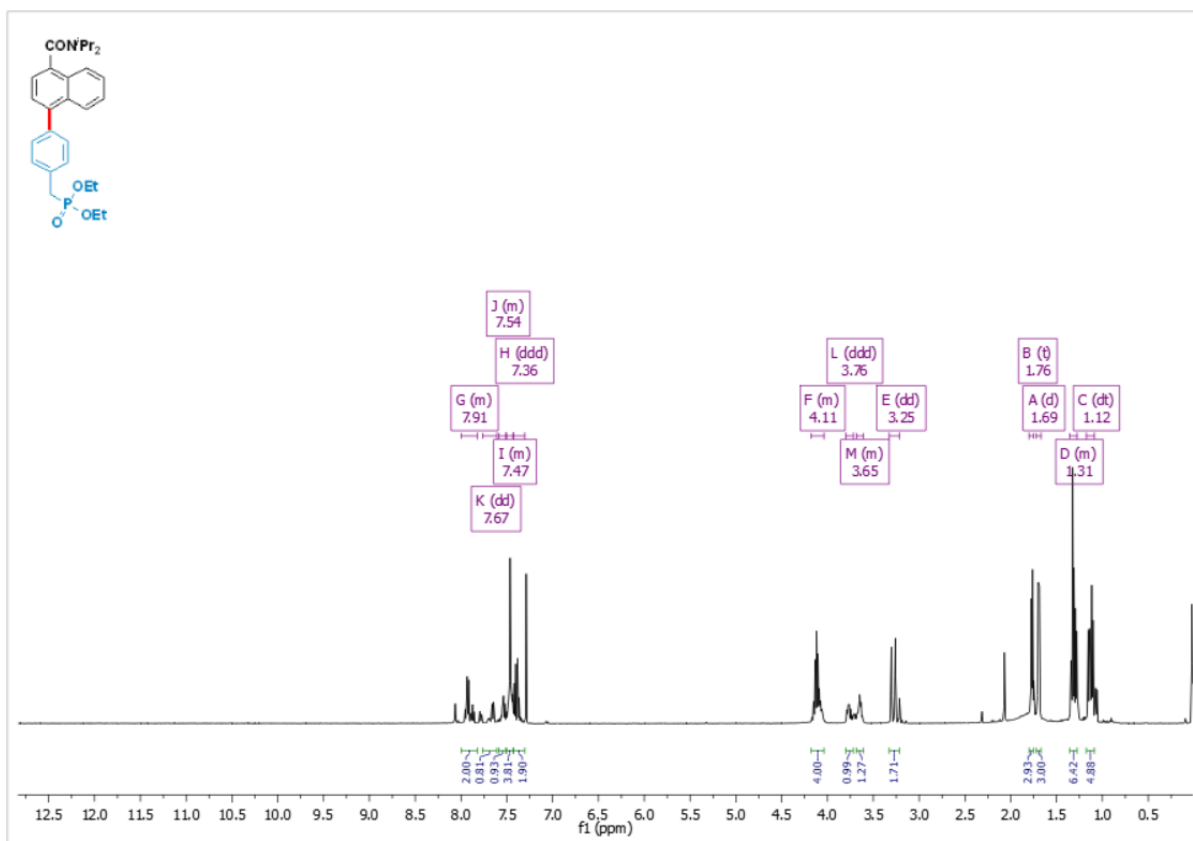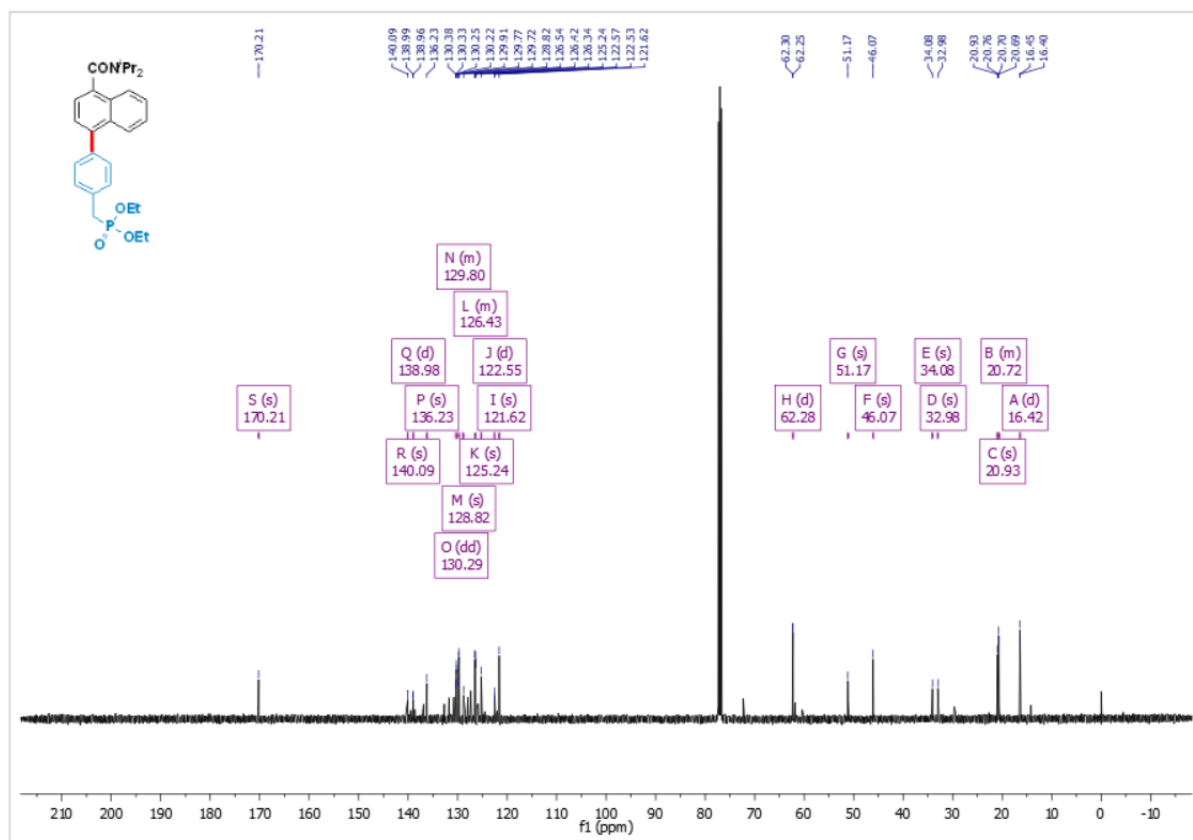

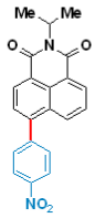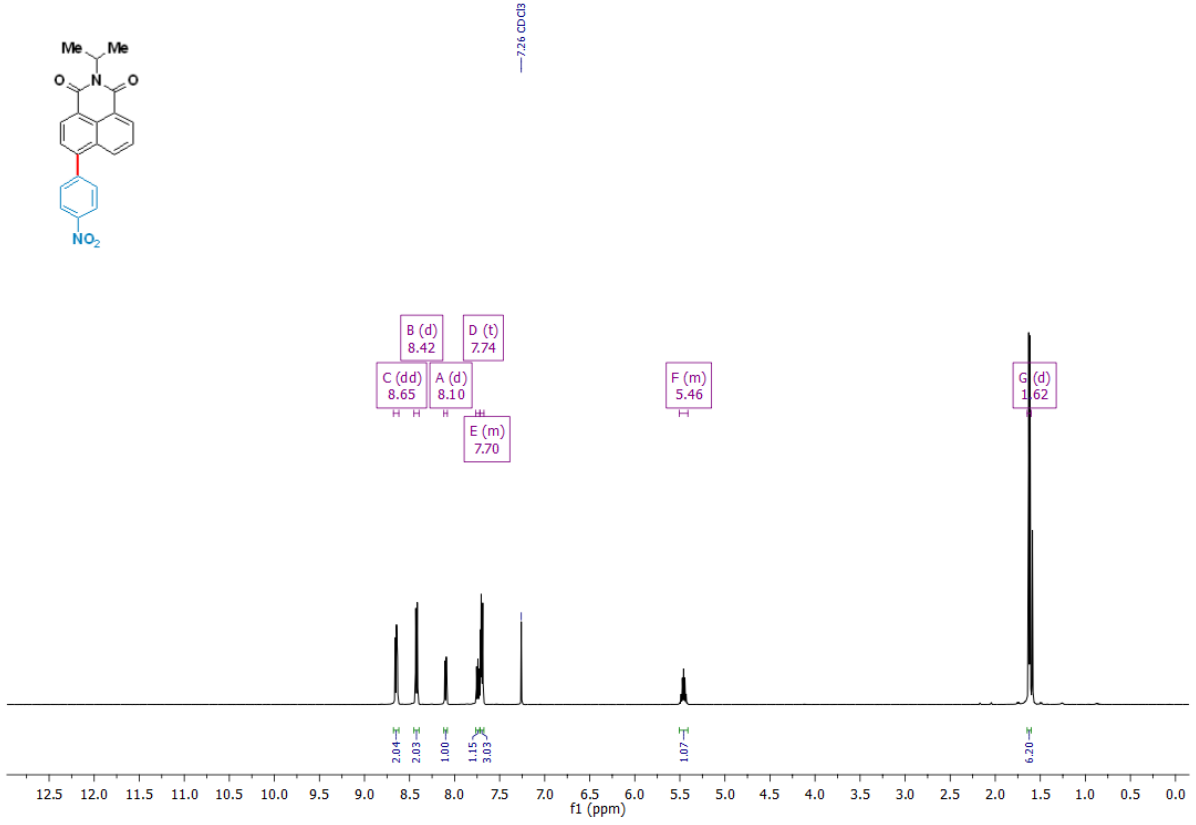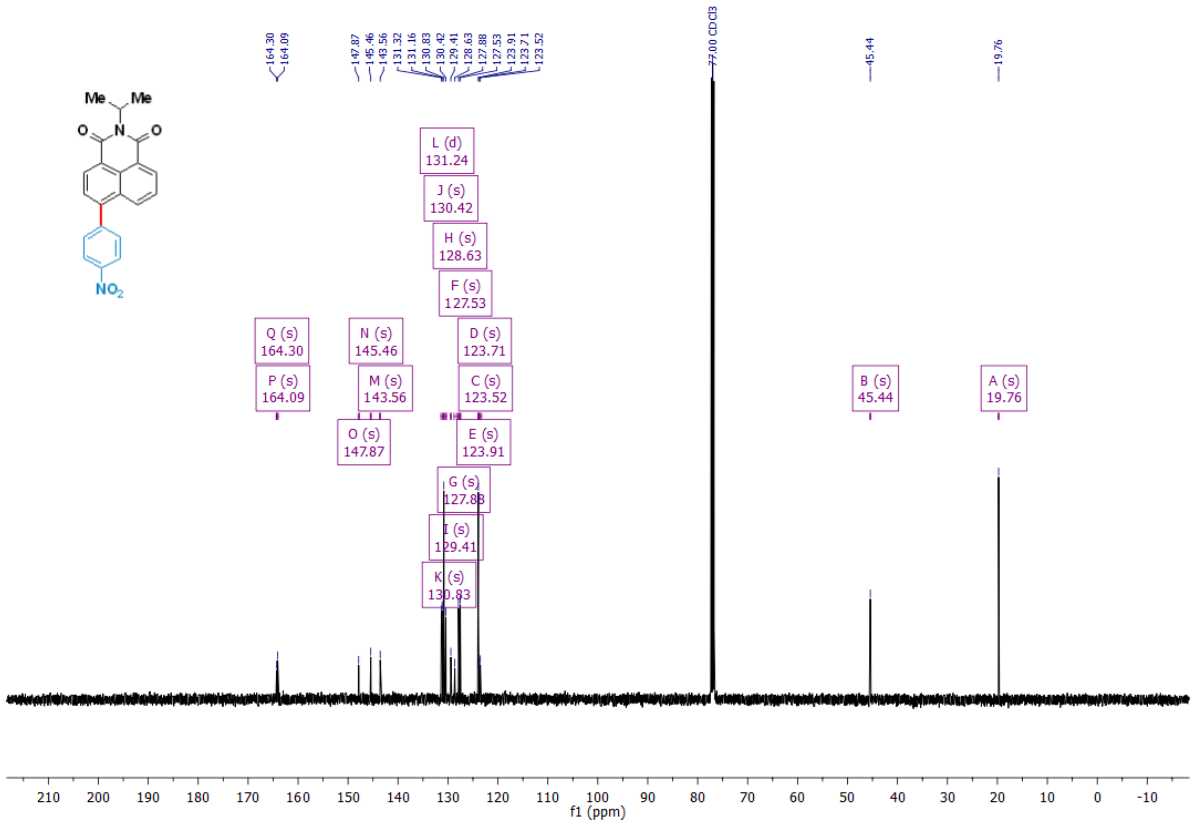

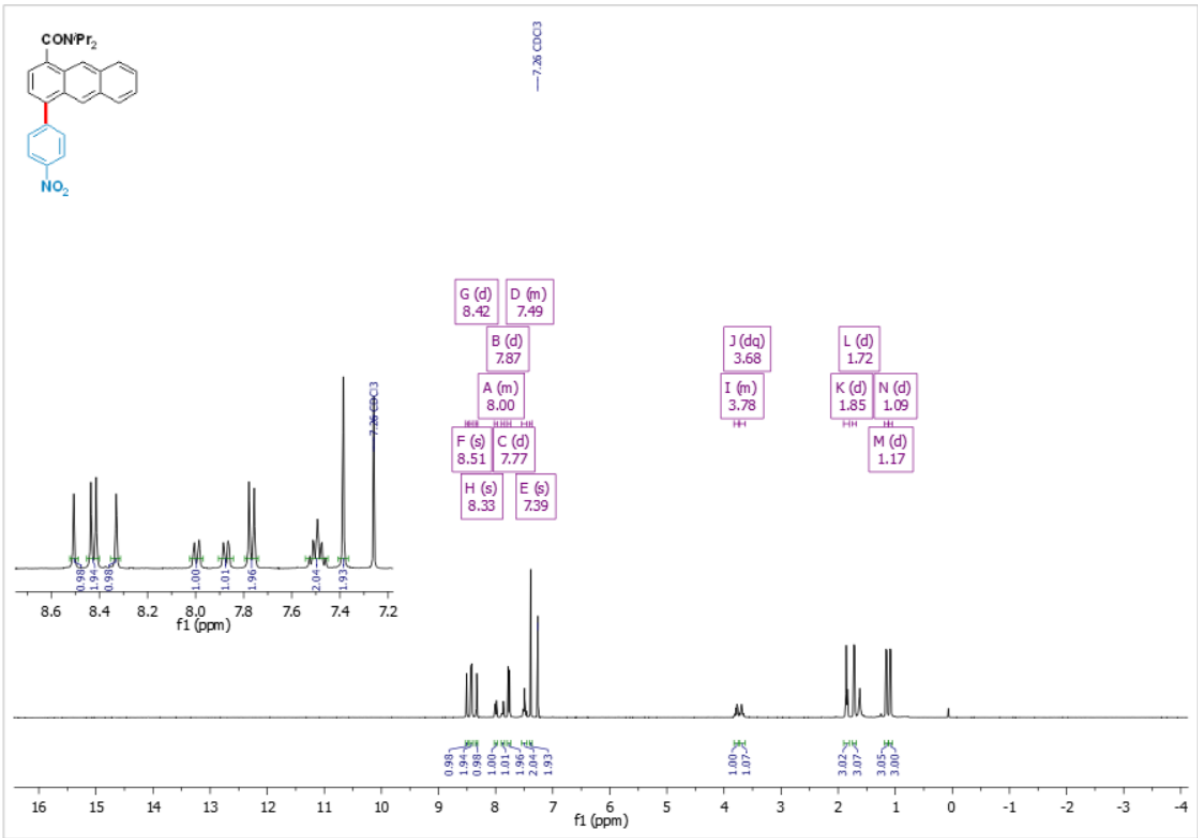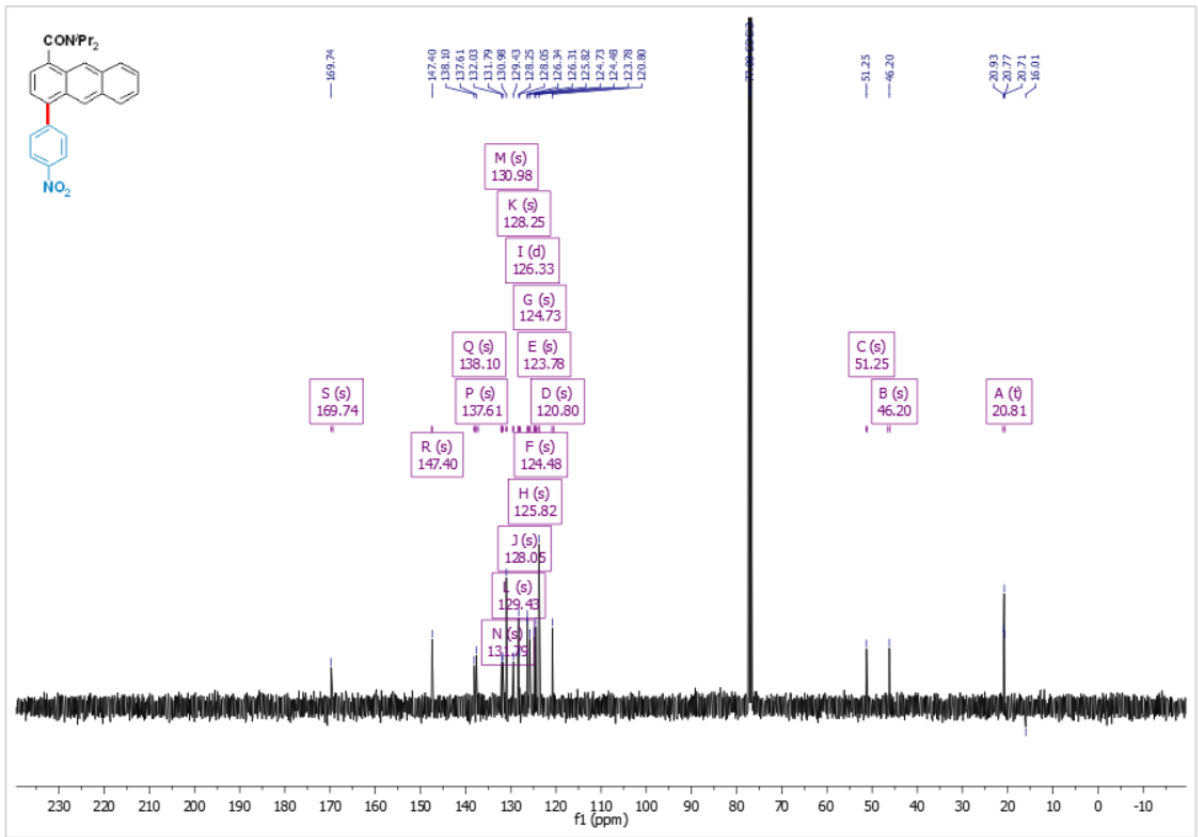

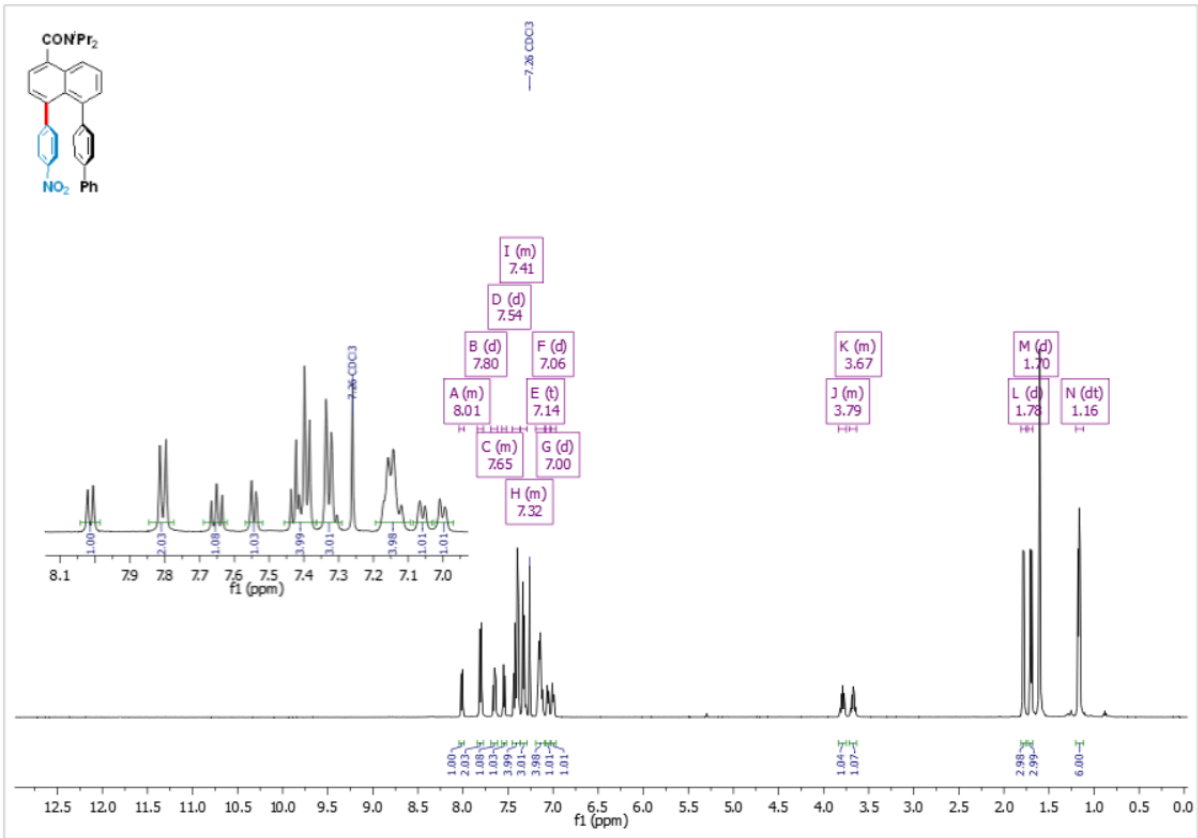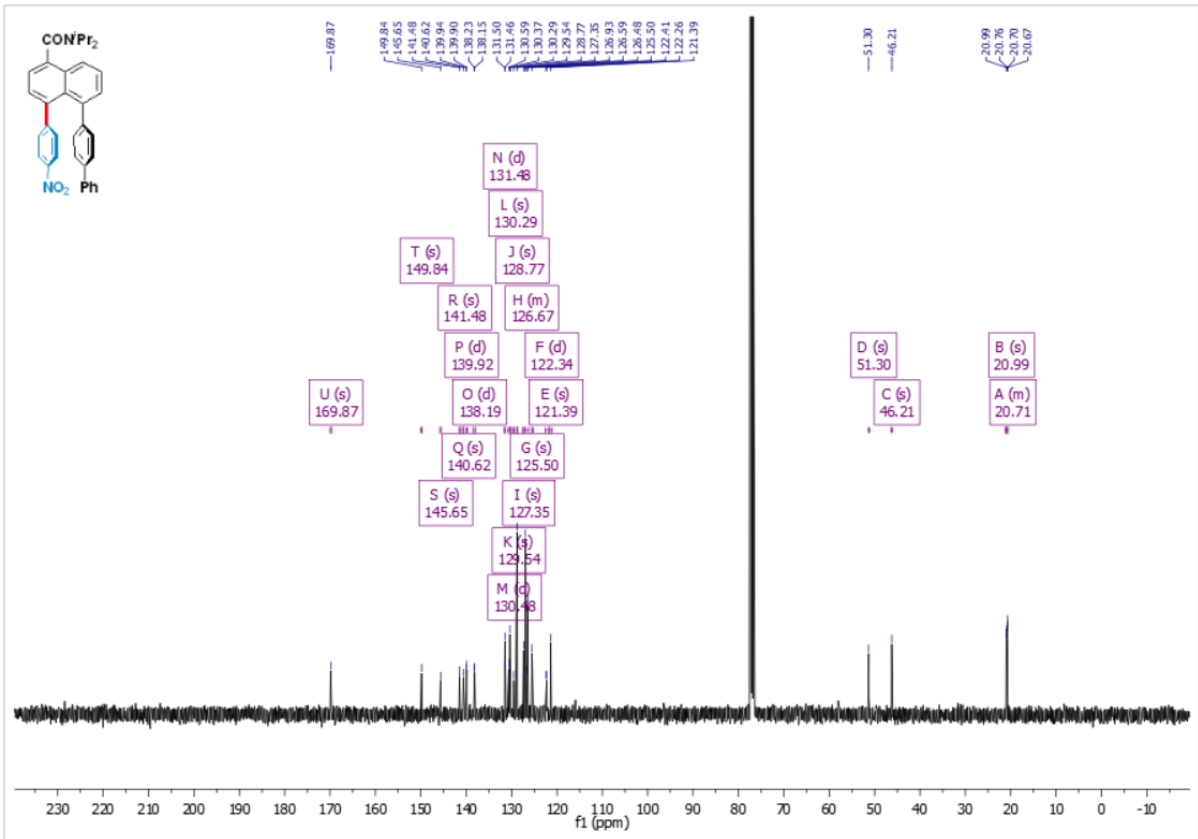

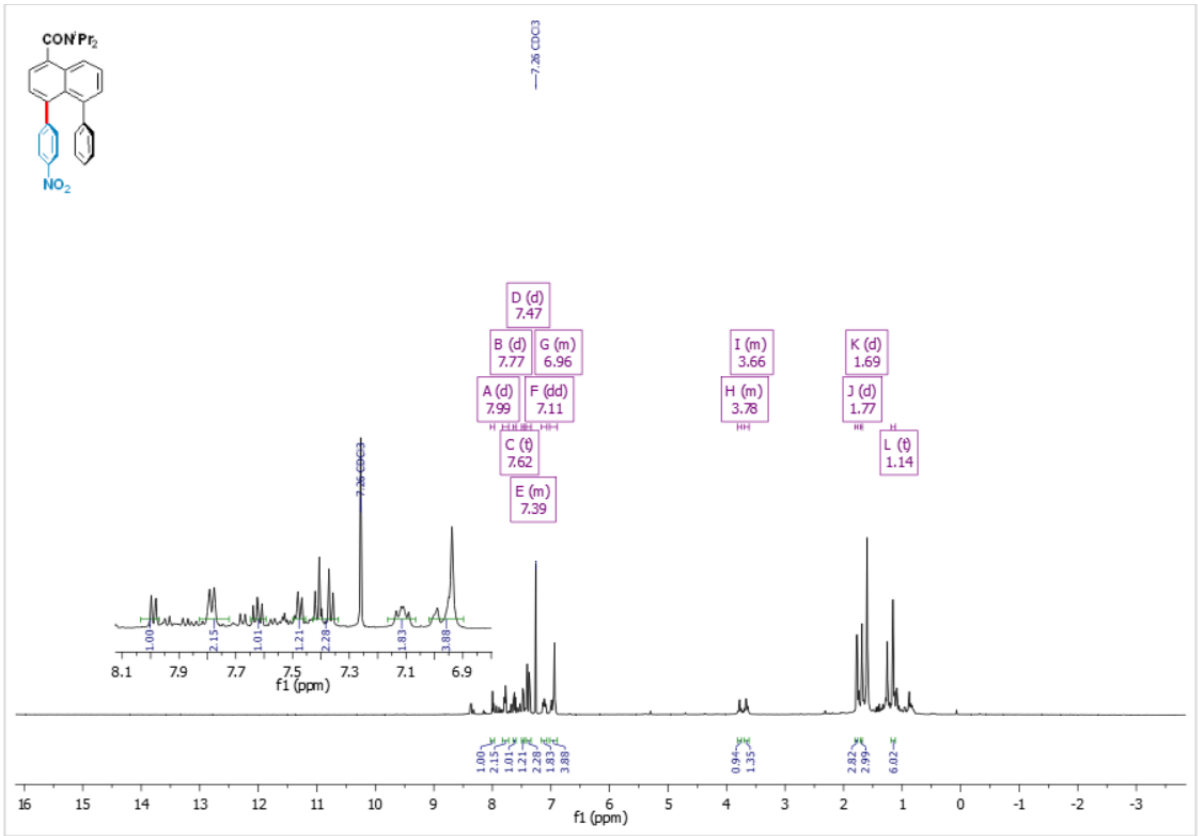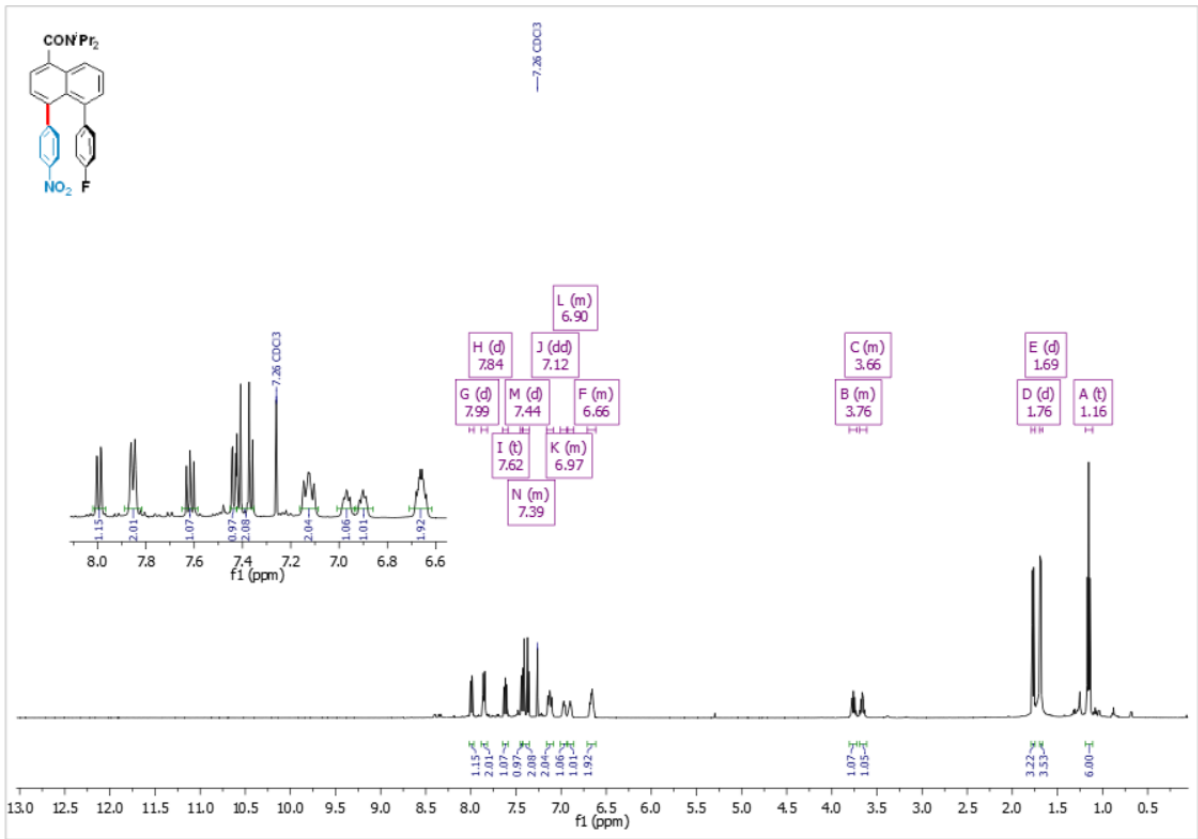

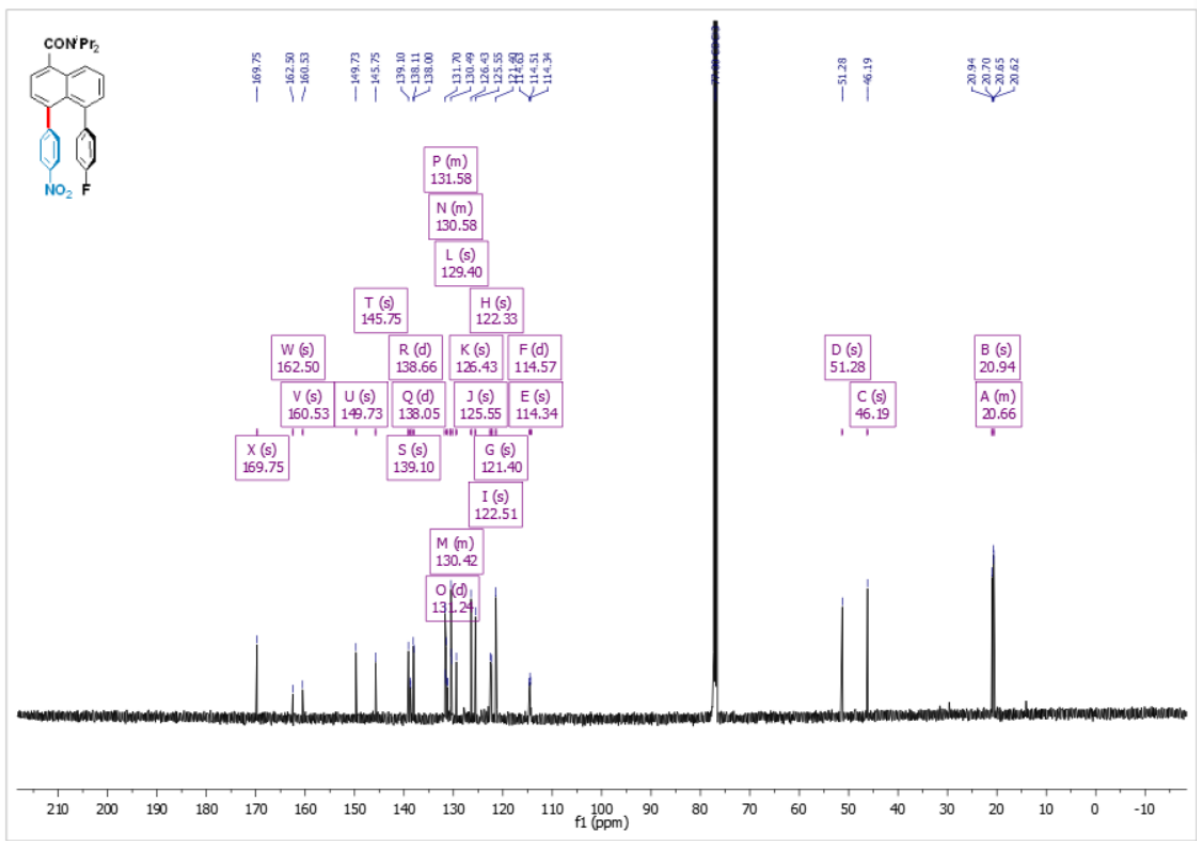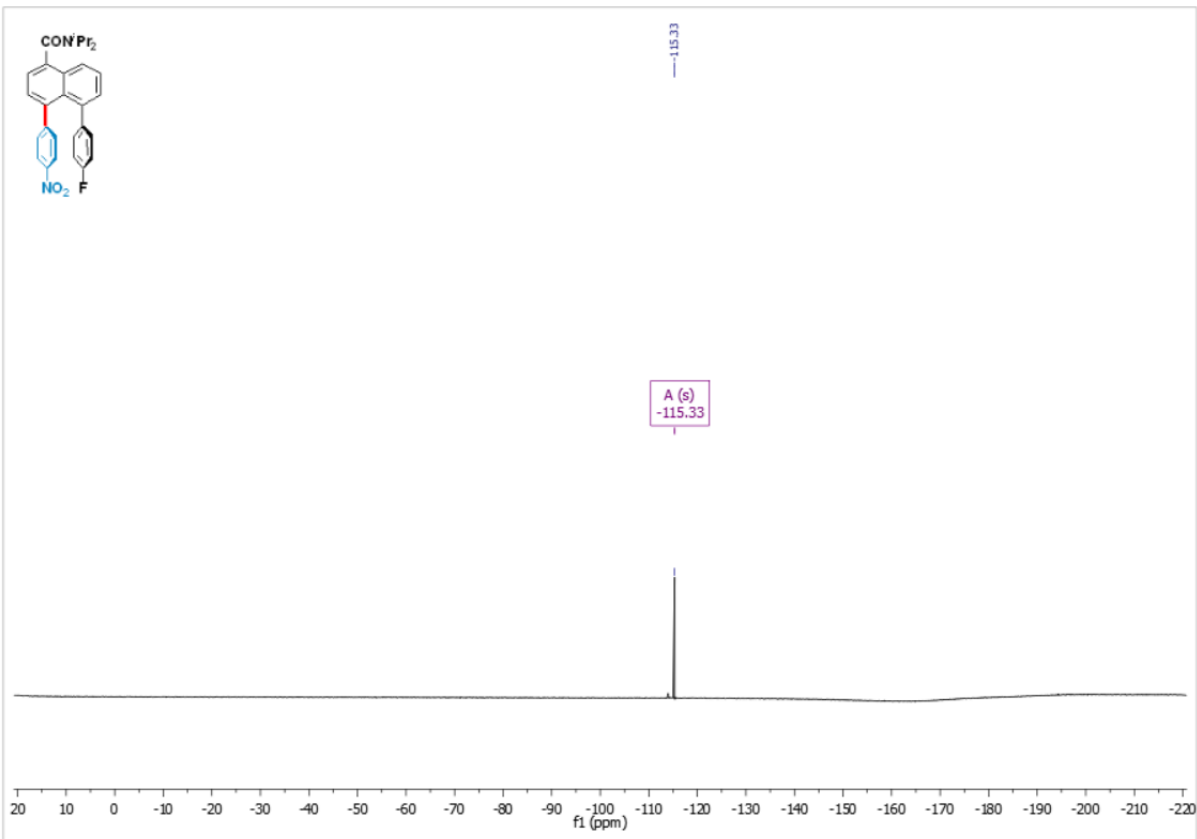

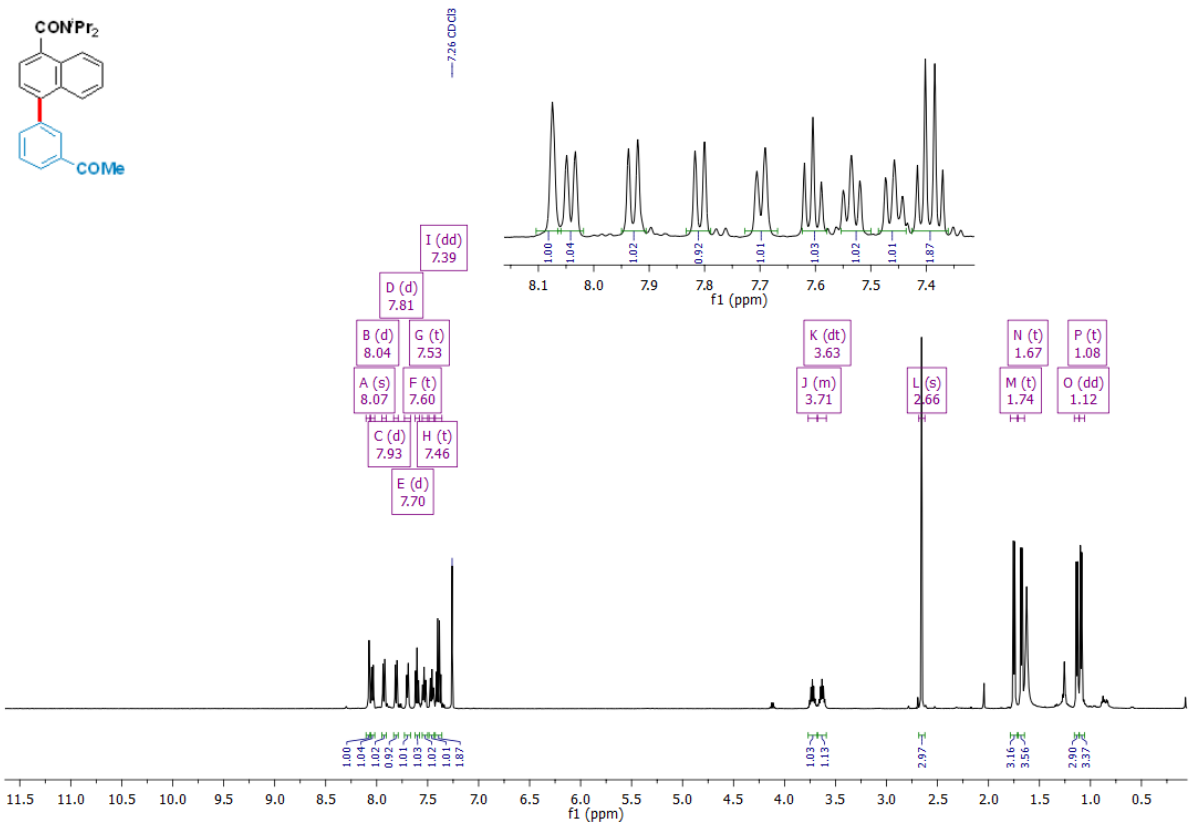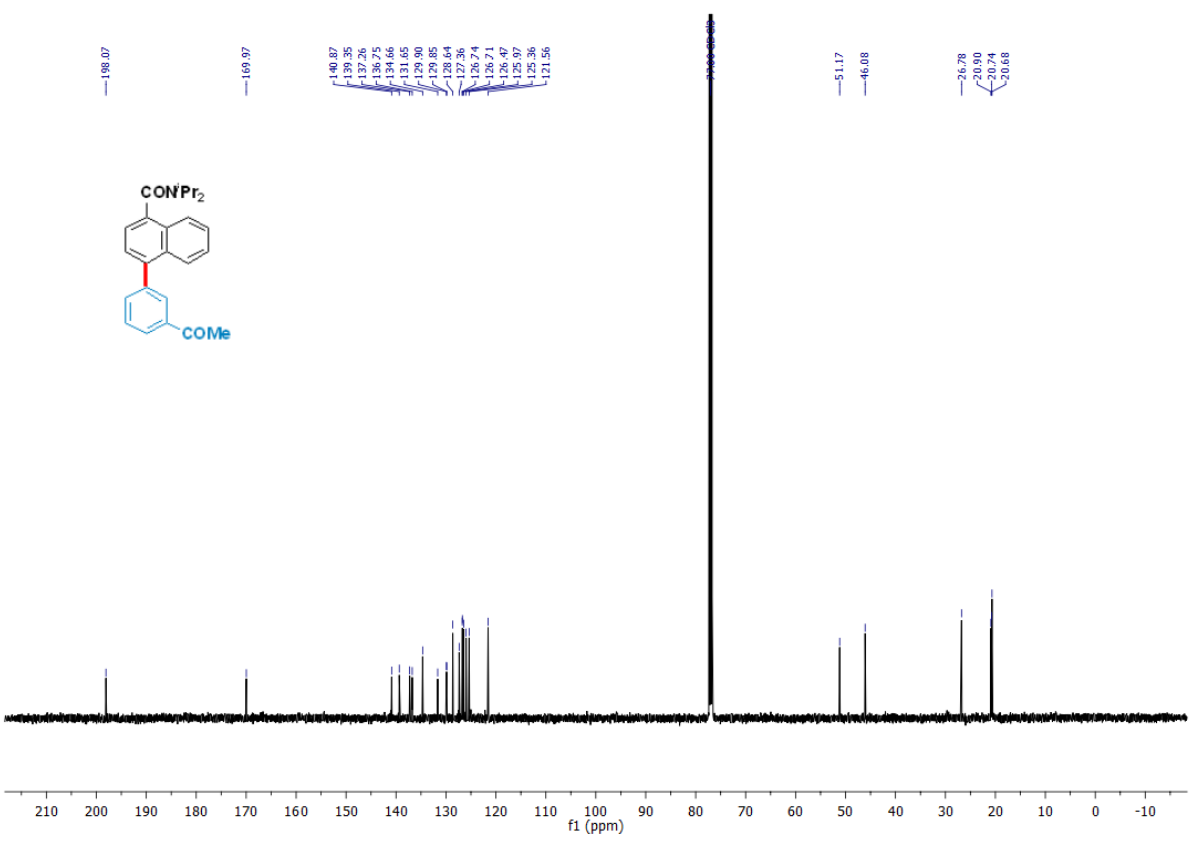

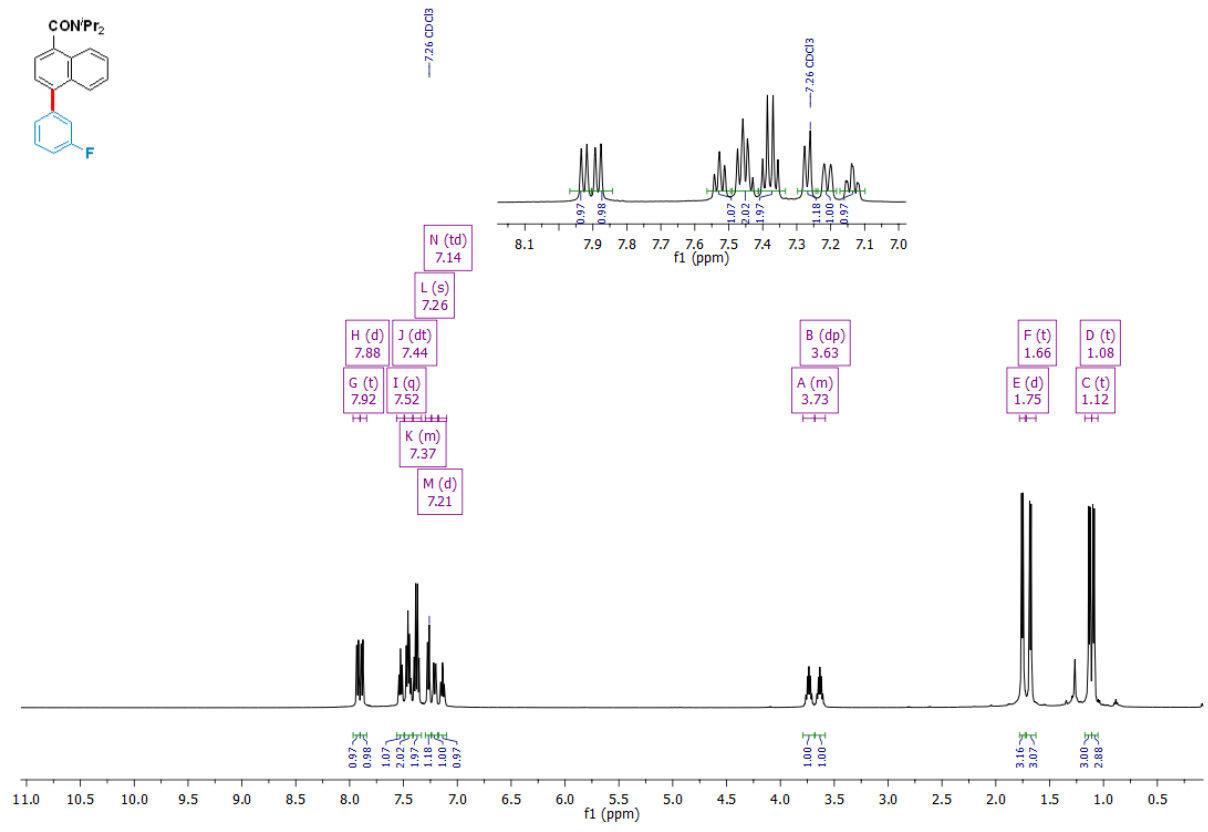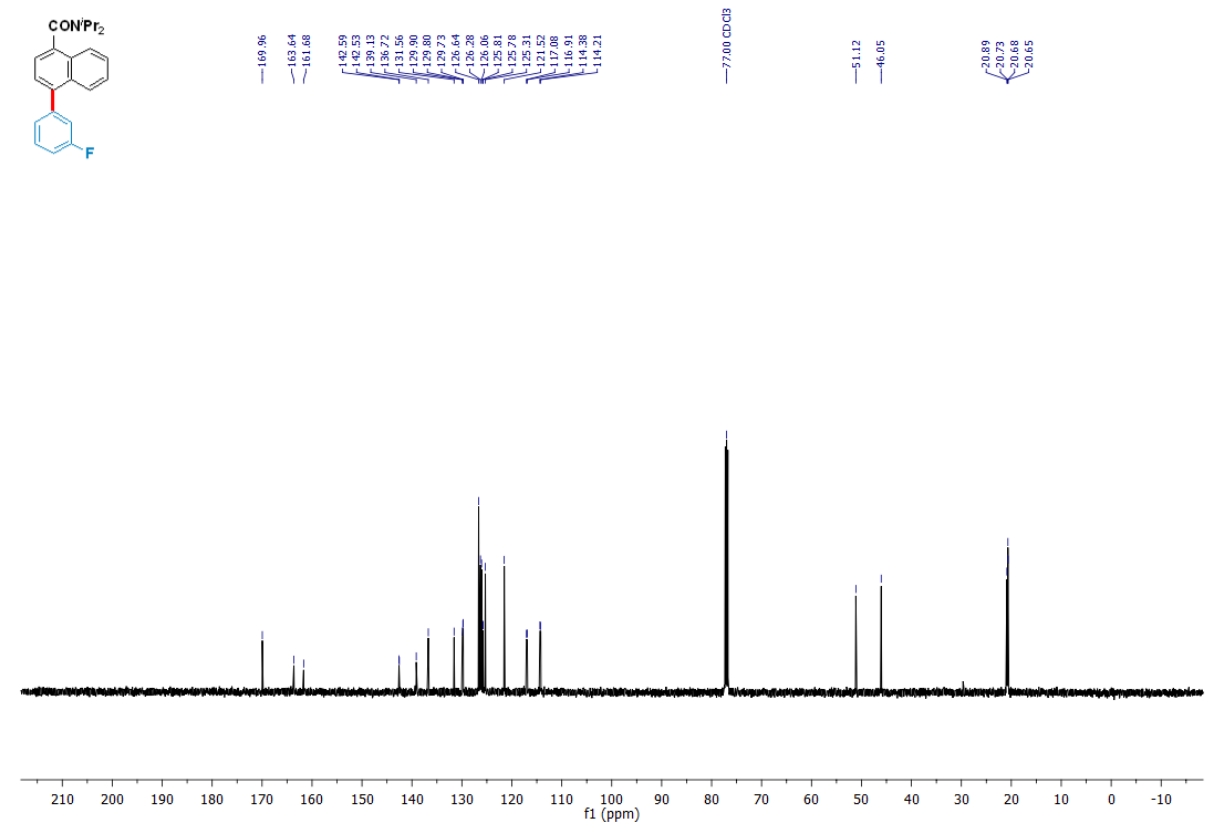

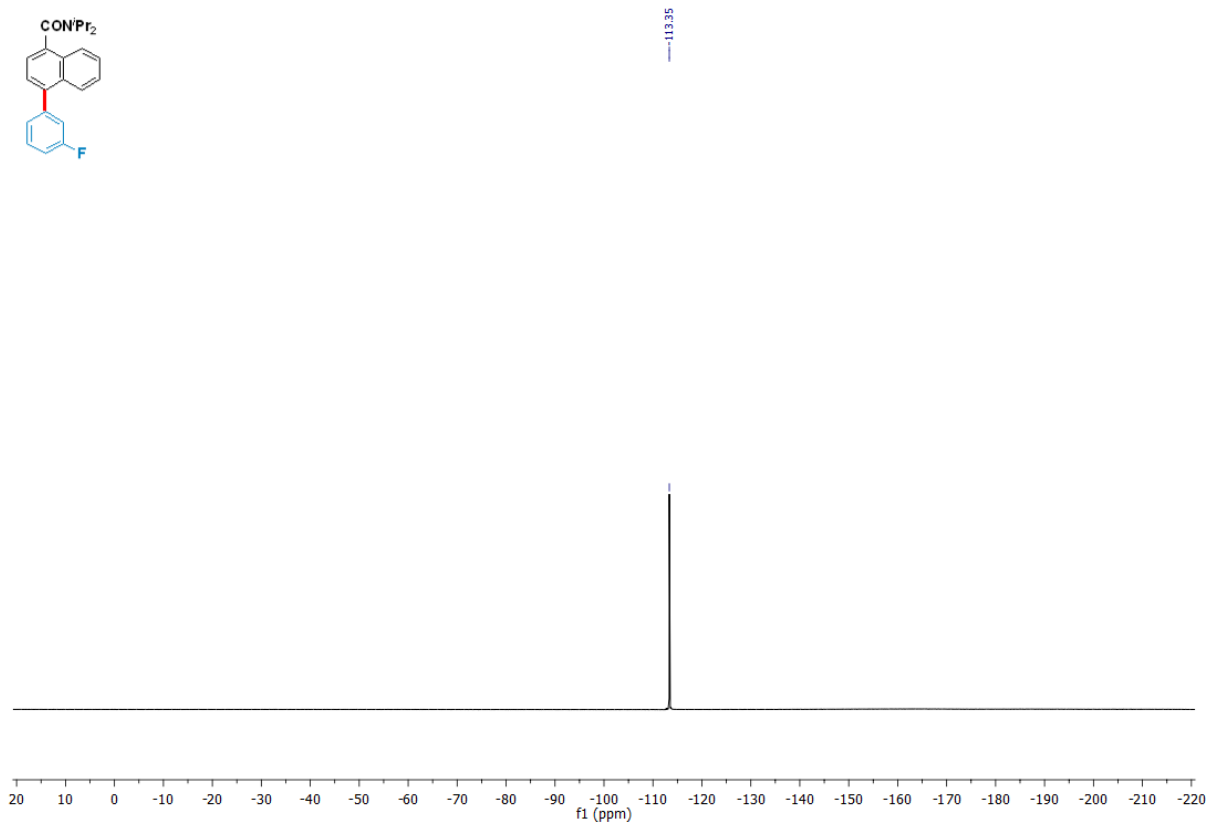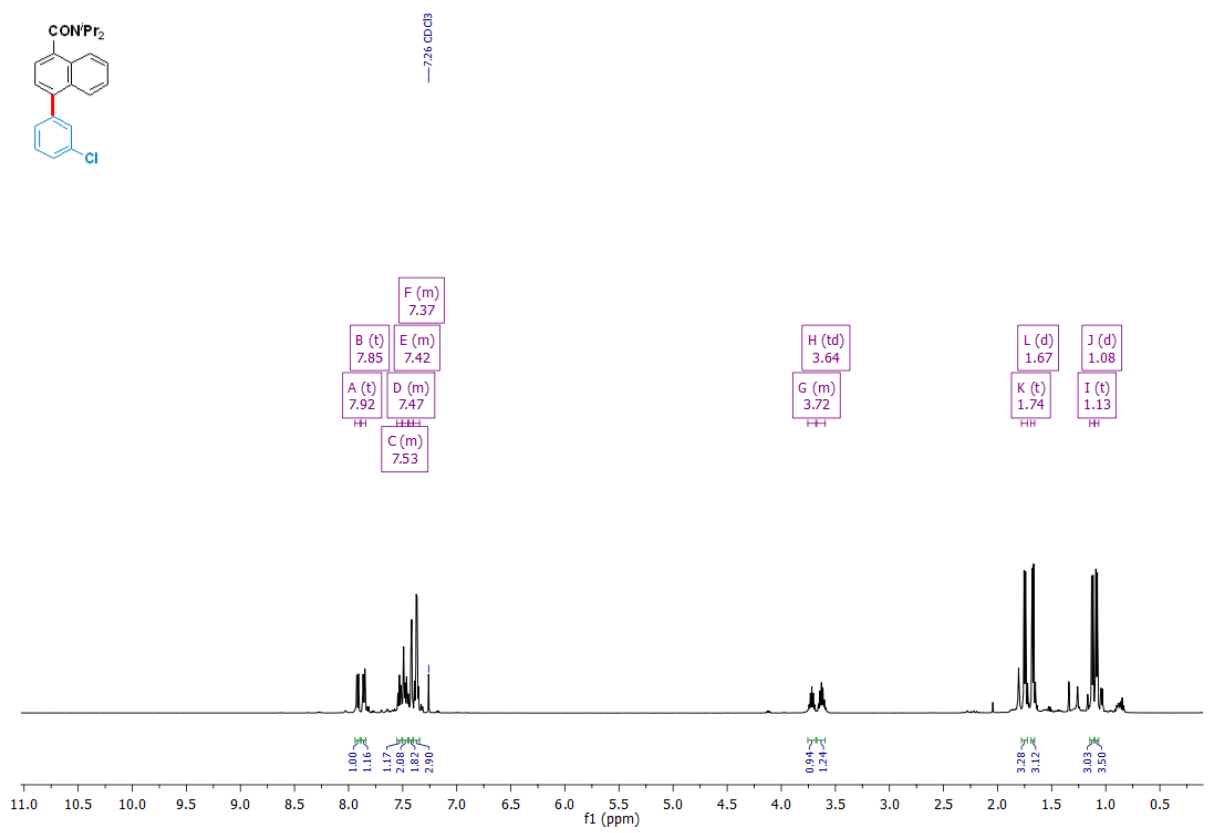

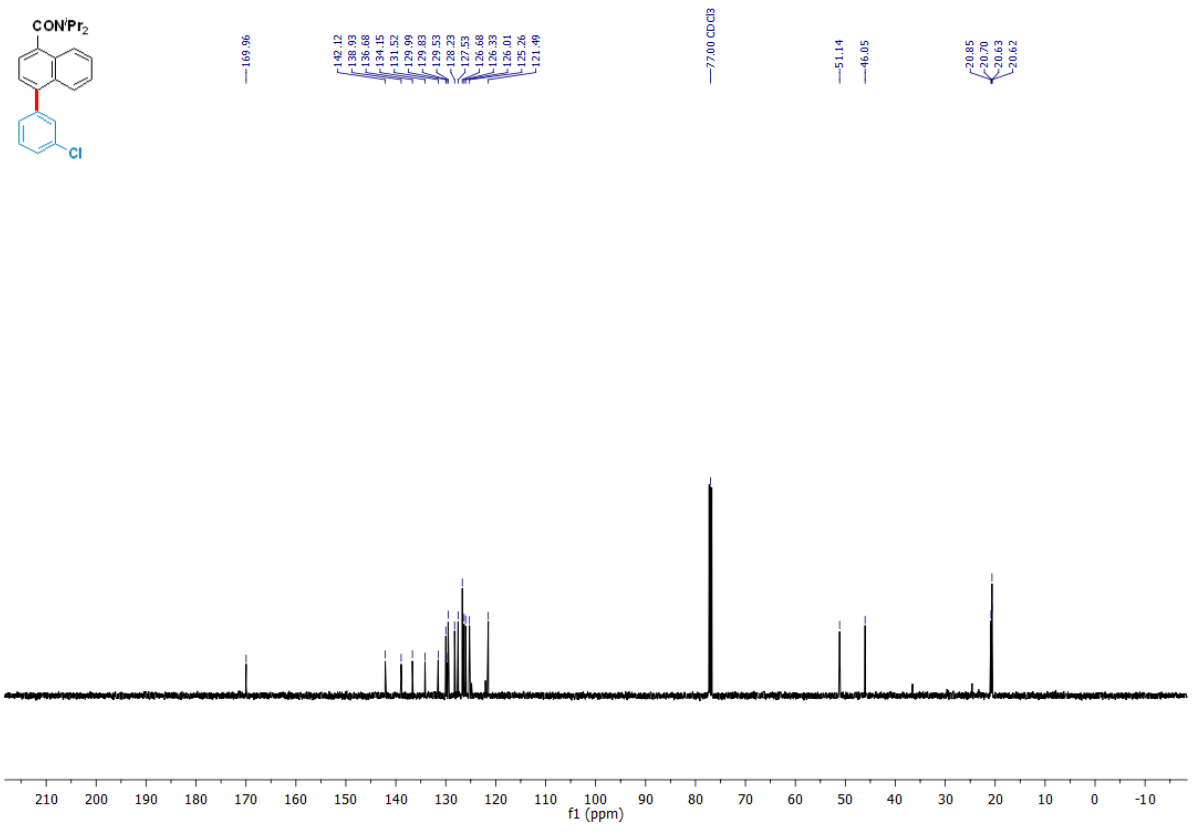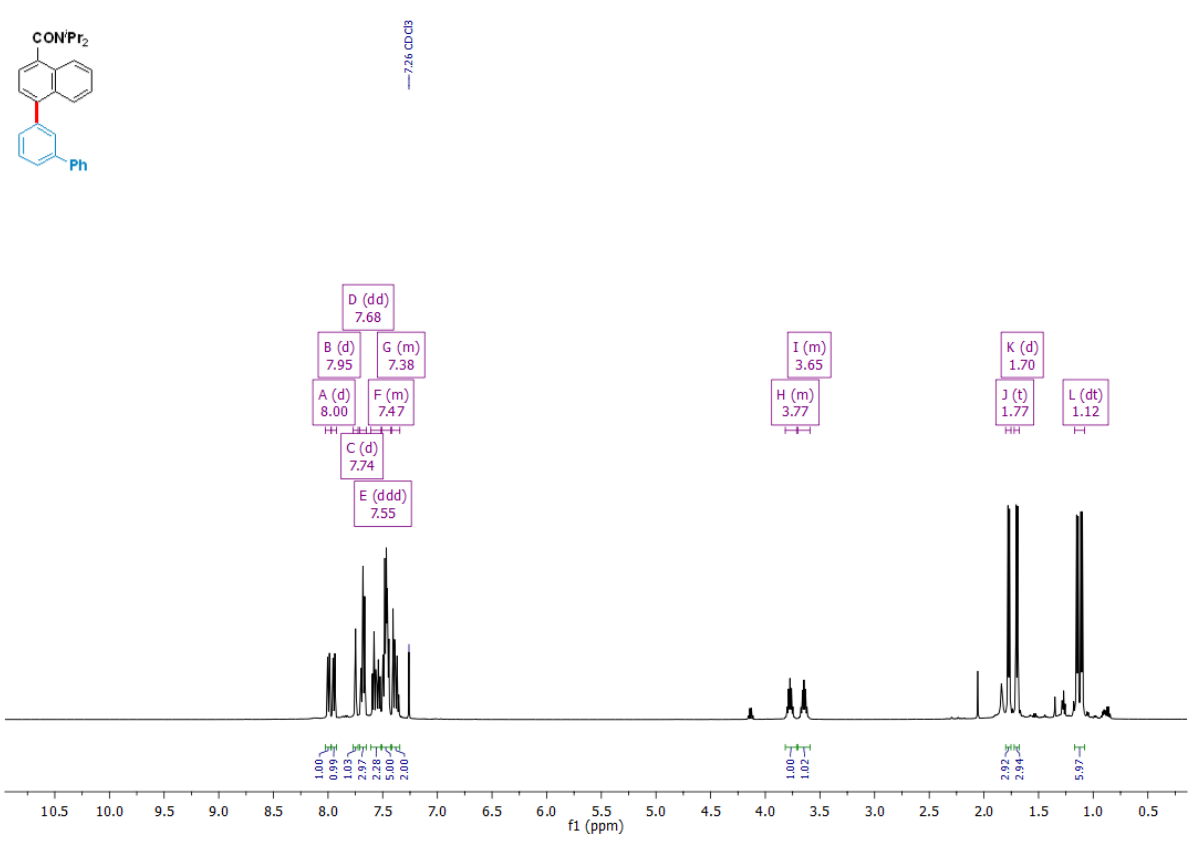

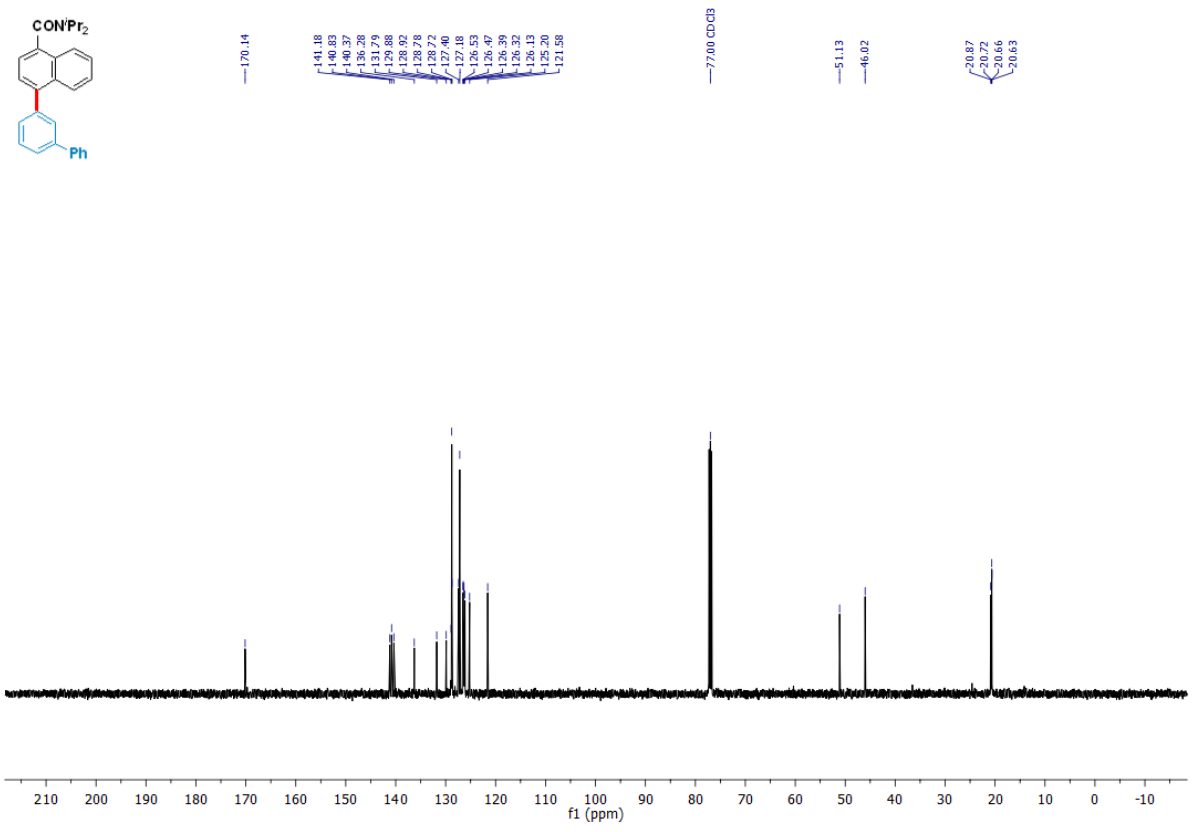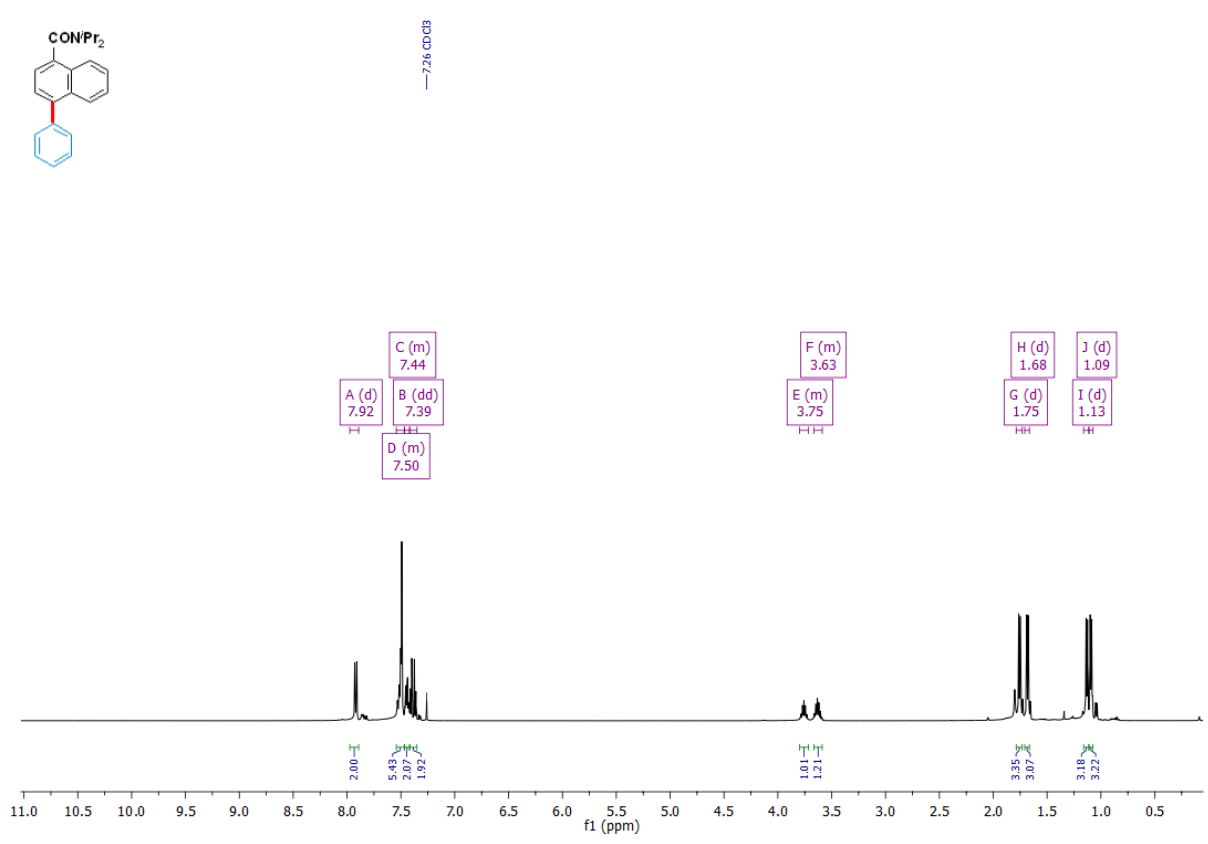

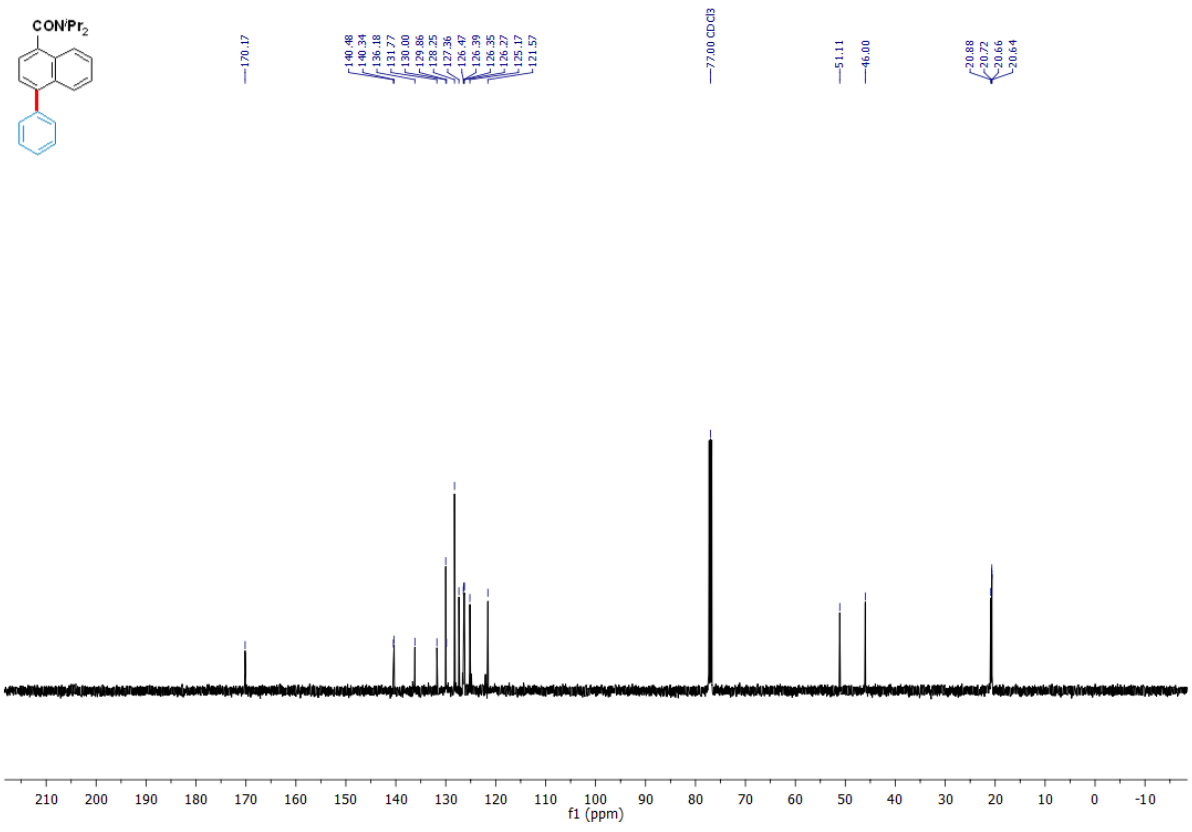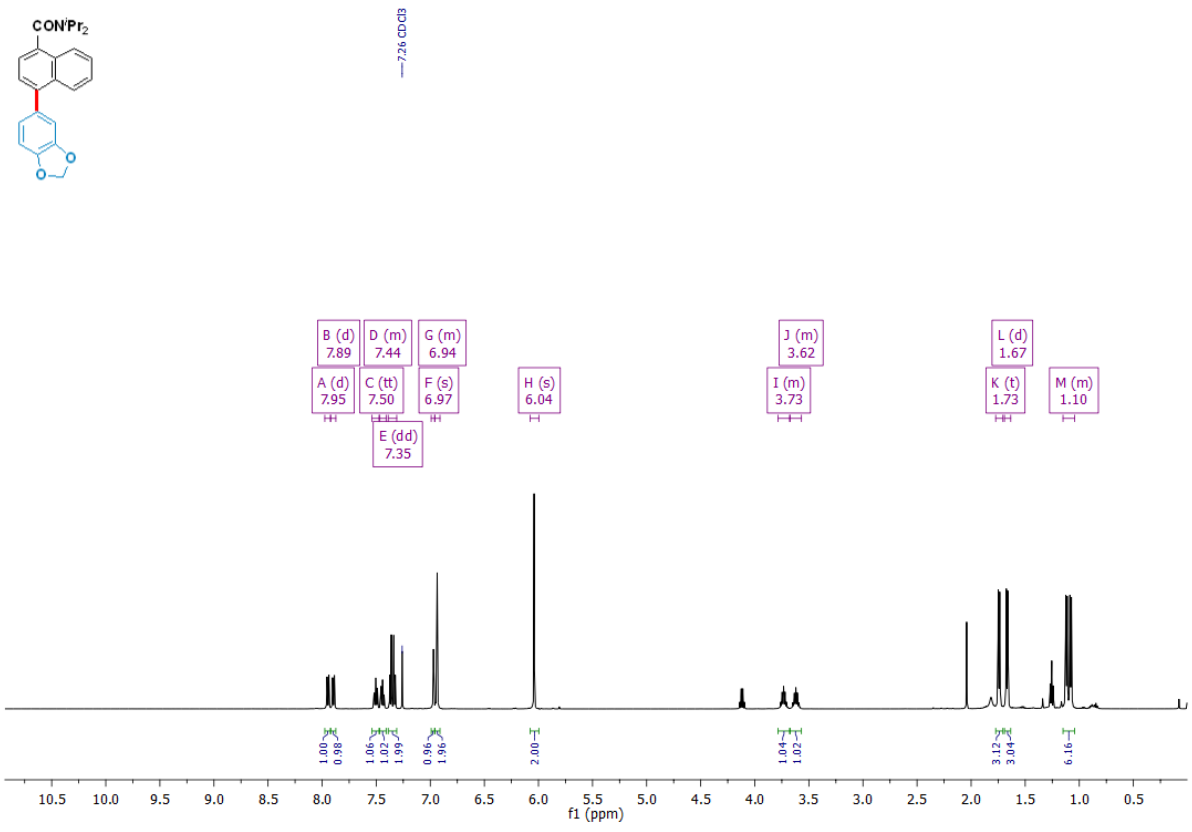

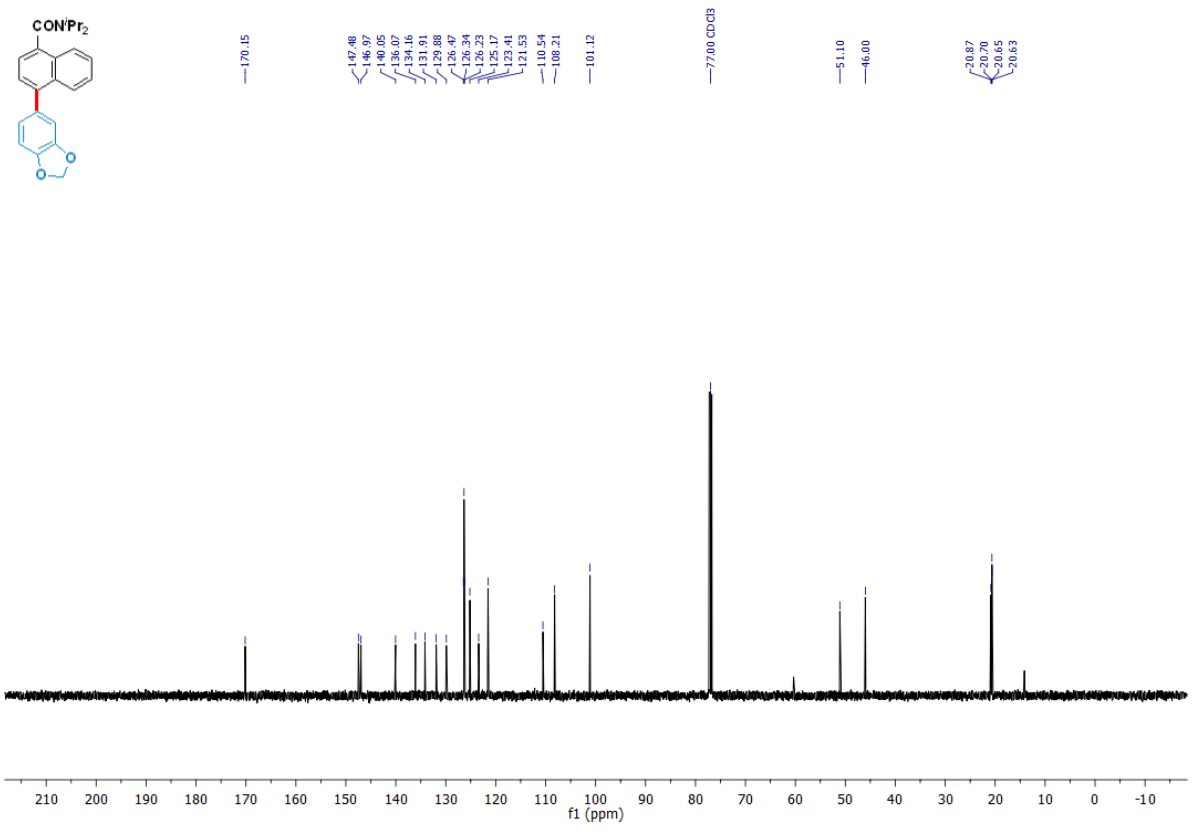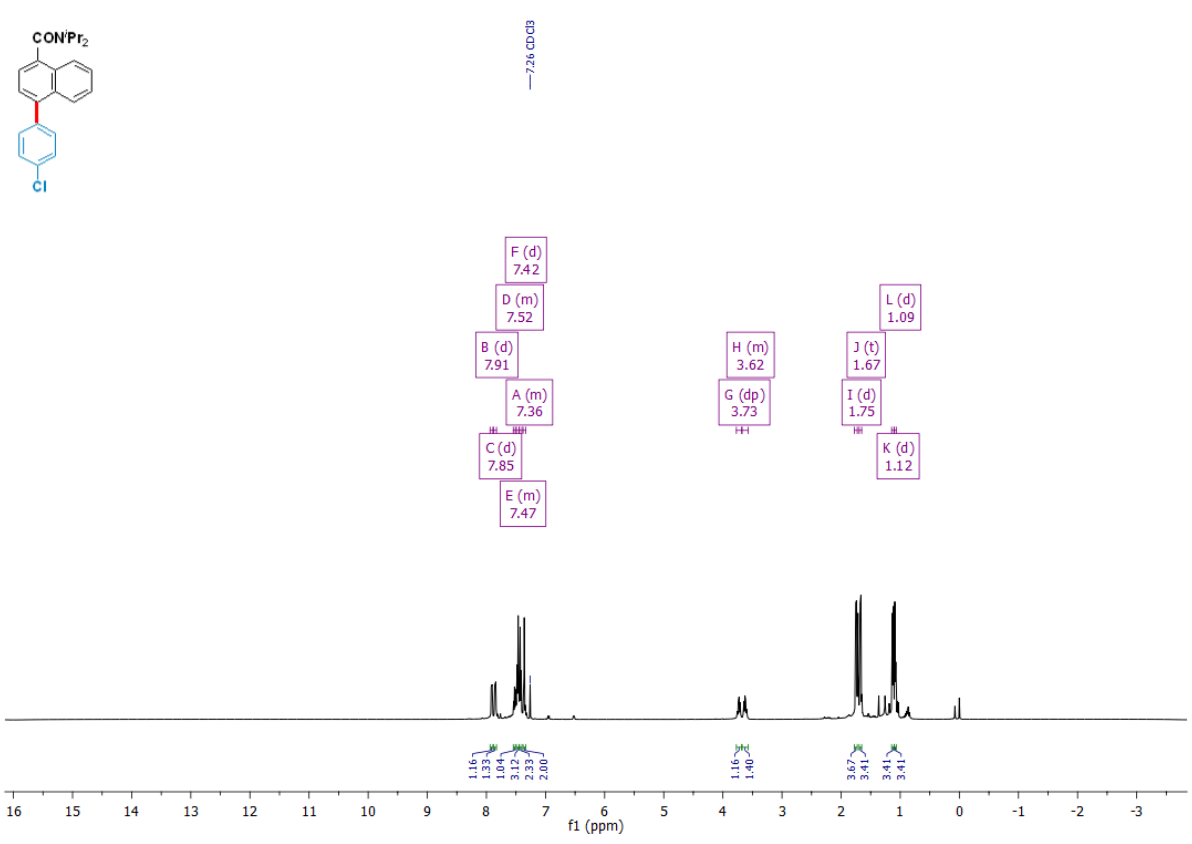

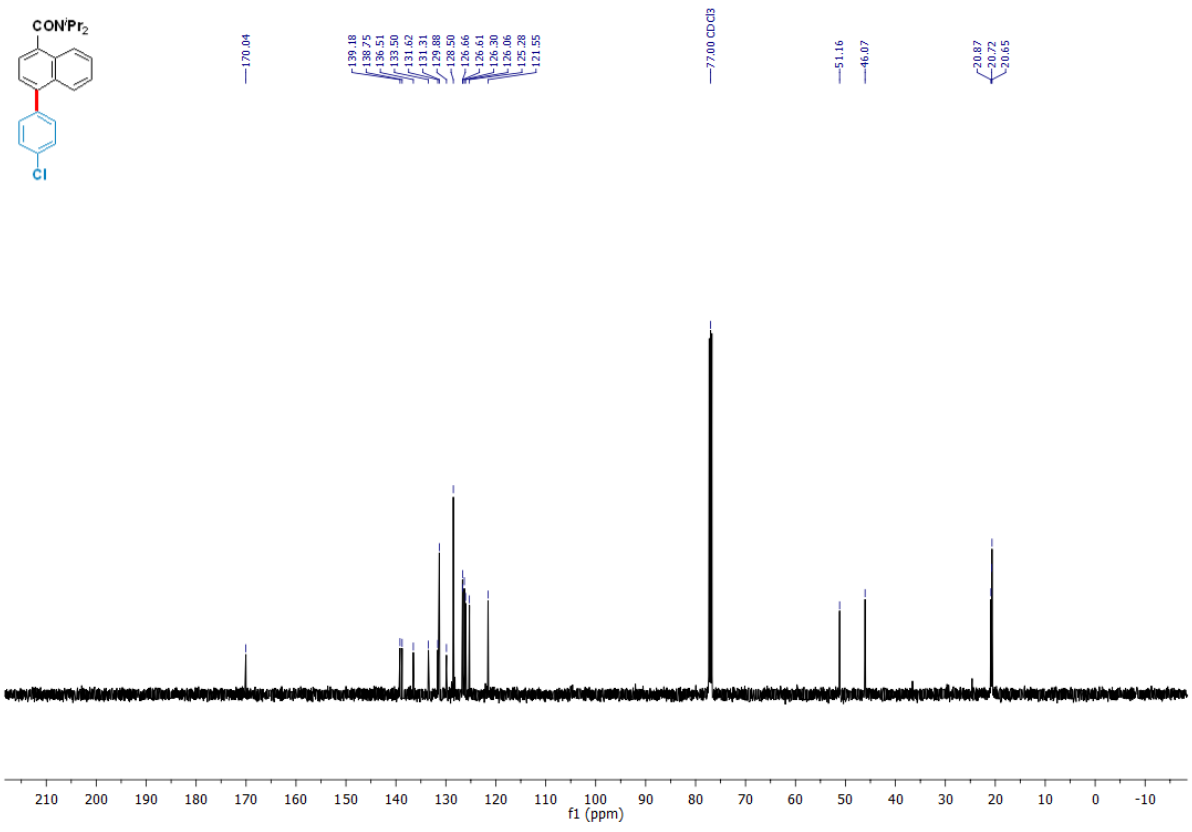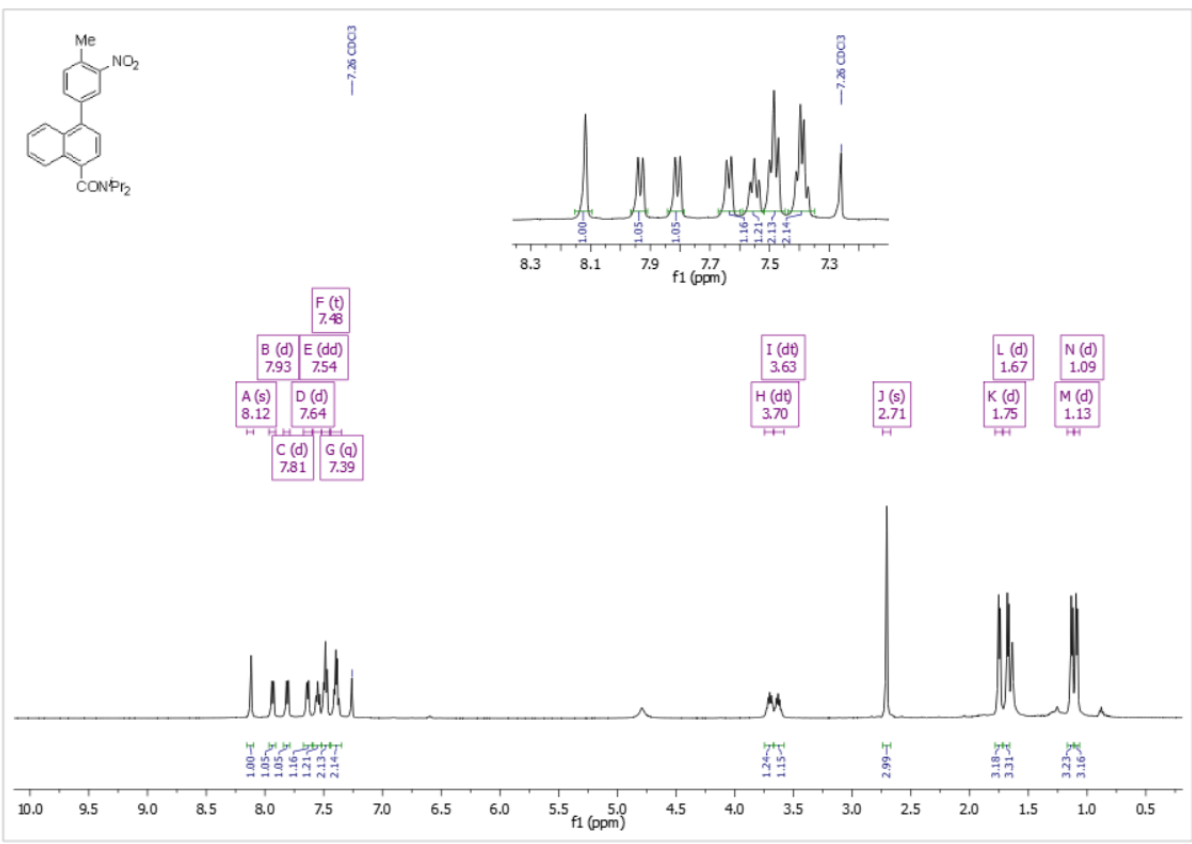

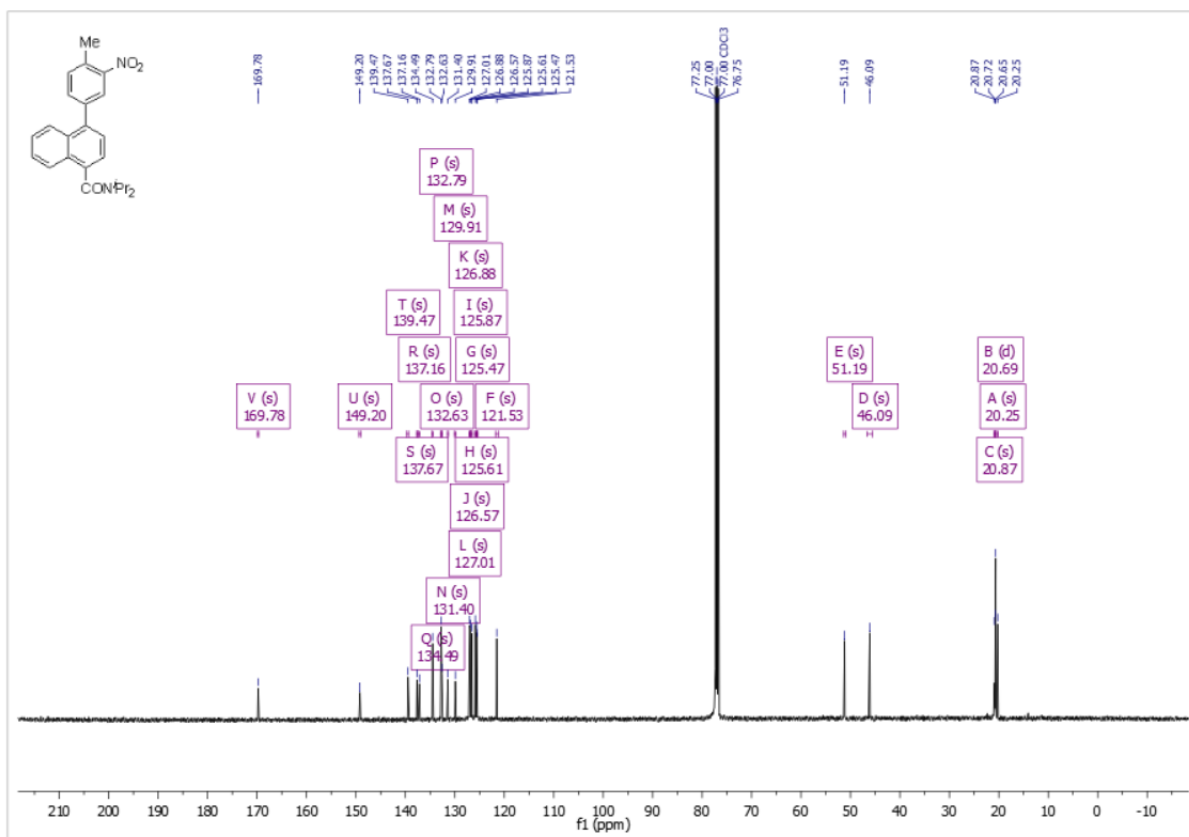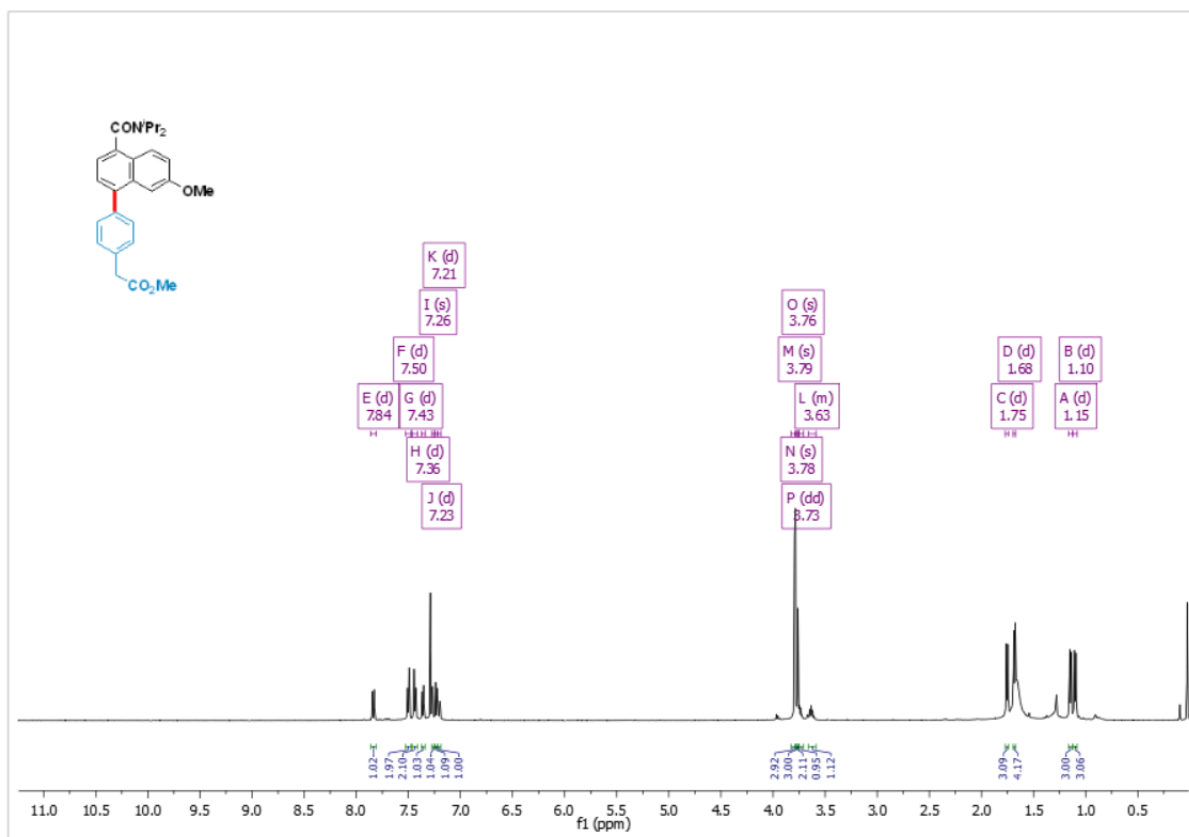

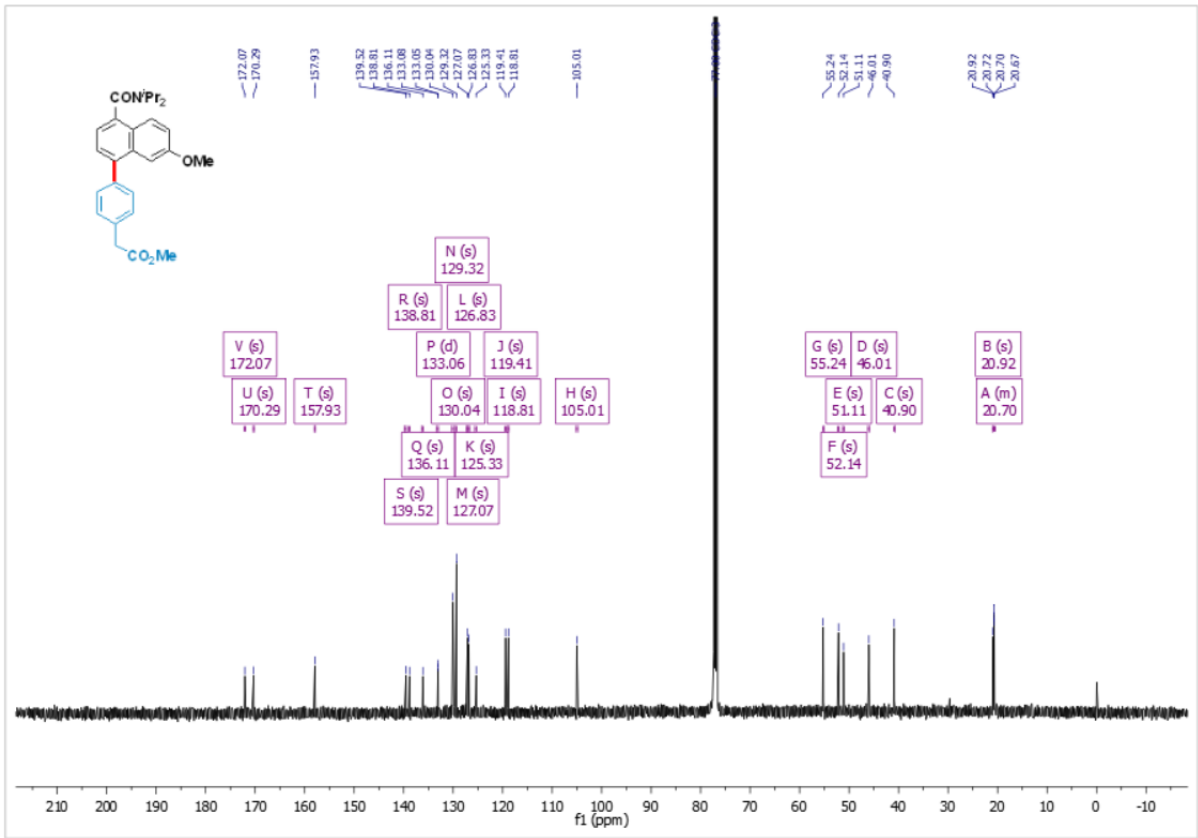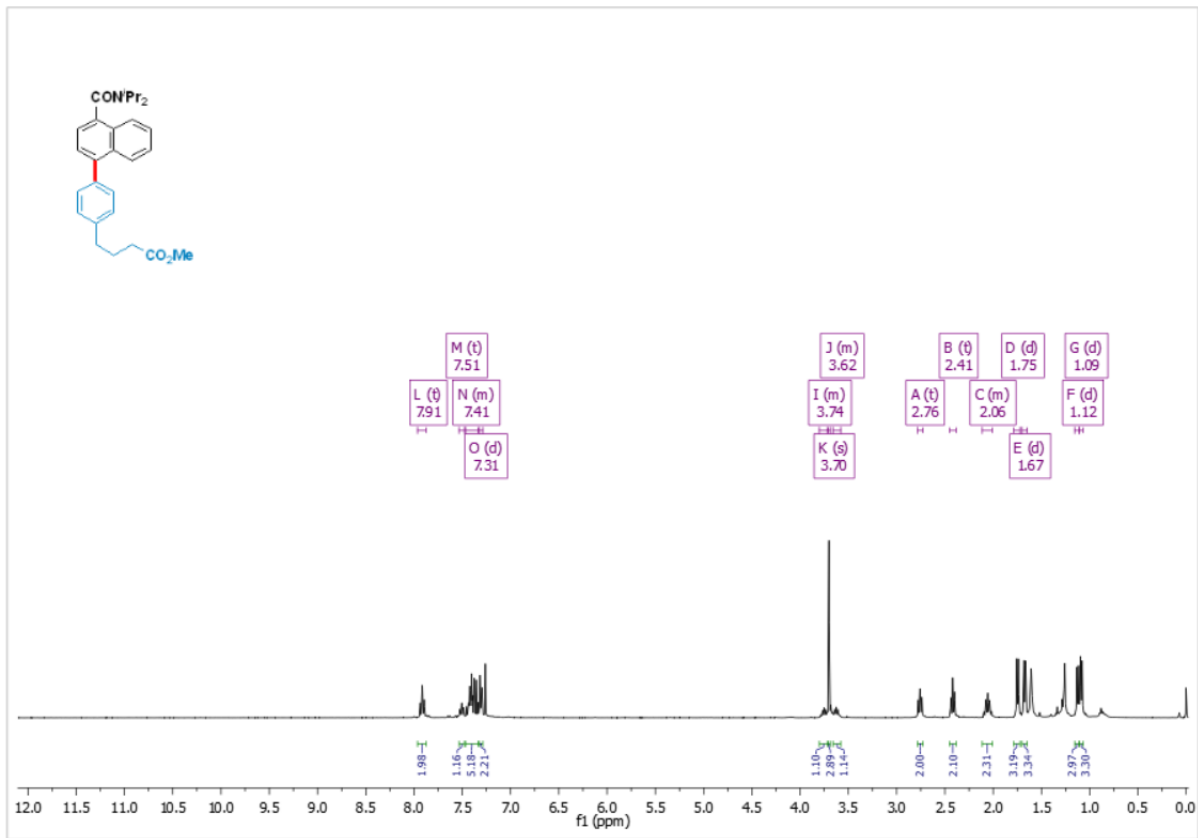

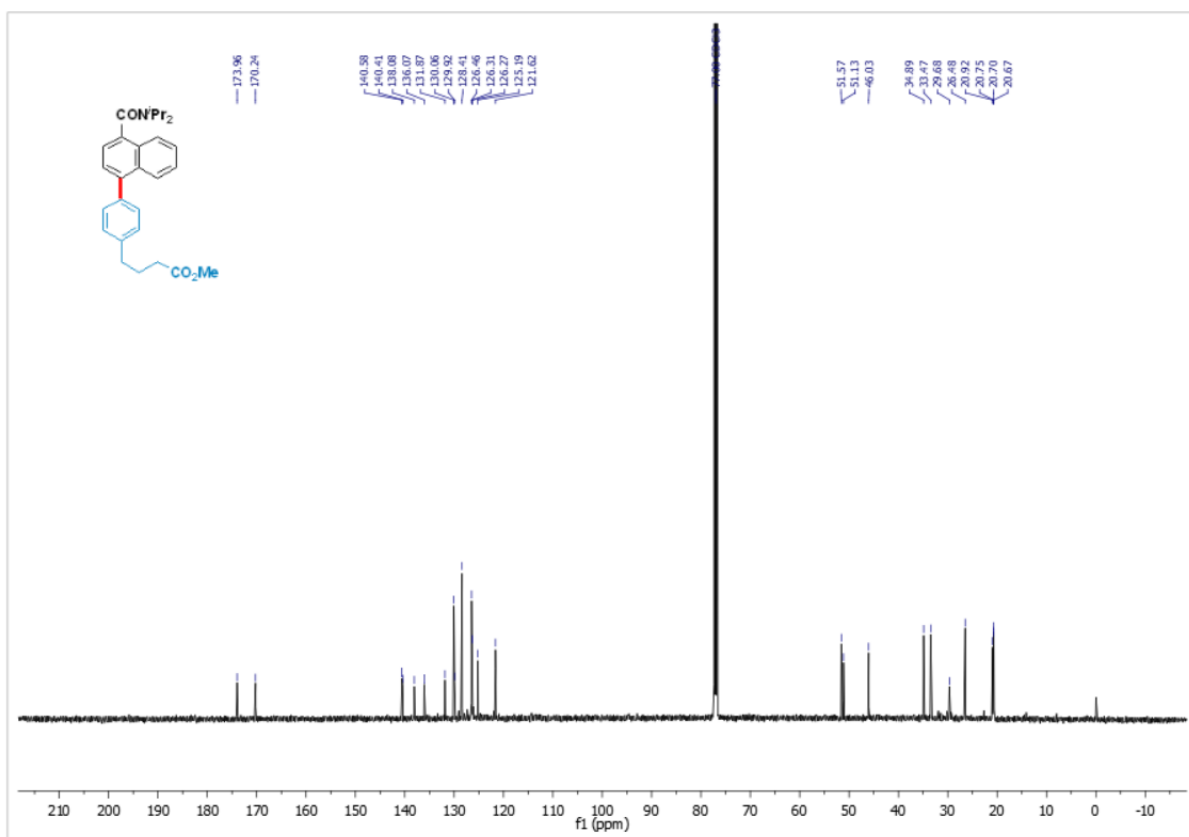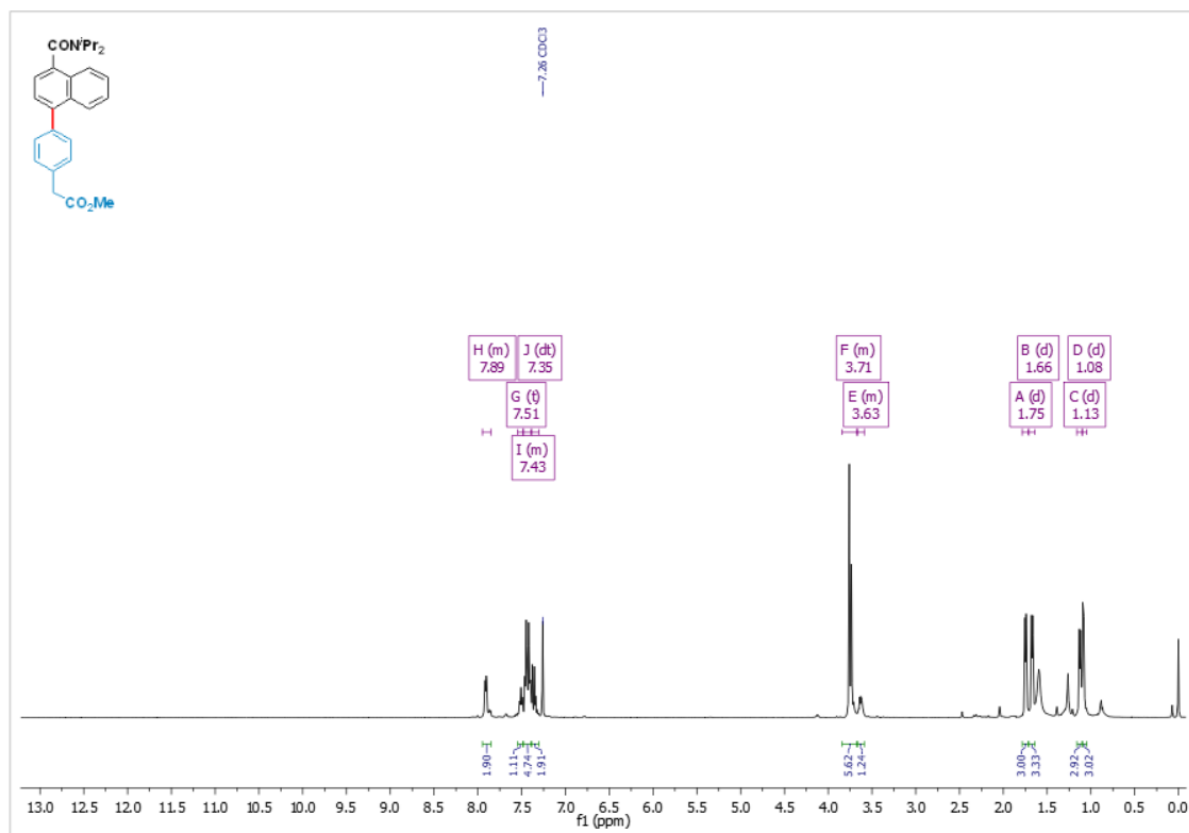

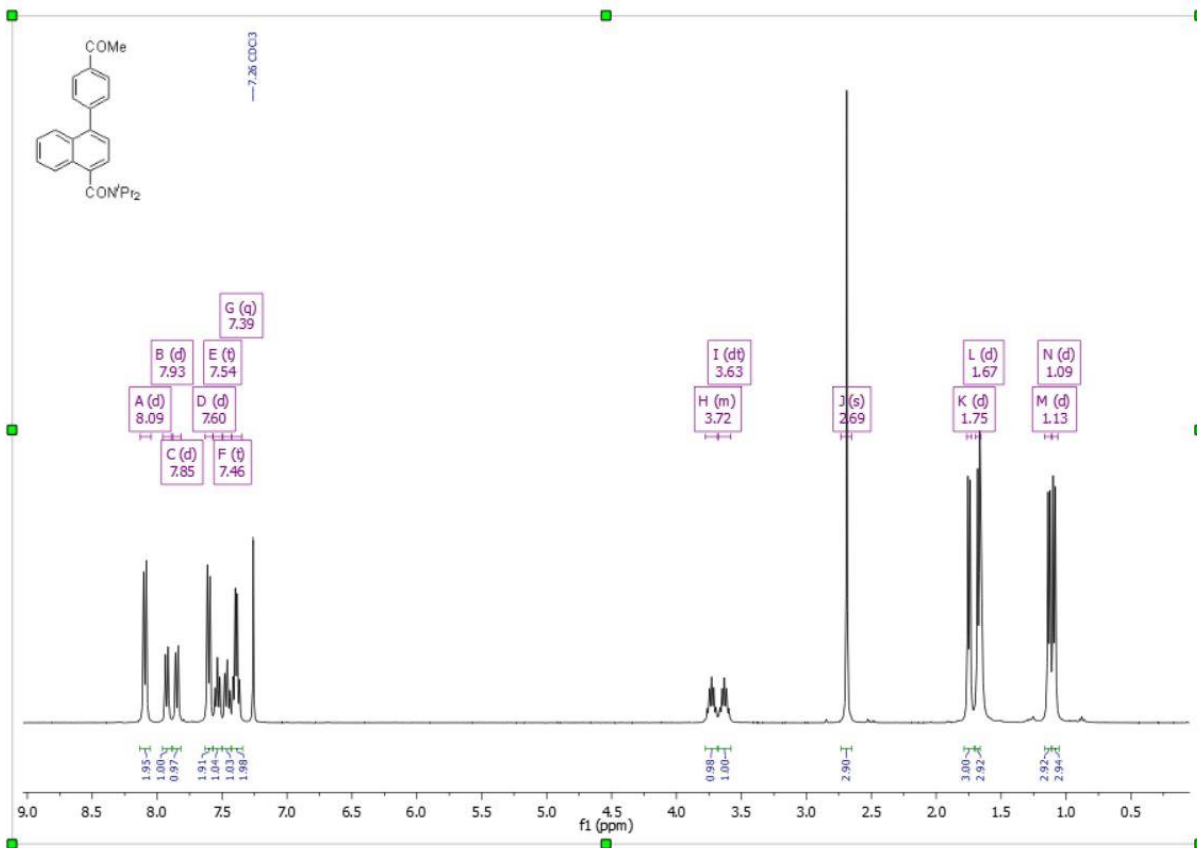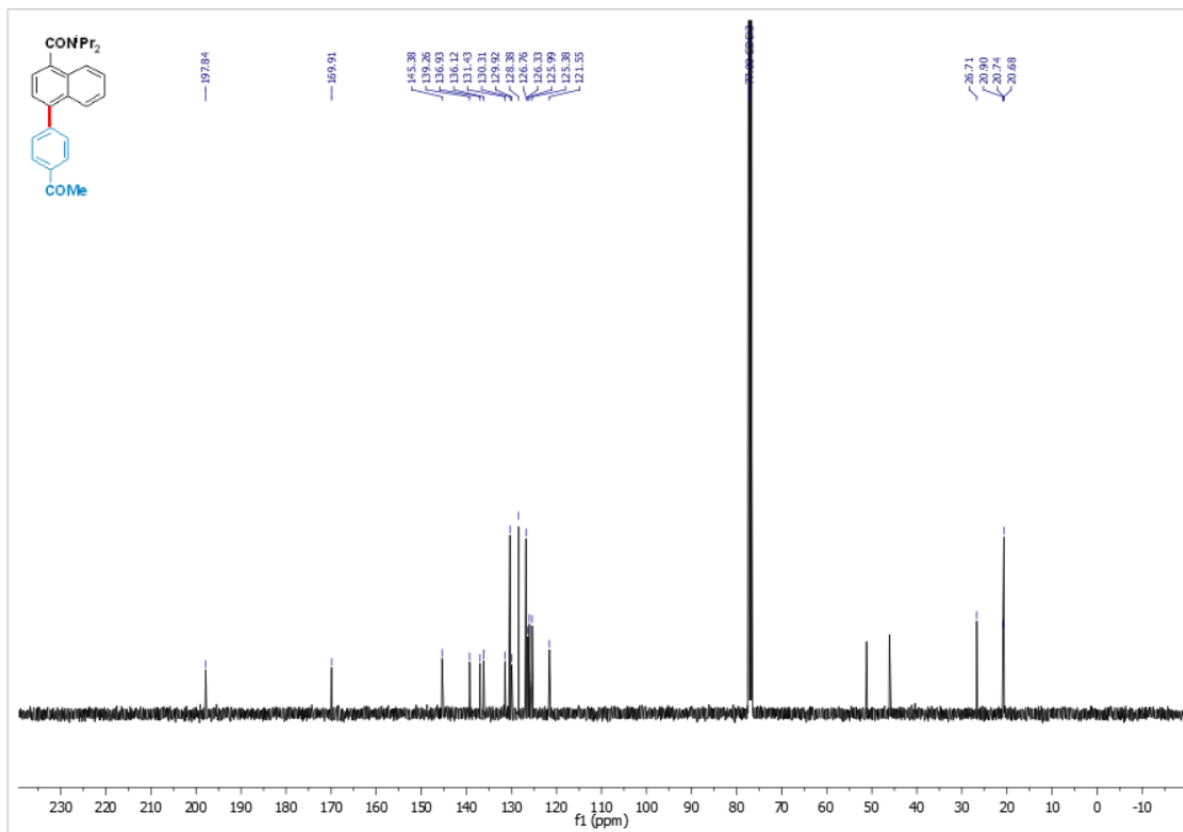

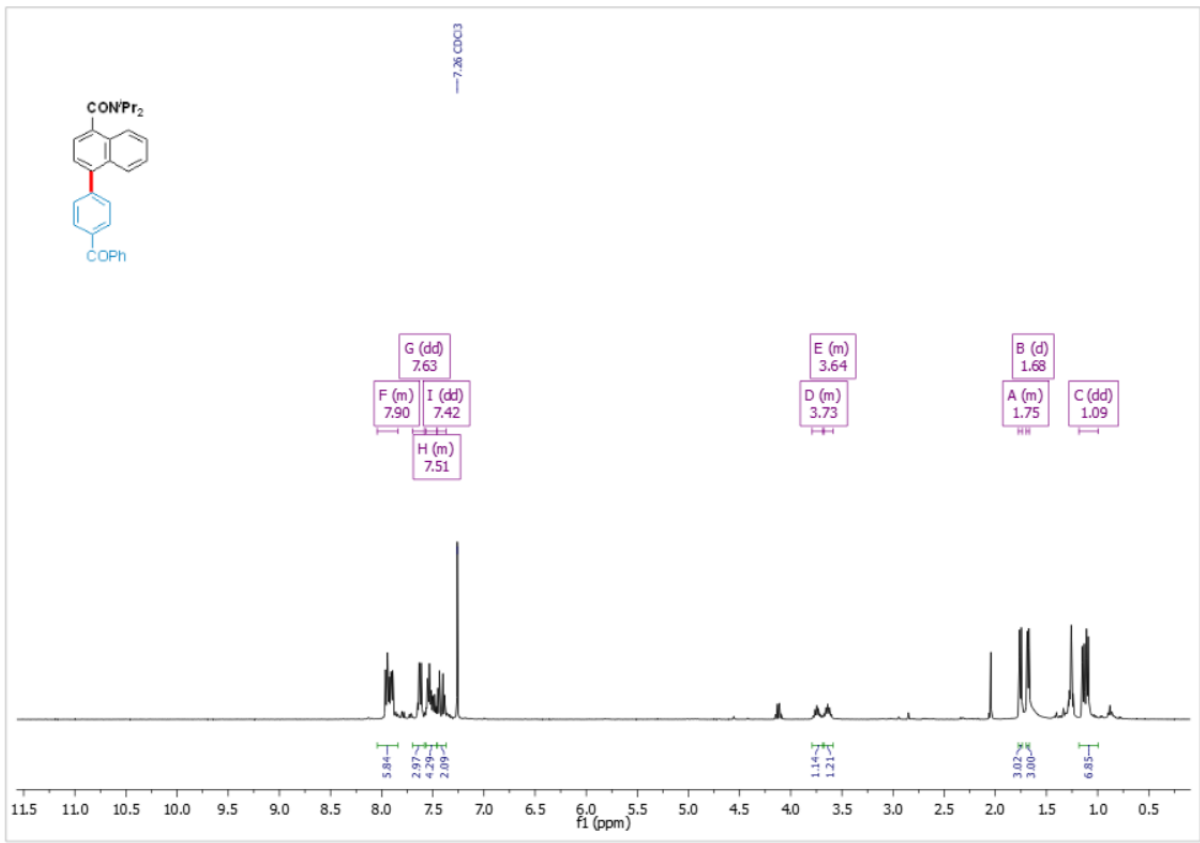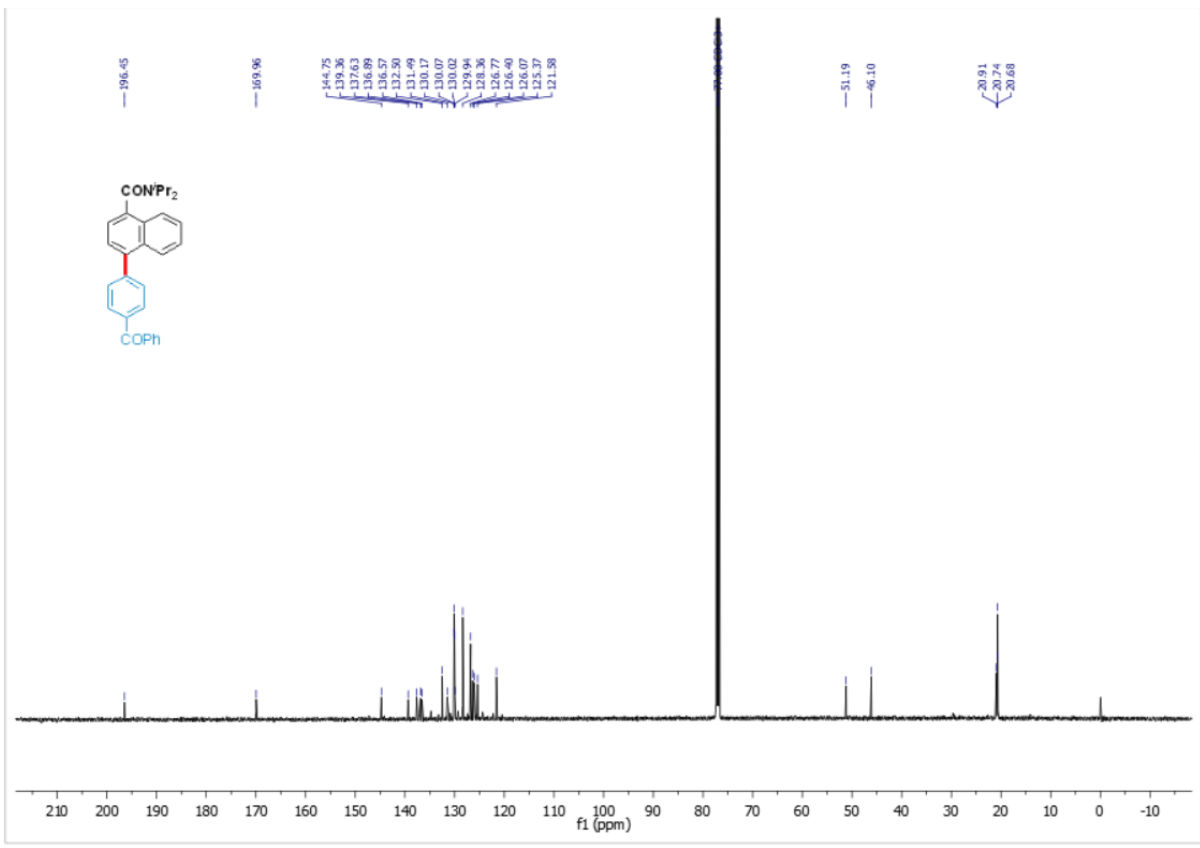

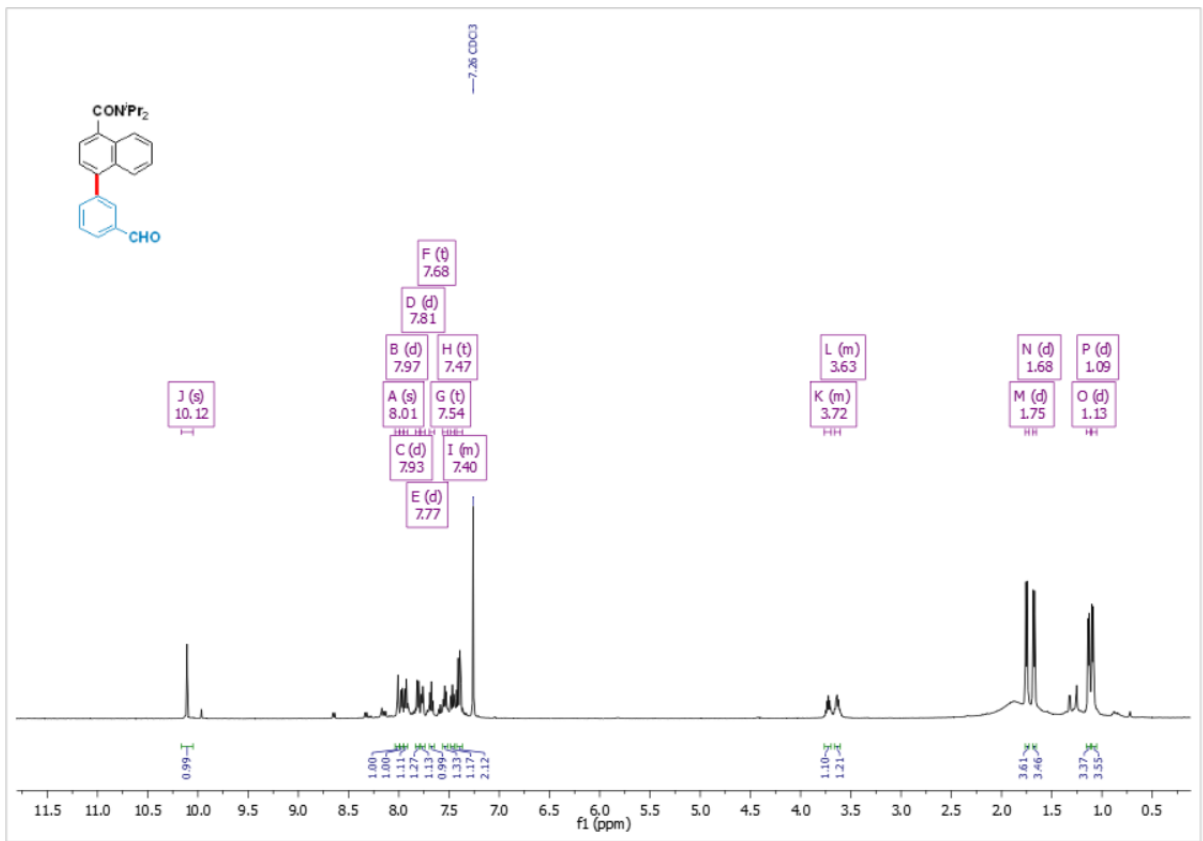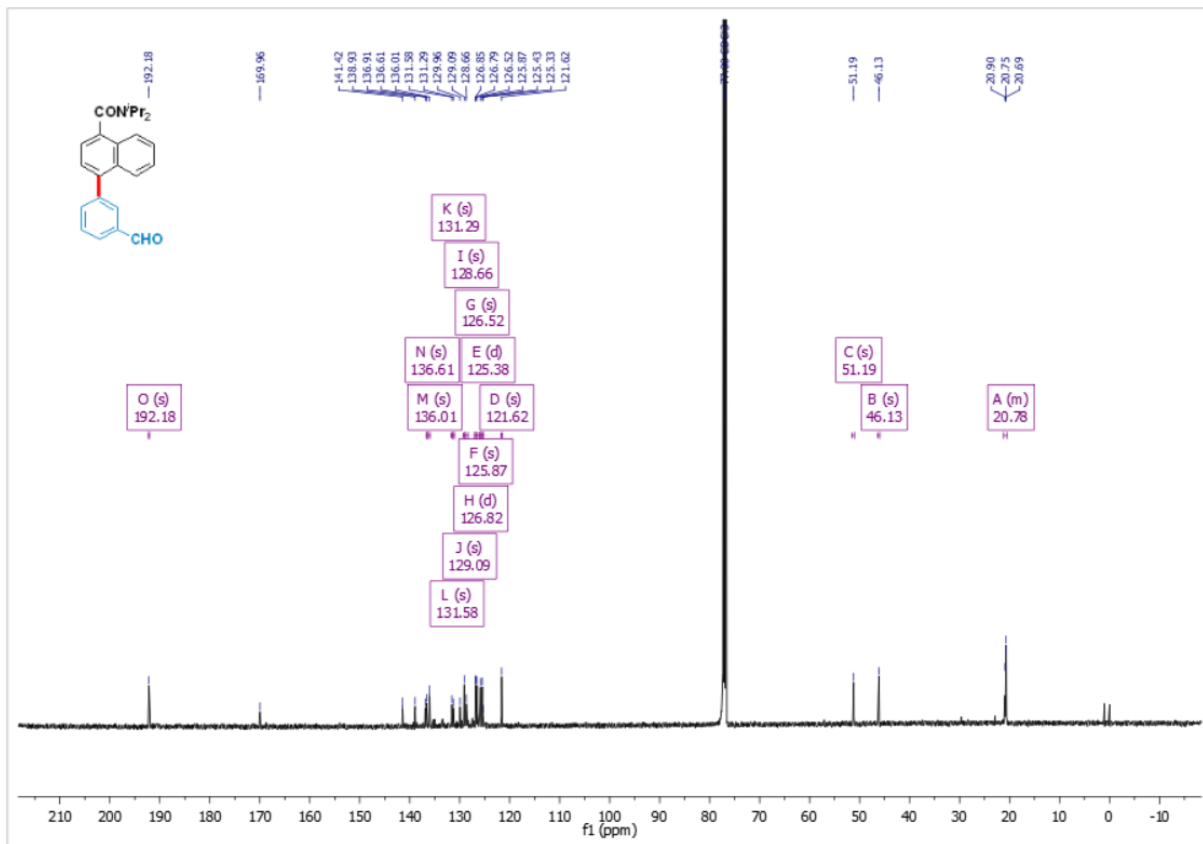

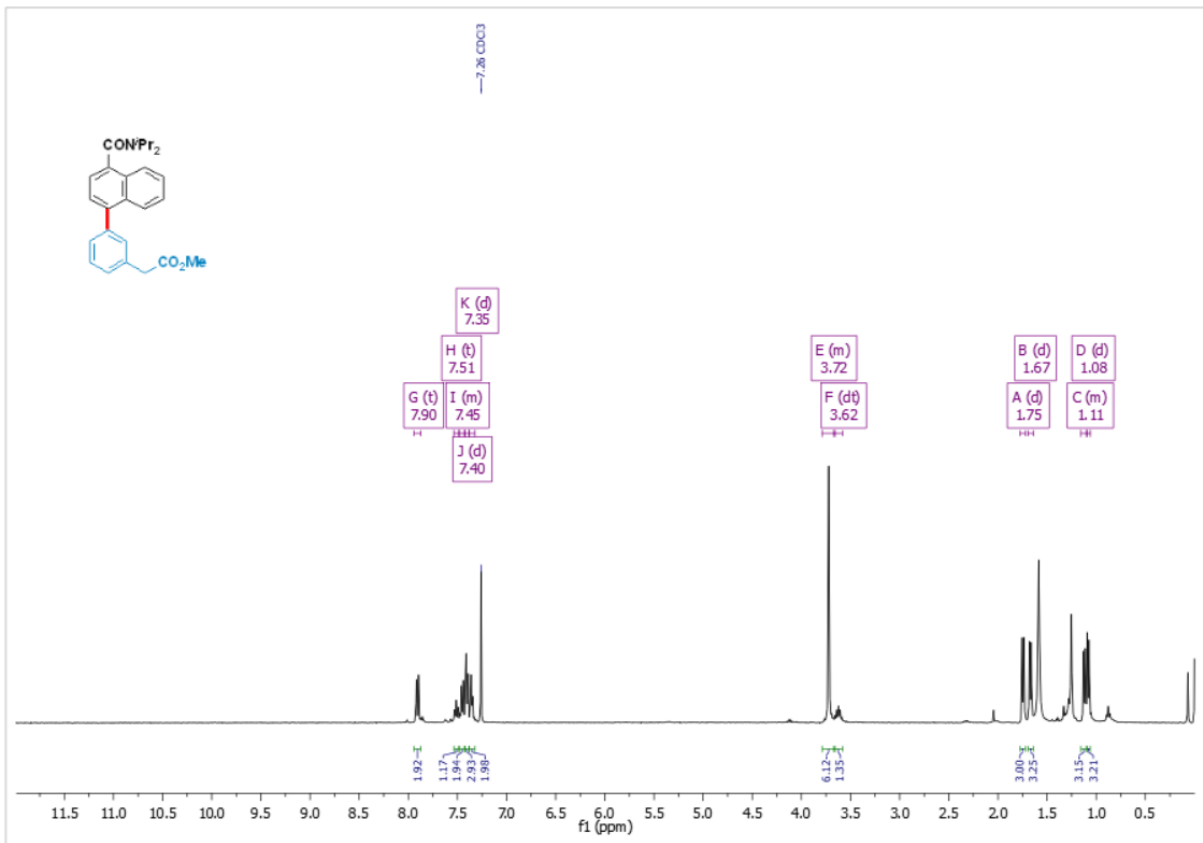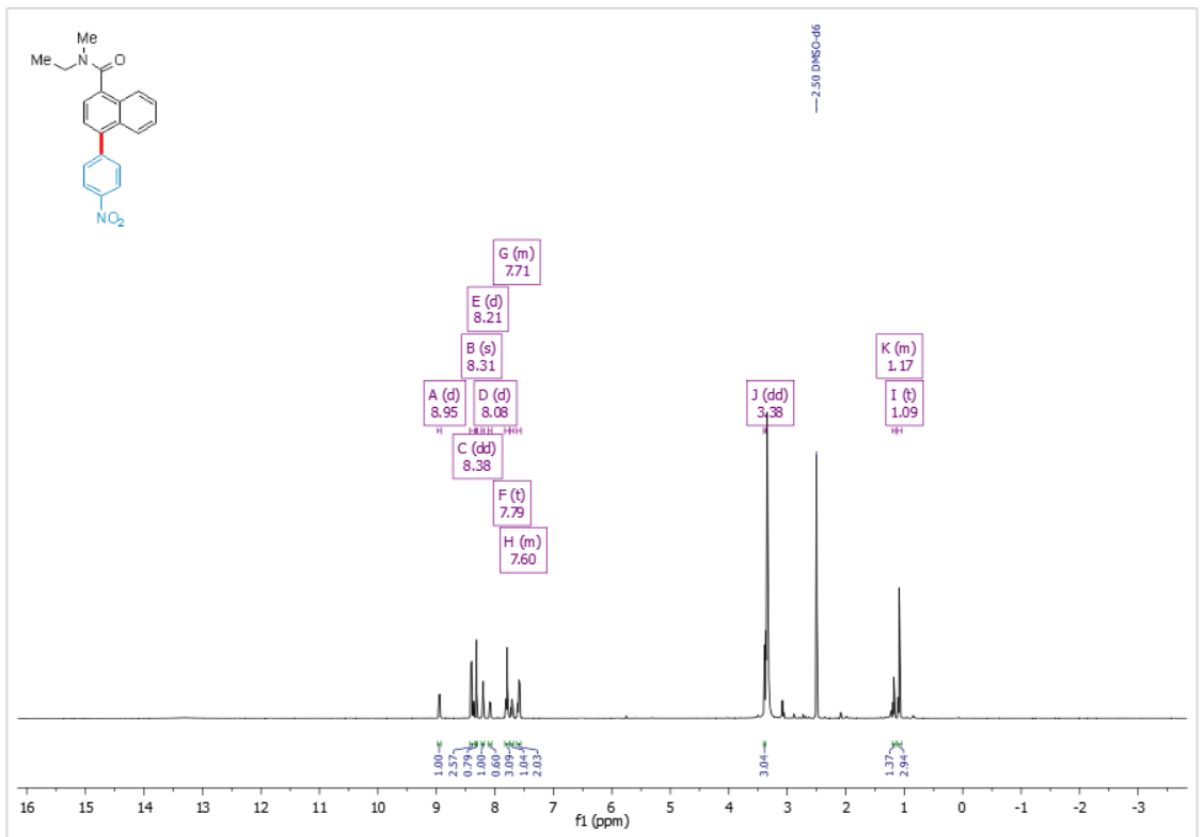

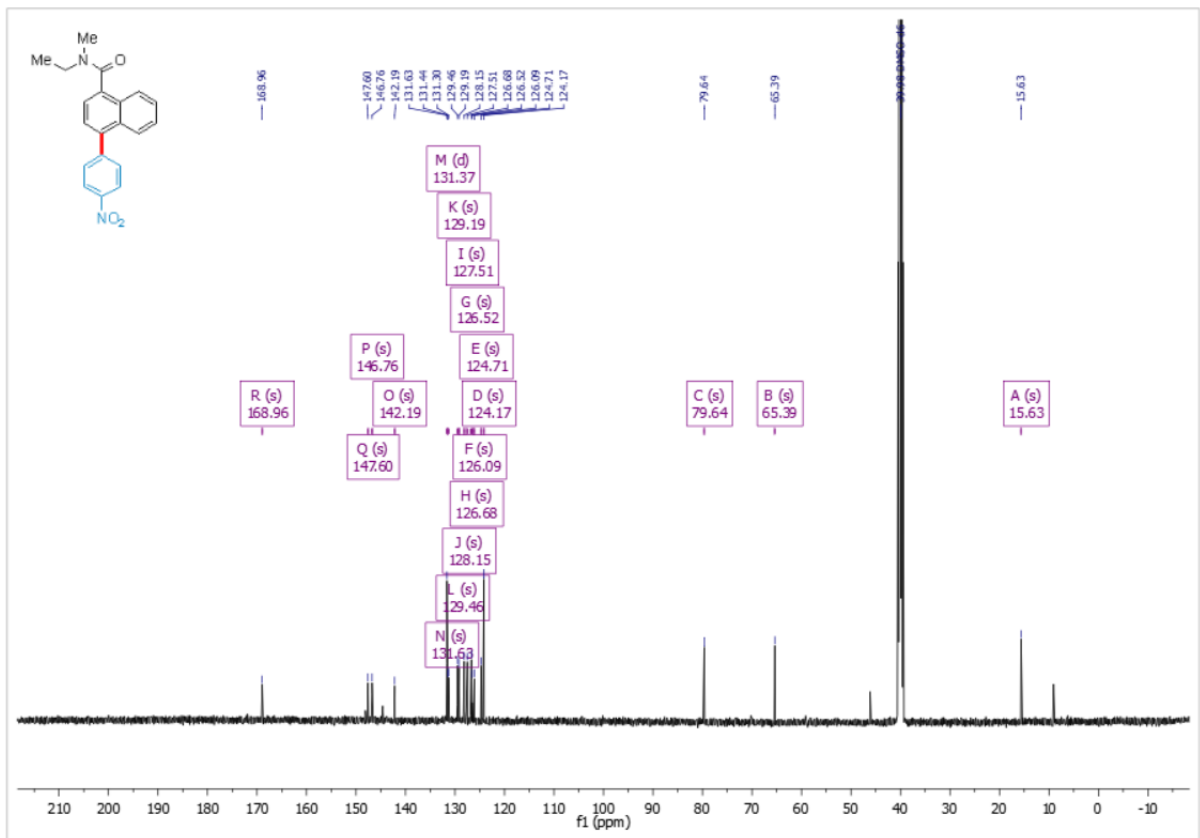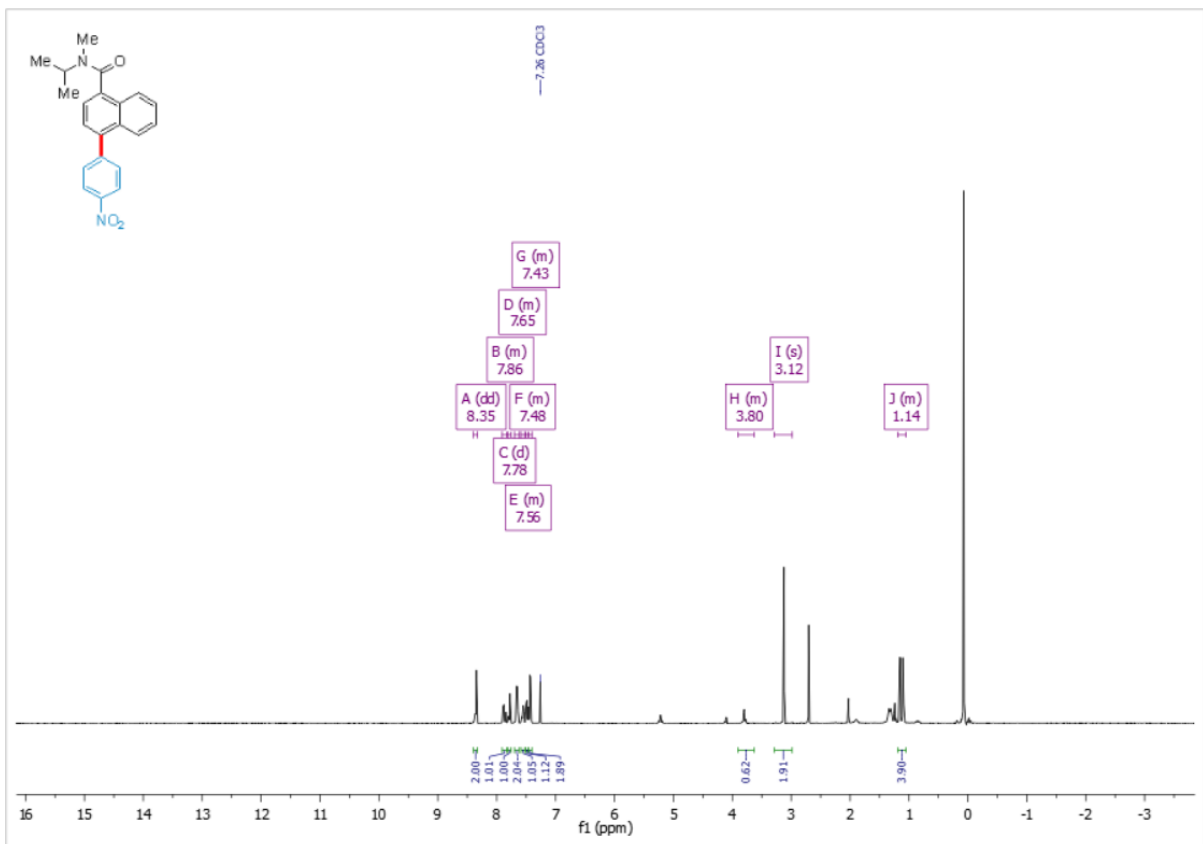

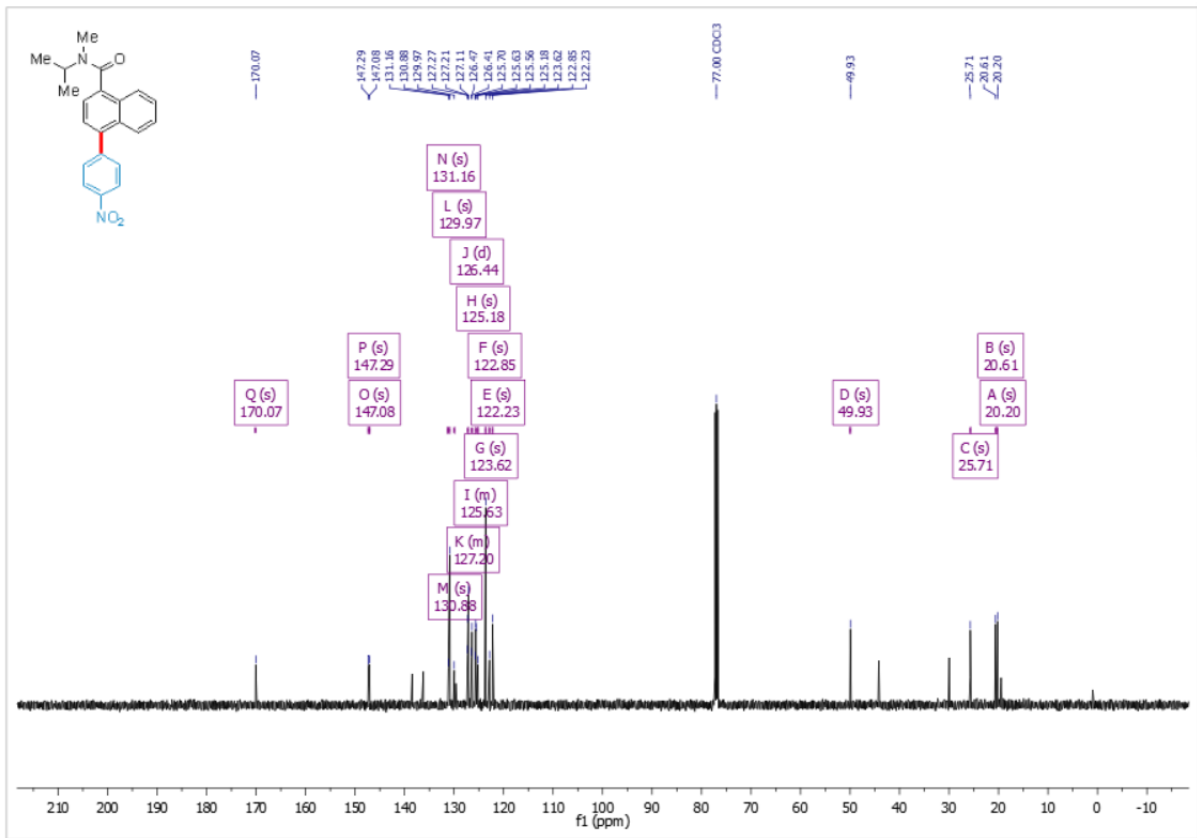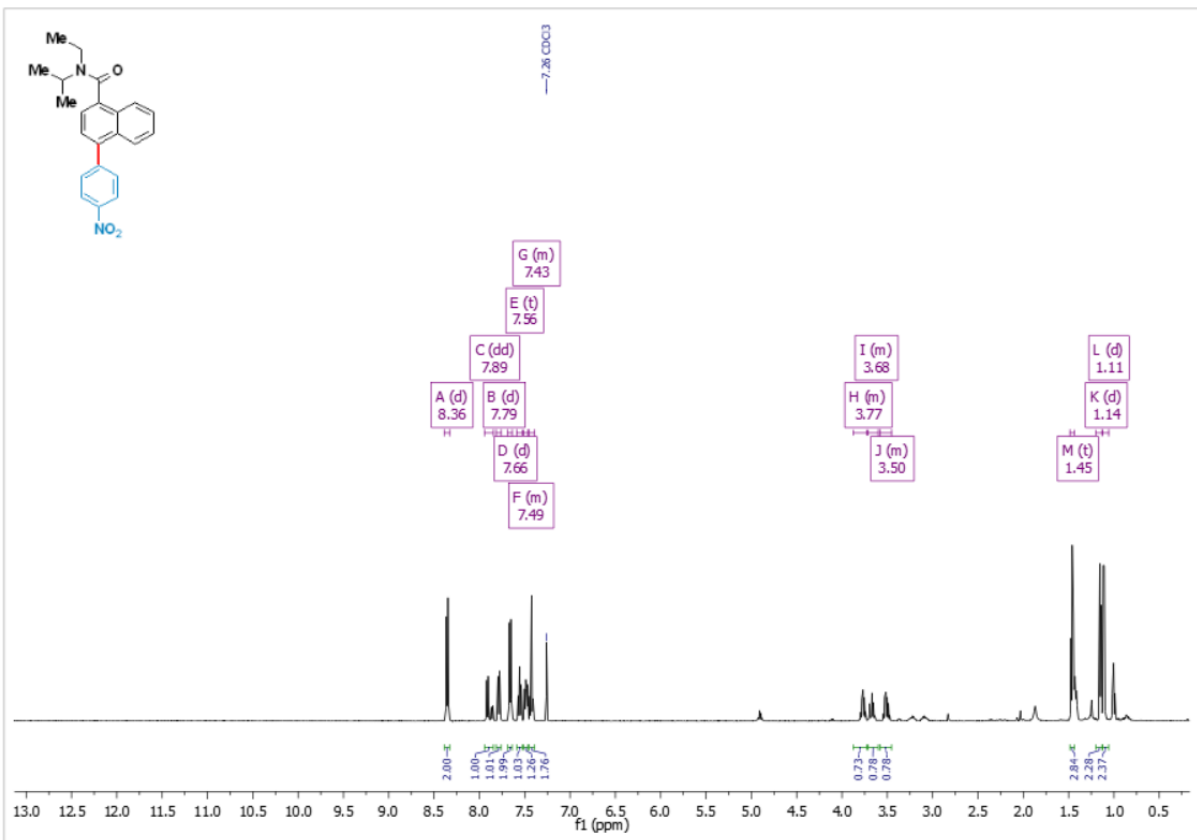



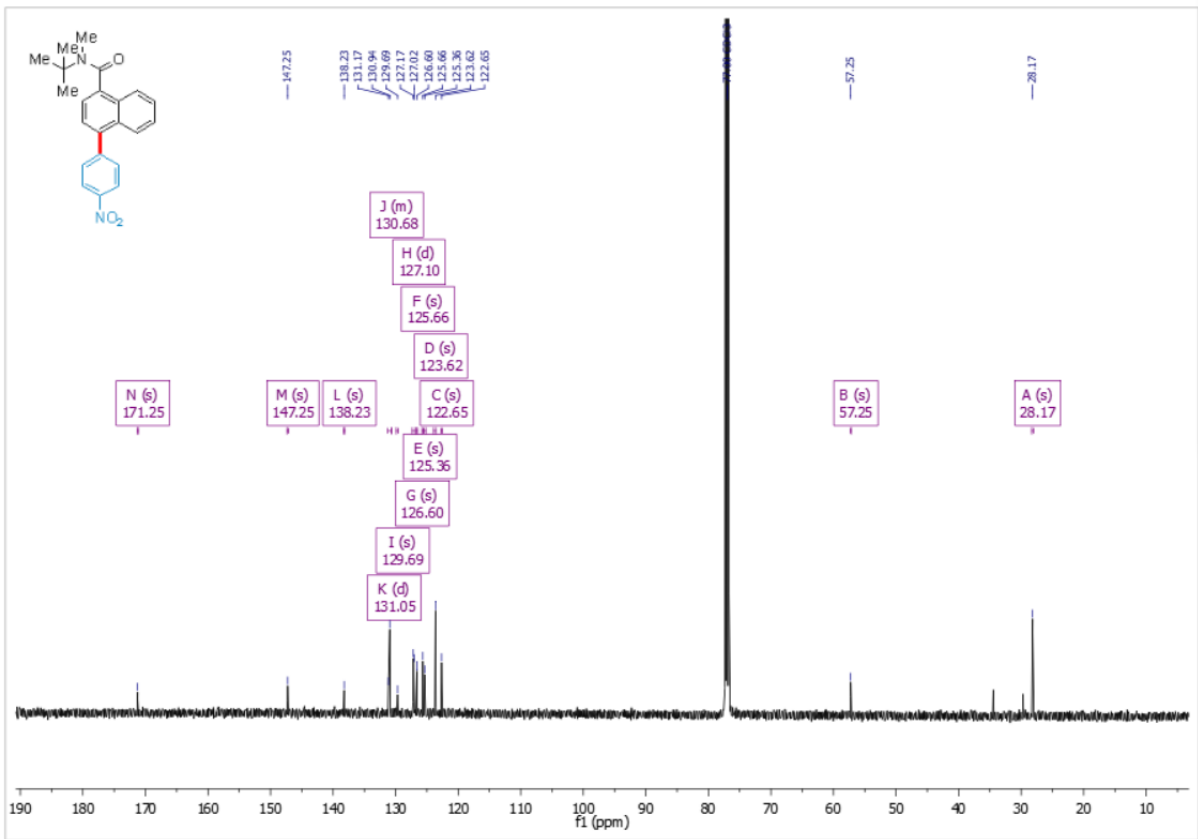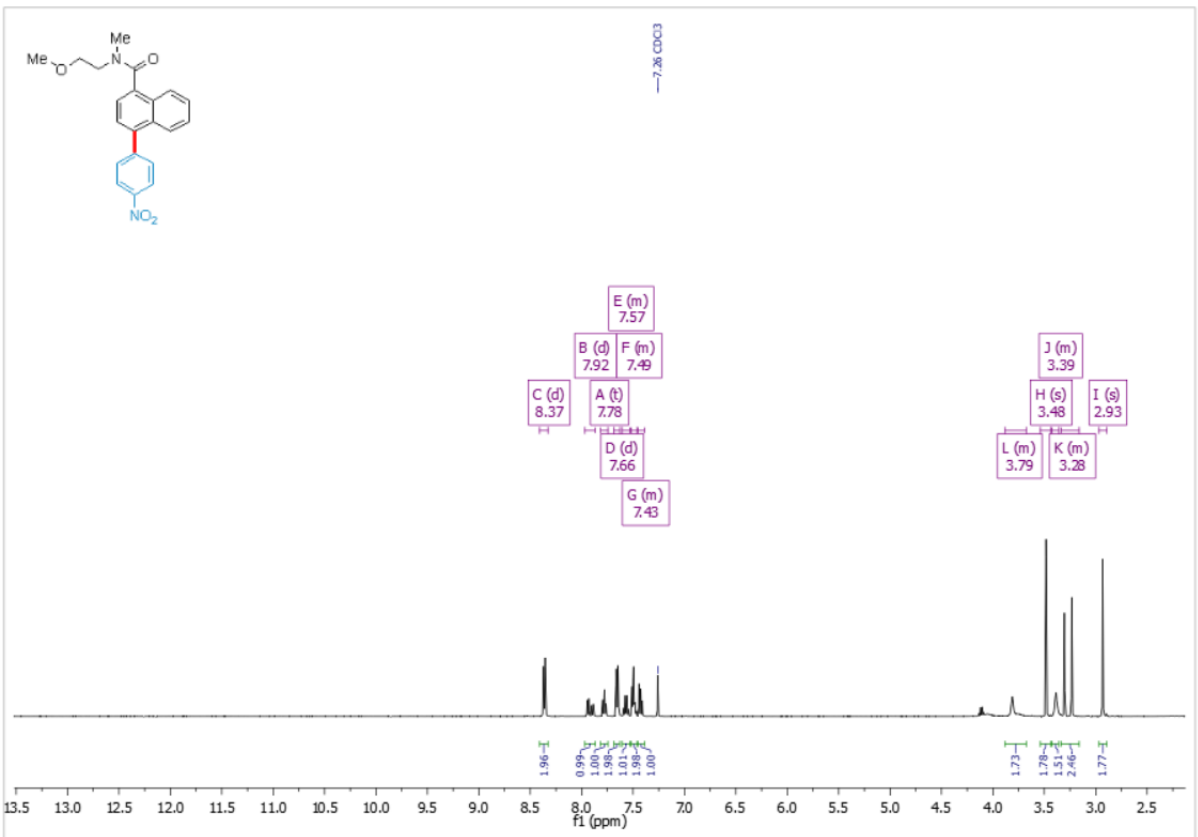

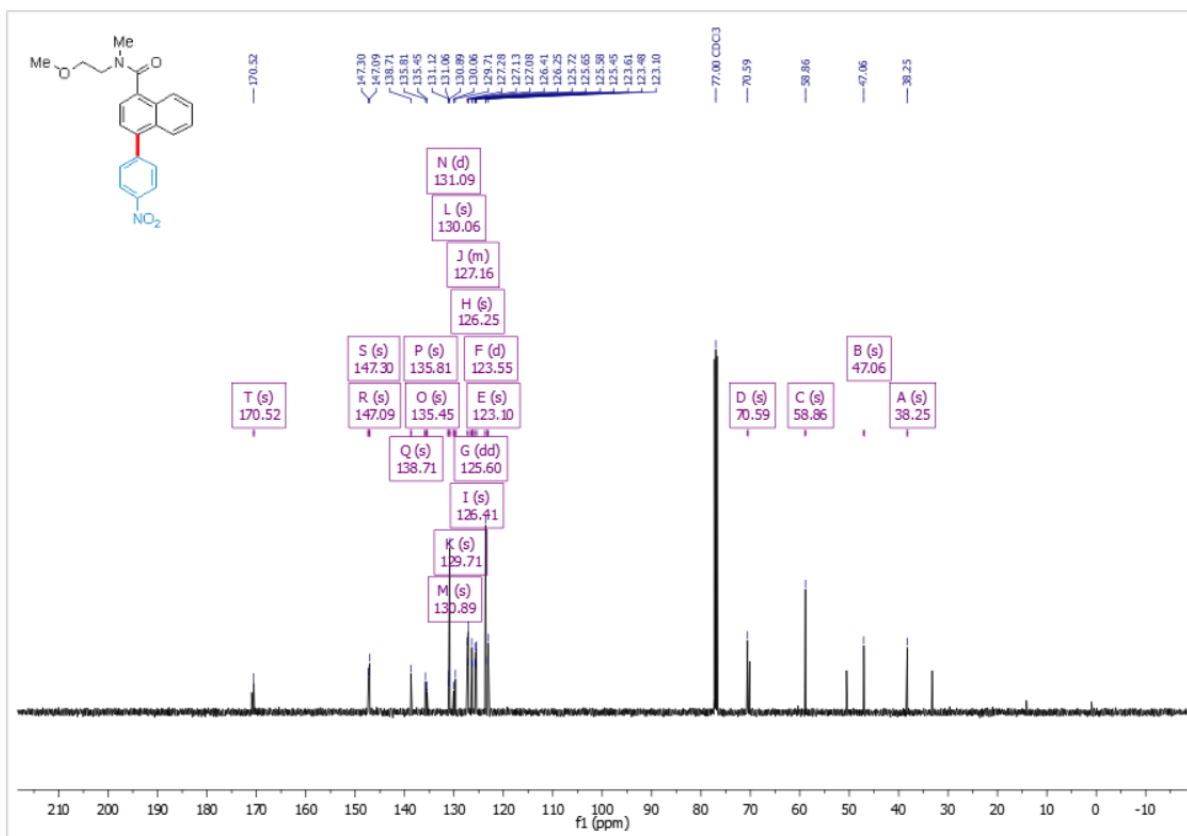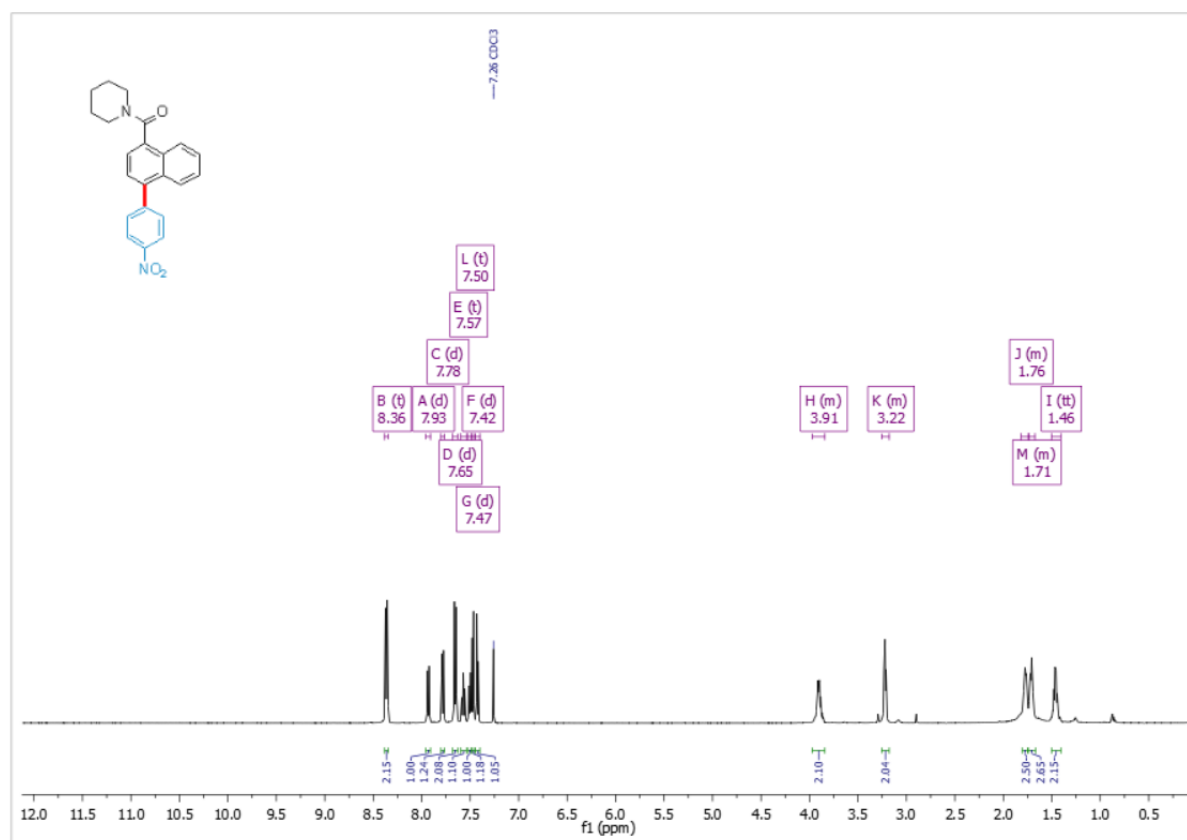

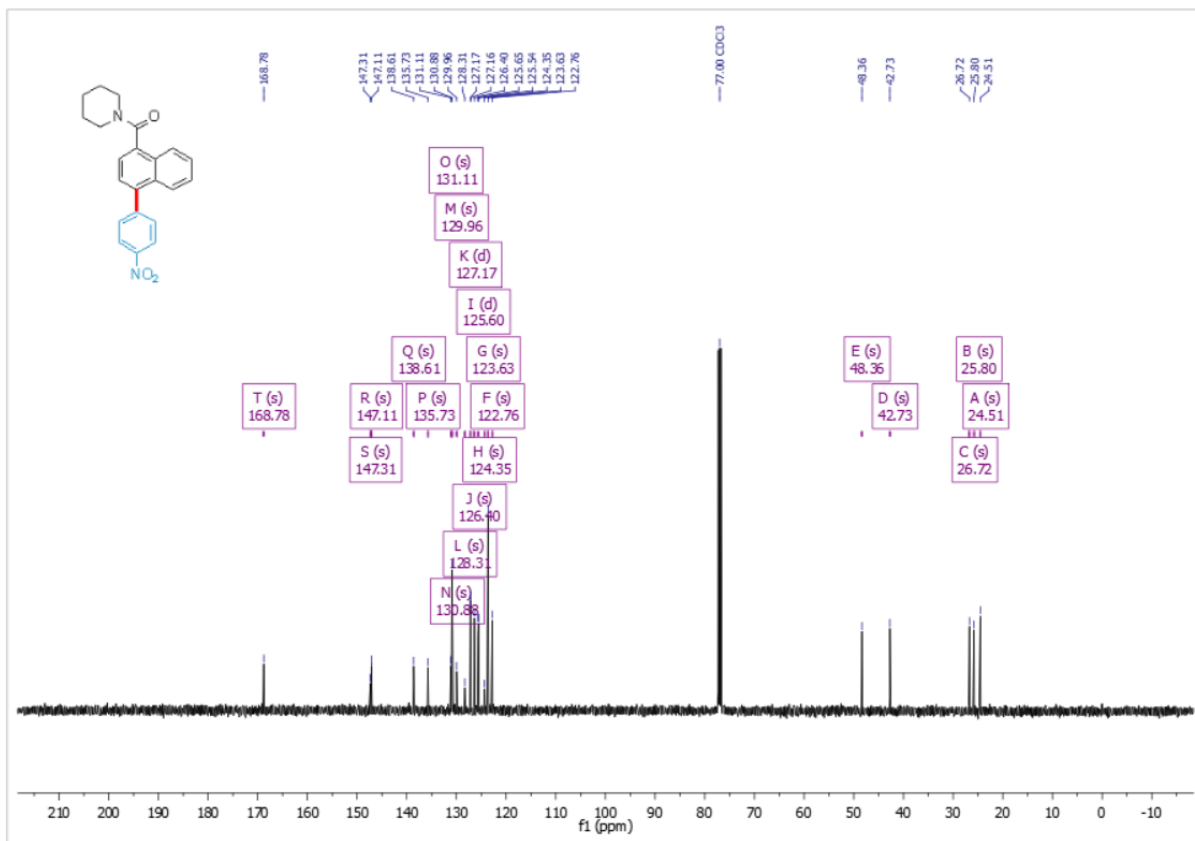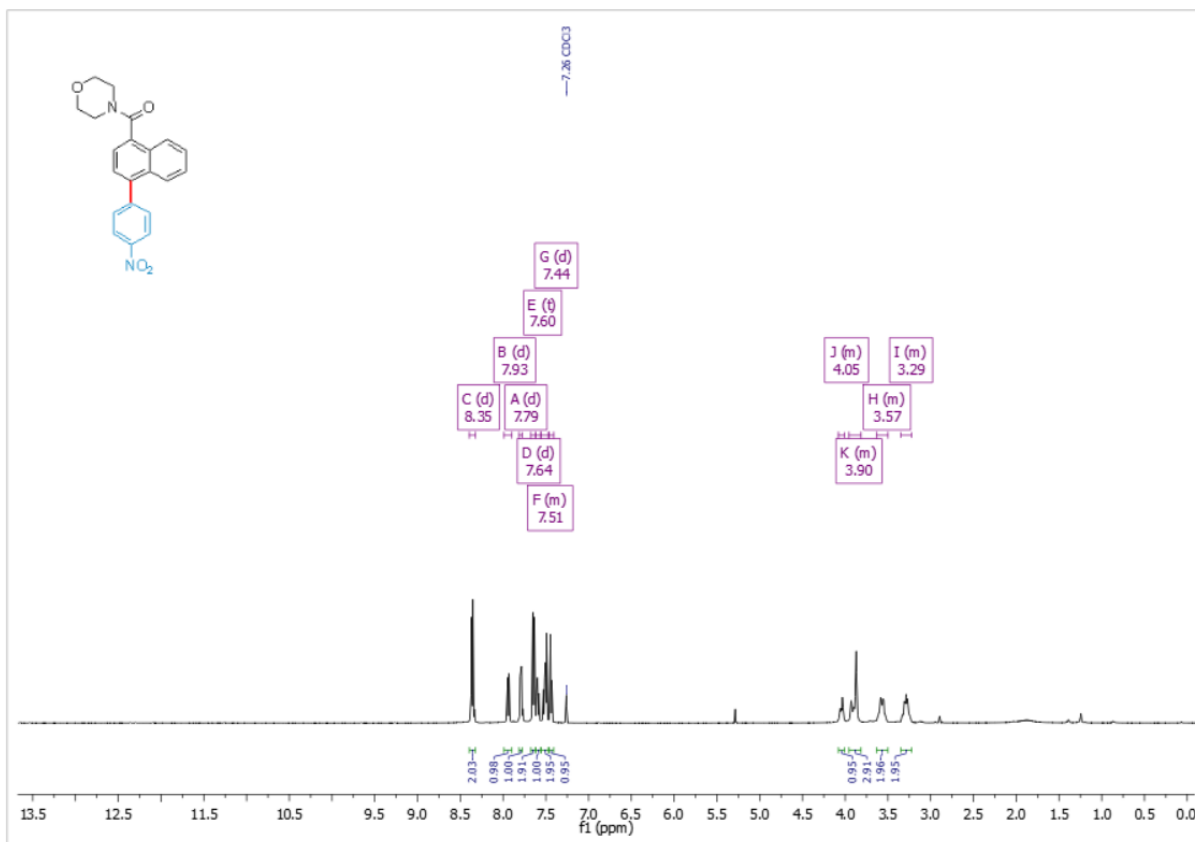

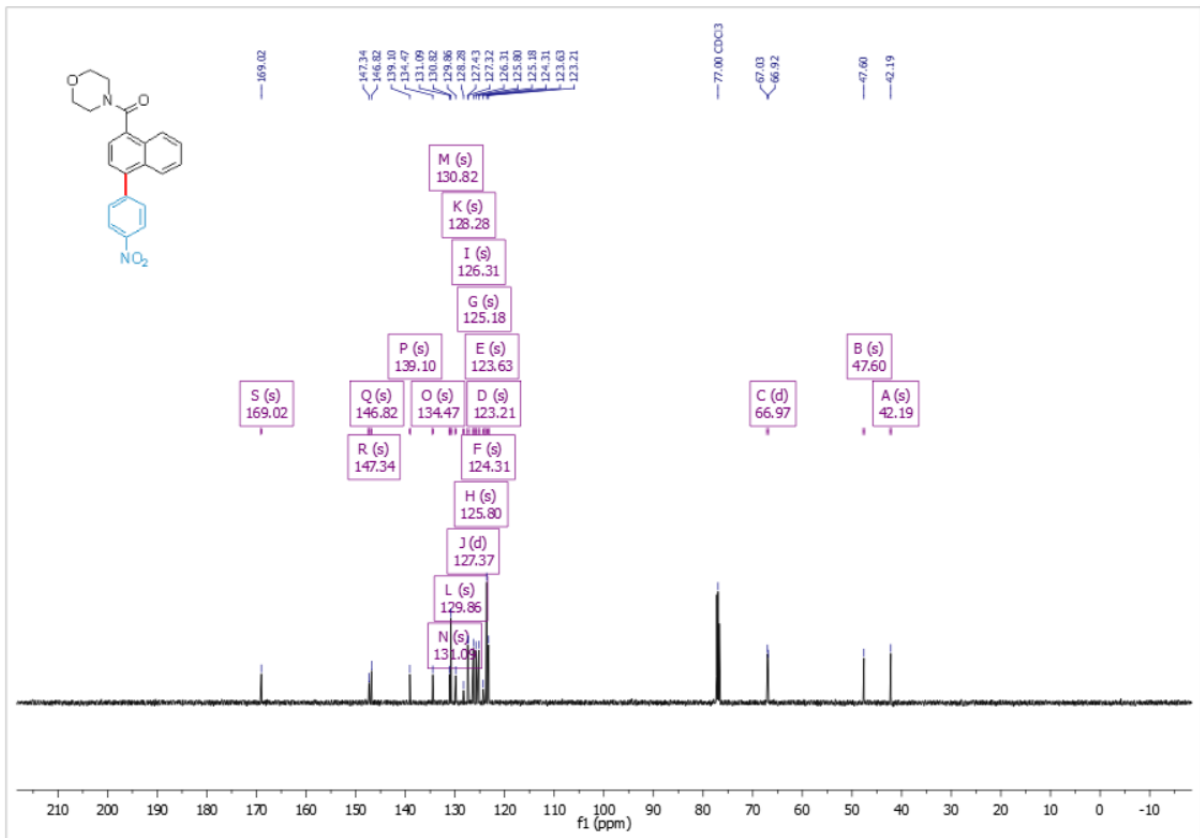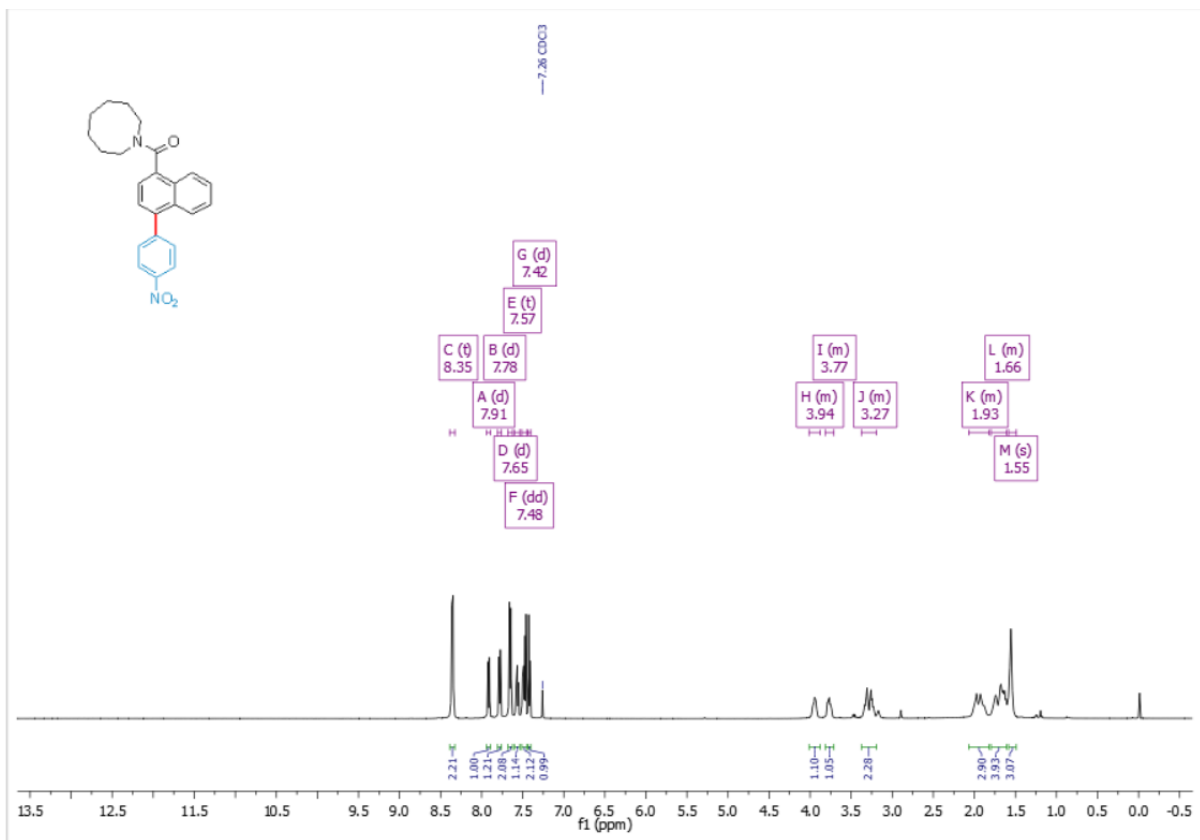

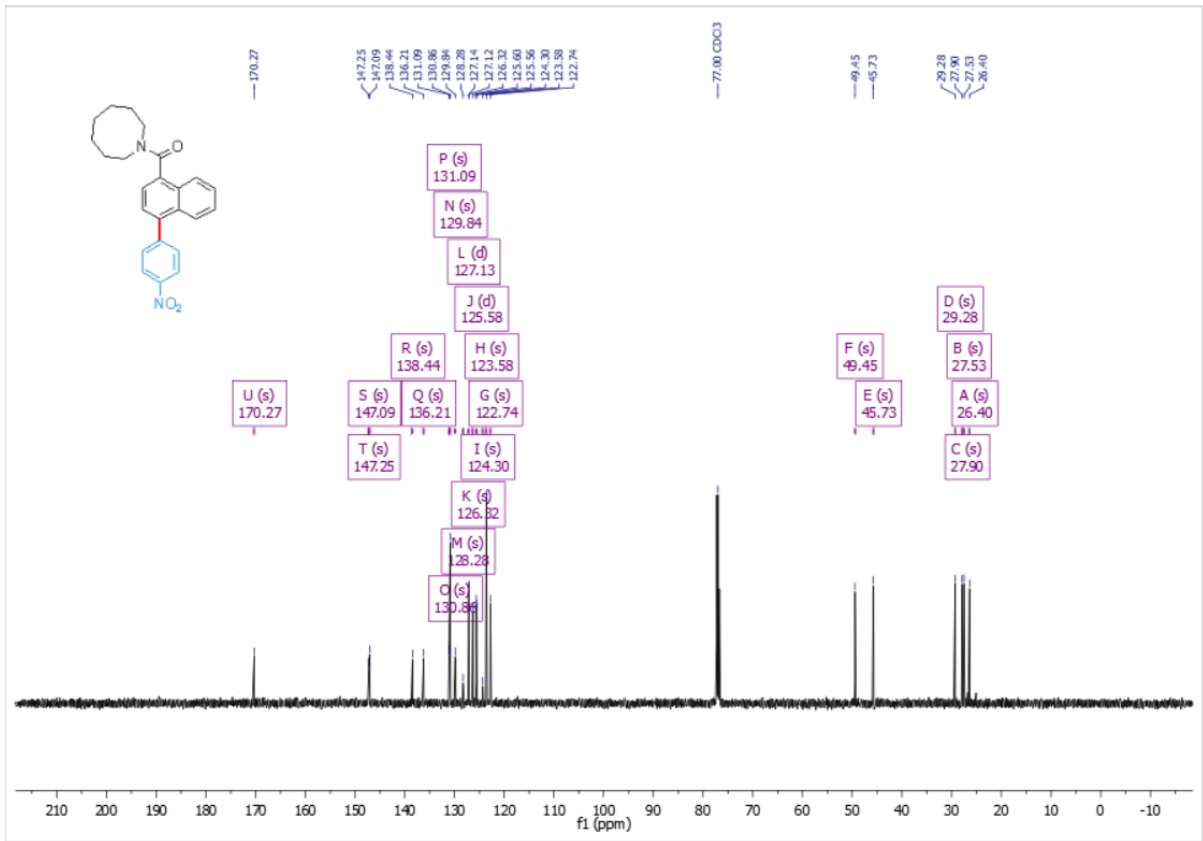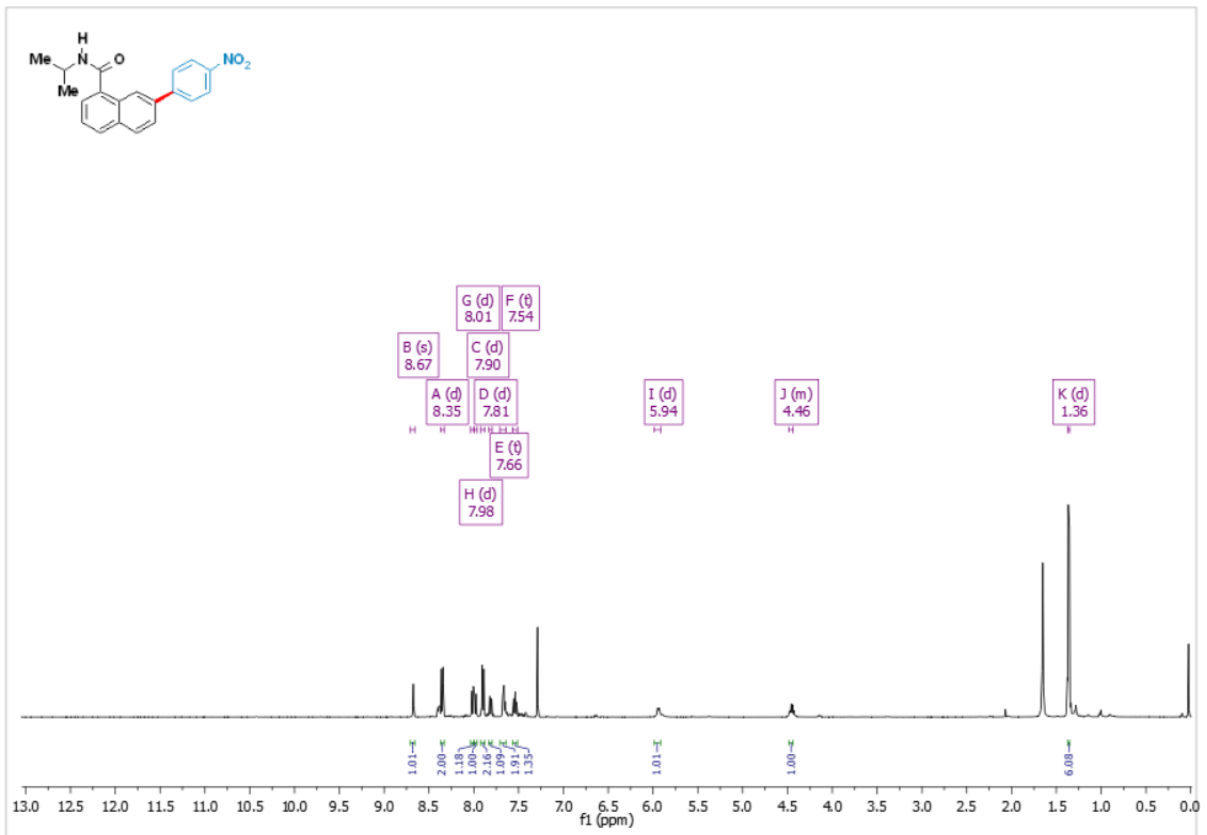

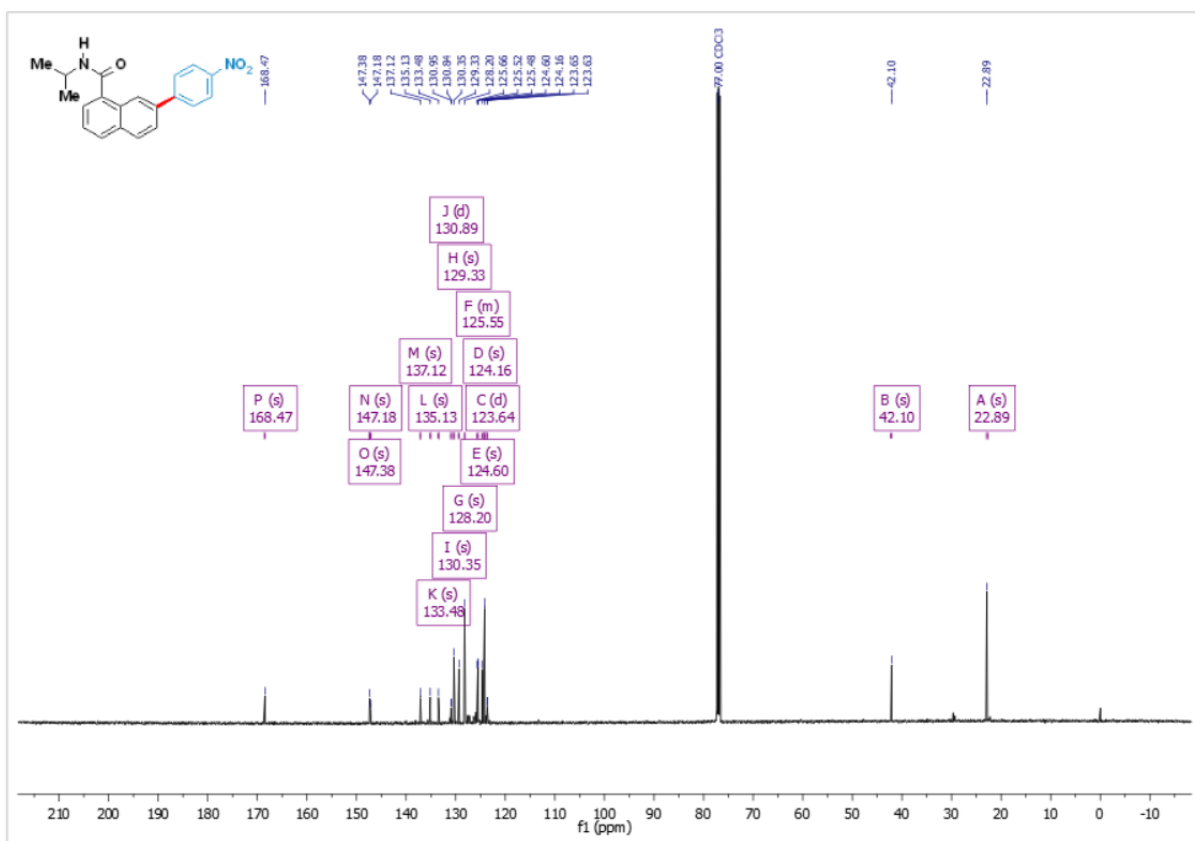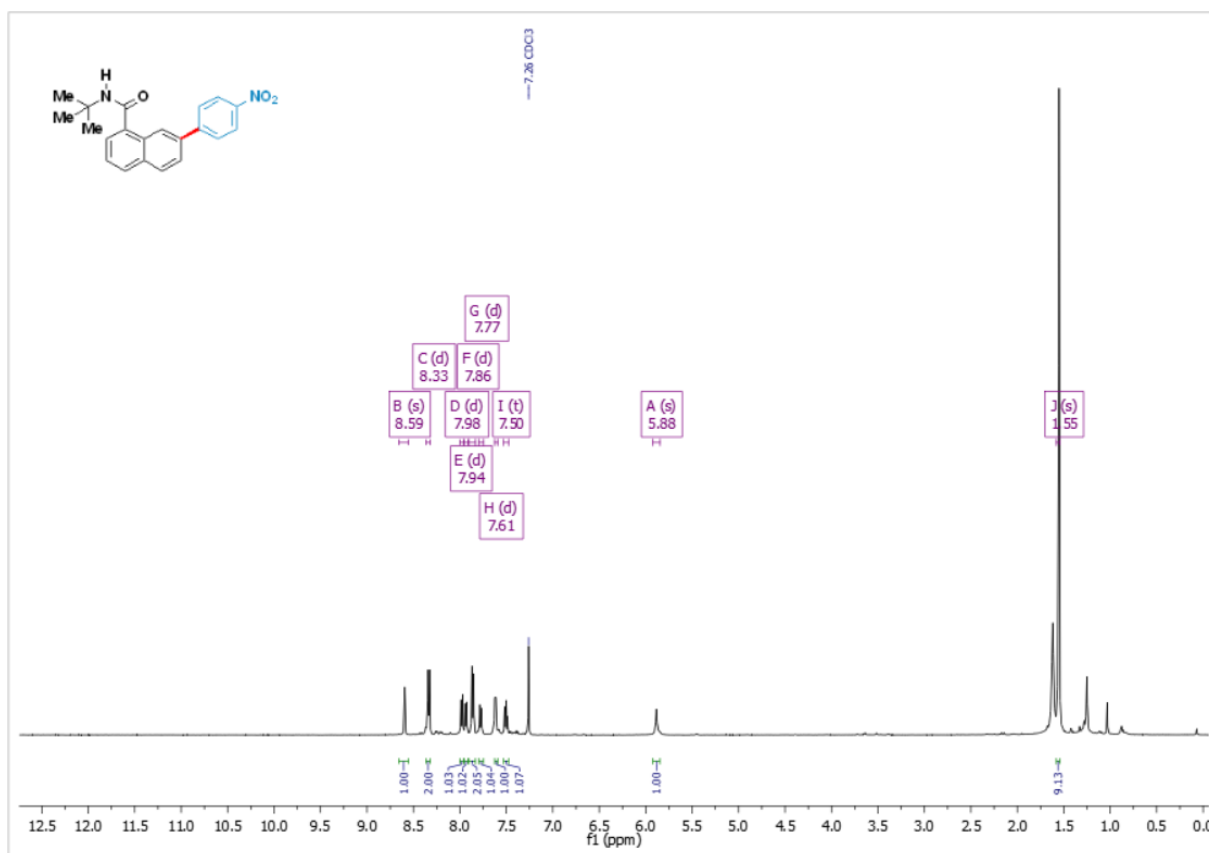

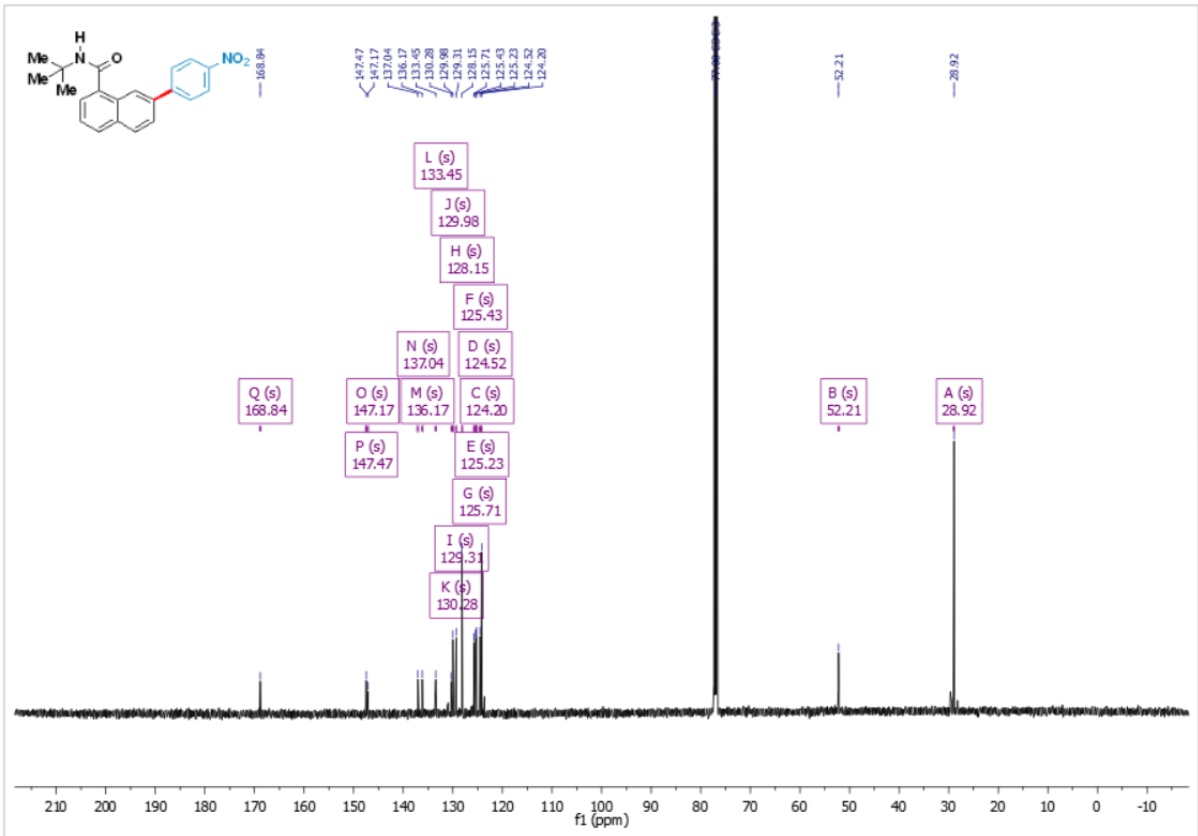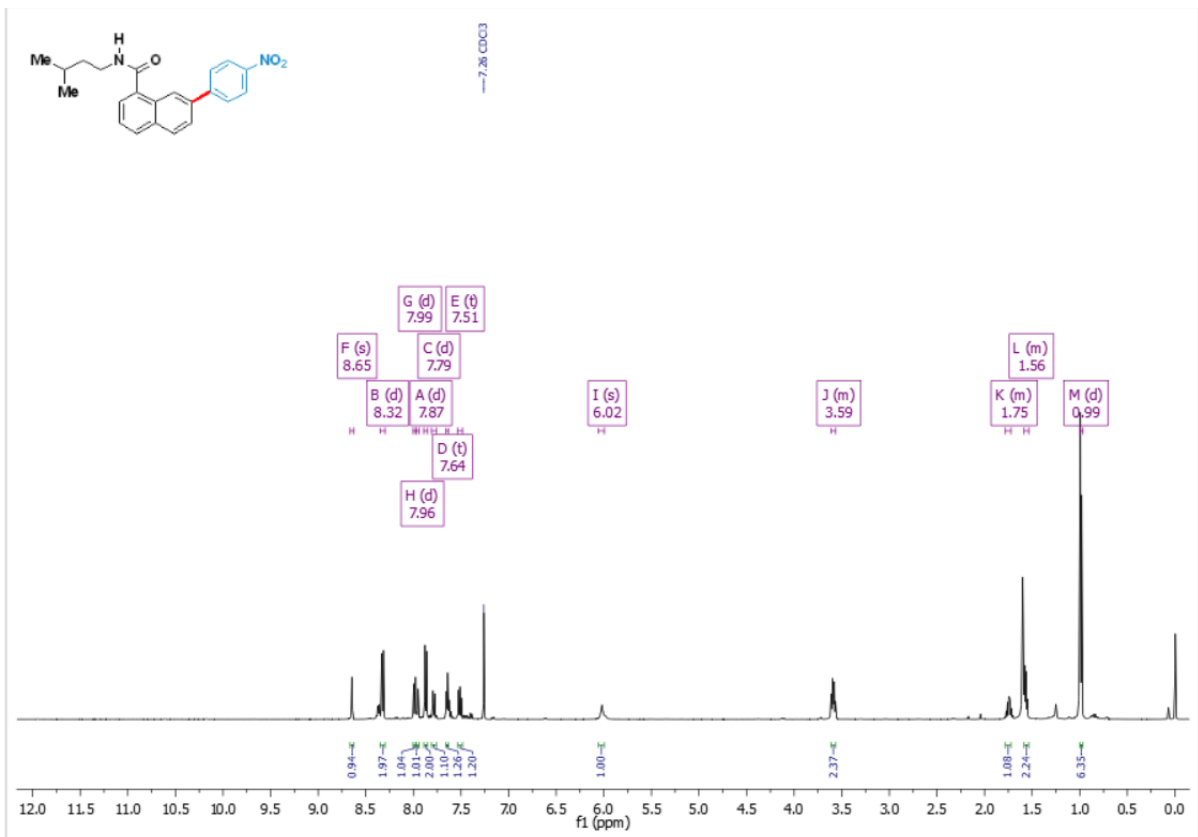

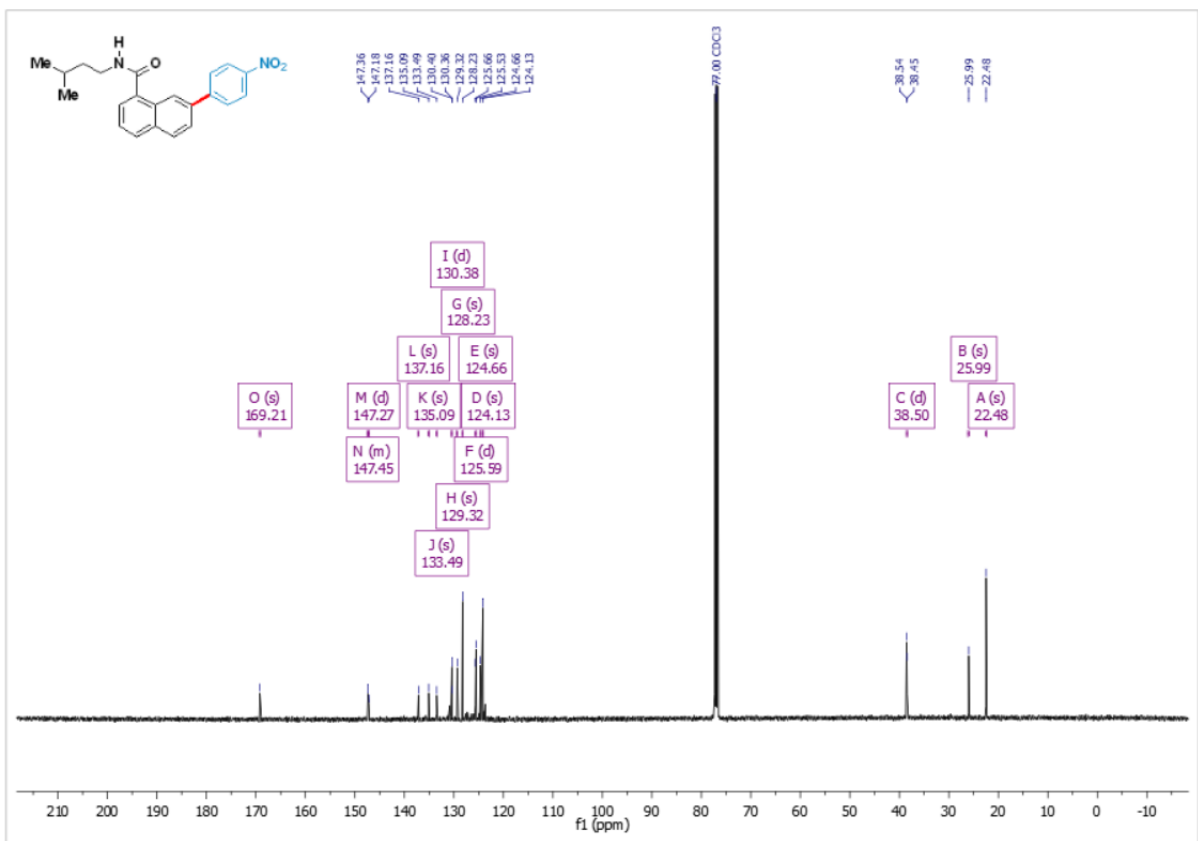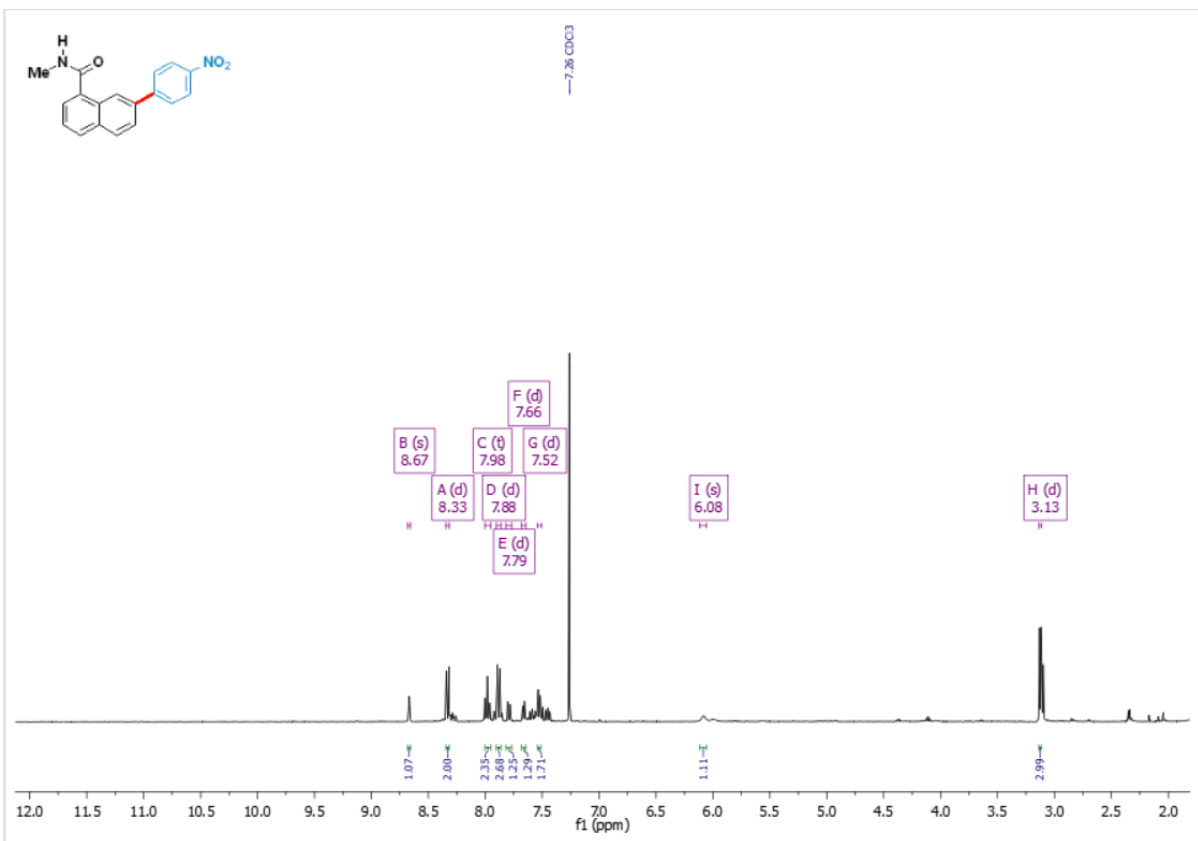

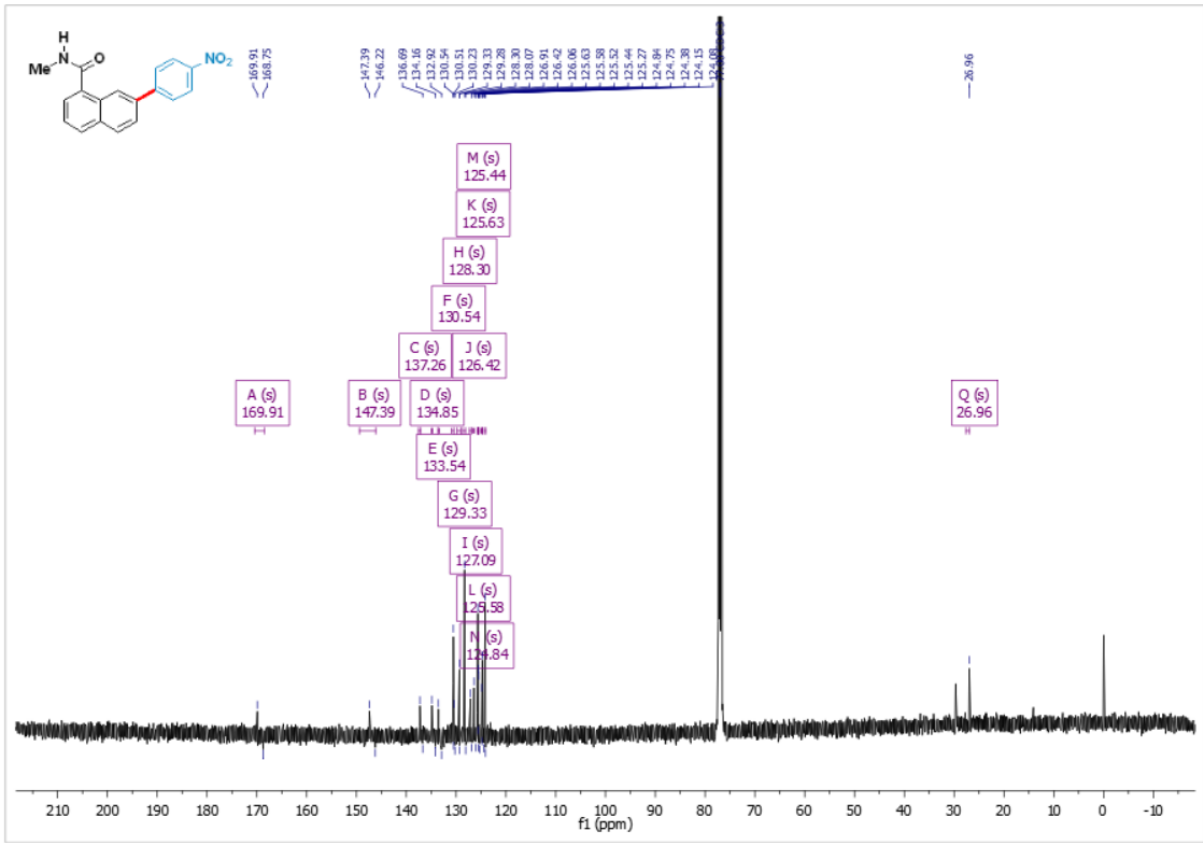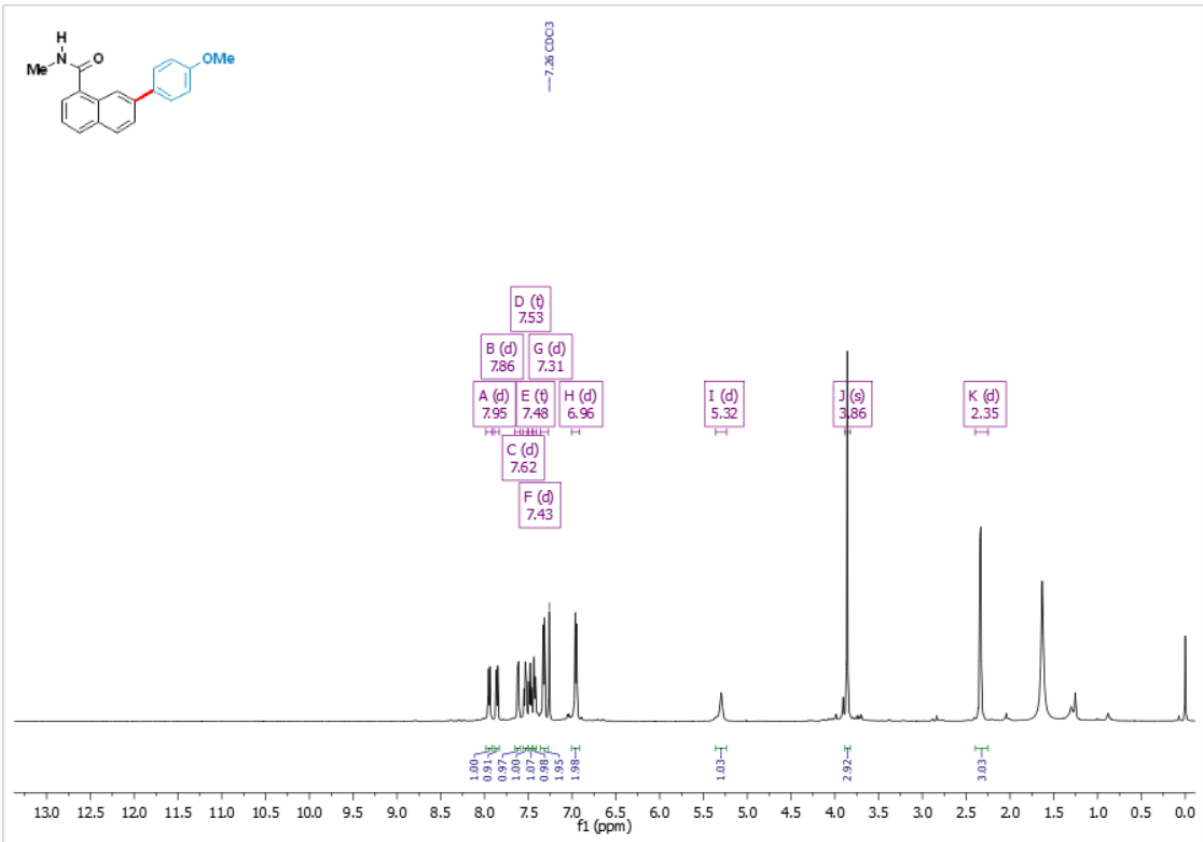

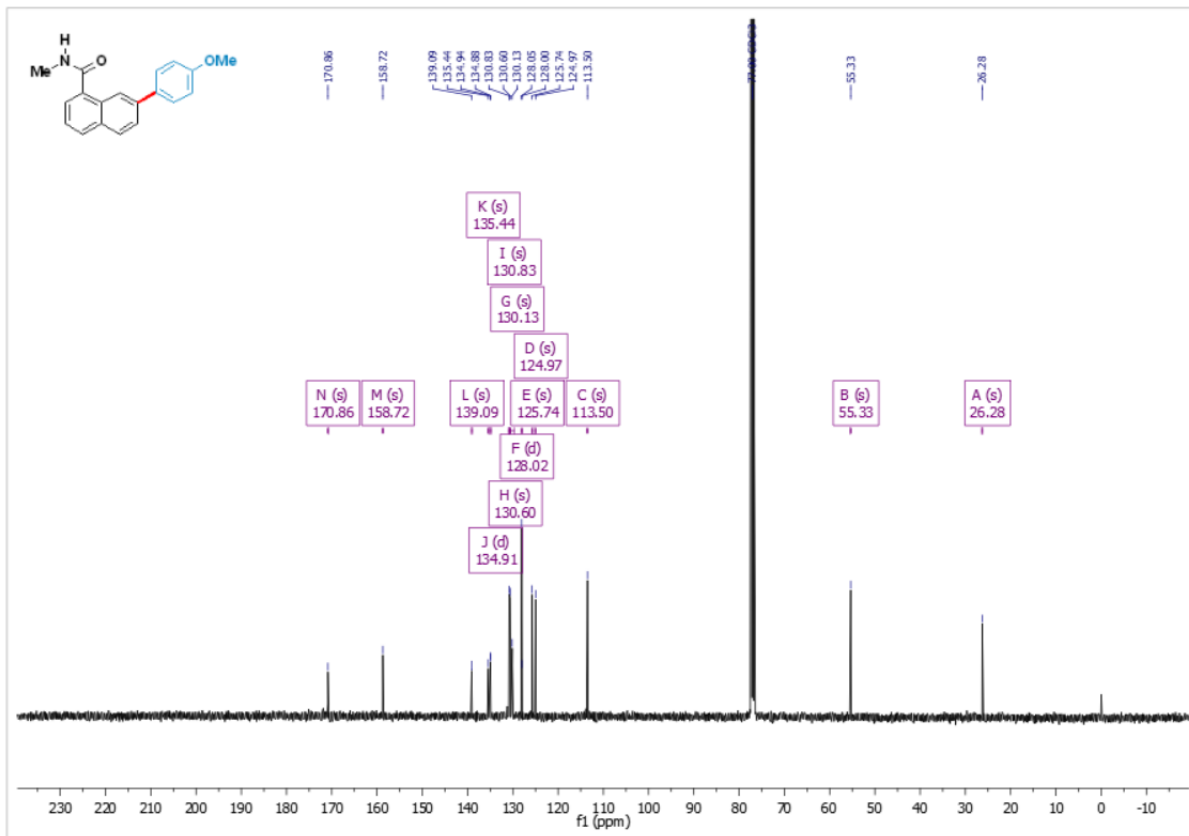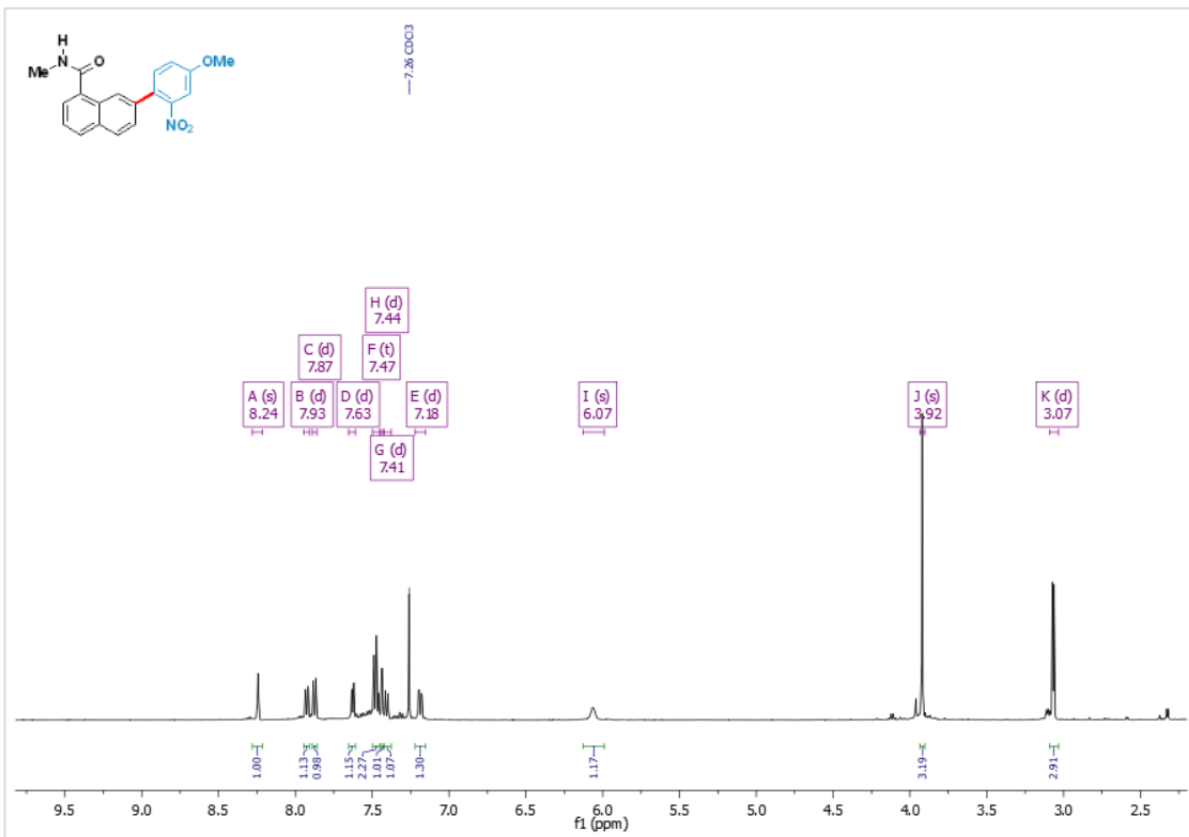

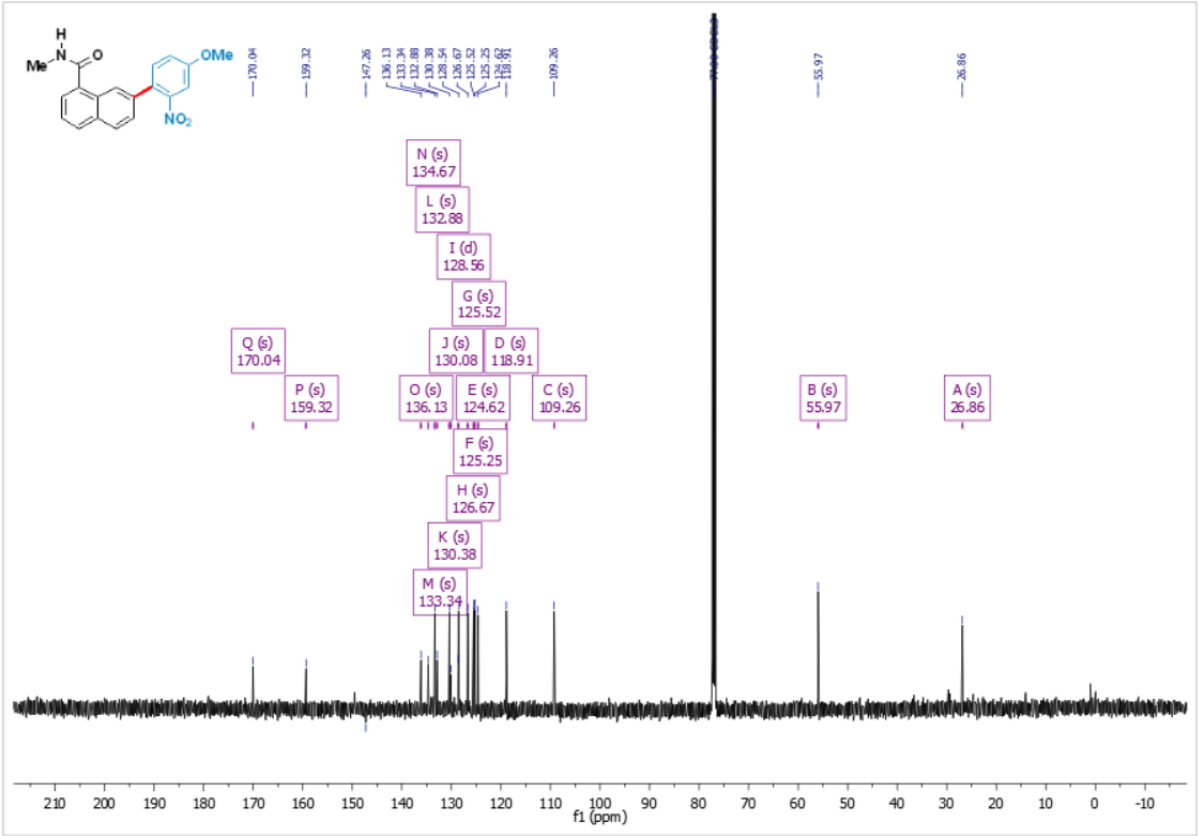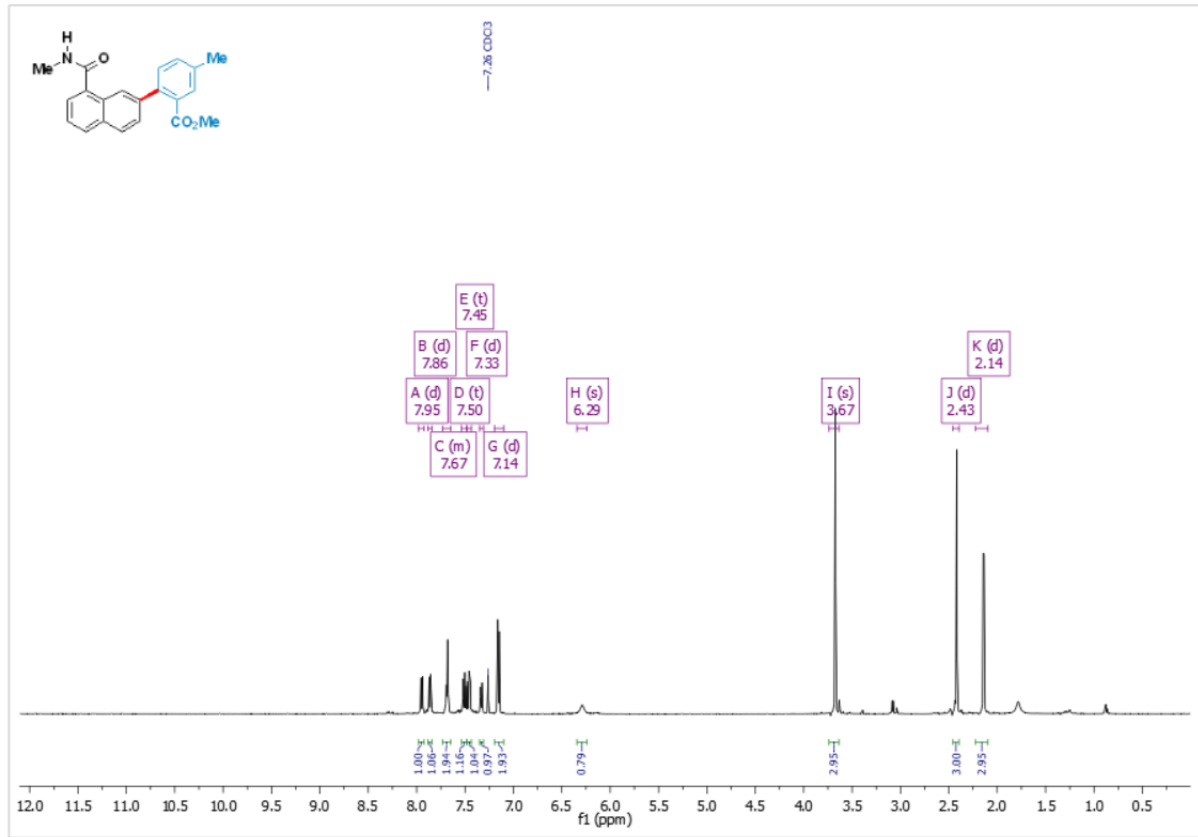

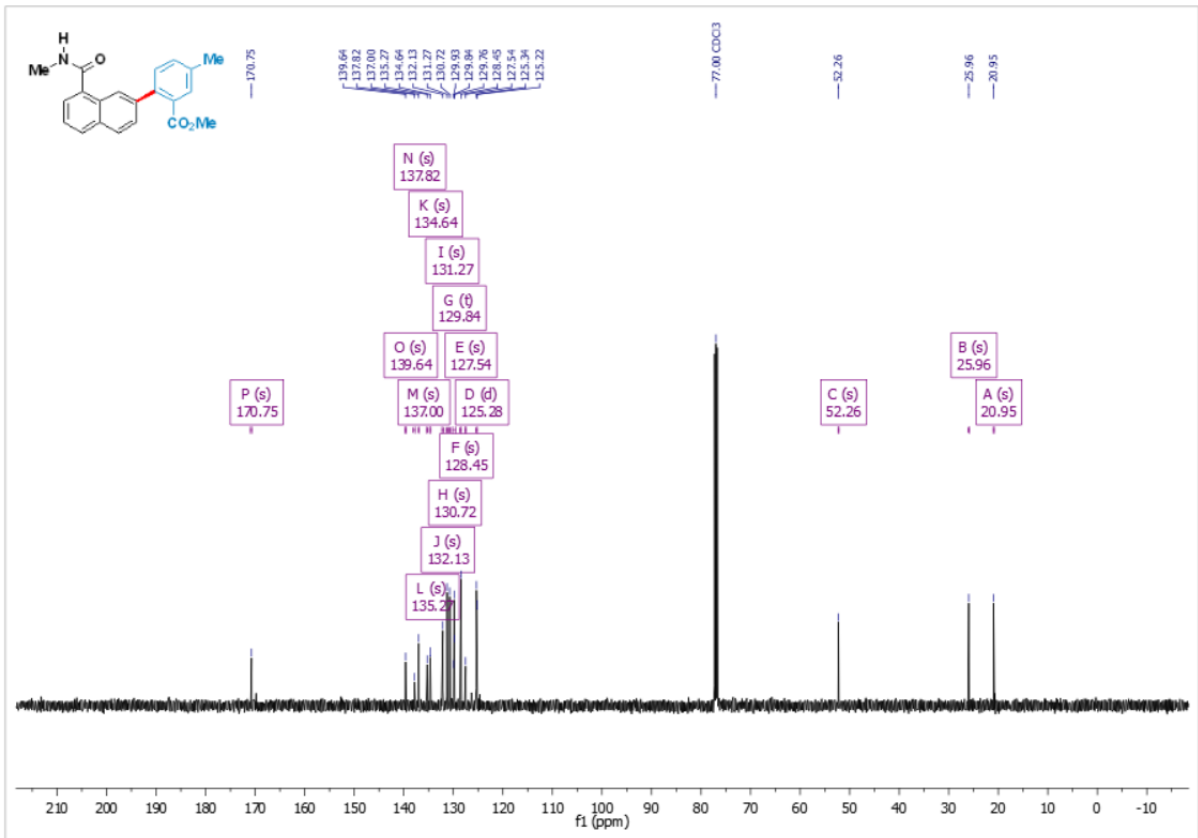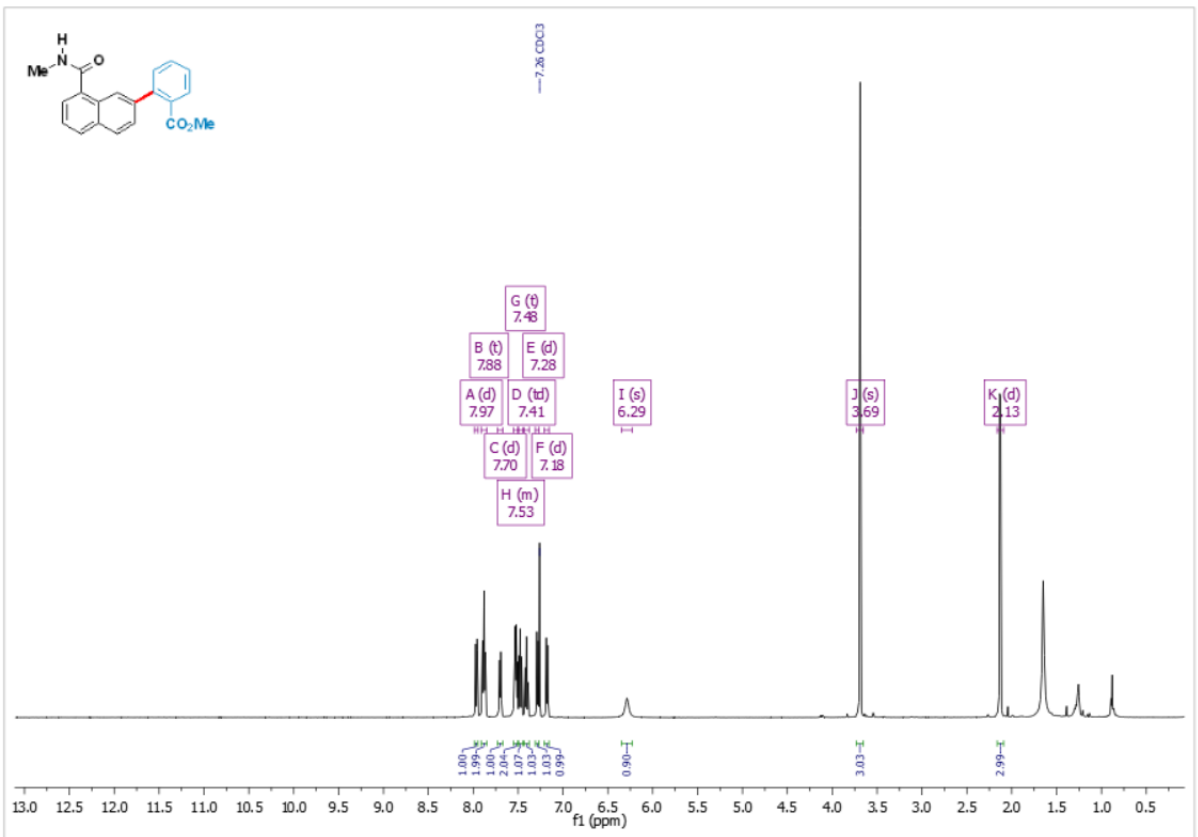

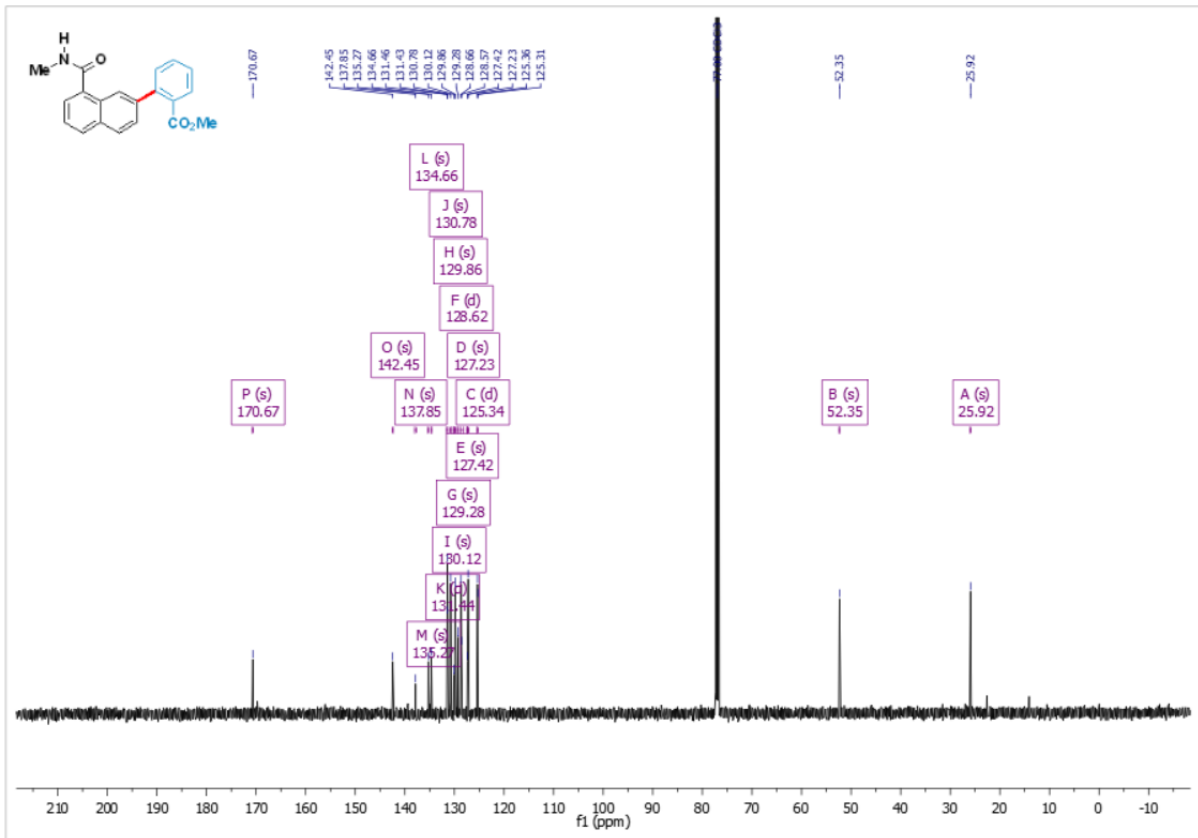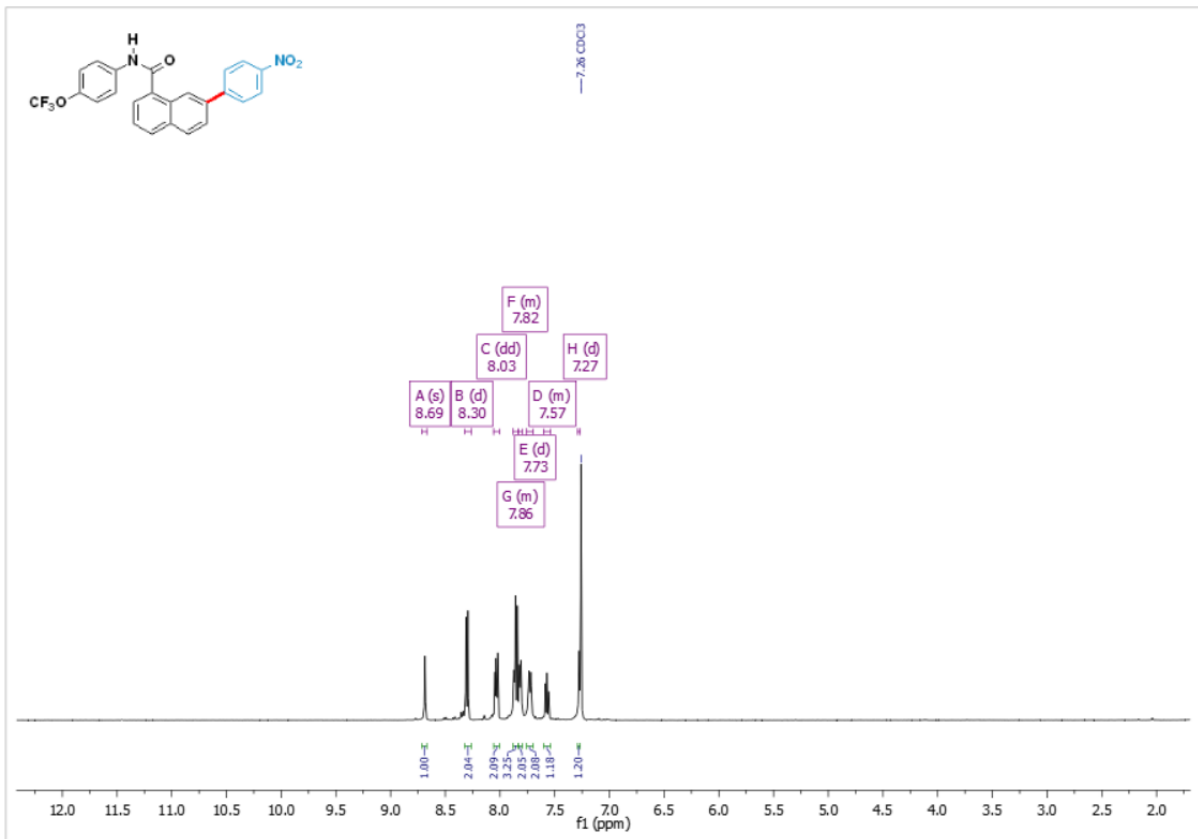



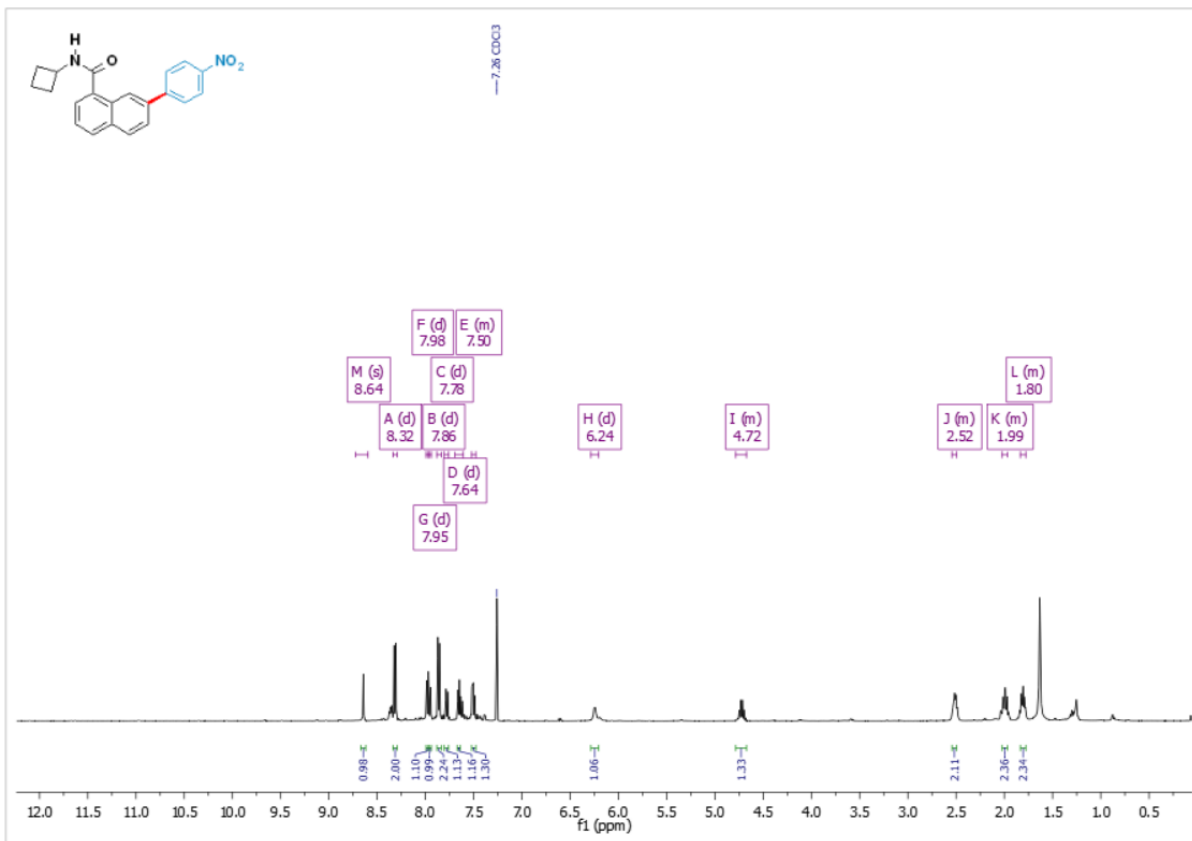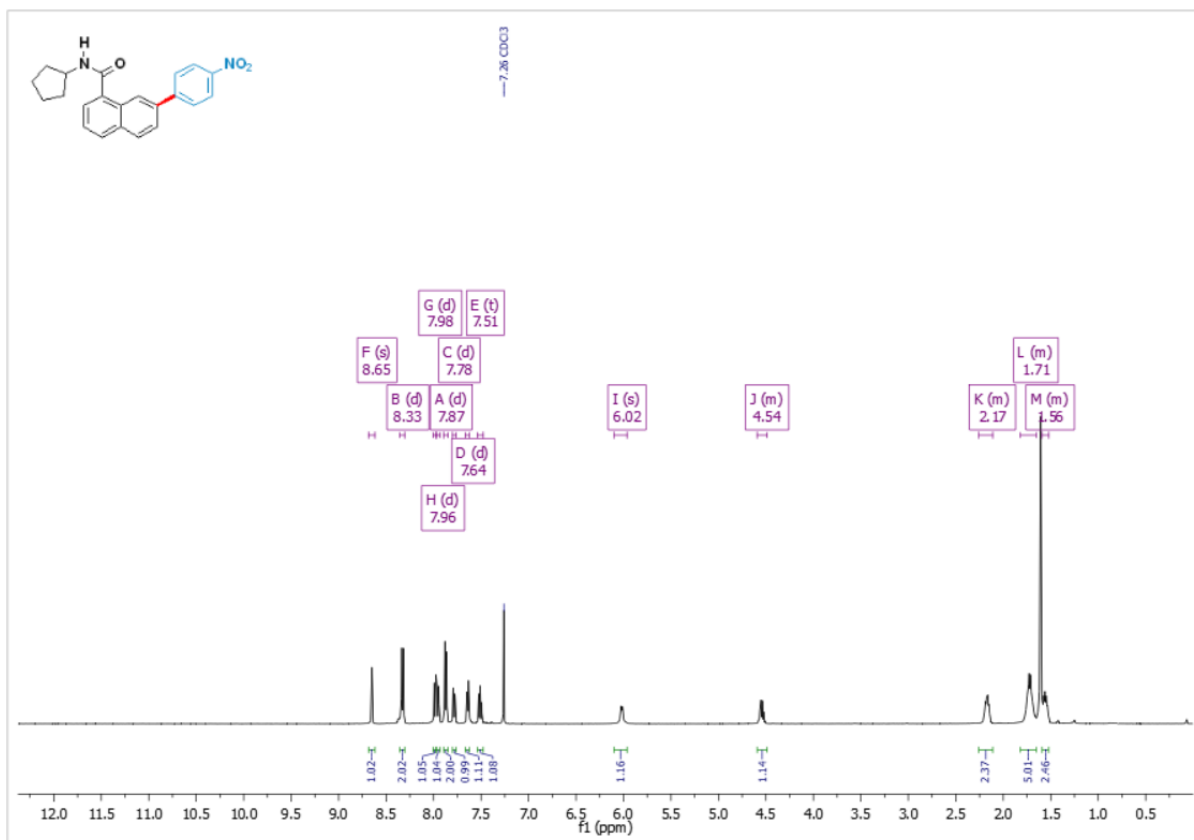

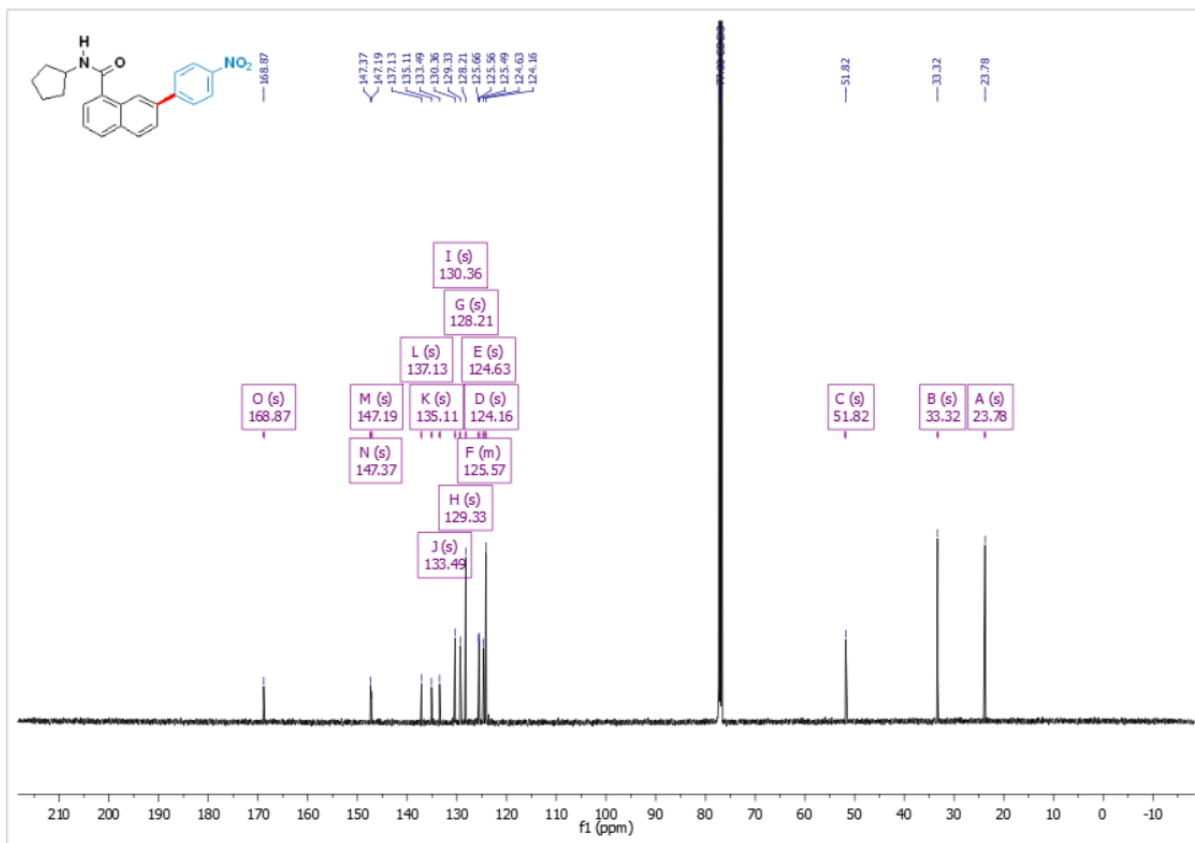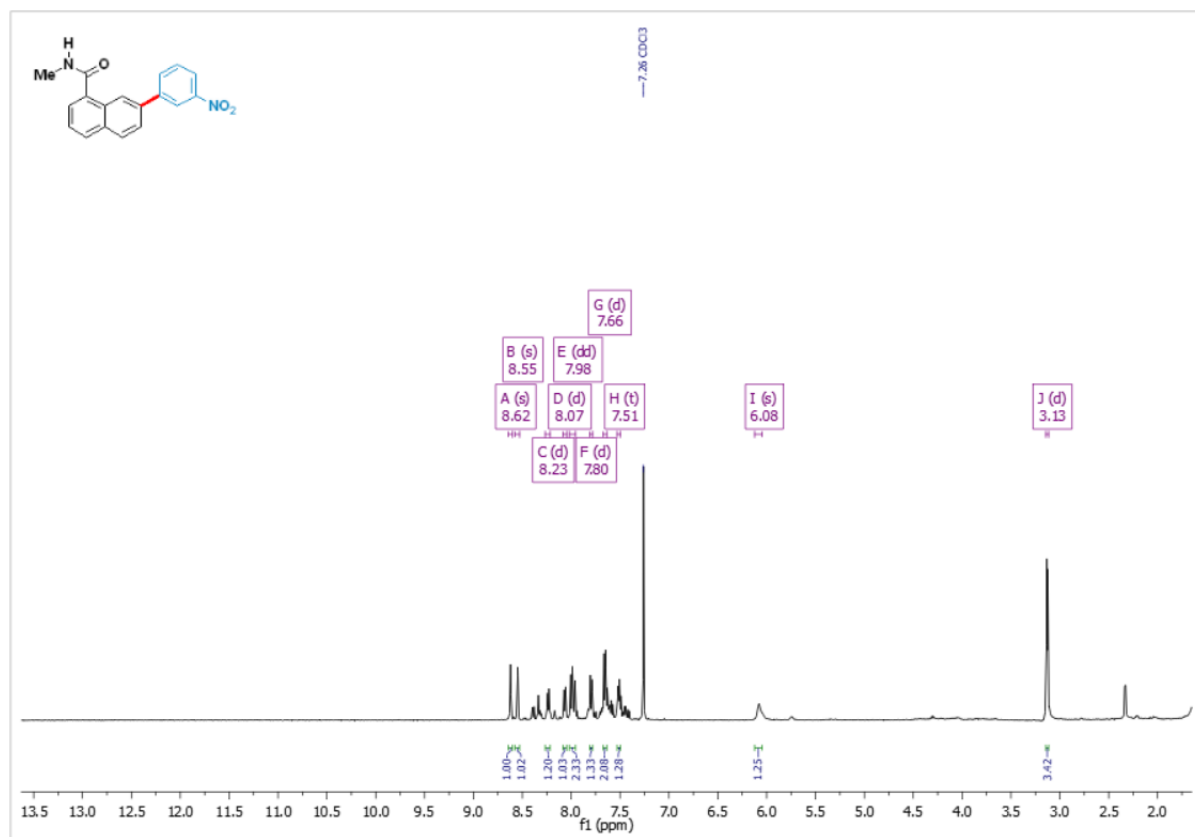



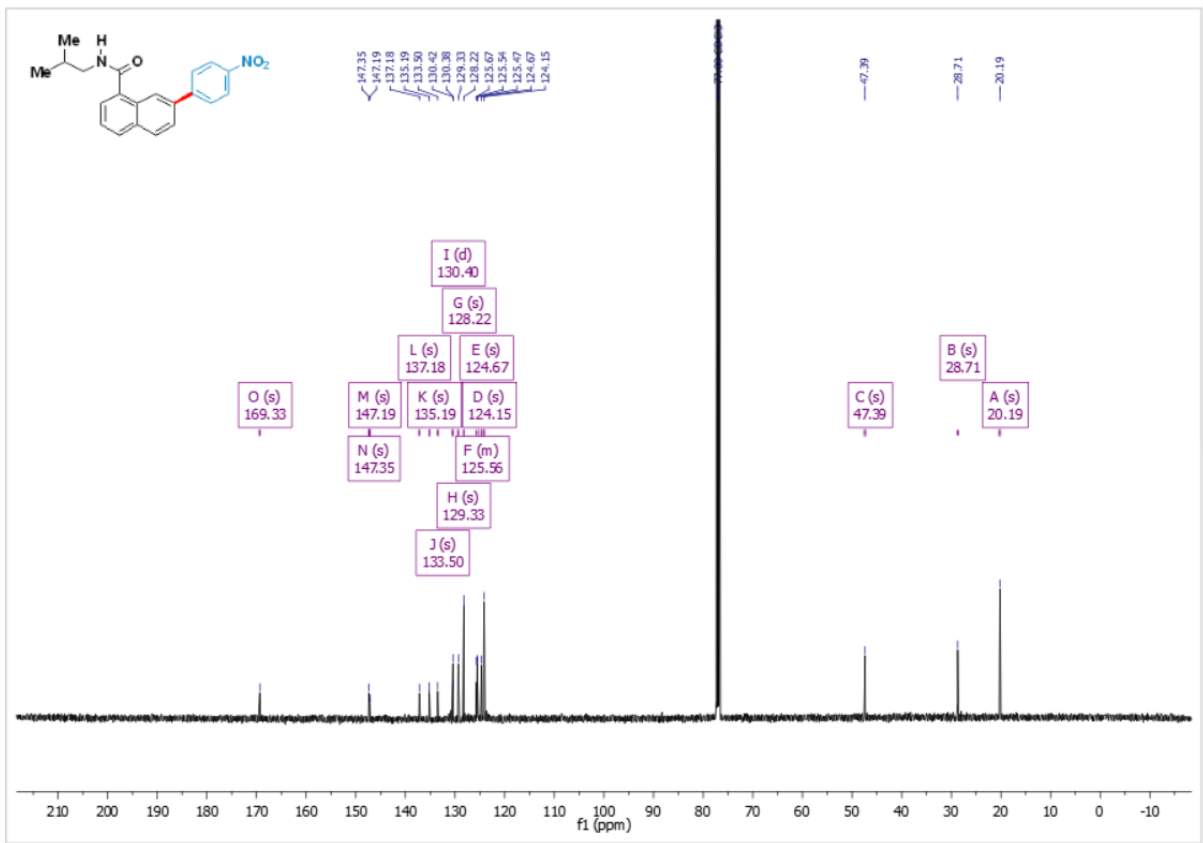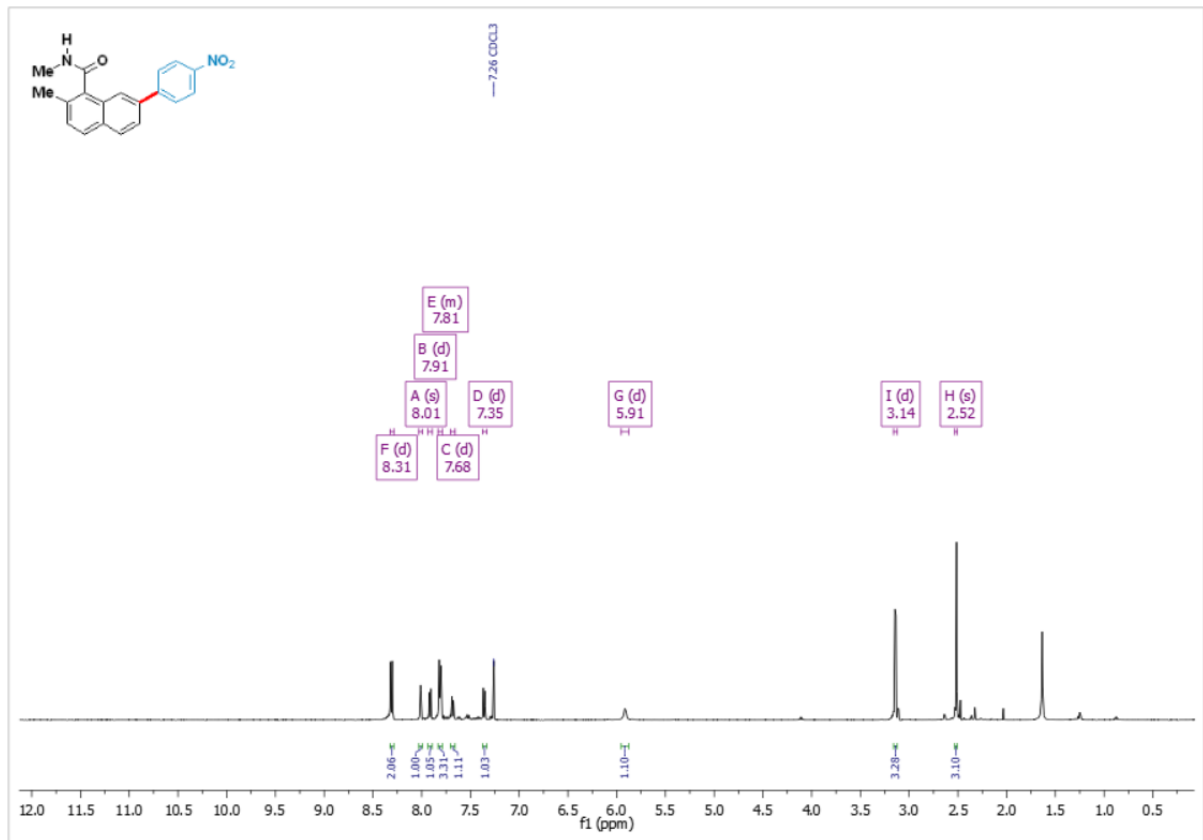

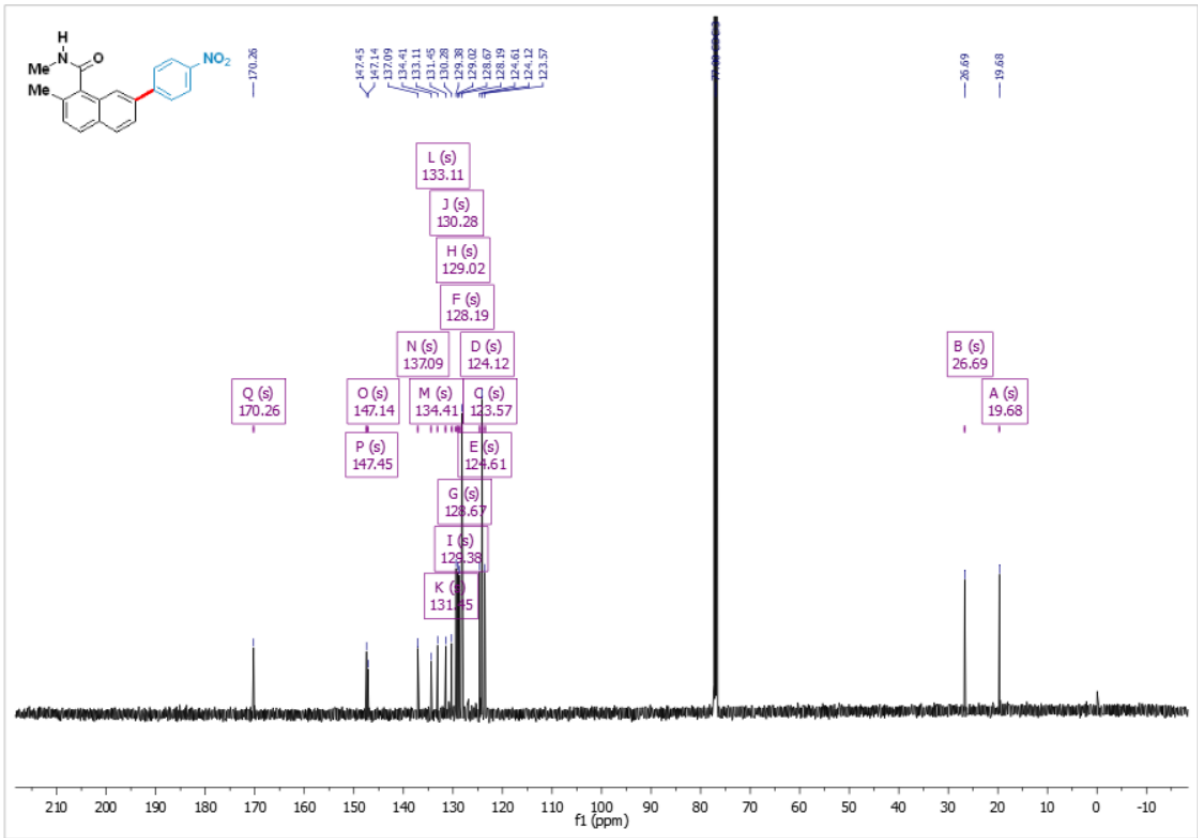

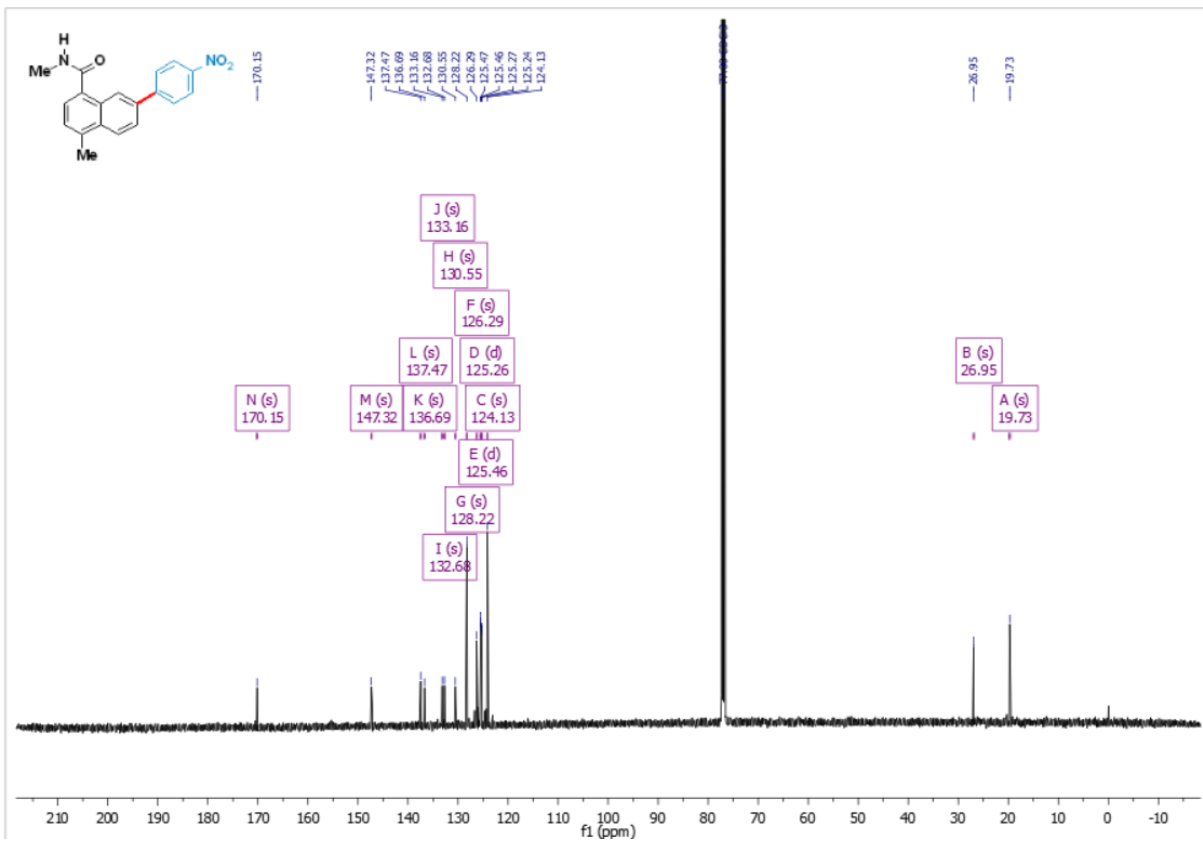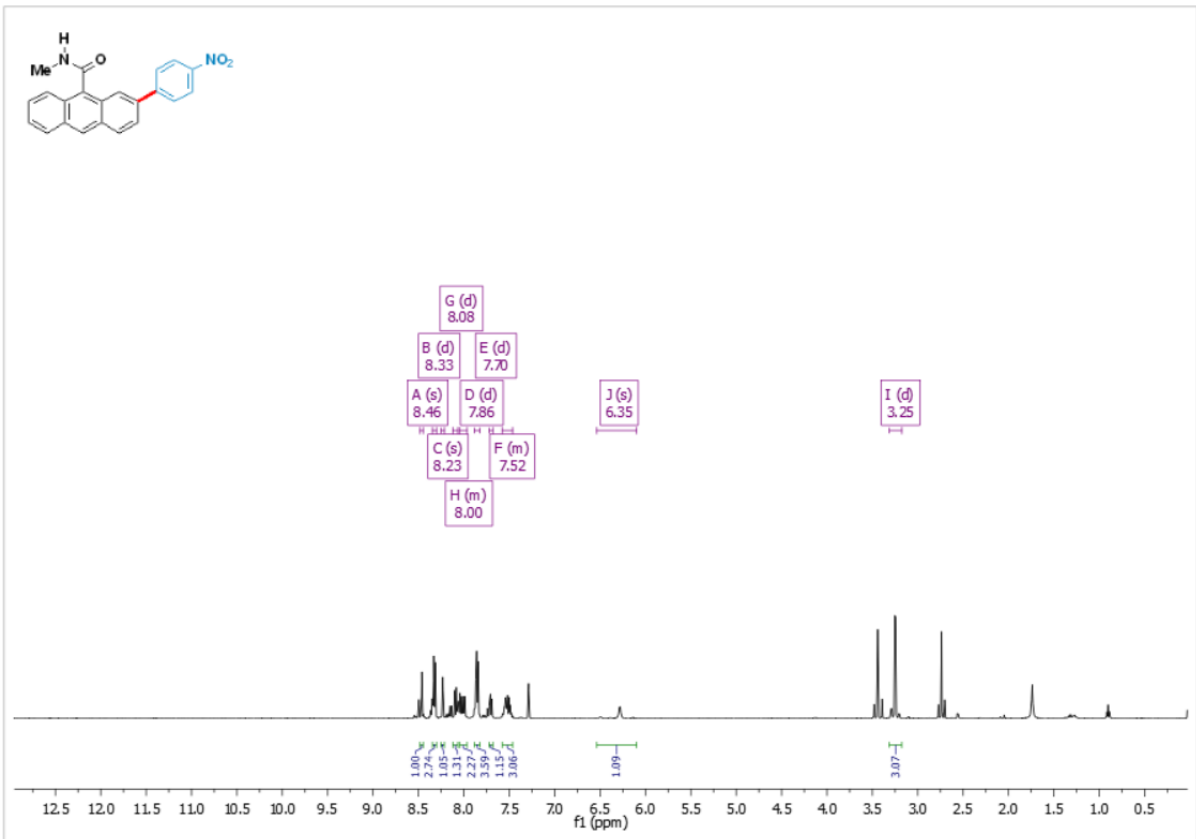

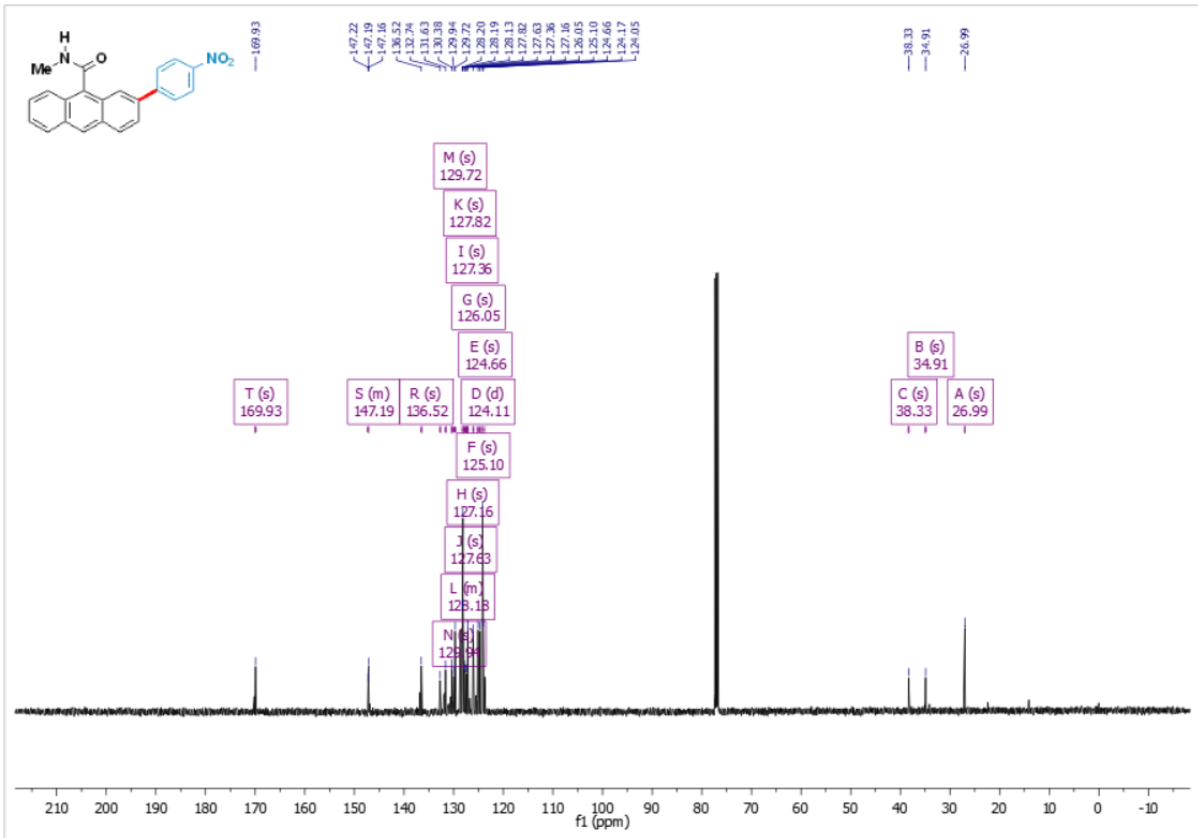

Supplement: Supplementary file 1 [file 146b9f6b0367d06fd144d8a2.pdf]
